# Supplementary material for: Chiral Phosphoric Acid Catalyzed Conversion of Epoxides into Thiiranes: Mechanism, Stereochemical Model, and New Catalyst Design
Source: PubMed Central journal article supplement — Angew Chem Int Ed Engl. 2022 Jan 14;61(9):e202113204. doi: 10.1002/anie.202113204 (PMC9305870; doi:10.1002/anie.202113204), 2022-01-14
Supplement: ANIE-61-0-s002.pdf [file ANIE-61-0-s002.pdf]

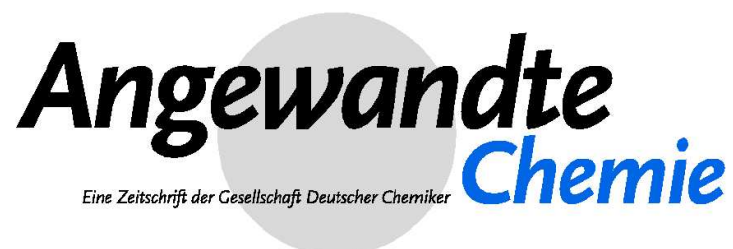

## Supporting Information

### **Chiral Phosphoric Acid Catalyzed Conversion of Epoxides into Thiiranes: Mechanism, Stereochemical Model, and New Catalyst Design**

*M. Duan, C. D. Díaz-Oviedo, Y. Zhou, X. Chen, P. Yu, B. List\*, K. N. Houk\*, Y. Lan\**

# Supporting Information

## Table of contents

|     |                                                                                                                            |     |
|-----|----------------------------------------------------------------------------------------------------------------------------|-----|
| 1.  | Distortion/Interaction Analysis .....                                                                                      | 2   |
| 2.  | Computational and Experimental Results with Aliphatic Substrates .....                                                     | 2   |
| 3.  | Benchmark for Various DFT Methods .....                                                                                    | 3   |
| 4.  | Theoretically Predicted Enantioselectivities at the M06-2X/6-311+<br>G(d,p)-SMD//M06-2X/6-31G(d)-SMD Level of Theory.....  | 3   |
| 5.  | Absolute Calculation Energies, Enthalpies, and Free Energies.....                                                          | 4   |
| 6.  | General Experimental Methods.....                                                                                          | 8   |
| 7.  | Preparation of 3,3'-disubstituted BINOL <i>S7</i> (precursor of ( <i>R</i> )- <i>C7</i> ).....                             | 9   |
| 8.  | Preparation of Chiral Phosphoric Acids ( <i>R</i> )- <i>C5</i> , ( <i>R</i> )- <i>C6</i> and ( <i>R</i> )- <i>C7</i> ..... | 13  |
| 9.  | General Procedure for the CPA-catalyzed Epoxide Thionation .....                                                           | 16  |
| 10. | B3LYP Geometries for All the Optimized Compounds and Transition States .....                                               | 18  |
| 11. | M062X Geometries for All the Optimized Compounds and Transition States .....                                               | 140 |
| 12. | Complete Reference for Gaussian 09.....                                                                                    | 163 |
| 13. | Copies of NMR Spectra .....                                                                                                | 164 |
| 14. | GC Traces.....                                                                                                             | 168 |
| 15. | References.....                                                                                                            | 175 |

## 1. Distortion/Interaction Analysis

**Table S1.** Distortion/Interaction analysis for the enantioselectivity-determining transition states **TS1-R** and **TS1-S**. Energy differences are given in kcal/mol.

|              | $\Delta E(\text{dist-catalyst})$ | $\Delta E(\text{dist-epoxide})$ | $\Delta E(\text{dist-thiolactam})$ | $\Delta E(\text{int})$ |
|--------------|----------------------------------|---------------------------------|------------------------------------|------------------------|
| <b>TS1-R</b> | 57.9                             | 24.6                            | 1.0                                | -102.2                 |
| <b>TS1-S</b> | 63.8                             | 25.6                            | 1.2                                | -107.2                 |

## 2. Computational and Experimental Results with Aliphatic Substrates

**Table S2.** Theoretically predicted and experimentally observed enantioselectivities for the reactions with aliphatic substrates.

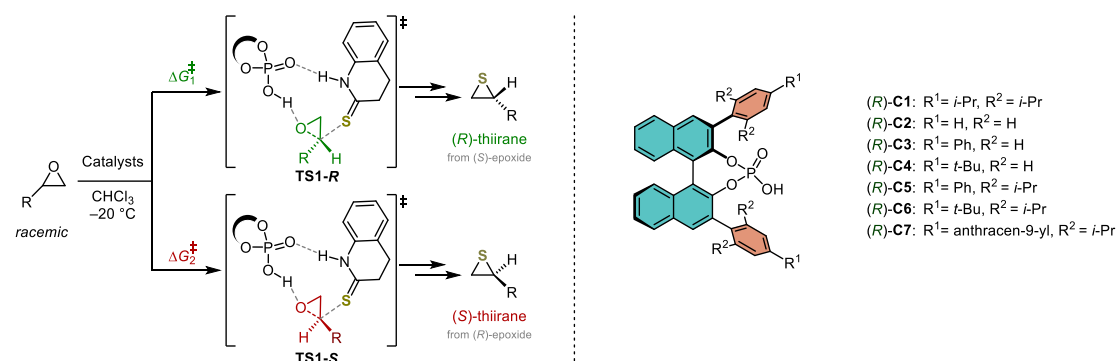

| Catalyst                  | $\Delta\Delta G_{\text{calc}}^{\ddagger} / \Delta\Delta G_{\text{exp}}^{\ddagger}$ <sup>a</sup> | $ee_{\text{calc}} / ee_{\text{exp}}$ <sup>d</sup> | Catalyst              | $\Delta\Delta G_{\text{calc}}^{\ddagger} / \Delta\Delta G_{\text{exp}}^{\ddagger}$ <sup>b</sup> | $ee_{\text{calc}} / ee_{\text{exp}}$ <sup>d</sup> |
|---------------------------|-------------------------------------------------------------------------------------------------|---------------------------------------------------|-----------------------|-------------------------------------------------------------------------------------------------|---------------------------------------------------|
| <b>R = <i>n</i>-hexyl</b> |                                                                                                 |                                                   | <b>R = cyclohexyl</b> |                                                                                                 |                                                   |
| (R)-C1                    | 1.1/1.2                                                                                         | 73/76                                             | (R)-C1                | 1.2/0.6                                                                                         | 77/48                                             |
| (R)-C5                    | 1.4/0.6                                                                                         | 83/45                                             | (R)-C5                | 1.3/0.3                                                                                         | 80/22                                             |
| (R)-C6                    | 1.4/1.0                                                                                         | 83/67                                             | (R)-C6                | 0.7/0.6                                                                                         | 53/45                                             |
| (R)-C7                    | 0.8/0.6                                                                                         | 59/46                                             | (R)-C7                | 0.8/0.6                                                                                         | 59/46                                             |

<sup>a</sup> $\Delta\Delta G_{\text{calc}}^{\ddagger} = \Delta G_{\text{TS2}}^{\ddagger} - \Delta G_{\text{TS1}}^{\ddagger}$ , where  $\Delta G_{\text{TS1}}^{\ddagger}$  and  $\Delta G_{\text{TS2}}^{\ddagger}$  were obtained by theoretical calculations. <sup>b</sup> $\Delta\Delta G_{\text{exp}}^{\ddagger}$  is extrapolated by experimentally observed  $ee$  ( $\Delta\Delta G^{\ddagger} = -RT \ln(1-ee)/(1+ee)$ ). <sup>c</sup> $ee$  value obtained by theoretical calculations. <sup>d</sup> $ee$  value obtained by experiment.

We also using the new designed CPA catalysts for the thionation reaction of aliphatic epoxides with thiolactam **3a** (Table S2). Both computational and experimental results

demonstrated that the reactions proceed with low enantioselectivity. Based on the first enantioselectivity-determining model (Figure 4a), the phenyl group on the epoxide **1** (*rac*-styrene oxide) is much closer to the *para*-substituents of the catalyst in the unfavorable transition state **TS1-S**. When the phenyl group of the substrate is replaced by a cyclohexyl or *n*-hexyl group, the attractive dispersion interactions between the catalyst and aliphatic groups favour transition state **TS1-S**. Therefore, the enantioselectivity is reduced.

### 3. Benchmark for Various DFT Methods

**Table S3.** Benchmark for various DFT methods using the def2-TZVP basis set (Except for PWPB95-D3BJ with the def2-TZVPP basis set). All numbers are given in kcal/mol.

|                 | $\omega$ B97X-<br>D3 | $\omega$ B97M-<br>V | $\omega$ B97M-<br>D3BJ | $\omega$ B97M-<br>D4 | PWPB95-<br>D3BJ | AVERAGE<br>$\Delta\Delta G^\ddagger$ |
|-----------------|----------------------|---------------------|------------------------|----------------------|-----------------|--------------------------------------|
| ( <i>R</i> )-C1 | 2.0                  | 2.0                 | 1.8                    | 1.9                  | 1.8             | 1.9(+/-0.1)                          |
| ( <i>R</i> )-C2 | 1.4                  | 1.4                 | 1.3                    | 1.5                  | 1.2             | 1.4(+/-0.2)                          |
| ( <i>R</i> )-C3 | 0.3                  | 0.3                 | 0.6                    | 0.6                  | 0.3             | 0.4(+/-0.2)                          |
| ( <i>R</i> )-C4 | -0.2                 | -0.3                | 0.0                    | 0.0                  | -0.8            | -0.3(+/-0.4)                         |
| ( <i>R</i> )-C5 | 2.2                  | 2.2                 | 2.0                    | 2.1                  | 2.5             | 2.2(+/-0.3)                          |
| ( <i>R</i> )-C6 | 3.4                  | 3.3                 | 3.3                    | 3.4                  | 3.1             | 3.3(+/-0.2)                          |
| ( <i>R</i> )-C7 | 4.7                  | 4.6                 | 4.1                    | 4.1                  | 3.6             | 4.2(+/-0.6)                          |

### 4. Theoretically Predicted Enantioselectivities at the M06-2X/6-311+G(d,p)-SMD//M06-2X/6-31G(d)-SMD Level of Theory

**Table S4.** Theoretically predicted enantioselectivities  $\Delta\Delta G^\ddagger$  of various CPAs. Free energies are given in kcal/mol.

|                 | M06-2X/6-311+G(d,p)-SMD<br>//M06-2X/6-31G(d)-SMD <sup>1</sup> | M06-2X/6-311+G(d,p)-SMD<br>//B3LYP/6-31G(d) <sup>2</sup> |
|-----------------|---------------------------------------------------------------|----------------------------------------------------------|
| ( <i>R</i> )-C1 | 2.1                                                           | 1.9                                                      |
| ( <i>R</i> )-C2 | 0.8                                                           | 1.0                                                      |
| ( <i>R</i> )-C3 | 0.6                                                           | 0.7                                                      |
| ( <i>R</i> )-C4 | 0.4                                                           | 0.4                                                      |
| ( <i>R</i> )-C5 | 1.9                                                           | 3.1                                                      |
| ( <i>R</i> )-C6 | 2.3                                                           | 3.6                                                      |
| ( <i>R</i> )-C7 | 5.4                                                           | 4.2                                                      |

<sup>1</sup> Geometry optimizations were performed with the SMD solvation model at the M06-2X/6-31G(d) level of theory, then single-point energies were computed with the SMD solvation model at the M06-2X/6-311+G(d,p) level of theory using the gas-phase-optimized structures. <sup>2</sup> Geometry optimizations were performed at the B3LYP/6-31G(d) level of theory, then single-point energies were computed with the SMD solvation model at the M06-2X/6-311+G(d,p) level of theory using the gas-phase-optimized structures.

## 5. Absolute Calculation Energies, Enthalpies, and Free Energies

**Table S5.** Absolute calculation energies, enthalpies, and free energies at the M06-2X/6-311+G(d,p)-SMD//B3LYP/6-31G(d) level of theory.

| Geometry          | $E_{(\text{elec-B3LYP})}^1$ | $G_{(\text{corr-B3LYP})}^2$ | $H_{(\text{corr-B3LYP})}^3$ | $E_{(\text{solv,M06-2X})}^4$ | IF <sup>5</sup> |
|-------------------|-----------------------------|-----------------------------|-----------------------------|------------------------------|-----------------|
| <b>(R)-1</b>      | -384.838385                 | 0.107234                    | 0.147439                    | -384.797634                  | -               |
| <b>(R)-2</b>      | -707.829279                 | 0.103705                    | 0.145456                    | -707.789269                  | -               |
| <b>(S)-1</b>      | -384.838385                 | 0.107234                    | 0.147439                    | -384.797634                  | -               |
| <b>(S)-2</b>      | -707.829268                 | 0.103748                    | 0.145473                    | -707.789266                  | -               |
| <b>3a</b>         | -801.328581                 | 0.128062                    | 0.171808                    | -801.282923                  | -               |
| <b>4b</b>         | -478.372673                 | 0.130835                    | 0.173468                    | -478.330015                  | -               |
| <b>(R)-C1</b>     | -2582.023457                | 0.863614                    | 1.010433                    | -2581.746428                 | -               |
| <b>(R)-C2</b>     | -1874.384407                | 0.386487                    | 0.474888                    | -1874.252716                 | -               |
| <b>(R)-C3</b>     | -2336.490156                | 0.534907                    | 0.646404                    | -2336.301198                 | -               |
| <b>(R)-C4</b>     | -2188.889585                | 0.599755                    | 0.712154                    | -2188.696522                 | -               |
| <b>(R)-C5</b>     | -2808.243702                | 0.854926                    | 1.003486                    | -2807.961600                 | -               |
| <b>(R)-C6</b>     | -2660.642497                | 0.919062                    | 1.069224                    | -2660.356020                 | -               |
| <b>(R)-C7</b>     | -3422.780704                | 1.026695                    | 1.201139                    | -3422.426021                 | -               |
| <b>(R)-5-CP-R</b> | -3994.465768                | 1.134108                    | 1.325618                    | -3994.105059                 | -               |
| <b>(R)-6-CP-R</b> | -3846.861144                | 1.201905                    | 1.393681                    | -3846.502351                 | -               |
| <b>(R)-7-CP-R</b> | -4609.000978                | 1.309183                    | 1.525515                    | -4608.574826                 | -               |
| <b>I</b>          | -3383.380155                | 1.012685                    | 1.183981                    | -3383.050064                 | -               |
| <b>II-R</b>       | -3768.241979                | 1.146294                    | 1.334732                    | -3767.892049                 | -               |
| <b>II-S</b>       | -3768.239270                | 1.147066                    | 1.334762                    | -3767.890006                 | -               |

|                          |              |          |          |              |         |
|--------------------------|--------------|----------|----------|--------------|---------|
| <b>III-R</b>             | -1186.195853 | 0.259490 | 0.322335 | -1186.118205 | -       |
| <b>III-S</b>             | -1186.195225 | 0.259984 | 0.322387 | -1186.118584 | -       |
| <b>IV-R</b>              | -3768.244116 | 1.141848 | 1.332666 | -3767.887233 | -       |
| <b>IV-S</b>              | -3768.245260 | 1.143364 | 1.332704 | -3767.889634 | -       |
| <b>V</b>                 | -3060.431647 | 1.016200 | 1.185931 | -3060.101657 | -       |
| <b>TS1-R</b>             | -3768.210454 | 1.140934 | 1.331839 | -3767.843933 | -280.21 |
| <b>TS1-S</b>             | -3768.207928 | 1.141020 | 1.332129 | -3767.841045 | -289.01 |
| <b>TS2-R</b>             | -3768.225135 | 1.146449 | 1.330690 | -3767.875002 | -476.55 |
| <b>TS2-S</b>             | -3768.222764 | 1.149263 | 1.330921 | -3767.874746 | -506.40 |
| <b>TS3-R</b>             | -3768.225293 | 1.144196 | 1.329858 | -3767.868668 | -329.88 |
| <b>TS3-S</b>             | -3768.230195 | 1.143742 | 1.329596 | -3767.872807 | -732.76 |
| <b>TS4-R</b>             | -3768.222541 | 1.139288 | 1.330113 | -3767.853917 | -336.24 |
| <b>TS4-S</b>             | -3768.221490 | 1.140131 | 1.330087 | -3767.853403 | -351.50 |
| <b>TS5-R</b>             | -3060.571912 | 0.660645 | 0.796285 | -3060.346224 | -272.42 |
| <b>TS5-S</b>             | -3060.570449 | 0.661309 | 0.796325 | -3060.345367 | -297.88 |
| <b>(R)-3-TS1-R</b>       | -3522.679010 | 0.809555 | 0.967861 | -3522.396868 | -266.04 |
| <b>(R)-3-TS1-S</b>       | -3522.676305 | 0.810147 | 0.967756 | -3522.396343 | -273.57 |
| <b>(R)-4-TS1-R</b>       | -3375.076785 | 0.874600 | 1.033557 | -3374.791212 | -277.36 |
| <b>(R)-4-TS1-S</b>       | -3375.075176 | 0.874805 | 1.033429 | -3374.790762 | -292.07 |
| <b>(R)-5-TS1-R</b>       | -3994.431089 | 1.130710 | 1.325022 | -3994.061364 | -271.59 |
| <b>(R)-5-TS1-S</b>       | -3994.430578 | 1.132424 | 1.325409 | -3994.058135 | -276.28 |
| <b>(R)-6-TS1-R</b>       | -3846.829603 | 1.194972 | 1.390487 | -3846.454661 | -284.04 |
| <b>(R)-6-TS1-S</b>       | -3846.827123 | 1.197058 | 1.390904 | -3846.451052 | -292.68 |
| <b>(R)-7-TS1-R</b>       | -4608.970440 | 1.305851 | 1.522772 | -4608.527206 | -271.05 |
| <b>(R)-7-TS1-S</b>       | -4608.967570 | 1.306759 | 1.523494 | -4608.521444 | -256.89 |
| <b>(R)-5-TS4-R</b>       | -3994.444193 | 1.130636 | 1.323266 | -3994.071373 | -341.07 |
| <b>(R)-6-TS4-R</b>       | -3846.841738 | 1.195664 | 1.389080 | -3846.463654 | -335.47 |
| <b>(R)-7-TS4-R</b>       | -4608.981485 | 1.305343 | 1.520958 | -4608.534474 | -342.65 |
| <b>TS1-R-cyclohexyl-</b> | -4612.595341 | 1.595301 | 1.377458 | -4612.139243 | -280.78 |

---

|                                 |              |          |          |              |         |
|---------------------------------|--------------|----------|----------|--------------|---------|
| <b>anthryl</b>                  |              |          |          |              |         |
| <b>TS1-R-cyclohexyl-iPr</b>     | -3771.836644 | 1.40442  | 1.212466 | -3771.45761  | -292.29 |
| <b>TS1-R-cyclohexyl-Ph</b>      | -3998.057382 | 1.397574 | 1.202315 | -3997.673808 | -282.91 |
| <b>TS1-R-cyclohexyl-tBu</b>     | -3850.455773 | 1.463532 | 1.268953 | -3850.066667 | -289.87 |
| <b>TS1-R-n-hexyl-anthryl</b>    | -4613.800361 | 1.617045 | 1.392344 | -4613.333946 | -303.06 |
| <b>TS1-R-n-hexyl-iPr</b>        | -3773.040542 | 1.426145 | 1.227131 | -3772.649651 | -308.56 |
| <b>TS1-R-n-hexyl-Ph</b>         | -3999.26025  | 1.419494 | 1.216433 | -3998.866816 | -317.5  |
| <b>TS1-R-n-hexyl-tBu</b>        | -3851.65841  | 1.484869 | 1.280627 | -3851.259552 | -326.69 |
| <b>TS1-S-cyclohexyl-anthryl</b> | -4612.594389 | 1.59552  | 1.378873 | -4612.139353 | -295.67 |
| <b>TS1-S-cyclohexyl-iPr</b>     | -3771.833922 | 1.404302 | 1.212047 | -3771.455325 | -304.33 |
| <b>TS1-S-cyclohexyl-Ph</b>      | -3998.055073 | 1.397523 | 1.202713 | -3997.672155 | -300.94 |
| <b>TS1-S-cyclohexyl-tBu</b>     | -3850.453047 | 1.463449 | 1.268519 | -3850.065128 | -300.43 |
| <b>TS1-S-n-hexyl-anthryl</b>    | -4613.79692  | 1.616918 | 1.394361 | -4613.334763 | -329.26 |

---

|                                 |              |          |          |              |         |
|---------------------------------|--------------|----------|----------|--------------|---------|
| <b>TS1-S-<i>n</i>-hexyl-iPr</b> | -3773.036781 | 1.425939 | 1.227741 | -3772.648477 | -333.76 |
| <b>TS1-S-<i>n</i>-hexyl-Ph</b>  | -3999.259326 | 1.419164 | 1.219149 | -3998.867376 | -333.25 |
| <b>TS1-S-<i>n</i>-hexyl-tBu</b> | -3851.65624  | 1.484851 | 1.280567 | -3851.257247 | -346.93 |

<sup>1</sup>The electronic energy calculated by B3LYP in gas phase. <sup>2</sup>The thermal correction to Gibbs free energy calculated by B3LYP in gas phase. <sup>3</sup>The thermal correction to enthalpy calculated by B3LYP in gas phase. <sup>4</sup>The electronic energy calculated by M06-2X in chloroform solvent. <sup>5</sup>The B3LYP calculated imaginary frequencies for the transition states.

**Table S6.** Absolute calculation energies, enthalpies, and free energies at the M06-2X/6-311+G(d,p)-SMD//M06-2X/6-31G(d)-SMD level of theory.

| Geometry             | $E_{(\text{elec-M06-2X})}^1$ | $G_{(\text{corr-M06-2X})}^2$ | $H_{(\text{corr-M06-2X})}^3$ | $E_{(\text{solv,M06-2X})}^4$ | IF <sup>5</sup> |
|----------------------|------------------------------|------------------------------|------------------------------|------------------------------|-----------------|
| <b>M-(R)-3-TS1-R</b> | -3521.587375                 | 0.826963                     | 0.977399                     | -3522.40453                  | -412.3          |
| <b>M-(R)-3-TS1-S</b> | -3521.586741                 | 0.827276                     | 0.977549                     | -3522.403816                 | -429.62         |
| <b>M-(R)-4-TS1-R</b> | -3374.011132                 | 0.894083                     | 1.043733                     | -3374.79929                  | -432.66         |
| <b>M-(R)-4-TS1-S</b> | -3374.009631                 | 0.893649                     | 1.044246                     | -3374.798233                 | -428.36         |
| <b>M-(R)-5-TS1-R</b> | -3993.124007                 | 1.151734                     | 1.336827                     | -3994.071676                 | -434.6          |
| <b>M-(R)-5-TS1-S</b> | -3993.120209                 | 1.151906                     | 1.336307                     | -3994.068748                 | -426.27         |
| <b>M-(R)-6-TS1-R</b> | -3845.545007                 | 1.217501                     | 1.402279                     | -3846.463843                 | -417.83         |
| <b>M-(R)-6-TS1-S</b> | -3845.540527                 | 1.216938                     | 1.402381                     | -3846.459611                 | -441.77         |
| <b>M-(R)-7-TS1-R</b> | -4607.443755                 | 1.330685                     | 1.536785                     | -4608.540887                 | -379.79         |
| <b>M-(R)-7-TS1-S</b> | -4607.43831                  | 1.333283                     | 1.537983                     | -4608.534916                 | -413.34         |
| <b>M-TS1-R</b>       | -3766.9583                   | 1.161951                     | 1.343057                     | -3767.854728                 | -437.3          |
| <b>M-TS1-S</b>       | -3766.95455                  | 1.162221                     | 1.343657                     | -3767.851612                 | -434.88         |
| <b>M-TS5-R</b>       | -3059.654476                 | 0.67595                      | 0.804332                     | -3060.354217                 | -435            |
| <b>M-TS5-S</b>       | -3059.653607                 | 0.675649                     | 0.804789                     | -3060.352678                 | -433.94         |



<sup>1</sup>The electronic energy calculated by M06-2X in gas phase. <sup>2</sup>The thermal correction to Gibbs free energy calculated by M06-2X in gas phase. <sup>3</sup>The thermal correction to enthalpy calculated by M06-2X in gas phase. <sup>4</sup>The electronic energy calculated by M06-2X in chloroform solvent. <sup>5</sup>The M06-2X calculated imaginary frequencies for the transition states.

## 6. General Experimental Methods

Unless otherwise stated, all reagents were purchased from commercial suppliers and used without further purification. *rac*-Styrene oxide was distilled under reduced pressure and stored under argon before use. All solvents used in the reactions were distilled from appropriate drying agents before use. Reactions were monitored by thin-layer chromatography (TLC) on silica gel pre-coated plastic sheets (0.2 mm, Macherey-Nagel) or glass plates (SIL G-25 UV<sub>254</sub>, 0.25 mm, Macherey-Nagel). Visualization was accomplished by irradiation with UV light at 254/366 nm and/or with the following stains: CAM (10 g ammonium molybdate + 4 g ceric ammonium sulfate, dissolved in 360 mL distilled water and treated with 40 mL concentrated H<sub>2</sub>SO<sub>4</sub>), PMA (10 g phosphomolybdic acid dissolved in 100 mL absolute ethanol), KMnO<sub>4</sub> (1.5 g KMnO<sub>4</sub> + 10 g Na<sub>2</sub>CO<sub>3</sub>, dissolved in 200 mL distilled water and treated with 1.25 mL aq. NaOH 10%). Column chromatography was performed on Merck silica gel (60, particle size 0.040–0.063 mm). Preparative TLC was performed on Macherey-Nagel SIL G-25 UV<sub>254</sub> plates (silica gel 60, 0.25 mm layer, 20 cm x 20 cm, with fluorescence indicator). NMR spectra were recorded on a Bruker AV-500 spectrometer in deuterated solvents. Proton chemical shifts are reported in ppm ( $\delta$ ) relative to tetramethylsilane (TMS) with the solvent resonance employed as the internal standard (CDCl<sub>3</sub>  $\delta$  7.26 ppm; CD<sub>2</sub>Cl<sub>2</sub>  $\delta$  5.32 ppm). Data are reported as follows: chemical shift, multiplicity (s = singlet, d = doublet, t = triplet, q = quartet, p = pentet, sext = sextet, hept = heptet, m = multiplet, br = broad), coupling constants (Hz) and integration. <sup>13</sup>C chemical shifts are reported in ppm from tetramethylsilane (TMS) with the solvent resonance as the internal standard (CDCl<sub>3</sub>  $\delta$  77.16 ppm; CD<sub>2</sub>Cl<sub>2</sub>  $\delta$  53.84 ppm). High-resolution mass spectra were determined on a Bruker APEX III FTMS (7 T magnet). Enantiomeric ratios (e.r.) were determined by GC analysis employing a chiral stationary phase column specified in the individual experiment, by comparing the samples with the appropriate racemic mixtures.

## 7. Preparation of 3,3'-disubstituted BINOL **S7** (precursor of (*R*)-**C7**)

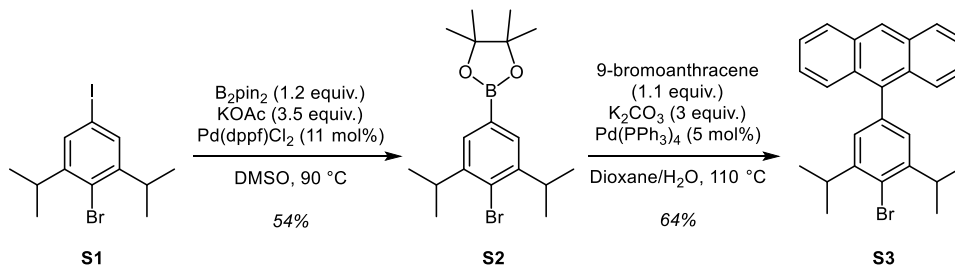

The synthesis of **S3** has previously been reported by using a Suzuki cross-coupling reaction of **S1** with 9-anthracenyl boronic acid [3]. However, we observed that the latter readily undergoes protodeboronation with traces of water to produce anthracene, which co-elutes with the desired product **S3** during column chromatography. Instead, the proposed inversed-polarity two-step sequence easily provides **S3** with high purity.

### **2-(4-bromo-3,5-diisopropylphenyl)-4,4,5,5-tetramethyl-1,3,2-dioxaborolane (S2):**

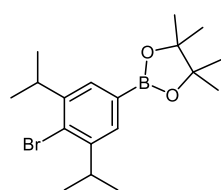

Adapted from Ref. [1]: An oven-dried 50 mL Schlenk flask was charged with 2-bromo-5-iodo-1,3-diisopropylbenzene [2] (**S1**, 2.50 g, 6.81 mmol, 1 equiv.), bis-(pinacolato)-diboron (2.11 g, 8.30 mmol, 1.2 equiv.), Pd(dppf)Cl<sub>2</sub>·CH<sub>2</sub>Cl<sub>2</sub> (612 mg, 0.75 mmol, 0.11 equiv.), and DMSO (21 mL). The mixture was purged with argon for 5 min, followed by addition of potassium acetate (2.34 g, 23.8 mmol, 3.5 equiv.). The reaction mixture was stirred vigorously at 90 °C for 16 h. After cooling to room temperature, the reaction was diluted with MTBE (50 mL) and filtered over a short pad of Celite. The filtered mixture was washed with water (1 x 30 mL) and the aqueous layer was further extracted with MTBE (2 x 20 mL). The combined organic phases were washed with brine (1 x 30 mL), dried over anhydrous Na<sub>2</sub>SO<sub>4</sub>, filtered and concentrated in vacuo, and the crude product was purified by column chromatography (silica gel, *iso*-hexane/CH<sub>2</sub>Cl<sub>2</sub> mixture, gradient from 100:0 to 80:20 v/v) to give **S2** (1.347 g, 54% yield) as a white solid.

<sup>1</sup>H NMR (CD<sub>2</sub>Cl<sub>2</sub>, 501 MHz): δ 7.50 (s, 2H), 3.50 (hept, *J* = 6.8 Hz, 2H), 1.33 (s, 12H), 1.28 (d, *J* = 6.8 Hz, 12H). <sup>13</sup>C NMR (CD<sub>2</sub>Cl<sub>2</sub>, 126 MHz): δ 147.5 (C), 130.70 (C), 130.66 (CH), 84.3 (C), 34.0 (CH), 25.1 (CH<sub>3</sub>), 23.2 (CH<sub>3</sub>). <sup>11</sup>B NMR (CD<sub>2</sub>Cl<sub>2</sub>, 161 MHz): δ 30.9. HRMS (ESI): calculated for C<sub>18</sub>H<sub>28</sub>O<sub>2</sub>BBrNa<sup>+</sup> ([M+Na]<sup>+</sup>): 389.1258, found: 389.1260.

### 9-(4-bromo-3,5-diisopropylphenyl)anthracene (**S3**):

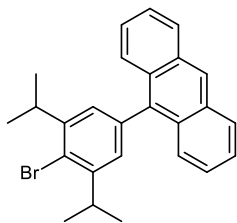

An oven-dried 50 mL Schlenk flask was charged with 2-(4-bromo-3,5-diisopropylphenyl)-4,4,5,5-tetramethyl-1,3,2-dioxaborolane (**S2**, 1.34 g, 3.65 mmol, 1 equiv.), 9-bromoanthracene (1.03 g, 4.02 mmol, 1.1 equiv.), and  $K_2CO_3$  (1.51 g, 11.0 mmol, 3 equiv.). The flask was evacuated and back-filled with argon, then 1,4-dioxane (18 mL) and distilled water (4 mL) were added and the mixture was degassed by bubbling argon for 5 min, followed by addition of  $Pd(PPh_3)_4$  (211 mg, 0.18 mmol, 0.05 equiv.) The reaction mixture was stirred vigorously at 110 °C for 72 h. After cooling to room temperature, the reaction was diluted with MTBE (70 mL) and water (30 mL), and the aqueous phase was further extracted with MTBE (2 x 30 mL). The combined organic phases were washed with brine (1 x 30 mL), dried over anhydrous  $Na_2SO_4$ , filtered and concentrated in vacuo, and the crude product was purified by column chromatography (silica gel, *iso*-hexane; mass ratio silica/sample 150:1, height/diameter ratio  $\approx$  3:1) to give **S3** (968 mg, 64% yield) as an off-white solid (photosensitive, kept under dark and under argon, in a vial covered with aluminum foil).

$^1H$  NMR ( $CD_2Cl_2$ , 501 MHz):  $\delta$  8.52 (s, 1H), 8.06 (d,  $J = 8.7$  Hz, 2H), 7.66 (dd,  $J = 8.8$  Hz, 1.1 Hz, 2H), 7.48 (br t,  $J = 7.5$  Hz, 2H), 7.37 (ddd,  $J = 8.8$  Hz, 6.5 Hz, 1.3 Hz, 2H), 7.21 (s, 2H), 3.64 (hept,  $J = 6.9$  Hz, 2H), 1.27 (d,  $J = 6.9$  Hz, 12H).  $^{13}C$  NMR ( $CD_2Cl_2$ , 126 MHz):  $\delta$  148.1 (C), 138.0 (C), 137.0 (C), 131.6 (C), 130.3 (C), 128.6 (CH), 127.5 (CH), 127.0 (CH), 126.8 (C), 125.9 (C), 125.8 (CH), 125.5 (CH), 34.0 (CH), 23.2 ( $CH_3$ ). HRMS (APPI): calculated for  $C_{26}H_{26}Br^+$  ( $[M+H]^+$ ): 417.1212, found: 417.1210. The analytical data matches those reported in the literature [3].

The installation of 2,6-diisopropyl-4-substituted-phenyl (“4-R-DIP”) substituents on the 3,3’-positions of the BINOL moiety was performed by cross-coupling reactions. With the substituent in position 4 being either phenyl or *tert*-butyl, reported procedures using Kumada coupling were followed ([4] and [5], respectively), leading to BINOLs **S5** and **S6**, respectively.

With the 9-anthracenyl substituent, the reported Kumada coupling ([3]) presented reproducibility issues, whereas the following Negishi coupling performed satisfactorily, giving thus access to the BINOL **S7**.

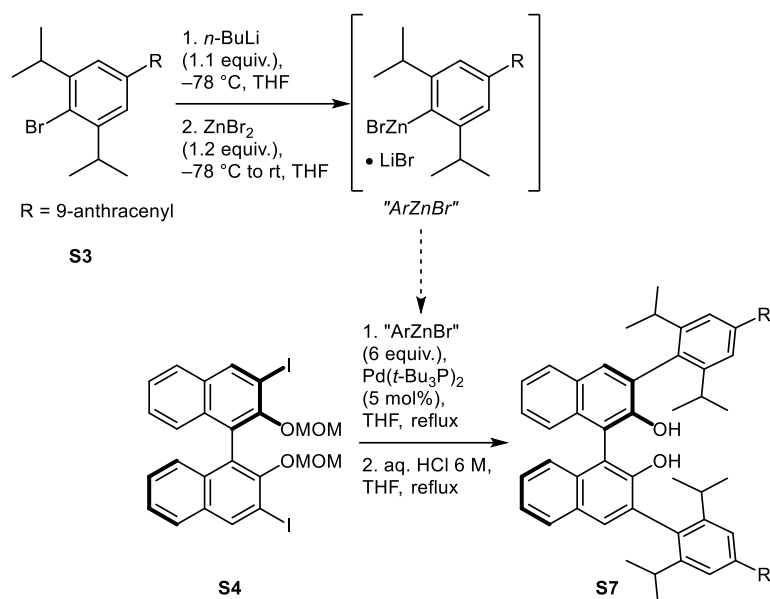

#### Preparation of organozinc coupling partner:

An oven-dried 10 mL Schlenk flask was purged with argon and flame-dried under vacuum. Using "argon trousers", anhydrous ZnBr<sub>2</sub> was added to the previously weighed Schlenk flask and further dried under vacuum (120 °C, 10<sup>-3</sup> mbar) for 2 h. After cooling to room temperature, the mass of dry ZnBr<sub>2</sub> was determined and dissolved in the corresponding volume of dry THF to generate a 1 M solution.

Another oven-dried 25 mL Schlenk flask, previously purged with argon, was charged with the aryl bromide **S3** (2 mmol, 1 equiv.) and dry THF (6.5 mL). After cooling to -78 °C, *n*-BuLi (2.2 mmol, 1.1 equiv., freshly titrated) was added dropwise over 2 min and the mixture is stirred vigorously for 1 h.

After checking completion of lithium-halogen exchange by <sup>1</sup>H NMR (comparison of aliquot quenching with CH<sub>3</sub>OH and with CD<sub>3</sub>OD), ZnBr<sub>2</sub> 1 M solution (1.2 equiv.) was added at -78 °C. The mixture was further stirred at -78 °C for 30 min, then gradually warmed to room temperature and further stirred for 1 h. The solvent was removed under vacuum, using a liquid N<sub>2</sub> trap in between, giving the desired organozinc derivative (yield is assumed quantitative for the next step).

#### Negishi cross-coupling and MOM deprotection:

The Schlenk flask, containing the previously prepared organozinc derivative (2 mmol, 6 equiv.), was charged with **S4** ([6]) (208 mg, 0.33 mmol, 1 equiv.) and Pd(*t*-Bu<sub>3</sub>P)<sub>2</sub> (8.5 mg, 0.017 mmol, 0.05 equiv.). The flask was evacuated and back-filled with argon (×3), then dry THF (2.5 mL) was added and the reaction mixture was stirred vigorously

at 80 °C for 24 h. After cooling to room temperature, the reaction was diluted with MTBE (30 mL) and water (20 mL), and the aqueous phase was further extracted with MTBE (2 x 30 mL). The combined organic phases were washed with brine (1 x 30 mL), dried over anhydrous Na<sub>2</sub>SO<sub>4</sub>, filtered and concentrated in vacuo.

This crude product was redissolved in THF (5 mL), and treated with methanol (0.5 mL) and aq. HCl 6 M (2.5 mL), then the flask was closed and the mixture was heated at 80 °C for 12 h.

After cooling to room temperature, the reaction was diluted with MTBE (40 mL) and water (30 mL), and the aqueous phase was further extracted with MTBE (2 x 30 mL). The combined organic phases were washed with brine (1 x 30 mL), dried over anhydrous Na<sub>2</sub>SO<sub>4</sub>, filtered and concentrated in vacuo, and the crude product was purified by column chromatography (silica gel, pentane-CH<sub>2</sub>Cl<sub>2</sub> mixture, gradient from 100:0 to 80:20).

**(*R*)-3,3'-bis(4-(anthracen-9-yl)-2,6-diisopropylphenyl)-[1,1'-binaphthalene]-2,2'-diol (**S7**):**

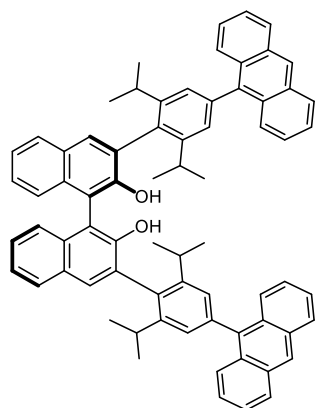

Starting from 417 mg (1.0 mmol) of aryl bromide **S3** and 102 mg (0.16 mmol) of diiodo derivative **S4**, the corresponding 3,3'-disubstituted BINOL **S7** was obtained in 65% yield (100.8 mg, 0.105 mmol) as an off-white solid.

<sup>1</sup>H NMR (CD<sub>2</sub>Cl<sub>2</sub>, 501 MHz): δ 7.08 (d, *J* = 1.5 Hz, 2H), 6.92 (br t, *J* = 1.6 Hz, 1H), 2.88 (hept, *J* = 6.9 Hz, 2H), 1.32 (s, 9H), 1.25 (d, *J* = 6.9 Hz, 12H). <sup>13</sup>C NMR (CD<sub>2</sub>Cl<sub>2</sub>, 126 MHz): δ 151.2 (C), 148.71 (C), 148.67 (C), 139.4 (C), 138.2

(C), 134.0 (C), 132.7 (C), 131.9 (C), 131.4 (CH), 130.6 (C), 130.5 (C), 129.8 (C), 129.4 (C), 128.9 (CH), 128.8 (CH), 128.7 (CH), 127.33 (CH), 127.29 (CH), 126.8 (CH), 126.7 (CH), 125.83 (CH), 125.79 (CH), 125.56 (CH), 124.7 (CH), 124.4 (CH), 113.7 (C), 31.5 (CH), 24.5 (CH<sub>3</sub>), 24.4 (CH<sub>3</sub>), 24.1 (CH<sub>3</sub>), 24.0 (CH<sub>3</sub>). ESI-HRMS: calculated for C<sub>72</sub>H<sub>61</sub>O<sub>2</sub><sup>-</sup> ([M-H]<sup>-</sup>): 957.4677, found: 957.4667. The analytical data matches those reported in the literature [3].

## 8. Preparation of Chiral Phosphoric Acids (*R*)-C5, (*R*)-C6 and (*R*)-C7

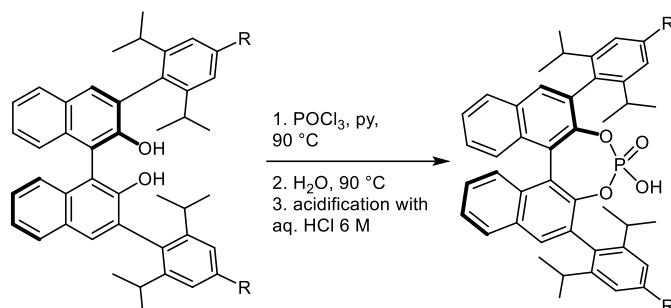

### General Procedure for the synthesis of BINOL-derived phosphoric acids:

An oven-dried 10 mL Schlenk flask was charged with 3,3'-disubstituted (*R*)-BINOL (0.1 mmol) and dry pyridine (2.5 mL). To this solution, POCl<sub>3</sub> (17  $\mu$ L, 0.18 mmol, 1.8 equiv.) was added dropwise; then, the flask was closed under argon and the mixture was stirred at 90 °C for 24 h. After cooling to room temperature and checking full conversion by TLC, distilled water (0.20 mL, 11.1 mmol, 111 equiv.) was added and the mixture was further stirred at 90 °C for 24 h. After cooling to room temperature, the mixture was diluted with CH<sub>2</sub>Cl<sub>2</sub> (30 mL), water (20 mL) and aq. HCl 6 M (10 mL); the aqueous layer was further extracted with CH<sub>2</sub>Cl<sub>2</sub> (2 x 20 mL), and the combined organic layers were washed with aq. HCl 1 M (1 x 20 mL) and brine (1 x 20 mL), dried over anhydrous Na<sub>2</sub>SO<sub>4</sub>, filtered and concentrated in vacuo. The crude product was purified by column chromatography (silica gel, *iso*-hexane-EtOAc mixture, gradient from 90:10 to 70:30) and concentrated in vacuo. The product was dissolved in CH<sub>2</sub>Cl<sub>2</sub> (20 mL), treated with aq. HCl 6 M (15 mL) and stirred vigorously for 30 min; the organic layer was diluted with toluene (20 mL) and concentrated under reduced pressure, then dissolved again in toluene and concentrated (this cycle is repeated 3x). The acidified BINOL-derived phosphoric acid was dried on high vacuum (room temperature, 10<sup>-3</sup> mbar) overnight.

**(*R*)-2,6-bis(3,5-diisopropyl-[1,1'-biphenyl]-4-yl)-4-hydroxydinaphtho[2,1-*d*:1',2'-*f*][1,3,2]dioxaphosphepine 4-oxide ((*R*)-C5)**

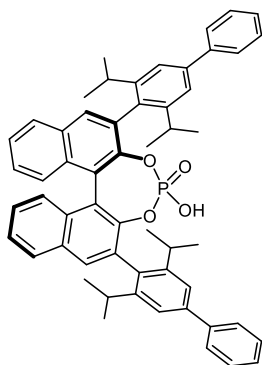

Starting from 50.0 mg (0.066 mmol) of the corresponding 3,3'-disubstituted BINOL (**S5** [4]), 34.1 mg of phosphoric acid (*R*)-**C5** are obtained (63% yield). <sup>1</sup>H NMR (CD<sub>2</sub>Cl<sub>2</sub>, 501 MHz): δ 7.94 (d, *J* = 8.2 Hz, 2H), 7.83 (s, 2H), 7.56 (d, *J* = 7.5 Hz, 4H), 7.52 (t, *J* = 8.0 Hz, 2H), 7.39 (t, *J* = 7.6 Hz, 4H), 7.35–7.27 (m, 10H), 2.69–2.55 (m, 4H), 1.12 (d, *J* = 6.8 Hz, 6H), 1.00 (d, *J* = 6.6 Hz, 6H), 0.89 (d, *J* = 6.9 Hz, 6H), 0.83 (d, *J* = 6.5 Hz, 6H). <sup>31</sup>P NMR (CD<sub>2</sub>Cl<sub>2</sub>, 203 MHz): δ 2.94. ESI-HRMS: calculated for C<sub>56</sub>H<sub>52</sub>O<sub>4</sub>P<sup>-</sup> ([M-H]<sup>-</sup>): 819.3609, found: 819.3613. The analytical data matches those reported in the literature [7].

**(*R*)-2,6-bis(4-(*tert*-butyl)-2,6-diisopropylphenyl)-4-hydroxydinaphtho[2,1-*d*:1',2'-*f*][1,3,2]dioxaphosphepine 4-oxide ((*R*)-C6)**

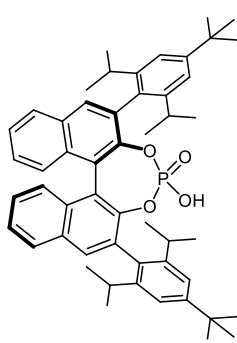

Starting from 71 mg (0.1 mmol) of the corresponding 3,3'-disubstituted BINOL (**S6** [5]), 68 mg of phosphoric acid (*R*)-**C6** are obtained (87% yield). <sup>1</sup>H NMR (CD<sub>2</sub>Cl<sub>2</sub>, 501 MHz): δ 7.90 (d, *J* = 7.9 Hz, 2H), 7.79 (s, 2H), 7.50 (t, *J* = 7.6 Hz, 2H), 7.30 (t, *J* = 7.6 Hz, 4H), 7.17–7.08 (m, 4H), 2.64–2.50 (m, 4H), 1.28 (s, 18H), 1.05 (br s, 6H), 0.98 (d, *J* = 6.9 Hz, 6H), 0.89 (d, *J* = 6.8 Hz, 6H), 0.74 (br s, 6H). <sup>31</sup>P NMR (CD<sub>2</sub>Cl<sub>2</sub>, 203 MHz): δ 2.64. ESI-HRMS: calculated for C<sub>52</sub>H<sub>60</sub>O<sub>4</sub>P<sup>-</sup> ([M-H]<sup>-</sup>): 779.4235, found: 779.4243. The analytical data matches those reported in the literature [8].

**(R)-2,6-bis(4-(anthracen-9-yl)-2,6-diisopropylphenyl)-4-hydroxydinaphtho[2,1-d:1',2'-f][1,3,2]dioxaphosphepine 4-oxide ((R)-C7)**

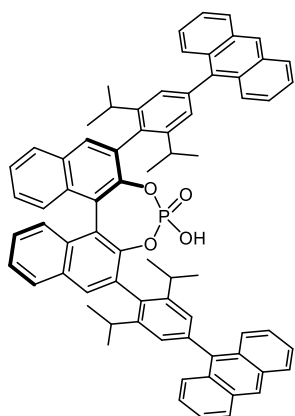

Starting from 60.0 mg (0.062 mmol) of the corresponding 3,3'-disubstituted BINOL (**S7**), 55.2 mg of phosphoric acid (**R-C7**) are obtained (86% yield).  $^1\text{H}$  NMR ( $\text{CD}_2\text{Cl}_2$ , 501 MHz):  $\delta$  8.42 (s, 2H), 8.07–8.02 (m, 6H), 7.89–7.64 (m, 8H), 7.58 (t,  $J = 7.5$  Hz, 2H), 7.46 (t,  $J = 7.4$  Hz, 2H), 7.40–7.35 (m, 4H), 7.32 (t,  $J = 7.7$  Hz, 2H), 7.27–7.11 (m, 6H), 2.84–2.72 (m, 4H), 1.08 (br s, 6H), 1.00 (br s, 6H), 0.92–0.80 (m, 12H).  $^{31}\text{P}$  NMR ( $\text{CD}_2\text{Cl}_2$ , 203 MHz):  $\delta$  3.81. ESI-HRMS: calculated for  $\text{C}_{72}\text{H}_{60}\text{O}_4\text{P}^-$  ( $[\text{M}-\text{H}]^-$ ): 1019.4235, found:

1019.4227. The analytical data matches those reported in the literature [3].



## 9. General Procedure for the CPA-catalyzed Epoxide Thionation

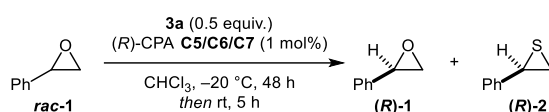

Following the previously reported procedure [9]: Styrene oxide *rac*-1 (0.05 mmol, 6.0 mg, 5.7  $\mu$ L) was weighed into a glass vial, and dissolved with 0.4 mL of dry CHCl<sub>3</sub>. The vial was cooled at -20 °C for 20 min, and then sulfur donor **3a** [9] (0.025 mmol, 4.1 mg, 0.50 equiv.) was added, followed by the addition of the CPA catalyst (**R**)-C5/C6/C7 (0.0025 mmol, 5 mol%, as 0.1 mL of a stock solution in dry CHCl<sub>3</sub>). Until the complete consumption of the sulfur donor, the reaction was then warmed up to room temperature and stirred for another five hours (to ensure all the intermediates were converted to the product). The crude <sup>1</sup>H NMR indicated an almost 1:1 ratio of the epoxide and thiirane product and both products in around 50% NMR yields (with Ph<sub>3</sub>CH as an internal standard). The reaction was then neutralized with Et<sub>3</sub>N (50  $\mu$ L) and concentrated under reduced pressure, leaving a residue which was subjected to preparative TLC on silica gel (eluted with pentane-MTBE 90:10 v/v mixture). The pure epoxide and thiirane product were obtained as a colorless liquids upon the removal of the eluent (used to extract the compounds from the scratched silica) under reduced pressure (400 mbar, in 40 °C water bath, 20–30 min), and kept in the freezer (-20 °C).

 (**R**)-1: Colorless liquid. <sup>1</sup>H NMR (500 MHz, CD<sub>2</sub>Cl<sub>2</sub>):  $\delta$  7.37–7.26 (m, 5H), 3.83 (dd, *J* = 4.1, 2.5 Hz, 1H), 3.11 (dd, *J* = 5.5, 4.1 Hz, 1H), 2.80 (dd, *J* = 5.5, 2.6 Hz, 1H). The enantiomeric ratio was determined by chiral GC analysis using a BGB-176 column (0.25 mm x 30 m): 70 °C for 40 min, *t*<sub>1</sub> = 33.4 min, *t*<sub>2</sub> = 35.8 min.

 (**R**)-2: Colorless liquid. <sup>1</sup>H NMR (500 MHz, CD<sub>2</sub>Cl<sub>2</sub>):  $\delta$  7.32–7.22 (m, 5H), 3.91 (dd, *J* = 6.6, 5.6 Hz, 1H), 2.87 (dd, *J* = 6.6, 1.6 Hz, 1H), 2.66 (dd, *J* = 5.6, 1.5 Hz, 1H). The enantiomeric ratio was determined by chiral GC analysis using a Hydrodex- $\beta$ -TBDAc column (0.4 mm x 25 m): 100 °C for 25 min, *t*<sub>1</sub> = 21.8 min, *t*<sub>2</sub> = 22.8 min.

The analytical data of both compounds matches those reported in the literature [9].

As shown in Table S1, catalysts (*R*)-**C5**, (*R*)-**C6** and (*R*)-**C7** were also tested for the epoxide thionation reaction with two racemic aliphatic substrates, namely 2-(*n*-hexyl)oxirane (commercially available) and 2-cyclohexyloxirane (prepared by epoxidation of vinylcyclohexane with *m*-CPBA, following a reported procedure [10]).

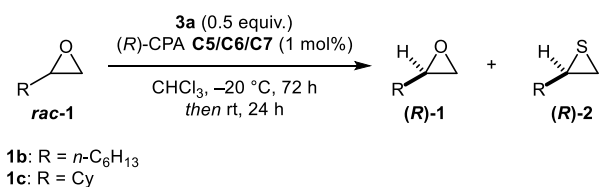

The analytical data of these aliphatic epoxides and thiiranes matches those reported in literature [9].

## 10.B3LYP Geometries for All the Optimized Compounds and Transition States

### 3a E= -801.328580760

|   |           |           |           |
|---|-----------|-----------|-----------|
| C | -1.130161 | 0.199574  | -0.084241 |
| C | 0.266501  | 0.267737  | -0.115155 |
| C | 0.933709  | 1.497522  | 0.021789  |
| C | 0.169951  | 2.649346  | 0.209877  |
| C | -1.225933 | 2.593496  | 0.245219  |
| C | -1.873195 | 1.365956  | 0.092357  |
| H | -1.627978 | -0.761411 | -0.190462 |
| H | 0.677726  | 3.604466  | 0.322974  |
| H | -1.802583 | 3.502152  | 0.390565  |
| H | -2.957736 | 1.311233  | 0.117527  |
| C | 2.440692  | 1.492375  | -0.082429 |
| H | 2.736784  | 1.575716  | -1.138906 |
| H | 2.868153  | 2.360199  | 0.431547  |
| C | 3.021098  | 0.194153  | 0.501530  |
| H | 4.097274  | 0.121032  | 0.338349  |
| H | 2.856103  | 0.175536  | 1.589501  |
| C | 2.356135  | -1.045418 | -0.066918 |
| S | 3.145266  | -2.484320 | -0.327463 |
| N | 1.026964  | -0.904492 | -0.306504 |
| H | 0.544583  | -1.742480 | -0.613716 |

### 4b E= -478.372673225

|   |           |           |           |
|---|-----------|-----------|-----------|
| C | -1.384581 | -1.495110 | 0.022402  |
| C | -0.309085 | -0.606903 | -0.086207 |
| C | -0.529514 | 0.782817  | -0.117986 |
| C | -1.838790 | 1.253494  | -0.016884 |
| C | -2.919030 | 0.374114  | 0.093195  |
| C | -2.686347 | -1.001968 | 0.106310  |
| H | -1.198801 | -2.566408 | 0.047290  |
| H | -2.013198 | 2.327096  | -0.033411 |

|   |           |           |           |
|---|-----------|-----------|-----------|
| H | -3.931133 | 0.760791  | 0.167486  |
| H | -3.516883 | -1.697296 | 0.190800  |
| C | 0.670600  | 1.683652  | -0.301835 |
| H | 0.890009  | 1.783717  | -1.375893 |
| H | 0.456437  | 2.692976  | 0.066217  |
| C | 1.905824  | 1.107254  | 0.406847  |
| H | 2.814970  | 1.666248  | 0.172739  |
| H | 1.766263  | 1.152028  | 1.496661  |
| C | 2.157000  | -0.351122 | 0.047659  |
| N | 1.009396  | -1.087679 | -0.180899 |
| H | 1.161586  | -2.079216 | -0.323290 |
| O | 3.263565  | -0.862943 | -0.007913 |

### III-R E= -1186.19585334

|   |          |           |           |
|---|----------|-----------|-----------|
| C | 3.331900 | 1.693330  | 0.873488  |
| C | 2.733753 | 0.492207  | 0.458295  |
| C | 3.365197 | -0.299361 | -0.522162 |
| C | 4.587428 | 0.130480  | -1.046013 |
| C | 5.185021 | 1.321534  | -0.634222 |
| C | 4.545600 | 2.103916  | 0.330523  |
| H | 2.840394 | 2.296899  | 1.633848  |
| H | 5.074327 | -0.485364 | -1.799822 |
| H | 6.134896 | 1.633694  | -1.058214 |
| H | 4.992931 | 3.036002  | 0.665615  |
| C | 2.692499 | -1.568310 | -1.004718 |
| H | 2.180311 | -1.379542 | -1.959769 |
| H | 3.442206 | -2.342055 | -1.208582 |
| C | 1.678457 | -2.093929 | 0.015700  |
| H | 1.070533 | -2.898720 | -0.404354 |
| H | 2.195422 | -2.484989 | 0.901138  |
| C | 0.747472 | -0.988418 | 0.512052  |

|                                |           |           |           |                               |           |           |           |
|--------------------------------|-----------|-----------|-----------|-------------------------------|-----------|-----------|-----------|
| S                              | -0.437839 | -0.382587 | -0.880824 | H                             | 1.698887  | 6.998672  | 0.078709  |
| N                              | 1.531644  | 0.079970  | 1.055827  | C                             | 0.373914  | 5.703686  | -1.033206 |
| H                              | 0.985063  | 0.834999  | 1.452366  | H                             | -0.056910 | 6.449638  | -1.704781 |
| C                              | -1.923500 | -0.939491 | 0.066791  | H                             | 1.217571  | 5.226219  | -1.547440 |
| C                              | -1.398394 | -0.956443 | 1.511101  | C                             | -0.662906 | 4.607826  | -0.790635 |
| H                              | -1.385109 | 0.064117  | 1.922419  | S                             | -2.325924 | 5.330274  | -0.145569 |
| H                              | -2.015570 | -1.584165 | 2.160592  | N                             | -0.116280 | 3.628373  | 0.102626  |
| O                              | -0.103873 | -1.535046 | 1.499103  | H                             | -0.736049 | 2.849041  | 0.289328  |
| H                              | -2.152593 | -1.967164 | -0.231779 | C                             | -3.276647 | 4.620766  | -1.573802 |
| C                              | -3.153135 | -0.078632 | -0.124592 | C                             | -2.321913 | 3.526658  | -2.082512 |
| C                              | -4.380759 | -0.687830 | -0.415257 | H                             | -2.428118 | 2.620631  | -1.467536 |
| C                              | -3.115137 | 1.315622  | 0.028353  | H                             | -2.513958 | 3.266030  | -3.126353 |
| C                              | -5.545552 | 0.071760  | -0.541603 | O                             | -0.990060 | 4.022132  | -2.033169 |
| H                              | -4.424406 | -1.766964 | -0.544463 | H                             | -4.166410 | 4.147663  | -1.147174 |
| C                              | -4.277058 | 2.075779  | -0.096185 | C                             | -3.708322 | 5.643262  | -2.603720 |
| H                              | -2.165305 | 1.805522  | 0.223259  | C                             | -5.030900 | 6.105293  | -2.600160 |
| C                              | -5.497220 | 1.456633  | -0.380441 | C                             | -2.825794 | 6.142682  | -3.574420 |
| H                              | -6.487650 | -0.419645 | -0.769578 | C                             | -5.465371 | 7.046558  | -3.535128 |
| H                              | -4.228865 | 3.155079  | 0.021972  | H                             | -5.727842 | 5.725898  | -1.855719 |
| H                              | -6.401116 | 2.051195  | -0.481741 | C                             | -3.260384 | 7.077830  | -4.513160 |
| <b>III-S E= -1186.19522471</b> |           |           |           | H                             | -1.797856 | 5.793924  | -3.592278 |
| C                              | 0.978712  | 3.037788  | 2.182911  | C                             | -4.580305 | 7.535866  | -4.496339 |
| C                              | 0.679732  | 3.996088  | 1.200582  | H                             | -6.495428 | 7.392632  | -3.513737 |
| C                              | 1.211824  | 5.296288  | 1.309280  | H                             | -2.564782 | 7.450941  | -5.260463 |
| C                              | 2.043855  | 5.592226  | 2.392516  | H                             | -4.915294 | 8.266444  | -5.227705 |
| C                              | 2.345024  | 4.642115  | 3.368054  | <b>II-R E= -3768.24197925</b> |           |           |           |
| C                              | 1.802463  | 3.359466  | 3.257275  | H                             | -0.434078 | -2.373528 | -2.423381 |
| H                              | 0.566749  | 2.034938  | 2.090293  | C                             | 0.276408  | -0.167182 | 3.332432  |
| H                              | 2.457019  | 6.596040  | 2.470996  | C                             | 0.273398  | -1.561411 | 3.437460  |
| H                              | 2.993362  | 4.897795  | 4.200988  | C                             | 0.825734  | -2.217999 | 4.548091  |
| H                              | 2.023014  | 2.603850  | 4.006679  | C                             | 1.368511  | -1.442773 | 5.572124  |
| C                              | 0.843365  | 6.342349  | 0.277591  | C                             | 1.370642  | -0.047750 | 5.487089  |
| H                              | 0.046132  | 6.990724  | 0.670320  | C                             | 0.830265  | 0.586687  | 4.366528  |

|   |           |           |           |   |           |           |           |
|---|-----------|-----------|-----------|---|-----------|-----------|-----------|
| H | -0.136794 | 0.303684  | 2.448238  | C | -0.684273 | 2.401130  | -0.026102 |
| H | 1.796693  | -1.936803 | 6.440916  | C | 1.746147  | 4.325033  | 2.081982  |
| H | 1.797576  | 0.540666  | 6.294078  | C | -0.701548 | 4.287790  | 2.035903  |
| H | 0.840636  | 1.669584  | 4.288185  | C | -1.939782 | 2.832436  | 0.501275  |
| C | 0.832839  | -3.727509 | 4.545271  | C | 1.713297  | 5.188868  | 3.155687  |
| H | 1.728129  | -4.097965 | 4.024802  | H | 2.699042  | 3.984195  | 1.693618  |
| H | 0.873644  | -4.122368 | 5.565405  | C | -0.700629 | 5.196368  | 3.129190  |
| C | -0.423753 | -4.251280 | 3.838643  | C | -1.914848 | 3.789717  | 1.495058  |
| H | -0.403567 | -5.338279 | 3.728058  | C | 0.479263  | 5.642256  | 3.679762  |
| H | -1.316497 | -4.001778 | 4.431462  | H | 2.644615  | 5.524638  | 3.604064  |
| C | -0.604789 | -3.592707 | 2.485481  | H | -1.656694 | 5.523213  | 3.531616  |
| N | -0.279829 | -2.328406 | 2.365541  | H | -2.854115 | 4.160211  | 1.897504  |
| H | -0.473880 | -1.761625 | 1.480083  | H | 0.466919  | 6.331639  | 4.519616  |
| C | -0.339028 | -3.903703 | -1.235837 | C | -3.240884 | 2.300372  | -0.023905 |
| C | -1.583185 | -3.710206 | -0.332458 | C | -3.669404 | 2.644471  | -1.330646 |
| H | 0.534204  | -3.462524 | -0.730904 | C | -4.067890 | 1.494783  | 0.794668  |
| H | -1.690221 | -2.650337 | -0.092273 | C | -4.904311 | 2.173376  | -1.785462 |
| C | 2.153178  | 1.270188  | -0.538664 | C | -5.297320 | 1.053450  | 0.287115  |
| C | 1.778695  | 2.599404  | -0.383447 | C | -5.736849 | 1.374388  | -0.996885 |
| C | 2.598793  | 3.619490  | -0.982169 | H | -5.227054 | 2.443921  | -2.787763 |
| C | 3.840860  | 3.241289  | -1.586392 | H | -5.937170 | 0.437825  | 0.916046  |
| C | 4.211838  | 1.872793  | -1.612869 | C | 3.831183  | -0.560947 | -1.191452 |
| C | 3.388171  | 0.874469  | -1.135759 | C | 4.457311  | -1.137321 | -0.060950 |
| H | 1.267835  | 5.294855  | -0.623928 | C | 3.692446  | -1.312619 | -2.382054 |
| C | 2.222832  | 4.991133  | -1.036050 | C | 4.935205  | -2.449455 | -0.142403 |
| C | 4.673030  | 4.239256  | -2.161922 | C | 4.188185  | -2.622833 | -2.407110 |
| H | 5.174949  | 1.604277  | -2.038567 | C | 4.811089  | -3.212513 | -1.306241 |
| C | 4.288820  | 5.560285  | -2.175951 | H | 5.425776  | -2.882719 | 0.726099  |
| C | 3.043562  | 5.933007  | -1.617391 | H | 4.083153  | -3.207274 | -3.317193 |
| H | 5.617200  | 3.932704  | -2.606103 | O | -0.700351 | 1.451672  | -1.028725 |
| H | 4.929409  | 6.313916  | -2.625768 | O | 1.339933  | 0.281926  | -0.011269 |
| H | 2.727374  | 6.972175  | -1.652376 | P | -0.119462 | -0.061308 | -0.722103 |
| C | 0.532116  | 2.950436  | 0.359927  | O | -0.917364 | -0.705671 | 0.402688  |
| C | 0.545719  | 3.858213  | 1.476198  | C | -2.855525 | 3.551638  | -2.253752 |

|   |           |           |           |   |           |           |           |
|---|-----------|-----------|-----------|---|-----------|-----------|-----------|
| H | -1.914060 | 3.795263  | -1.754648 | H | 2.769648  | -2.512541 | -4.898652 |
| C | -3.584228 | 4.888273  | -2.501203 | C | 4.139093  | -0.168901 | -4.594454 |
| H | -3.800409 | 5.403420  | -1.558148 | H | 4.824781  | -0.963968 | -4.913536 |
| H | -4.536028 | 4.737107  | -3.024136 | H | 4.735815  | 0.616354  | -4.119565 |
| H | -2.966756 | 5.552196  | -3.118457 | H | 3.675850  | 0.256825  | -5.493050 |
| C | -2.495437 | 2.857476  | -3.580994 | C | 5.331536  | -4.642574 | -1.382658 |
| H | -1.941339 | 1.932175  | -3.399519 | H | 5.139128  | -5.000508 | -2.403181 |
| H | -1.869885 | 3.516883  | -4.194974 | C | 6.851838  | -4.719536 | -1.146594 |
| H | -3.390519 | 2.613599  | -4.165862 | H | 7.211153  | -5.749199 | -1.264710 |
| C | -7.080601 | 0.872734  | -1.509580 | H | 7.115739  | -4.389192 | -0.134751 |
| H | -7.518924 | 0.254874  | -0.713155 | H | 7.394150  | -4.084817 | -1.855902 |
| C | -8.059141 | 2.031353  | -1.781436 | C | 4.575977  | -5.577295 | -0.418470 |
| H | -9.037878 | 1.647067  | -2.093821 | H | 4.926532  | -6.611487 | -0.523666 |
| H | -7.688456 | 2.686103  | -2.579107 | H | 3.498518  | -5.559595 | -0.617023 |
| H | -8.202632 | 2.645984  | -0.885880 | H | 4.729265  | -5.277433 | 0.625546  |
| C | -6.924841 | -0.020982 | -2.754887 | C | 4.669611  | -0.356501 | 1.235928  |
| H | -6.252030 | -0.863405 | -2.559204 | H | 4.121643  | 0.587033  | 1.158685  |
| H | -6.510546 | 0.541575  | -3.599756 | C | 4.110367  | -1.096068 | 2.464408  |
| H | -7.896666 | -0.422409 | -3.067624 | H | 4.650605  | -2.030265 | 2.660958  |
| C | -3.684274 | 1.083051  | 2.216575  | H | 3.052309  | -1.336873 | 2.322772  |
| H | -2.655526 | 1.406413  | 2.395938  | H | 4.197841  | -0.470470 | 3.360755  |
| C | -4.577627 | 1.775665  | 3.265058  | C | 6.156620  | -0.001189 | 1.433719  |
| H | -4.522028 | 2.867031  | 3.184259  | H | 6.539161  | 0.582687  | 0.589185  |
| H | -4.271156 | 1.494782  | 4.280477  | H | 6.772991  | -0.904301 | 1.520716  |
| H | -5.629095 | 1.489592  | 3.141630  | H | 6.296029  | 0.590592  | 2.347127  |
| C | -3.709489 | -0.445476 | 2.406042  | O | 0.027883  | -0.742825 | -2.042453 |
| H | -3.060732 | -0.925317 | 1.668466  | S | -1.312386 | -4.625328 | 1.298847  |
| H | -4.720947 | -0.855431 | 2.302581  | O | -0.565199 | -3.350720 | -2.498146 |
| H | -3.350922 | -0.706565 | 3.410241  | C | -2.880909 | -4.246695 | -0.895754 |
| C | 3.058162  | -0.729769 | -3.645661 | C | -2.971631 | -5.535766 | -1.439441 |
| H | 2.410705  | 0.097656  | -3.340672 | C | -4.027821 | -3.441691 | -0.866855 |
| C | 2.173043  | -1.735640 | -4.403795 | C | -4.183408 | -6.009521 | -1.941878 |
| H | 1.612998  | -1.212562 | -5.187562 | H | -2.091361 | -6.171457 | -1.485219 |
| H | 1.452644  | -2.221940 | -3.743092 | C | -5.239086 | -3.913659 | -1.373402 |

|                               |           |           |           |   |           |           |           |
|-------------------------------|-----------|-----------|-----------|---|-----------|-----------|-----------|
| H                             | -3.966635 | -2.435648 | -0.459381 | C | 0.453425  | 4.892488  | -1.441370 |
| C                             | -5.320703 | -5.199908 | -1.910174 | C | 1.666571  | 4.180384  | -1.264673 |
| H                             | -4.236986 | -7.009000 | -2.364944 | C | 1.702085  | 2.907704  | -0.734358 |
| H                             | -6.117606 | -3.274427 | -1.350825 | H | -2.930419 | 4.565951  | -0.987685 |
| H                             | -6.263301 | -5.567879 | -2.306395 | C | -1.983339 | 5.010131  | -1.269968 |
| H                             | -0.135582 | -4.973438 | -1.365385 | C | 0.436987  | 6.168043  | -2.068086 |
| <b>II-S E= -3768.23926980</b> |           |           |           | H | 2.594913  | 4.647312  | -1.583646 |
| H                             | 0.347278  | -2.454842 | -2.043486 | C | -0.746549 | 6.833712  | -2.288606 |
| C                             | -0.498484 | -0.431535 | 3.712986  | C | -1.968032 | 6.237702  | -1.895880 |
| C                             | 0.412393  | -1.482014 | 3.865840  | H | 1.382994  | 6.601156  | -2.384617 |
| C                             | 0.992695  | -1.777279 | 5.109806  | H | -0.748148 | 7.805182  | -2.775346 |
| C                             | 0.627564  | -1.003877 | 6.211112  | H | -2.905527 | 6.749804  | -2.095579 |
| C                             | -0.288294 | 0.042959  | 6.077303  | C | -1.977130 | 2.413803  | 0.226112  |
| C                             | -0.845742 | 0.328322  | 4.829385  | C | -2.779232 | 3.104275  | 1.200816  |
| H                             | -0.908065 | -0.222041 | 2.731101  | C | -2.389618 | 1.154289  | -0.191221 |
| H                             | 1.066553  | -1.223421 | 7.181342  | C | -2.357875 | 4.301527  | 1.844214  |
| H                             | -0.562655 | 0.634036  | 6.946267  | C | -4.045518 | 2.548491  | 1.575078  |
| H                             | -1.552166 | 1.145162  | 4.716808  | C | -3.664137 | 0.600061  | 0.137395  |
| C                             | 2.006307  | -2.894303 | 5.175622  | C | -3.154448 | 4.925851  | 2.779686  |
| H                             | 3.011415  | -2.506633 | 4.953699  | H | -1.387954 | 4.718368  | 1.598160  |
| H                             | 2.049145  | -3.326295 | 6.180597  | C | -4.851941 | 3.227823  | 2.528423  |
| C                             | 1.642121  | -3.985081 | 4.160747  | C | -4.469493 | 1.327506  | 0.989925  |
| H                             | 2.404659  | -4.765973 | 4.113630  | C | -4.420831 | 4.393551  | 3.119512  |
| H                             | 0.696721  | -4.464890 | 4.454833  | H | -2.805335 | 5.834769  | 3.262511  |
| C                             | 1.414888  | -3.387119 | 2.786660  | H | -5.816288 | 2.798588  | 2.790555  |
| N                             | 0.789563  | -2.237480 | 2.711213  | H | -5.456499 | 0.946593  | 1.239173  |
| H                             | 0.432343  | -1.827760 | 1.789058  | H | -5.043788 | 4.900528  | 3.851460  |
| C                             | 0.439604  | -3.952351 | -0.806121 | C | -4.140958 | -0.693143 | -0.456413 |
| C                             | 1.784514  | -3.517208 | -0.173549 | C | -4.459307 | -0.759145 | -1.836602 |
| H                             | 0.404039  | -5.045348 | -0.883202 | C | -4.329057 | -1.833696 | 0.359533  |
| C                             | 0.468857  | 2.340502  | -0.295072 | C | -4.950829 | -1.956959 | -2.362837 |
| C                             | -0.740371 | 3.022398  | -0.347303 | C | -4.831428 | -3.005526 | -0.221337 |
| C                             | -0.776612 | 4.304500  | -1.001874 | C | -5.144824 | -3.095950 | -1.576782 |
|                               |           |           |           | H | -5.192840 | -1.998985 | -3.421815 |

|   |           |           |           |   |           |           |           |
|---|-----------|-----------|-----------|---|-----------|-----------|-----------|
| H | -4.977160 | -3.883346 | 0.404647  | H | -3.501681 | -0.911456 | 2.100592  |
| C | 3.006136  | 2.174272  | -0.610899 | C | -5.285131 | -1.929563 | 2.709618  |
| C | 3.655863  | 2.096705  | 0.644409  | H | -5.962605 | -1.094499 | 2.499083  |
| C | 3.619673  | 1.617197  | -1.757247 | H | -5.038005 | -1.905003 | 3.778395  |
| C | 4.902726  | 1.469616  | 0.728297  | H | -5.836221 | -2.857477 | 2.514686  |
| C | 4.872146  | 1.003060  | -1.615837 | C | -3.033042 | -2.986600 | 2.222814  |
| C | 5.533517  | 0.915592  | -0.389621 | H | -2.120104 | -2.909522 | 1.626090  |
| H | 5.400778  | 1.424815  | 1.693925  | H | -3.475993 | -3.975453 | 2.055599  |
| H | 5.353837  | 0.588605  | -2.498736 | H | -2.763357 | -2.921213 | 3.284827  |
| O | -1.573323 | 0.429066  | -1.039388 | C | 2.991036  | 1.694706  | -3.149330 |
| O | 0.509544  | 1.088714  | 0.292122  | H | 1.964643  | 2.054313  | -3.034842 |
| P | -0.177936 | -0.223022 | -0.450978 | C | 2.903789  | 0.324187  | -3.846515 |
| O | -0.480611 | -1.172712 | 0.695743  | H | 2.410654  | 0.435661  | -4.820005 |
| C | -4.326797 | 0.441032  | -2.774655 | H | 2.316762  | -0.375708 | -3.247391 |
| H | -3.907105 | 1.276838  | -2.208911 | H | 3.894826  | -0.107978 | -4.032760 |
| C | -5.706002 | 0.901905  | -3.288039 | C | 3.743556  | 2.710626  | -4.033462 |
| H | -6.377121 | 1.149075  | -2.457427 | H | 4.782370  | 2.398841  | -4.198709 |
| H | -6.191935 | 0.124303  | -3.889307 | H | 3.765489  | 3.706920  | -3.577479 |
| H | -5.601054 | 1.793446  | -3.918471 | H | 3.260168  | 2.797133  | -5.014126 |
| C | -3.362981 | 0.159920  | -3.943257 | C | 6.907699  | 0.265048  | -0.288585 |
| H | -2.374592 | -0.127352 | -3.573535 | H | 7.144871  | -0.142116 | -1.281543 |
| H | -3.249937 | 1.057318  | -4.563869 | C | 7.998071  | 1.298736  | 0.055277  |
| H | -3.734149 | -0.644158 | -4.590267 | H | 8.989373  | 0.829124  | 0.067032  |
| C | -5.670815 | -4.395634 | -2.171760 | H | 7.826078  | 1.741273  | 1.043852  |
| H | -5.740491 | -5.121505 | -1.349482 | H | 8.014470  | 2.114394  | -0.675888 |
| C | -7.085017 | -4.230190 | -2.760301 | C | 6.929417  | -0.909842 | 0.707100  |
| H | -7.463258 | -5.189132 | -3.135227 | H | 7.916827  | -1.387408 | 0.718510  |
| H | -7.087023 | -3.522011 | -3.597511 | H | 6.186909  | -1.669759 | 0.440531  |
| H | -7.787046 | -3.856719 | -2.006421 | H | 6.714332  | -0.571247 | 1.727846  |
| C | -4.700788 | -4.975708 | -3.219067 | C | 3.060715  | 2.718076  | 1.907733  |
| H | -3.700247 | -5.117825 | -2.796879 | H | 2.063444  | 3.094815  | 1.664215  |
| H | -4.603105 | -4.307062 | -4.082409 | C | 2.886451  | 1.685447  | 3.036165  |
| H | -5.061407 | -5.944483 | -3.586408 | H | 3.849983  | 1.280397  | 3.369096  |
| C | -4.005339 | -1.850060 | 1.853875  | H | 2.260865  | 0.851912  | 2.702827  |



|                           |           |           |           |   |           |           |           |
|---------------------------|-----------|-----------|-----------|---|-----------|-----------|-----------|
| H                         | 2.402494  | 2.145585  | 3.906173  | C | -5.145786 | 3.138723  | 1.125466  |
| C                         | 3.895021  | 3.924678  | 2.381706  | H | -6.849929 | 0.190193  | 1.056207  |
| H                         | 3.973318  | 4.683999  | 1.595646  | H | -7.215840 | 2.600115  | 1.501414  |
| H                         | 4.913137  | 3.624073  | 2.657064  | H | -5.298897 | 4.190544  | 1.351049  |
| H                         | 3.434391  | 4.391998  | 3.261025  | C | -1.223818 | 1.730797  | -0.215044 |
| O                         | 0.616420  | -0.709616 | -1.622580 | C | -1.333067 | 2.779982  | -1.195108 |
| S                         | 2.041324  | -4.347983 | 1.498988  | C | -0.018137 | 1.596970  | 0.457007  |
| O                         | 0.323996  | -3.438996 | -2.101364 | C | -2.437326 | 2.898193  | -2.083962 |
| H                         | -0.377267 | -3.629010 | -0.145548 | C | -0.267490 | 3.729940  | -1.314066 |
| H                         | 1.764460  | -2.441441 | 0.005699  | C | 1.043018  | 2.543840  | 0.383257  |
| C                         | 3.005070  | -3.874961 | -0.993898 | C | -2.497018 | 3.914304  | -3.012575 |
| C                         | 3.276779  | -5.202202 | -1.355821 | H | -3.235483 | 2.166814  | -2.036223 |
| C                         | 3.877930  | -2.863104 | -1.412904 | C | -0.369369 | 4.778072  | -2.268849 |
| C                         | 4.404071  | -5.512981 | -2.115508 | C | 0.875457  | 3.604216  | -0.483718 |
| H                         | 2.601401  | -5.998901 | -1.052952 | C | -1.460944 | 4.873804  | -3.100662 |
| C                         | 5.000264  | -3.174177 | -2.182463 | H | -3.346504 | 3.976014  | -3.687265 |
| H                         | 3.666351  | -1.827945 | -1.159570 | H | 0.443677  | 5.496801  | -2.337302 |
| C                         | 5.269755  | -4.498751 | -2.530743 | H | 1.653573  | 4.359889  | -0.549430 |
| H                         | 4.601687  | -6.545809 | -2.389401 | H | -1.524436 | 5.674544  | -3.832232 |
| H                         | 5.660173  | -2.376801 | -2.512734 | C | 2.269566  | 2.433310  | 1.241298  |
| H                         | 6.144833  | -4.739662 | -3.128330 | C | 2.184448  | 2.714981  | 2.627559  |
|                           |           |           |           | C | 3.518655  | 2.105469  | 0.664977  |
|                           |           |           |           | C | 3.347818  | 2.666539  | 3.400664  |
|                           |           |           |           | C | 4.652570  | 2.079281  | 1.487359  |
|                           |           |           |           | C | 4.595271  | 2.352414  | 2.853740  |
|                           |           |           |           | H | 3.276592  | 2.888293  | 4.462593  |
|                           |           |           |           | H | 5.615779  | 1.831995  | 1.047097  |
|                           |           |           |           | C | -3.062839 | -2.973001 | -0.007033 |
|                           |           |           |           | C | -2.800253 | -3.525458 | -1.285223 |
|                           |           |           |           | C | -3.173513 | -3.823992 | 1.119421  |
|                           |           |           |           | C | -2.649927 | -4.909858 | -1.407067 |
|                           |           |           |           | C | -3.018824 | -5.204208 | 0.935643  |
|                           |           |           |           | C | -2.754099 | -5.770814 | -0.310796 |
|                           |           |           |           | H | -2.452423 | -5.327781 | -2.391314 |
| <b>IE= -3383.38015461</b> |           |           |           |   |           |           |           |
| C                         | -2.205764 | -0.561099 | 0.005197  |   |           |           |           |
| C                         | -2.364953 | 0.814071  | 0.078385  |   |           |           |           |
| C                         | -3.654128 | 1.324640  | 0.468359  |   |           |           |           |
| C                         | -4.746245 | 0.408187  | 0.607011  |   |           |           |           |
| C                         | -4.525361 | -0.977573 | 0.403843  |   |           |           |           |
| C                         | -3.273087 | -1.494669 | 0.142368  |   |           |           |           |
| H                         | -3.072675 | 3.401863  | 0.701348  |   |           |           |           |
| C                         | -3.893381 | 2.696809  | 0.758377  |   |           |           |           |
| C                         | -6.030525 | 0.899409  | 0.967497  |   |           |           |           |
| H                         | -5.369757 | -1.656382 | 0.485075  |   |           |           |           |
| C                         | -6.231773 | 2.236841  | 1.218555  |   |           |           |           |

|   |           |           |           |   |           |           |           |
|---|-----------|-----------|-----------|---|-----------|-----------|-----------|
| H | -3.102338 | -5.861956 | 1.797313  | H | 4.414233  | 0.192568  | -2.114251 |
| O | 0.153721  | 0.519088  | 1.331415  | C | -3.474211 | -3.306330 | 2.527701  |
| O | -0.949506 | -1.078303 | -0.312553 | H | -3.378644 | -2.216935 | 2.515979  |
| P | 0.296908  | -0.971648 | 0.718425  | C | -2.481315 | -3.830825 | 3.582287  |
| O | 1.550106  | -1.312385 | -0.008386 | H | -2.686334 | -3.363070 | 4.552715  |
| C | 0.874046  | 3.107889  | 3.310410  | H | -1.450640 | -3.597429 | 3.303925  |
| H | 0.074175  | 3.076973  | 2.565152  | H | -2.560244 | -4.915531 | 3.718874  |
| C | 0.930957  | 4.555072  | 3.839583  | C | -4.921165 | -3.642265 | 2.944796  |
| H | 1.160538  | 5.262979  | 3.035026  | H | -5.078025 | -4.727073 | 2.982958  |
| H | 1.699141  | 4.670160  | 4.613338  | H | -5.653593 | -3.227860 | 2.243123  |
| H | -0.031901 | 4.840718  | 4.280482  | H | -5.138229 | -3.236490 | 3.940387  |
| C | 0.486767  | 2.120872  | 4.428530  | C | -2.577629 | -7.276358 | -0.460009 |
| H | 0.407729  | 1.100866  | 4.040456  | H | -2.740912 | -7.720156 | 0.531548  |
| H | -0.481756 | 2.398553  | 4.862060  | C | -3.616401 | -7.891034 | -1.416890 |
| H | 1.224318  | 2.120537  | 5.239918  | H | -3.507230 | -8.981573 | -1.457905 |
| C | 5.854264  | 2.312676  | 3.709885  | H | -3.496632 | -7.506907 | -2.436911 |
| H | 6.681517  | 2.012178  | 3.052216  | H | -4.637365 | -7.662081 | -1.092152 |
| C | 6.200981  | 3.701670  | 4.280372  | C | -1.143793 | -7.636928 | -0.894996 |
| H | 7.140933  | 3.665277  | 4.844439  | H | -1.013966 | -8.725064 | -0.943402 |
| H | 5.418173  | 4.058557  | 4.960426  | H | -0.409224 | -7.233557 | -0.188828 |
| H | 6.310630  | 4.442329  | 3.480487  | H | -0.917072 | -7.227325 | -1.886715 |
| C | 5.753898  | 1.263968  | 4.833869  | C | -2.720920 | -2.670917 | -2.550558 |
| H | 5.538714  | 0.269021  | 4.429451  | H | -2.816803 | -1.620484 | -2.262294 |
| H | 4.955889  | 1.515365  | 5.542545  | C | -1.368037 | -2.820065 | -3.272071 |
| H | 6.693549  | 1.209565  | 5.397001  | H | -1.213456 | -3.843049 | -3.635308 |
| C | 3.686483  | 1.781768  | -0.819600 | H | -0.537556 | -2.565892 | -2.606622 |
| H | 2.689686  | 1.699494  | -1.262756 | H | -1.325720 | -2.152239 | -4.141199 |
| C | 4.433122  | 2.910524  | -1.558480 | C | -3.894232 | -2.979307 | -3.502737 |
| H | 3.916834  | 3.871591  | -1.454888 | H | -4.858976 | -2.825528 | -3.006146 |
| H | 4.515150  | 2.683491  | -2.628552 | H | -3.862539 | -4.017348 | -3.854408 |
| H | 5.448558  | 3.037029  | -1.163818 | H | -3.856258 | -2.326783 | -4.383627 |
| C | 4.386763  | 0.427969  | -1.042834 | O | -0.019496 | -1.826391 | 2.006611  |
| H | 3.849627  | -0.372036 | -0.526665 | H | 0.573665  | -2.641239 | 2.086338  |
| H | 5.423128  | 0.438023  | -0.685165 | C | 3.355523  | -3.271292 | -2.313114 |

|                               |           |           |           |   |           |           |           |
|-------------------------------|-----------|-----------|-----------|---|-----------|-----------|-----------|
| C                             | 3.150397  | -4.297671 | -1.384804 | H | 4.493032  | -1.460382 | 5.004260  |
| C                             | 3.519166  | -5.622273 | -1.670669 | C | 3.613648  | -2.611120 | 3.394367  |
| C                             | 4.123794  | -5.892693 | -2.898436 | H | 4.516562  | -3.047498 | 2.961067  |
| C                             | 4.345792  | -4.875826 | -3.830558 | H | 3.200887  | -3.348874 | 4.098577  |
| C                             | 3.954702  | -3.567731 | -3.536378 | C | 2.596363  | -2.445560 | 2.296036  |
| H                             | 3.044457  | -2.259850 | -2.070477 | N | 1.640584  | -1.559548 | 2.412196  |
| H                             | 4.418582  | -6.914287 | -3.127601 | H | 0.875912  | -1.400767 | 1.663603  |
| H                             | 4.818632  | -5.105281 | -4.781128 | C | 2.594820  | -3.125209 | -1.142605 |
| H                             | 4.118194  | -2.772443 | -4.257989 | C | 1.841699  | -3.449796 | 0.147434  |
| C                             | 3.195374  | -6.679811 | -0.642323 | H | 2.745711  | -2.044666 | -1.200837 |
| H                             | 2.177475  | -7.061465 | -0.813236 | H | 0.953832  | -2.827520 | 0.258190  |
| H                             | 3.871178  | -7.536635 | -0.738130 | O | 2.757070  | -3.271373 | 1.302163  |
| C                             | 3.284419  | -6.097188 | 0.775658  | S | 1.465545  | -3.571358 | -2.549524 |
| H                             | 2.941731  | -6.807853 | 1.529194  | H | 1.570109  | -4.504814 | 0.198841  |
| H                             | 4.332594  | -5.855602 | 1.008903  | C | 3.925029  | -3.836531 | -1.275930 |
| C                             | 2.498876  | -4.806980 | 0.915927  | C | 4.026486  | -5.232746 | -1.194974 |
| S                             | 1.706114  | -4.429105 | 2.352296  | C | 5.090340  | -3.089539 | -1.488802 |
| N                             | 2.529093  | -3.996097 | -0.149723 | C | 5.264103  | -5.864010 | -1.319095 |
| H                             | 2.122378  | -3.053835 | -0.062488 | H | 3.132631  | -5.833832 | -1.046526 |
| <b>IV-R E= -3768.24411627</b> |           |           |           | C | 6.330297  | -3.719155 | -1.613069 |
| H                             | 0.704016  | -2.453582 | -2.407692 | H | 5.021453  | -2.007054 | -1.568899 |
| C                             | 0.292174  | -0.083258 | 3.791585  | C | 6.421098  | -5.109076 | -1.526428 |
| C                             | 1.506645  | -0.739263 | 3.577742  | H | 5.324275  | -6.947497 | -1.258457 |
| C                             | 2.585498  | -0.601447 | 4.463380  | H | 7.223278  | -3.122767 | -1.780653 |
| C                             | 2.413045  | 0.193557  | 5.596834  | H | 7.384620  | -5.601935 | -1.624641 |
| C                             | 1.200158  | 0.844729  | 5.834774  | C | -0.194702 | 2.404677  | -0.578187 |
| C                             | 0.146084  | 0.710347  | 4.929214  | C | -1.512595 | 2.841723  | -0.621810 |
| H                             | -0.507462 | -0.190206 | 3.066602  | C | -1.826198 | 3.994496  | -1.425571 |
| H                             | 3.238846  | 0.306631  | 6.295024  | C | -0.755315 | 4.731053  | -2.027718 |
| H                             | 1.082484  | 1.459267  | 6.722511  | C | 0.579811  | 4.286096  | -1.852026 |
| H                             | -0.794661 | 1.223715  | 5.103334  | C | 0.884874  | 3.125839  | -1.171900 |
| C                             | 3.886662  | -1.282936 | 4.110728  | H | -3.985961 | 3.857003  | -1.278057 |
| H                             | 4.478436  | -0.631176 | 3.451156  | C | -3.157815 | 4.423373  | -1.687184 |
|                               |           |           |           | C | -1.048126 | 5.882148  | -2.808061 |

|   |           |           |           |   |           |           |           |
|---|-----------|-----------|-----------|---|-----------|-----------|-----------|
| H | 1.384356  | 4.869805  | -2.291737 | C | 5.015195  | 1.886976  | -0.772570 |
| C | -2.347149 | 6.281838  | -3.021496 | H | 4.888481  | 2.750622  | 1.190841  |
| C | -3.410195 | 5.533289  | -2.463888 | H | 4.817637  | 1.166475  | -2.778115 |
| H | -0.220306 | 6.433566  | -3.247880 | O | -1.885907 | 0.071702  | -0.930598 |
| H | -2.559571 | 7.158859  | -3.626813 | O | 0.108313  | 1.263124  | 0.143206  |
| H | -4.437399 | 5.832485  | -2.654607 | P | -0.339666 | -0.221947 | -0.441995 |
| C | -2.575778 | 2.102530  | 0.121860  | O | -0.346955 | -1.109369 | 0.799078  |
| C | -3.434529 | 2.762635  | 1.069046  | C | -4.747249 | -0.703181 | -2.341763 |
| C | -2.759279 | 0.742563  | -0.095673 | H | -4.480704 | 0.274010  | -1.930559 |
| C | -3.220524 | 4.097964  | 1.511899  | C | -6.228524 | -0.619374 | -2.761970 |
| C | -4.538829 | 2.039252  | 1.625414  | H | -6.873998 | -0.406464 | -1.902090 |
| C | -3.869492 | 0.010967  | 0.424340  | H | -6.573106 | -1.557662 | -3.212880 |
| C | -4.065996 | 4.690563  | 2.424716  | H | -6.372369 | 0.177710  | -3.501642 |
| H | -2.369434 | 4.649946  | 1.129979  | C | -3.834561 | -0.944639 | -3.559170 |
| C | -5.402924 | 2.685316  | 2.550769  | H | -2.782715 | -0.957695 | -3.259717 |
| C | -4.745563 | 0.687528  | 1.248218  | H | -3.970133 | -0.146970 | -4.299947 |
| C | -5.177402 | 3.984803  | 2.943233  | H | -4.063861 | -1.896765 | -4.052980 |
| H | -3.874818 | 5.709214  | 2.751777  | C | -4.996712 | -5.565897 | -0.968761 |
| H | -6.243140 | 2.123873  | 2.952912  | H | -4.809179 | -6.162399 | -0.064940 |
| H | -5.615668 | 0.165664  | 1.638287  | C | -6.475867 | -5.764523 | -1.351136 |
| H | -5.841613 | 4.466186  | 3.655922  | H | -6.687835 | -6.823406 | -1.543801 |
| C | -4.114143 | -1.424242 | 0.058729  | H | -6.730721 | -5.203870 | -2.258359 |
| C | -4.538806 | -1.755536 | -1.252496 | H | -7.141079 | -5.422535 | -0.550486 |
| C | -3.979386 | -2.444936 | 1.029040  | C | -4.064260 | -6.098445 | -2.073542 |
| C | -4.813889 | -3.091207 | -1.560120 | H | -3.011775 | -5.987245 | -1.791033 |
| C | -4.276644 | -3.765320 | 0.666978  | H | -4.213551 | -5.557467 | -3.015435 |
| C | -4.690735 | -4.115770 | -0.617497 | H | -4.258446 | -7.160875 | -2.265499 |
| H | -5.141489 | -3.335903 | -2.567719 | C | -3.522205 | -2.173048 | 2.462735  |
| H | -4.177637 | -4.551357 | 1.412626  | H | -3.211713 | -1.126155 | 2.523511  |
| C | 2.309353  | 2.669850  | -1.034073 | C | -4.672049 | -2.375987 | 3.469503  |
| C | 3.012220  | 2.931717  | 0.167090  | H | -5.527299 | -1.730487 | 3.240325  |
| C | 2.965286  | 2.031310  | -2.112011 | H | -4.338647 | -2.147526 | 4.489645  |
| C | 4.348724  | 2.535164  | 0.272032  | H | -5.029287 | -3.412809 | 3.458830  |
| C | 4.305673  | 1.652528  | -1.950932 | C | -2.300671 | -3.027027 | 2.852685  |

|   |           |           |           |                               |           |                     |
|---|-----------|-----------|-----------|-------------------------------|-----------|---------------------|
| H | -1.488081 | -2.869903 | 2.138739  |                               |           |                     |
| H | -2.541290 | -4.096478 | 2.880195  | <b>IV-S E= -3768.24526049</b> |           |                     |
| H | -1.946582 | -2.744880 | 3.852778  | H                             | -1.497409 | -0.966058 -2.758950 |
| C | 2.284553  | 1.797543  | -3.461164 | C                             | 0.065026  | -1.643344 3.393359  |
| H | 1.206569  | 1.912016  | -3.315987 | C                             | 0.012391  | -2.914352 2.815553  |
| C | 2.506385  | 0.383022  | -4.024161 | C                             | 0.368448  | -4.064542 3.536447  |
| H | 1.945858  | 0.266873  | -4.959558 | C                             | 0.760434  | -3.917565 4.867288  |
| H | 2.146068  | -0.370847 | -3.321897 | C                             | 0.806584  | -2.655846 5.464321  |
| H | 3.560838  | 0.187331  | -4.254400 | C                             | 0.463804  | -1.522907 4.724911  |
| C | 2.739926  | 2.859067  | -4.485068 | H                             | -0.195618 | -0.776203 2.796316  |
| H | 3.818061  | 2.783787  | -4.674408 | H                             | 1.034662  | -4.801184 5.438518  |
| H | 2.535418  | 3.876997  | -4.135942 | H                             | 1.113123  | -2.559887 6.501826  |
| H | 2.220256  | 2.717820  | -5.440563 | H                             | 0.506358  | -0.538101 5.180161  |
| C | 6.474984  | 1.468250  | -0.645788 | C                             | 0.347189  | -5.394666 2.821191  |
| H | 6.746006  | 0.955289  | -1.579039 | H                             | 1.309961  | -5.561205 2.315500  |
| C | 7.409033  | 2.685387  | -0.502900 | H                             | 0.216543  | -6.219248 3.528658  |
| H | 8.459067  | 2.369407  | -0.470717 | C                             | -0.780996 | -5.415331 1.783358  |
| H | 7.199107  | 3.241444  | 0.418689  | H                             | -0.735217 | -6.288672 1.129445  |
| H | 7.286015  | 3.376865  | -1.343457 | H                             | -1.760282 | -5.430228 2.283943  |
| C | 6.694728  | 0.469314  | 0.506522  | C                             | -0.749281 | -4.177509 0.926774  |
| H | 7.743254  | 0.149979  | 0.550193  | N                             | -0.395345 | -3.028385 1.445020  |
| H | 6.072682  | -0.424473 | 0.379846  | H                             | -0.466893 | -2.085423 0.922626  |
| H | 6.444740  | 0.919745  | 1.475154  | C                             | -2.534416 | -2.629566 -1.383091 |
| C | 2.372224  | 3.706513  | 1.319206  | C                             | -1.190879 | -3.365552 -1.377136 |
| H | 1.290194  | 3.716416  | 1.160164  | C                             | 2.414540  | 1.401272 -0.340232  |
| C | 2.613502  | 3.060778  | 2.693949  | C                             | 2.081088  | 2.740640 -0.189228  |
| H | 3.672148  | 3.081235  | 2.979884  | C                             | 2.914554  | 3.727774 -0.824708  |
| H | 2.275892  | 2.020148  | 2.703209  | C                             | 4.127749  | 3.305386 -1.458891  |
| H | 2.058042  | 3.602535  | 3.468589  | C                             | 4.461012  | 1.926805 -1.476545  |
| C | 2.845969  | 5.174436  | 1.311072  | C                             | 3.621425  | 0.961395 -0.962082  |
| H | 2.610158  | 5.661255  | 0.358438  | H                             | 1.642203  | 5.444304 -0.453221  |
| H | 3.930975  | 5.238612  | 1.459638  | C                             | 2.575277  | 5.108294 -0.889717  |
| H | 2.360331  | 5.743971  | 2.113338  | C                             | 4.968860  | 4.270924 -2.075439  |
| O | 0.439304  | -0.629638 | -1.649014 | H                             | 5.400980  | 1.624849 -1.931079  |

|   |           |           |           |   |           |           |           |
|---|-----------|-----------|-----------|---|-----------|-----------|-----------|
| C | 4.620318  | 5.601637  | -2.100475 | H | 5.238488  | -2.958537 | 0.977973  |
| C | 3.403282  | 6.017684  | -1.511218 | H | 4.192098  | -3.127263 | -3.162703 |
| H | 5.890566  | 3.931366  | -2.542262 | O | -0.457782 | 1.654282  | -0.747134 |
| H | 5.267309  | 6.329914  | -2.581852 | O | 1.579675  | 0.439721  | 0.205406  |
| H | 3.114733  | 7.064569  | -1.553936 | P | 0.128910  | 0.130740  | -0.528216 |
| C | 0.867270  | 3.129489  | 0.588744  | O | -0.677427 | -0.601887 | 0.537777  |
| C | 0.941702  | 4.051562  | 1.691060  | C | -2.617625 | 3.850376  | -1.865590 |
| C | -0.373721 | 2.600456  | 0.256524  | H | -1.649552 | 4.062219  | -1.404140 |
| C | 2.172880  | 4.509263  | 2.238414  | C | -3.329720 | 5.206373  | -2.046604 |
| C | -0.273649 | 4.511115  | 2.294513  | H | -3.486055 | 5.704236  | -1.082715 |
| C | -1.598017 | 3.062128  | 0.828343  | H | -4.310529 | 5.085285  | -2.521748 |
| C | 2.198619  | 5.393968  | 3.294602  | H | -2.731463 | 5.872147  | -2.680763 |
| H | 3.103798  | 4.143760  | 1.820633  | C | -2.332320 | 3.185104  | -3.225133 |
| C | -0.213091 | 5.438286  | 3.370105  | H | -1.795622 | 2.241471  | -3.091425 |
| C | -1.516229 | 4.026761  | 1.811316  | H | -1.715711 | 3.845085  | -3.847606 |
| C | 0.995293  | 5.876499  | 3.861312  | H | -3.256910 | 2.978962  | -3.777588 |
| H | 3.153113  | 5.721288  | 3.698257  | C | -6.838767 | 1.198193  | -1.006682 |
| H | -1.146464 | 5.786590  | 3.806476  | H | -7.263195 | 0.592598  | -0.193365 |
| H | -2.432192 | 4.419961  | 2.244778  | C | -7.812223 | 2.363715  | -1.265427 |
| H | 1.028898  | 6.580846  | 4.688100  | H | -8.802087 | 1.985434  | -1.548908 |
| C | -2.928935 | 2.558867  | 0.351106  | H | -7.456972 | 3.006509  | -2.079719 |
| C | -3.407077 | 2.935945  | -0.928669 | H | -7.927701 | 2.989509  | -0.373335 |
| C | -3.732224 | 1.748768  | 1.187541  | C | -6.718889 | 0.289335  | -2.245181 |
| C | -4.665556 | 2.489625  | -1.341365 | H | -6.045547 | -0.553275 | -2.056105 |
| C | -4.989460 | 1.337765  | 0.725188  | H | -6.320705 | 0.840764  | -3.105032 |
| C | -5.476026 | 1.686817  | -0.534094 | H | -7.700887 | -0.109049 | -2.529204 |
| H | -5.024200 | 2.779819  | -2.325745 | C | -3.289874 | 1.302174  | 2.581359  |
| H | -5.612641 | 0.719694  | 1.368154  | H | -2.237847 | 1.574935  | 2.704331  |
| C | 3.991545  | -0.492691 | -1.015300 | C | -4.089463 | 2.023483  | 3.685015  |
| C | 4.491511  | -1.127984 | 0.146964  | H | -3.981730 | 3.111469  | 3.614505  |
| C | 3.883428  | -1.218139 | -2.224996 | H | -3.744763 | 1.712937  | 4.679423  |
| C | 4.852804  | -2.477181 | 0.082096  | H | -5.159225 | 1.792363  | 3.613658  |
| C | 4.268033  | -2.565667 | -2.234605 | C | -3.380338 | -0.225363 | 2.759940  |
| C | 4.746686  | -3.218349 | -1.098185 | H | -2.802852 | -0.731957 | 1.981384  |

|   |           |           |           |                                |           |           |           |
|---|-----------|-----------|-----------|--------------------------------|-----------|-----------|-----------|
| H | -4.417038 | -0.580557 | 2.717197  | H                              | -0.356797 | -2.666265 | -1.292816 |
| H | -2.974998 | -0.518918 | 3.736350  | H                              | -1.070116 | -3.972005 | -2.273581 |
| C | 3.408012  | -0.576284 | -3.528924 | C                              | -3.737120 | -3.540699 | -1.249109 |
| H | 2.941791  | 0.381150  | -3.280472 | C                              | -4.658954 | -3.320289 | -0.217593 |
| C | 2.339709  | -1.408413 | -4.261496 | C                              | -3.956507 | -4.608538 | -2.132011 |
| H | 1.998843  | -0.866861 | -5.152299 | C                              | -5.771245 | -4.151231 | -0.064205 |
| H | 1.475892  | -1.572208 | -3.614156 | H                              | -4.508258 | -2.484709 | 0.462087  |
| H | 2.728621  | -2.376597 | -4.600602 | C                              | -5.065668 | -5.439649 | -1.979354 |
| C | 4.603965  | -0.291397 | -4.461544 | H                              | -3.264266 | -4.783336 | -2.951479 |
| H | 5.108988  | -1.222001 | -4.749230 | C                              | -5.976126 | -5.215218 | -0.943299 |
| H | 5.348516  | 0.354267  | -3.982678 | H                              | -6.478073 | -3.962838 | 0.739660  |
| H | 4.265552  | 0.204802  | -5.379403 | H                              | -5.222486 | -6.261085 | -2.673510 |
| C | 5.142368  | -4.688806 | -1.153885 | H                              | -6.841591 | -5.862101 | -0.827129 |
| H | 4.980698  | -5.027668 | -2.186345 | O                              | -1.114011 | -4.382135 | -0.306307 |
| C | 6.632797  | -4.899984 | -0.826926 | S                              | -2.626052 | -1.692455 | -2.985610 |
| H | 6.907883  | -5.957187 | -0.927598 |                                |           |           |           |
| H | 6.862331  | -4.591954 | 0.200087  |                                |           |           |           |
| H | 7.269984  | -4.315748 | -1.499637 | <b>(R)-1 E= -384.838385433</b> |           |           |           |
| C | 4.251284  | -5.554596 | -0.241987 | C                              | 0.636528  | 0.539994  | -0.074112 |
| H | 4.512421  | -6.616093 | -0.334122 | C                              | 0.980021  | 1.929960  | 0.293241  |
| H | 3.193068  | -5.438673 | -0.503854 | H                              | 1.100265  | 2.180239  | 1.347512  |
| H | 4.370385  | -5.271100 | 0.811086  | H                              | 1.533457  | 2.557075  | -0.407055 |
| C | 4.697286  | -0.375642 | 1.461870  | O                              | -0.346692 | 1.583123  | -0.107665 |
| H | 4.319557  | 0.642551  | 1.333987  | H                              | 0.951865  | 0.196378  | -1.061554 |
| C | 3.908774  | -1.003605 | 2.624868  | C                              | 0.470422  | -0.534481 | 0.948314  |
| H | 4.247536  | -2.023814 | 2.843345  | C                              | 1.206427  | -1.720848 | 0.839349  |
| H | 2.840259  | -1.040983 | 2.394058  | C                              | -0.405563 | -0.369632 | 2.028820  |
| H | 4.039460  | -0.410865 | 3.538722  | C                              | 1.083918  | -2.720582 | 1.805226  |
| C | 6.195822  | -0.257072 | 1.805084  | H                              | 1.878211  | -1.862047 | -0.004852 |
| H | 6.748481  | 0.235835  | 0.997392  | C                              | -0.530199 | -1.370744 | 2.991729  |
| H | 6.649740  | -1.242274 | 1.966521  | H                              | -0.997948 | 0.538282  | 2.090910  |
| H | 6.335851  | 0.329998  | 2.721180  | C                              | 0.216007  | -2.547309 | 2.885325  |
| O | 0.274628  | -0.483744 | -1.884680 | H                              | 1.661466  | -3.636360 | 1.710568  |
| H | -2.539078 | -1.891760 | -0.578084 | H                              | -1.216405 | -1.235451 | 3.823717  |
|   |           |           |           | H                              | 0.116241  | -3.327257 | 3.635408  |

**(R)-2 E= -707.829278605**

|   |           |           |           |
|---|-----------|-----------|-----------|
| C | 2.167104  | -0.061089 | 1.097392  |
| C | 1.214996  | -0.725380 | 0.167760  |
| H | 1.800679  | 0.788911  | 1.669105  |
| H | 2.886901  | -0.682235 | 1.626307  |
| H | 1.367910  | -1.794028 | 0.031137  |
| C | -0.214615 | -0.309623 | 0.061621  |
| C | -0.616417 | 1.033269  | 0.126714  |
| C | -1.195827 | -1.299900 | -0.080671 |
| C | -1.966548 | 1.370716  | 0.068020  |
| H | 0.135144  | 1.814927  | 0.196010  |
| C | -2.549269 | -0.962000 | -0.141405 |
| H | -0.897076 | -2.344097 | -0.140486 |
| C | -2.939221 | 0.374828  | -0.064328 |
| H | -2.261679 | 2.415507  | 0.118057  |
| H | -3.295461 | -1.744385 | -0.251292 |
| H | -3.991310 | 0.642031  | -0.113549 |
| S | 2.553354  | 0.273653  | -0.659119 |

**(R)-3-TS1-R E= -3522.67900972**

|   |           |           |           |
|---|-----------|-----------|-----------|
| H | 0.175879  | -1.815606 | -2.227237 |
| C | -0.458696 | 1.078136  | 3.361154  |
| C | -0.613638 | -0.237787 | 3.811646  |
| C | -0.517135 | -0.553144 | 5.177170  |
| C | -0.284231 | 0.480490  | 6.084694  |
| C | -0.135521 | 1.799632  | 5.649015  |
| C | -0.217909 | 2.093558  | 4.285896  |
| H | -0.522974 | 1.288399  | 2.298885  |
| H | -0.213687 | 0.245929  | 7.144603  |
| H | 0.046672  | 2.591583  | 6.369978  |
| H | -0.097017 | 3.114766  | 3.935821  |
| C | -0.638113 | -2.005880 | 5.569169  |
| H | 0.346169  | -2.493374 | 5.499160  |

|   |           |           |           |
|---|-----------|-----------|-----------|
| H | -0.962186 | -2.104062 | 6.611171  |
| C | -1.624427 | -2.726325 | 4.639120  |
| H | -1.652101 | -3.800790 | 4.826963  |
| H | -2.641021 | -2.341429 | 4.812369  |
| C | -1.311525 | -2.491095 | 3.171663  |
| N | -0.848087 | -1.270113 | 2.870160  |
| H | -0.697423 | -1.021574 | 1.880376  |
| C | -0.037685 | -3.496749 | -1.074415 |
| C | -1.404114 | -3.003385 | -0.936394 |
| H | 0.709039  | -3.037826 | -0.428561 |
| H | -1.483639 | -1.996928 | -0.536882 |
| C | 2.616067  | 1.676976  | -0.743505 |
| C | 2.236357  | 2.998593  | -0.928706 |
| C | 3.071559  | 3.848128  | -1.732195 |
| C | 4.315613  | 3.330562  | -2.220519 |
| C | 4.679344  | 1.993672  | -1.924509 |
| C | 3.853447  | 1.144043  | -1.213299 |
| H | 1.747751  | 5.564561  | -1.781409 |
| C | 2.703734  | 5.170208  | -2.106369 |
| C | 5.156946  | 4.164044  | -3.007133 |
| H | 5.641174  | 1.627950  | -2.274499 |
| C | 4.779802  | 5.446423  | -3.332760 |
| C | 3.533825  | 5.946453  | -2.885708 |
| H | 6.103308  | 3.759946  | -3.358973 |
| H | 5.428107  | 6.071082  | -3.941123 |
| H | 3.225710  | 6.950744  | -3.163880 |
| C | 0.955144  | 3.478589  | -0.329156 |
| C | 0.911976  | 4.575006  | 0.599396  |
| C | -0.224940 | 2.809710  | -0.623586 |
| C | 2.077951  | 5.236530  | 1.076169  |
| C | -0.358786 | 4.999236  | 1.109750  |
| C | -1.500105 | 3.214276  | -0.123649 |
| C | 1.989124  | 6.277390  | 1.974802  |
| H | 3.050692  | 4.905655  | 0.731875  |



|   |           |           |           |   |           |           |           |
|---|-----------|-----------|-----------|---|-----------|-----------|-----------|
| C | -0.416934 | 6.087954  | 2.023219  | H | -1.708656 | -5.622663 | -1.729401 |
| C | -1.533777 | 4.313746  | 0.713698  | C | -5.009890 | -3.571891 | -1.749490 |
| C | 0.730127  | 6.718681  | 2.447122  | H | -3.812462 | -1.915767 | -1.071241 |
| H | 2.895875  | 6.761332  | 2.327514  | C | -5.008628 | -4.917385 | -2.127103 |
| H | -1.390635 | 6.405780  | 2.388827  | H | -3.822032 | -6.698463 | -2.411140 |
| H | -2.491155 | 4.665455  | 1.089225  | H | -5.932828 | -3.000014 | -1.751834 |
| H | 0.673806  | 7.545930  | 3.149332  | H | -5.936788 | -5.396457 | -2.427041 |
| C | -2.750801 | 2.484238  | -0.457571 | H | 0.133723  | -4.559878 | -1.231082 |
| C | -3.058507 | 2.081624  | -1.768094 | H | -3.467565 | 2.487965  | 1.575926  |
| C | -3.689562 | 2.207729  | 0.550060  | H | -2.350966 | 2.270612  | -2.567439 |
| C | -4.257149 | 1.434638  | -2.053773 | H | 3.705696  | -0.293470 | 1.125026  |
| C | -4.887484 | 1.560034  | 0.262829  | H | 4.896259  | -0.606033 | -2.990664 |
| C | -5.199430 | 1.158685  | -1.046808 | C | -6.475528 | 0.464647  | -1.355678 |
| H | -4.455838 | 1.118389  | -3.074081 | C | -7.157727 | 0.705582  | -2.561503 |
| H | -5.598791 | 1.379422  | 1.063903  | C | -7.039079 | -0.453231 | -0.450659 |
| C | 4.255167  | -0.264126 | -0.961810 | C | -8.354546 | 0.052430  | -2.853326 |
| C | 4.130449  | -0.861011 | 0.304416  | H | -6.757641 | 1.430722  | -3.264423 |
| C | 4.823099  | -1.029628 | -1.993045 | C | -8.237829 | -1.105738 | -0.741030 |
| C | 4.563778  | -2.164591 | 0.526352  | H | -6.521996 | -0.672716 | 0.479367  |
| C | 5.252971  | -2.334749 | -1.769937 | C | -8.900942 | -0.856977 | -1.945025 |
| C | 5.134640  | -2.932164 | -0.504114 | H | -8.866312 | 0.261852  | -3.789039 |
| H | 4.487611  | -2.584276 | 1.525685  | H | -8.651170 | -1.812817 | -0.026304 |
| H | 5.653324  | -2.911142 | -2.599328 | H | -9.835108 | -1.363779 | -2.171378 |
| O | -0.168857 | 1.699596  | -1.449587 | C | 5.592166  | -4.323896 | -0.263786 |
| O | 1.762035  | 0.831579  | -0.051617 | C | 6.743993  | -4.825893 | -0.894728 |
| P | 0.406268  | 0.290006  | -0.815531 | C | 4.887329  | -5.179327 | 0.601333  |
| O | -0.494666 | -0.265015 | 0.251089  | C | 7.174040  | -6.133190 | -0.670830 |
| O | 0.762634  | -0.563570 | -2.015519 | H | 7.320695  | -4.175298 | -1.546221 |
| S | -1.604319 | -3.687575 | 2.024891  | C | 5.317686  | -6.486247 | 0.827376  |
| O | -0.242930 | -2.801166 | -2.323684 | H | 3.980501  | -4.822751 | 1.081994  |
| C | -2.614470 | -3.690433 | -1.353587 | C | 6.463055  | -6.970174 | 0.191757  |
| C | -2.627473 | -5.045240 | -1.735148 | H | 8.072178  | -6.495445 | -1.164452 |
| C | -3.819372 | -2.961766 | -1.365384 | H | 4.751710  | -7.130379 | 1.495493  |
| C | -3.818164 | -5.652269 | -2.119333 | H | 6.798471  | -7.988752 | 0.367430  |

**(R)-3-TS1-S E= -3522.67630518**

|   |           |           |           |   |           |           |           |
|---|-----------|-----------|-----------|---|-----------|-----------|-----------|
| H | 0.484100  | -1.722275 | -2.150723 | H | 5.590097  | 2.606610  | -1.726801 |
| C | -1.403783 | 1.183152  | 3.178270  | C | 4.172070  | 6.215842  | -2.910281 |
| C | -2.132185 | 0.005902  | 3.385294  | C | 2.819400  | 6.483590  | -2.592912 |
| C | -2.806287 | -0.226402 | 4.595901  | H | 5.769483  | 4.791041  | -2.787429 |
| C | -2.759683 | 0.757491  | 5.583762  | H | 4.755794  | 6.949431  | -3.459596 |
| C | -2.049526 | 1.944035  | 5.383861  | H | 2.366755  | 7.418848  | -2.911287 |
| C | -1.368206 | 2.150270  | 4.182180  | C | 0.475850  | 3.584503  | -0.283879 |
| H | -0.872375 | 1.324150  | 2.243263  | C | 0.129981  | 4.661942  | 0.603252  |
| H | -3.283707 | 0.587922  | 6.521853  | C | -0.527409 | 2.718395  | -0.694834 |
| H | -2.026613 | 2.700278  | 6.163374  | C | 1.098284  | 5.514757  | 1.202836  |
| H | -0.811183 | 3.067897  | 4.017256  | C | -1.248397 | 4.863284  | 0.943674  |
| C | -3.509751 | -1.551459 | 4.764525  | C | -1.906512 | 2.908891  | -0.377975 |
| H | -2.802515 | -2.300943 | 5.150965  | C | 0.723260  | 6.525840  | 2.060861  |
| H | -4.317004 | -1.474494 | 5.501264  | H | 2.148103  | 5.354688  | 0.986217  |
| C | -4.068747 | -2.033168 | 3.418690  | C | -1.602727 | 5.926737  | 1.818646  |
| H | -4.482914 | -3.040165 | 3.487392  | C | -2.232872 | 3.988399  | 0.419687  |
| H | -4.885165 | -1.366486 | 3.100720  | C | -0.641176 | 6.744765  | 2.366080  |
| C | -3.025575 | -2.001036 | 2.315435  | H | 1.483707  | 7.158657  | 2.510503  |
| N | -2.164662 | -0.976427 | 2.364682  | H | -2.653793 | 6.072673  | 2.056646  |
| H | -1.514780 | -0.830504 | 1.577817  | H | -3.275895 | 4.172878  | 0.663714  |
| C | -1.380844 | -2.574694 | -1.900545 | H | -0.924152 | 7.550211  | 3.038278  |
| C | -0.718470 | -3.245996 | -0.786136 | C | -2.953256 | 1.973075  | -0.865351 |
| H | -2.051303 | -3.146362 | -2.539501 | C | -3.014587 | 1.564348  | -2.208517 |
| C | 2.470301  | 2.108501  | -0.493691 | C | -3.932643 | 1.486372  | 0.015093  |
| C | 1.879518  | 3.341149  | -0.734114 | C | -4.013543 | 0.699987  | -2.647293 |
| C | 2.625477  | 4.329828  | -1.464520 | C | -4.925622 | 0.614098  | -0.424295 |
| C | 3.983530  | 4.045231  | -1.823236 | C | -4.985410 | 0.198174  | -1.764015 |
| C | 4.549303  | 2.793917  | -1.475650 | H | -4.027460 | 0.388466  | -3.688414 |
| C | 3.823545  | 1.809290  | -0.833369 | H | -5.675124 | 0.259202  | 0.277800  |
| H | 1.029979  | 5.784209  | -1.664161 | C | 4.448081  | 0.498214  | -0.517645 |
| C | 2.067579  | 5.567469  | -1.889732 | C | 4.342263  | -0.089356 | 0.754144  |
| C | 4.736631  | 5.018920  | -2.534465 | C | 5.214118  | -0.168509 | -1.486798 |
|   |           |           |           | C | 4.984367  | -1.289720 | 1.041815  |
|   |           |           |           | C | 5.850934  | -1.372573 | -1.198906 |

|   |           |           |           |                                      |           |           |           |
|---|-----------|-----------|-----------|--------------------------------------|-----------|-----------|-----------|
| C | 5.751191  | -1.959630 | 0.072890  | C                                    | -8.013879 | -2.544603 | -3.116904 |
| H | 4.870067  | -1.728478 | 2.029376  | H                                    | -8.130019 | -1.292272 | -4.870096 |
| H | 6.448742  | -1.855550 | -1.966942 | H                                    | -7.659190 | -3.588704 | -1.262469 |
| O | -0.182508 | 1.619429  | -1.461047 | H                                    | -8.778566 | -3.237284 | -3.458296 |
| O | 1.726332  | 1.122403  | 0.135189  | C                                    | 6.426934  | -3.245039 | 0.381485  |
| P | 0.543277  | 0.342991  | -0.703044 | C                                    | 7.021160  | -3.467600 | 1.636106  |
| O | -0.348502 | -0.300862 | 0.317867  | C                                    | 6.491435  | -4.275491 | -0.572809 |
| O | 1.111084  | -0.499219 | -1.826444 | C                                    | 7.656702  | -4.674557 | 1.925708  |
| S | -3.020611 | -3.169185 | 1.102879  | H                                    | 7.006407  | -2.676036 | 2.380250  |
| O | -0.018618 | -2.641358 | -2.376491 | C                                    | 7.127807  | -5.482282 | -0.284342 |
| H | -1.743464 | -1.567814 | -1.701077 | H                                    | 6.015625  | -4.136114 | -1.539509 |
| H | -0.272201 | -2.572532 | -0.063311 | C                                    | 7.713687  | -5.687984 | 0.966544  |
| C | -0.501208 | -4.675869 | -0.645001 | H                                    | 8.116720  | -4.819685 | 2.899888  |
| C | -1.138097 | -5.625339 | -1.465671 | H                                    | 7.158559  | -6.266690 | -1.036299 |
| C | 0.381925  | -5.119597 | 0.357357  | H                                    | 8.210184  | -6.628158 | 1.191445  |
| C | -0.895077 | -6.982801 | -1.284756 |                                      |           |           |           |
| H | -1.822074 | -5.302121 | -2.243617 |                                      |           |           |           |
| C | 0.622752  | -6.477980 | 0.536552  | <b>(R)-4-TS1-R E= -3375.07678543</b> |           |           |           |
| H | 0.873228  | -4.388267 | 0.992975  | H                                    | 0.392552  | 1.994801  | -2.272756 |
| C | -0.015525 | -7.411057 | -0.285059 | C                                    | 0.076861  | -0.961786 | 3.300045  |
| H | -1.391202 | -7.709756 | -1.921080 | C                                    | 0.005258  | 0.365417  | 3.737617  |
| H | 1.306481  | -6.809673 | 1.312266  | C                                    | -0.476456 | 0.681782  | 5.018723  |
| H | 0.170891  | -8.472533 | -0.146767 | C                                    | -0.868005 | -0.360362 | 5.859429  |
| H | -3.898860 | 1.778391  | 1.061074  | C                                    | -0.798019 | -1.689778 | 5.435962  |
| H | -2.269766 | 1.921089  | -2.911515 | C                                    | -0.329704 | -1.986342 | 4.153974  |
| H | 3.749628  | 0.396777  | 1.521390  | H                                    | 0.444538  | -1.174291 | 2.301780  |
| H | 5.296821  | 0.256168  | -2.483255 | H                                    | -1.236687 | -0.124458 | 6.855394  |
| C | -6.031366 | -0.746793 | -2.230033 | H                                    | -1.109719 | -2.488561 | 6.103026  |
| C | -6.665251 | -0.567098 | -3.471688 | H                                    | -0.278589 | -3.016355 | 3.813492  |
| C | -6.408544 | -1.849029 | -1.442793 | C                                    | -0.570048 | 2.141446  | 5.391673  |
| C | -7.646294 | -1.455717 | -3.910456 | H                                    | -1.534928 | 2.551406  | 5.056436  |
| H | -6.403032 | 0.290981  | -4.084800 | H                                    | -0.537276 | 2.269353  | 6.479338  |
| C | -7.389797 | -2.737473 | -1.882462 | C                                    | 0.570251  | 2.929783  | 4.732869  |
| H | -5.903084 | -2.028832 | -0.497631 | H                                    | 0.472057  | 4.004048  | 4.896203  |
|   |           |           |           | H                                    | 1.531042  | 2.621290  | 5.172560  |

|   |           |           |           |   |           |           |           |
|---|-----------|-----------|-----------|---|-----------|-----------|-----------|
| C | 0.666546  | 2.664599  | 3.240449  | H | 0.911793  | -6.270902 | 2.540111  |
| N | 0.401465  | 1.407096  | 2.861266  | H | 2.232230  | -4.768770 | 1.145559  |
| H | 0.531609  | 1.138503  | 1.871912  | H | -1.283448 | -7.079785 | 3.355995  |
| C | 0.368614  | 3.729222  | -1.202695 | C | 2.774940  | -2.725078 | -0.514162 |
| C | 1.636748  | 3.194945  | -0.717459 | C | 3.098197  | -2.466265 | -1.857119 |
| H | -0.538754 | 3.330055  | -0.751325 | C | 3.780546  | -2.534903 | 0.442168  |
| H | 1.585490  | 2.197544  | -0.290484 | C | 4.375166  | -2.047806 | -2.214931 |
| C | -2.455660 | -1.193112 | -0.820624 | C | 5.058570  | -2.107428 | 0.076367  |
| C | -2.240088 | -2.558900 | -0.932406 | C | 5.390728  | -1.855303 | -1.261225 |
| C | -3.165203 | -3.339999 | -1.706973 | H | 4.581898  | -1.870635 | -3.266854 |
| C | -4.328708 | -2.698104 | -2.244051 | H | 5.795781  | -1.968544 | 0.859687  |
| C | -4.521541 | -1.310796 | -2.031547 | C | -3.816570 | 0.931059  | -1.204741 |
| C | -3.603944 | -0.532713 | -1.351533 | C | -3.615722 | 1.603972  | 0.013222  |
| H | -2.070880 | -5.211067 | -1.640740 | C | -4.270327 | 1.688623  | -2.292655 |
| C | -2.965149 | -4.717083 | -2.002596 | C | -3.866863 | 2.968234  | 0.125122  |
| C | -5.262035 | -3.461597 | -2.997256 | C | -4.520570 | 3.056923  | -2.173328 |
| H | -5.422183 | -0.846325 | -2.424497 | C | -4.327305 | 3.733553  | -0.961956 |
| C | -5.048913 | -4.798005 | -3.244633 | H | -3.705920 | 3.442513  | 1.089627  |
| C | -3.880597 | -5.425125 | -2.750657 | H | -4.863540 | 3.593073  | -3.051583 |
| H | -6.145576 | -2.961081 | -3.386570 | O | 0.320610  | -1.575882 | -1.454808 |
| H | -5.766092 | -5.369414 | -3.827549 | O | -1.522787 | -0.431147 | -0.136168 |
| H | -3.700351 | -6.474623 | -2.967540 | P | -0.077671 | -0.096127 | -0.852901 |
| C | -1.032148 | -3.164529 | -0.294760 | O | 0.835971  | 0.350488  | 0.257533  |
| C | -1.131091 | -4.219796 | 0.676668  | C | 6.790252  | -1.397144 | -1.708260 |
| C | 0.226287  | -2.668132 | -0.606776 | C | 7.406864  | -2.472003 | -2.635872 |
| C | -2.373236 | -4.693664 | 1.183333  | H | 8.403313  | -2.160835 | -2.973817 |
| C | 0.073615  | -4.791991 | 1.202328  | H | 6.790125  | -2.642037 | -3.524697 |
| C | 1.438814  | -3.236139 | -0.110545 | H | 7.508629  | -3.429086 | -2.111563 |
| C | -2.421678 | -5.695679 | 2.128100  | C | 6.680950  | -0.061188 | -2.481167 |
| H | -3.293282 | -4.245754 | 0.826490  | H | 6.241208  | 0.723135  | -1.854157 |
| C | -0.011662 | -5.837567 | 2.162893  | H | 6.057456  | -0.155939 | -3.375977 |
| C | 1.328657  | -4.296615 | 0.768779  | H | 7.674537  | 0.275708  | -2.802161 |
| C | -1.231397 | -6.284413 | 2.617482  | C | -4.594627 | 5.239053  | -0.787492 |
| H | -3.383487 | -6.033574 | 2.504357  | C | -5.663869 | 5.448440  | 0.311811  |



|   |           |           |           |   |           |           |           |
|---|-----------|-----------|-----------|---|-----------|-----------|-----------|
| H | -5.941146 | -1.763101 | -1.110438 | C | -5.319617 | 2.822997  | 0.605940  |
| C | -5.111096 | -5.532675 | -2.354948 | H | -4.278675 | 2.461747  | 2.467368  |
| C | -3.777438 | -5.966676 | -2.167923 | H | -6.222272 | 2.781186  | -1.357256 |
| H | -6.497070 | -3.915909 | -2.104804 | O | -0.076138 | -1.519900 | -1.445666 |
| H | -5.834743 | -6.191446 | -2.827246 | O | -1.746758 | -0.760230 | 0.306460  |
| H | -3.479912 | -6.954605 | -2.509186 | P | -0.602350 | -0.143926 | -0.702129 |
| C | -0.869298 | -3.364613 | -0.160307 | O | 0.443212  | 0.485372  | 0.171357  |
| C | -0.586532 | -4.468748 | 0.715873  | C | 6.061286  | 0.029376  | -2.757912 |
| C | 0.195347  | -2.638626 | -0.677817 | C | 6.615166  | -0.726223 | -3.989706 |
| C | -1.597211 | -5.180402 | 1.420449  | H | 7.439566  | -0.162790 | -4.444215 |
| C | 0.778795  | -4.848759 | 0.930490  | H | 5.848405  | -0.872280 | -4.757867 |
| C | 1.562773  | -3.003842 | -0.481805 | H | 6.994707  | -1.714506 | -3.705402 |
| C | -1.278957 | -6.226521 | 2.259040  | C | 5.550661  | 1.422940  | -3.196821 |
| H | -2.632381 | -4.882986 | 1.300646  | H | 5.158111  | 1.982970  | -2.340188 |
| C | 1.071850  | -5.944617 | 1.788461  | H | 4.753195  | 1.344760  | -3.943865 |
| C | 1.814298  | -4.115668 | 0.300373  | H | 6.367092  | 2.005448  | -3.641917 |
| C | 0.067454  | -6.623575 | 2.439087  | C | -5.775939 | 4.237596  | 1.005141  |
| H | -2.069891 | -6.748864 | 2.790561  | C | -6.655117 | 4.156083  | 2.276074  |
| H | 2.112388  | -6.228239 | 1.928732  | H | -6.983128 | 5.158187  | 2.579803  |
| H | 2.841408  | -4.438489 | 0.447950  | H | -6.113016 | 3.712598  | 3.117905  |
| H | 0.304334  | -7.455199 | 3.097140  | H | -7.547599 | 3.546040  | 2.095564  |
| C | 2.684819  | -2.222239 | -1.065158 | C | -4.536053 | 5.116478  | 1.298298  |
| C | 2.670090  | -1.753331 | -2.390654 | H | -4.845426 | 6.128267  | 1.589638  |
| C | 3.828512  | -1.956499 | -0.299536 | H | -3.894134 | 5.197500  | 0.413554  |
| C | 3.751817  | -1.049362 | -2.910634 | H | -3.932033 | 4.704576  | 2.113912  |
| C | 4.908825  | -1.247632 | -0.828257 | O | -1.225522 | 0.672596  | -1.816822 |
| C | 4.898513  | -0.770351 | -2.145064 | S | 3.314958  | 3.267445  | 0.409585  |
| H | 3.697848  | -0.713637 | -3.943043 | O | -0.231783 | 2.831161  | -2.476154 |
| H | 5.763748  | -1.062926 | -0.186651 | H | 1.572238  | 1.743156  | -2.110094 |
| C | -4.423446 | 0.196151  | -0.066998 | H | 0.392370  | 2.713611  | -0.236086 |
| C | -4.102260 | 0.778348  | 1.170964  | C | 0.525147  | 4.829085  | -0.805149 |
| C | -5.198391 | 0.951733  | -0.955792 | C | 1.019389  | 5.797795  | -1.697962 |
| C | -4.544780 | 2.056382  | 1.494585  | C | -0.186946 | 5.248162  | 0.334410  |
| C | -5.635165 | 2.236308  | -0.626098 | C | 0.804928  | 7.150288  | -1.453430 |

|                                      |           |           |           |   |           |           |           |
|--------------------------------------|-----------|-----------|-----------|---|-----------|-----------|-----------|
| H                                    | 1.571106  | 5.493345  | -2.581381 | H | -1.967250 | 1.328104  | 6.837928  |
| C                                    | -0.399754 | 6.601640  | 0.576948  | C | -1.340445 | 2.545975  | 5.154560  |
| H                                    | -0.567863 | 4.501548  | 1.025543  | H | -1.977873 | 3.408811  | 5.352997  |
| C                                    | 0.095983  | 7.554223  | -0.317470 | H | -0.361753 | 2.752143  | 5.614227  |
| H                                    | 1.190794  | 7.892288  | -2.146323 | C | -1.104658 | 2.441073  | 3.658380  |
| H                                    | -0.950278 | 6.914401  | 1.459205  | N | -0.675996 | 1.245894  | 3.224433  |
| H                                    | -0.068424 | 8.611767  | -0.129905 | H | -0.382815 | 1.148647  | 2.240054  |
| H                                    | 3.863818  | -2.282103 | 0.736218  | C | -2.070841 | 3.053751  | -0.691691 |
| H                                    | 1.807450  | -1.945376 | -3.018768 | C | -0.776580 | 3.595459  | -0.288494 |
| H                                    | -3.505172 | 0.223020  | 1.886296  | H | -2.373456 | 2.111279  | -0.238457 |
| H                                    | -5.442475 | 0.540653  | -1.931547 | H | -0.068041 | 2.861193  | 0.081143  |
| C                                    | 7.218131  | 0.237137  | -1.762092 | C | -1.269284 | -2.340573 | -0.701453 |
| H                                    | 6.896053  | 0.800007  | -0.878521 | C | -0.309702 | -3.342640 | -0.727375 |
| H                                    | 7.644853  | -0.715279 | -1.427027 | C | -0.586702 | -4.531146 | -1.492556 |
| H                                    | 8.021139  | 0.808200  | -2.241903 | C | -1.887016 | -4.692165 | -2.072853 |
| C                                    | -6.597513 | 4.923995  | -0.102958 | C | -2.846449 | -3.656106 | -1.937011 |
| H                                    | -6.020389 | 5.037194  | -1.027734 | C | -2.556575 | -2.466322 | -1.303705 |
| H                                    | -7.512142 | 4.367185  | -0.336639 | H | 1.382901  | -5.428659 | -1.344134 |
| H                                    | -6.896455 | 5.926086  | 0.225646  | C | 0.379175  | -5.547966 | -1.734055 |
| <b>(R)-5-TS1-R E= -3994.43108856</b> |           |           |           | C | -2.186171 | -5.872476 | -2.805797 |
| H                                    | -0.880869 | 1.902277  | -1.893273 | H | -3.830204 | -3.798957 | -2.375551 |
| C                                    | 0.213105  | -0.993210 | 3.552437  | C | -1.235249 | -6.848034 | -2.997126 |
| C                                    | -0.506910 | 0.101165  | 4.044184  | C | 0.063857  | -6.672347 | -2.465719 |
| C                                    | -1.094974 | 0.066064  | 5.319501  | H | -3.182588 | -5.981021 | -3.227681 |
| C                                    | -0.918822 | -1.074755 | 6.103177  | H | -1.472926 | -7.742773 | -3.565866 |
| C                                    | -0.190400 | -2.168321 | 5.628643  | H | 0.823948  | -7.428954 | -2.640998 |
| C                                    | 0.367837  | -2.127111 | 4.349019  | C | 0.990837  | -3.156739 | -0.016729 |
| H                                    | 0.630835  | -0.949216 | 2.552943  | C | 1.478682  | -4.117980 | 0.937043  |
| H                                    | -1.364800 | -1.106498 | 7.094862  | C | 1.773064  | -2.036065 | -0.273410 |
| H                                    | -0.064400 | -3.048429 | 6.252811  | C | 0.684714  | -5.191199 | 1.430250  |
| H                                    | 0.924981  | -2.976682 | 3.965613  | C | 2.807680  | -3.972283 | 1.452746  |
| C                                    | -1.921516 | 1.254823  | 5.745709  | C | 3.111224  | -1.888981 | 0.200961  |
| H                                    | -2.957240 | 1.130083  | 5.395122  | C | 1.186354  | -6.082674 | 2.353826  |
|                                      |           |           |           | H | -0.335917 | -5.296223 | 1.081201  |

|   |           |           |           |   |           |           |           |
|---|-----------|-----------|-----------|---|-----------|-----------|-----------|
| C | 3.302067  | -4.920472 | 2.389587  | H | 2.495156  | -0.560665 | -3.507346 |
| C | 3.603566  | -2.877556 | 1.027902  | H | 3.120842  | -1.863674 | -4.537316 |
| C | 2.512343  | -5.957022 | 2.832332  | H | 4.048459  | -0.369297 | -4.345659 |
| H | 0.555341  | -6.887319 | 2.721548  | C | 3.872324  | 0.252986  | 2.172462  |
| H | 4.317166  | -4.800828 | 2.760765  | H | 3.124237  | -0.536726 | 2.280068  |
| H | 4.627162  | -2.807436 | 1.386528  | C | 5.021148  | -0.062648 | 3.151201  |
| H | 2.898588  | -6.671497 | 3.554098  | H | 5.491439  | -1.026451 | 2.924918  |
| C | 3.977068  | -0.736126 | -0.217075 | H | 4.647959  | -0.100984 | 4.181839  |
| C | 4.466589  | -0.668411 | -1.545103 | H | 5.803509  | 0.704517  | 3.106496  |
| C | 4.356813  | 0.253234  | 0.722399  | C | 3.179204  | 1.575887  | 2.550360  |
| C | 5.322499  | 0.377549  | -1.900296 | H | 2.350372  | 1.781187  | 1.867500  |
| C | 5.220808  | 1.275860  | 0.316752  | H | 3.874818  | 2.423392  | 2.525079  |
| C | 5.718610  | 1.362000  | -0.987568 | H | 2.777921  | 1.511506  | 3.569122  |
| H | 5.678041  | 0.440311  | -2.924794 | C | -3.151689 | -0.845951 | -3.752585 |
| H | 5.537855  | 2.014773  | 1.046954  | H | -2.275445 | -1.474208 | -3.570128 |
| C | -3.553809 | -1.345678 | -1.247120 | C | -2.647219 | 0.425983  | -4.458467 |
| C | -4.239263 | -1.070951 | -0.039175 | H | -2.089049 | 0.148873  | -5.360599 |
| C | -3.821952 | -0.572413 | -2.404330 | H | -1.979853 | 0.997316  | -3.810695 |
| C | -5.161949 | -0.021478 | -0.004349 | H | -3.469720 | 1.078586  | -4.775831 |
| C | -4.754432 | 0.467206  | -2.316639 | C | -4.104563 | -1.621934 | -4.686692 |
| C | -5.430156 | 0.769774  | -1.128518 | H | -4.999328 | -1.028533 | -4.912289 |
| H | -5.711647 | 0.169822  | 0.912427  | H | -4.437703 | -2.565106 | -4.241137 |
| H | -4.938372 | 1.081968  | -3.192093 | H | -3.606831 | -1.853661 | -5.636191 |
| O | 1.282509  | -1.041252 | -1.102351 | C | -4.057205 | -1.937099 | 1.206757  |
| O | -1.006074 | -1.181640 | 0.010124  | H | -3.157314 | -2.542828 | 1.070473  |
| P | 0.060545  | -0.073907 | -0.579405 | C | -3.848791 | -1.112692 | 2.489032  |
| O | 0.426429  | 0.790692  | 0.596969  | H | -4.746373 | -0.545886 | 2.764390  |
| C | 4.120956  | -1.710772 | -2.608916 | H | -3.021397 | -0.406637 | 2.370968  |
| H | 3.432246  | -2.436932 | -2.169075 | H | -3.609979 | -1.775677 | 3.328651  |
| C | 5.372943  | -2.496607 | -3.048270 | C | -5.240960 | -2.913431 | 1.364198  |
| H | 5.860735  | -2.978147 | -2.193030 | H | -5.346227 | -3.553708 | 0.481274  |
| H | 6.110831  | -1.843012 | -3.528762 | H | -6.184915 | -2.371525 | 1.498963  |
| H | 5.100778  | -3.277113 | -3.769112 | H | -5.094539 | -3.559737 | 2.238284  |
| C | 3.403545  | -1.083690 | -3.819746 | O | -0.465281 | 0.570145  | -1.847997 |



|   |           |          |           |   |           |           |           |
|---|-----------|----------|-----------|---|-----------|-----------|-----------|
| S | -1.317424 | 3.777985 | 2.660286  | H | 7.184578  | 5.790862  | -0.862015 |
| O | -1.269469 | 2.903981 | -1.886771 | H | 9.062947  | 5.341995  | -2.432954 |
| C | -0.345326 | 4.978546 | -0.421961 |   |           |           |           |
| C | -1.221154 | 6.017514 | -0.786906 |   |           |           |           |
| C | 1.006506  | 5.277925 | -0.168650 | H | 0.497481  | -2.057660 | -1.951784 |
| C | -0.752064 | 7.322438 | -0.896823 | C | -0.637683 | 0.638241  | 3.620868  |
| H | -2.266592 | 5.806195 | -0.986759 | C | 0.266410  | -0.333519 | 4.065288  |
| C | 1.471904  | 6.584664 | -0.276788 | C | 0.825789  | -0.266734 | 5.352148  |
| H | 1.681656  | 4.476979 | 0.119154  | C | 0.439552  | 0.777614  | 6.193010  |
| C | 0.593243  | 7.607908 | -0.642416 | C | -0.469640 | 1.748060  | 5.764798  |
| H | -1.433722 | 8.119391 | -1.179135 | C | -1.000956 | 1.678889  | 4.474869  |
| H | 2.516191  | 6.806296 | -0.077848 | H | -1.033596 | 0.572465  | 2.613586  |
| H | 0.955162  | 8.628850 | -0.727899 | H | 0.863240  | 0.832518  | 7.193469  |
| H | -2.908468 | 3.728626 | -0.853051 | H | -0.757126 | 2.554582  | 6.433373  |
| C | -6.397556 | 1.895947 | -1.061705 | H | -1.700243 | 2.434035  | 4.127576  |
| C | -7.252608 | 2.183240 | -2.140021 | C | 1.849085  | -1.310414 | 5.729376  |
| C | -6.479627 | 2.710364 | 0.081742  | H | 2.849896  | -0.978699 | 5.413596  |
| C | -8.155007 | 3.244561 | -2.078188 | H | 1.891585  | -1.441067 | 6.816414  |
| H | -7.225002 | 1.552103 | -3.023857 | C | 1.522524  | -2.647470 | 5.050589  |
| C | -7.383025 | 3.771260 | 0.145041  | H | 2.305452  | -3.389250 | 5.214335  |
| H | -5.813574 | 2.521897 | 0.919428  | H | 0.592758  | -3.056666 | 5.474664  |
| C | -8.224839 | 4.044002 | -0.935179 | C | 1.290301  | -2.495623 | 3.557544  |
| H | -8.811510 | 3.441639 | -2.921846 | N | 0.650880  | -1.377166 | 3.185663  |
| H | -7.423112 | 4.390417 | 1.037624  | H | 0.349652  | -1.274018 | 2.203734  |
| H | -8.928869 | 4.870388 | -0.886548 | C | 0.365745  | -3.676298 | -0.704899 |
| C | 6.637979  | 2.458307 | -1.387932 | C | 1.768084  | -3.324845 | -0.520448 |
| C | 7.701847  | 2.223639 | -2.276372 | H | 0.097467  | -4.724405 | -0.814804 |
| C | 6.472464  | 3.761223 | -0.886785 | C | 0.605901  | 2.422734  | -0.716425 |
| C | 8.566168  | 3.252044 | -2.650333 | C | -0.523342 | 3.229083  | -0.762019 |
| H | 7.866009  | 1.219269 | -2.656595 | C | -0.470022 | 4.434442  | -1.548283 |
| C | 7.337292  | 4.790045 | -1.258144 | C | 0.779184  | 4.828868  | -2.128225 |
| H | 5.642557  | 3.971458 | -0.217797 | C | 1.919897  | 4.004942  | -1.951708 |
| C | 8.388758  | 4.540680 | -2.142579 | C | 1.857805  | 2.797314  | -1.288726 |
| H | 9.386004  | 3.043575 | -3.333013 | H | -2.574733 | 4.943090  | -1.419603 |

**(R)-5-TS1-S E= -3994.43057784**

|   |           |           |           |   |           |           |           |
|---|-----------|-----------|-----------|---|-----------|-----------|-----------|
| C | -1.610495 | 5.243763  | -1.811639 | C | 4.956397  | 1.166360  | 0.186094  |
| C | 0.851931  | 6.028452  | -2.887043 | C | 4.725727  | 0.428013  | -2.083753 |
| H | 2.867843  | 4.332243  | -2.370349 | C | 5.444676  | 0.403913  | -0.881842 |
| C | -0.266801 | 6.799756  | -3.101901 | H | 5.519276  | 1.190264  | 1.114814  |
| C | -1.511490 | 6.391415  | -2.567809 | H | 5.077253  | -0.175371 | -2.914868 |
| H | 1.812017  | 6.317028  | -3.308508 | O | -1.681277 | 0.692872  | -1.110461 |
| H | -0.201027 | 7.710727  | -3.690399 | O | 0.558376  | 1.235345  | -0.005868 |
| H | -2.400749 | 6.985709  | -2.759999 | P | -0.319452 | -0.046113 | -0.555757 |
| C | -1.769660 | 2.827891  | -0.043611 | O | -0.564312 | -0.916859 | 0.645987  |
| C | -2.412480 | 3.698436  | 0.904656  | C | -4.549792 | 0.828557  | -2.635232 |
| C | -2.345406 | 1.588059  | -0.289479 | H | -4.020371 | 1.675304  | -2.190582 |
| C | -1.816999 | 4.898995  | 1.382070  | C | -5.910945 | 1.363604  | -3.124419 |
| C | -3.693451 | 3.326288  | 1.428243  | H | -6.505561 | 1.758831  | -2.292857 |
| C | -3.637192 | 1.213622  | 0.188207  | H | -6.500655 | 0.578284  | -3.612241 |
| C | -2.462394 | 5.697174  | 2.301584  | H | -5.765544 | 2.170818  | -3.852641 |
| H | -0.832520 | 5.176734  | 1.023725  | C | -3.693369 | 0.327044  | -3.813946 |
| C | -4.341247 | 4.181736  | 2.360988  | H | -2.714092 | -0.015491 | -3.467519 |
| C | -4.289413 | 2.107689  | 1.012531  | H | -3.536649 | 1.135141  | -4.538960 |
| C | -3.742924 | 5.344486  | 2.790229  | H | -4.180694 | -0.500926 | -4.342895 |
| H | -1.981135 | 6.603989  | 2.657837  | C | -4.083389 | -0.995658 | 2.188133  |
| H | -5.318244 | 3.890306  | 2.739355  | H | -3.489323 | -0.085295 | 2.301401  |
| H | -5.284669 | 1.865277  | 1.375632  | C | -5.294860 | -0.874018 | 3.134137  |
| H | -4.244890 | 5.986493  | 3.508889  | H | -5.921678 | -0.011735 | 2.879351  |
| C | -4.290381 | -0.073540 | -0.223525 | H | -4.960094 | -0.755217 | 4.171837  |
| C | -4.730580 | -0.243454 | -1.560200 | H | -5.929481 | -1.767315 | 3.087808  |
| C | -4.521269 | -1.098706 | 0.726729  | C | -3.179659 | -2.171301 | 2.605063  |
| C | -5.384640 | -1.426319 | -1.914403 | H | -2.306787 | -2.233461 | 1.949786  |
| C | -5.187520 | -2.260013 | 0.321192  | H | -3.712519 | -3.129125 | 2.570205  |
| C | -5.627350 | -2.451308 | -0.992665 | H | -2.827886 | -2.027051 | 3.633806  |
| H | -5.699822 | -1.564278 | -2.944683 | C | 2.845648  | 1.162987  | -3.595699 |
| H | -5.391344 | -3.032206 | 1.057382  | H | 1.840613  | 1.569487  | -3.451544 |
| C | 3.081186  | 1.938512  | -1.143950 | C | 2.674737  | -0.252788 | -4.175843 |
| C | 3.791905  | 1.932170  | 0.079811  | H | 2.068201  | -0.207347 | -5.088037 |
| C | 3.554100  | 1.176407  | -2.240116 | H | 2.166165  | -0.906954 | -3.464842 |



|   |           |           |           |   |           |           |           |
|---|-----------|-----------|-----------|---|-----------|-----------|-----------|
| H | 1.197820  | -2.739191 | 6.596228  | C | -2.050027 | 5.217046  | 2.623177  |
| C | 0.244331  | -3.510982 | 4.805215  | C | -2.795521 | 3.411573  | 1.105503  |
| H | 0.541336  | -4.554600 | 4.919478  | C | -1.046380 | 5.992866  | 3.156645  |
| H | -0.759429 | -3.409918 | 5.245622  | H | 1.081088  | 6.419019  | 3.147152  |
| C | 0.104795  | -3.197837 | 3.326087  | H | -3.075276 | 5.324413  | 2.969416  |
| N | 0.140329  | -1.895403 | 3.006725  | H | -3.815863 | 3.568329  | 1.445472  |
| H | -0.060976 | -1.614704 | 2.034581  | H | -1.270408 | 6.726850  | 3.925849  |
| C | 0.771402  | -3.774315 | -1.104095 | C | -3.636124 | 1.511823  | -0.298352 |
| C | -0.635619 | -3.753230 | -0.720562 | C | -4.065915 | 1.621083  | -1.640573 |
| H | 1.437907  | -3.103159 | -0.565021 | C | -4.292111 | 0.603605  | 0.569559  |
| H | -0.966506 | -2.830971 | -0.253508 | C | -5.128914 | 0.824064  | -2.085941 |
| C | 1.859585  | 1.818861  | -0.576745 | C | -5.353606 | -0.158914 | 0.072416  |
| C | 1.167223  | 3.021864  | -0.550673 | C | -5.796650 | -0.075692 | -1.252946 |
| C | 1.745409  | 4.156262  | -1.223474 | H | -5.440720 | 0.928236  | -3.118939 |
| C | 3.067836  | 4.040547  | -1.761996 | H | -5.851539 | -0.843759 | 0.752957  |
| C | 3.753378  | 2.802794  | -1.666720 | C | 3.907778  | 0.370387  | -1.093237 |
| C | 3.169766  | 1.677797  | -1.122653 | C | 4.498415  | -0.080656 | 0.111454  |
| H | 0.036709  | 5.482190  | -1.056477 | C | 4.065738  | -0.388286 | -2.275073 |
| C | 1.054524  | 5.385437  | -1.415068 | C | 5.229407  | -1.271059 | 0.104115  |
| C | 3.662407  | 5.159042  | -2.406556 | C | 4.813796  | -1.574276 | -2.224721 |
| H | 4.763497  | 2.736226  | -2.061559 | C | 5.406799  | -2.043785 | -1.050932 |
| C | 2.974221  | 6.341308  | -2.552147 | H | 5.684161  | -1.599686 | 1.034203  |
| C | 1.651383  | 6.445844  | -2.061754 | H | 4.930083  | -2.139283 | -3.141985 |
| H | 4.671663  | 5.054447  | -2.797757 | O | -0.917176 | 1.223382  | -1.129121 |
| H | 3.435818  | 7.187462  | -3.053660 | O | 1.295981  | 0.707268  | 0.030975  |
| H | 1.096947  | 7.370002  | -2.201345 | P | 0.003174  | -0.049272 | -0.646710 |
| C | -0.162587 | 3.114902  | 0.122752  | O | -0.625597 | -0.854364 | 0.459005  |
| C | -0.430503 | 4.096089  | 1.141043  | C | -3.450512 | 2.613792  | -2.627240 |
| C | -1.185431 | 2.243996  | -0.231504 | H | -2.631198 | 3.134528  | -2.124491 |
| C | 0.584825  | 4.903153  | 1.726733  | C | -4.471266 | 3.693344  | -3.041084 |
| C | -1.771373 | 4.245094  | 1.623999  | H | -4.868016 | 4.220666  | -2.166034 |
| C | -2.533787 | 2.393011  | 0.212070  | H | -5.320685 | 3.259556  | -3.582241 |
| C | 0.285470  | 5.822078  | 2.709484  | H | -4.000058 | 4.433125  | -3.699810 |
| H | 1.610861  | 4.779405  | 1.400132  | C | -2.849410 | 1.913050  | -3.860823 |

|   |           |           |           |   |           |           |           |
|---|-----------|-----------|-----------|---|-----------|-----------|-----------|
| H | -2.097861 | 1.175943  | -3.563647 | S | -0.142086 | -4.428046 | 2.205275  |
| H | -2.366603 | 2.648454  | -4.515931 | O | 0.126002  | -3.171445 | -2.249768 |
| H | -3.619326 | 1.401621  | -4.451187 | C | -1.613491 | -4.800804 | -0.969244 |
| C | -3.894588 | 0.417501  | 2.034756  | C | -1.259701 | -6.079733 | -1.436824 |
| H | -2.987692 | 0.999848  | 2.217300  | C | -2.968335 | -4.511546 | -0.719322 |
| C | -4.983240 | 0.950959  | 2.987645  | C | -2.239908 | -7.043312 | -1.650312 |
| H | -5.200082 | 2.009000  | 2.801361  | H | -0.220000 | -6.321507 | -1.632513 |
| H | -4.663491 | 0.848772  | 4.031851  | C | -3.946309 | -5.478407 | -0.932418 |
| H | -5.922388 | 0.396709  | 2.869902  | H | -3.242764 | -3.525955 | -0.353726 |
| C | -3.553828 | -1.048347 | 2.363261  | C | -3.582988 | -6.744503 | -1.399040 |
| H | -2.765868 | -1.415597 | 1.700218  | H | -1.959530 | -8.028911 | -2.010196 |
| H | -4.427630 | -1.704024 | 2.266602  | H | -4.988618 | -5.245726 | -0.736145 |
| H | -3.196824 | -1.129384 | 3.397238  | H | -4.345404 | -7.500600 | -1.565518 |
| C | 3.479656  | 0.050427  | -3.618858 | H | 1.240738  | -4.721372 | -1.362121 |
| H | 2.735933  | 0.827680  | -3.421577 | C | 6.226528  | -3.346254 | -0.986728 |
| C | 2.751502  | -1.083740 | -4.363844 | C | 5.552959  | -4.328620 | 0.001076  |
| H | 2.253713  | -0.681268 | -5.254103 | C | 6.334678  | -4.043715 | -2.356364 |
| H | 1.989407  | -1.543985 | -3.731566 | C | 7.660277  | -3.032450 | -0.496235 |
| H | 3.442701  | -1.863938 | -4.704901 | H | 5.477049  | -3.905634 | 1.008136  |
| C | 4.571451  | 0.659332  | -4.523727 | H | 4.538936  | -4.582116 | -0.330184 |
| H | 5.350214  | -0.080060 | -4.748279 | H | 6.129418  | -5.259668 | 0.070979  |
| H | 5.058253  | 1.519614  | -4.052464 | H | 6.831413  | -3.409074 | -3.099047 |
| H | 4.140834  | 0.993935  | -5.475511 | H | 6.925551  | -4.961691 | -2.257779 |
| C | 4.412471  | 0.723900  | 1.408247  | H | 5.351609  | -4.324646 | -2.751310 |
| H | 3.674982  | 1.519009  | 1.267767  | H | 8.255708  | -3.952265 | -0.438910 |
| C | 3.933531  | -0.120809 | 2.602288  | H | 8.165415  | -2.342689 | -1.182146 |
| H | 4.659601  | -0.897294 | 2.871940  | H | 7.660585  | -2.573636 | 0.497959  |
| H | 2.980061  | -0.608166 | 2.378198  | C | -6.976098 | -0.944283 | -1.728963 |
| H | 3.788569  | 0.514742  | 3.483621  | C | -7.302113 | -0.730015 | -3.219478 |
| C | 5.759101  | 1.408561  | 1.718207  | C | -6.633604 | -2.439782 | -1.524800 |
| H | 6.069814  | 2.061631  | 0.894871  | C | -8.237976 | -0.593975 | -0.904464 |
| H | 6.553496  | 0.668781  | 1.875435  | H | -7.595239 | 0.305119  | -3.428100 |
| H | 5.682719  | 2.018632  | 2.626770  | H | -6.451104 | -0.980137 | -3.863148 |
| O | 0.390678  | -0.742356 | -1.940704 | H | -8.139267 | -1.374726 | -3.511287 |

|                                      |           |           |           |   |           |           |           |
|--------------------------------------|-----------|-----------|-----------|---|-----------|-----------|-----------|
| H                                    | -6.435894 | -2.669015 | -0.471952 | C | 0.741428  | 4.864227  | -1.744696 |
| H                                    | -7.468331 | -3.071708 | -1.853512 | C | 1.903286  | 4.065852  | -1.591353 |
| H                                    | -5.745853 | -2.720272 | -2.103656 | C | 1.862501  | 2.805354  | -1.032236 |
| H                                    | -9.088930 | -1.207844 | -1.225487 | H | -2.634784 | 4.817881  | -1.141006 |
| H                                    | -8.085295 | -0.767353 | 0.165997  | C | -1.669298 | 5.179310  | -1.474653 |
| H                                    | -8.509946 | 0.459539  | -1.036168 | C | 0.798085  | 6.124056  | -2.400242 |
| <b>(R)-6-TS1-S E= -3846.82712340</b> |           |           |           | H | 2.854383  | 4.459613  | -1.939814 |
| H                                    | 0.564238  | -1.991069 | -2.221510 | C | -0.338199 | 6.876643  | -2.587606 |
| C                                    | -0.550605 | 0.126387  | 3.550297  | C | -1.584652 | 6.388618  | -2.129782 |
| C                                    | 0.292265  | -0.934233 | 3.903554  | H | 1.760674  | 6.475279  | -2.764586 |
| C                                    | 0.844917  | -1.021977 | 5.192025  | H | -0.284362 | 7.835030  | -3.096724 |
| C                                    | 0.516927  | -0.038448 | 6.125584  | H | -2.486382 | 6.970290  | -2.301428 |
| C                                    | -0.329213 | 1.020902  | 5.788074  | C | -1.803010 | 2.625330  | 0.084513  |
| C                                    | -0.856216 | 1.103170  | 4.497069  | C | -2.493310 | 3.395354  | 1.084898  |
| H                                    | -0.943240 | 0.180075  | 2.540894  | C | -2.339214 | 1.398351  | -0.282629 |
| H                                    | 0.936142  | -0.102091 | 7.127377  | C | -1.943592 | 4.565327  | 1.679463  |
| H                                    | -0.572183 | 1.777948  | 6.528333  | C | -3.777357 | 2.948960  | 1.538262  |
| H                                    | -1.507048 | 1.927638  | 4.220247  | C | -3.630879 | 0.950391  | 0.127261  |
| C                                    | 1.798408  | -2.158256 | 5.472597  | C | -2.635305 | 5.266595  | 2.643442  |
| H                                    | 2.820683  | -1.862067 | 5.192694  | H | -0.957782 | 4.898047  | 1.375541  |
| H                                    | 1.822622  | -2.392805 | 6.542589  | C | -4.473352 | 3.706381  | 2.519425  |
| C                                    | 1.395731  | -3.403109 | 4.670130  | C | -4.327849 | 1.754717  | 1.005689  |
| H                                    | 2.129867  | -4.204281 | 4.766132  | C | -3.919028 | 4.843052  | 3.062251  |
| H                                    | 0.438326  | -3.791231 | 5.050241  | H | -2.188380 | 6.151378  | 3.088806  |
| C                                    | 1.187877  | -3.096222 | 3.197605  | H | -5.452006 | 3.359763  | 2.842991  |
| N                                    | 0.622087  | -1.911459 | 2.930540  | H | -5.324454 | 1.455839  | 1.319908  |
| H                                    | 0.338406  | -1.695795 | 1.961125  | H | -4.457678 | 5.409437  | 3.817040  |
| C                                    | 0.294338  | -3.749666 | -1.187968 | C | -4.235084 | -0.315463 | -0.405808 |
| C                                    | 1.688878  | -3.468870 | -0.869277 | C | -4.634548 | -0.393438 | -1.759660 |
| H                                    | 0.009036  | -4.767202 | -1.444756 | C | -4.461636 | -1.421910 | 0.450026  |
| C                                    | 0.603538  | 2.343009  | -0.546850 | C | -5.242069 | -1.566271 | -2.227840 |
| C                                    | -0.549266 | 3.117396  | -0.561235 | C | -5.077545 | -2.563786 | -0.070847 |
| C                                    | -0.511295 | 4.385500  | -1.241930 | C | -5.478508 | -2.671191 | -1.407499 |
|                                      |           |           |           | H | -5.542729 | -1.599730 | -3.268979 |

|   |           |           |           |   |           |           |           |
|---|-----------|-----------|-----------|---|-----------|-----------|-----------|
| H | -5.246307 | -3.401936 | 0.599487  | H | 1.955641  | 1.605345  | -3.222455 |
| C | 3.125495  | 2.003507  | -0.889677 | C | 2.985444  | -0.078570 | -4.022422 |
| C | 3.810796  | 1.994663  | 0.348637  | H | 2.381807  | -0.051676 | -4.937229 |
| C | 3.682346  | 1.330306  | -1.999411 | H | 2.546024  | -0.821354 | -3.353049 |
| C | 5.039472  | 1.335843  | 0.439891  | H | 3.990354  | -0.413293 | -4.307487 |
| C | 4.920465  | 0.686219  | -1.851852 | C | 3.648814  | 2.341409  | -4.320843 |
| C | 5.628610  | 0.678027  | -0.647150 | H | 4.704782  | 2.100599  | -4.496429 |
| H | 5.559430  | 1.353765  | 1.393740  | H | 3.602537  | 3.357067  | -3.914365 |
| H | 5.338283  | 0.189403  | -2.719412 | H | 3.137956  | 2.342579  | -5.291534 |
| O | -1.631758 | 0.598189  | -1.163726 | C | 3.272032  | 2.711669  | 1.586504  |
| O | 0.567076  | 1.091843  | 0.048155  | H | 2.290374  | 3.125213  | 1.339318  |
| P | -0.259043 | -0.147873 | -0.651612 | C | 3.067561  | 1.745190  | 2.767866  |
| O | -0.503730 | -1.148118 | 0.445332  | H | 4.017562  | 1.315842  | 3.109112  |
| C | -4.473350 | 0.771040  | -2.737537 | H | 2.403129  | 0.922802  | 2.487105  |
| H | -3.969335 | 1.589688  | -2.217215 | H | 2.615347  | 2.268807  | 3.618437  |
| C | -5.843972 | 1.312072  | -3.192578 | C | 4.170819  | 3.898366  | 1.986741  |
| H | -6.453215 | 1.621593  | -2.335717 | H | 4.273272  | 4.614052  | 1.163182  |
| H | -6.410955 | 0.556152  | -3.748917 | H | 5.177486  | 3.563860  | 2.265115  |
| H | -5.713635 | 2.180736  | -3.849629 | H | 3.745583  | 4.428301  | 2.847798  |
| C | -3.594722 | 0.396570  | -3.946800 | O | 0.418771  | -0.609672 | -1.928546 |
| H | -2.608365 | 0.053247  | -3.621500 | S | 1.611366  | -4.222032 | 2.018313  |
| H | -3.455949 | 1.267944  | -4.598368 | O | 0.758093  | -3.032184 | -2.363218 |
| H | -4.054764 | -0.395941 | -4.549339 | H | -0.448095 | -3.211084 | -0.603189 |
| C | -4.062291 | -1.428668 | 1.926463  | H | 1.871282  | -2.498092 | -0.427432 |
| H | -3.503500 | -0.511761 | 2.131918  | C | 2.837805  | -4.306241 | -1.174887 |
| C | -5.300297 | -1.429357 | 2.845519  | C | 2.712159  | -5.661466 | -1.530672 |
| H | -5.950649 | -0.569735 | 2.647099  | C | 4.120247  | -3.730841 | -1.101507 |
| H | -4.997175 | -1.390387 | 3.898929  | C | 3.844947  | -6.420088 | -1.807819 |
| H | -5.900409 | -2.336231 | 2.703368  | H | 1.731613  | -6.123662 | -1.580793 |
| C | -3.127750 | -2.604399 | 2.268765  | C | 5.250735  | -4.491770 | -1.382150 |
| H | -2.239408 | -2.584652 | 1.632044  | H | 4.218197  | -2.683075 | -0.829992 |
| H | -3.625319 | -3.573512 | 2.142748  | C | 5.113936  | -5.837149 | -1.735506 |
| H | -2.803595 | -2.534466 | 3.314350  | H | 3.741181  | -7.466937 | -2.077523 |
| C | 3.000231  | 1.315343  | -3.368589 | H | 6.236073  | -4.039130 | -1.323654 |





|   |           |           |           |   |           |           |           |
|---|-----------|-----------|-----------|---|-----------|-----------|-----------|
| C | -0.669717 | 3.678586  | -0.151861 | O | -0.464681 | -0.243635 | 0.749319  |
| C | -1.041652 | 4.752968  | 0.730663  | C | -4.002979 | 2.341319  | -2.548837 |
| C | -1.555531 | 2.619625  | -0.304780 | H | -3.250523 | 3.042496  | -2.178146 |
| C | -0.142027 | 5.785707  | 1.116919  | C | -5.207913 | 3.185558  | -3.010660 |
| C | -2.363839 | 4.770949  | 1.282525  | H | -5.632655 | 3.759683  | -2.179261 |
| C | -2.887117 | 2.631928  | 0.208596  | H | -6.005738 | 2.557797  | -3.424896 |
| C | -0.537001 | 6.790721  | 1.973369  | H | -4.901570 | 3.892640  | -3.791106 |
| H | 0.873469  | 5.769934  | 0.738528  | C | -3.369634 | 1.581363  | -3.730151 |
| C | -2.745794 | 5.832445  | 2.147537  | H | -2.488662 | 1.019358  | -3.406490 |
| C | -3.265062 | 3.722730  | 0.964164  | H | -3.057487 | 2.287150  | -4.509422 |
| C | -1.855295 | 6.825178  | 2.486980  | H | -4.078482 | 0.879532  | -4.185699 |
| H | 0.172653  | 7.562348  | 2.259377  | C | -3.775937 | 0.732551  | 2.364536  |
| H | -3.756859 | 5.835959  | 2.547861  | H | -2.949258 | 1.447518  | 2.386683  |
| H | -4.280031 | 3.774229  | 1.349301  | C | -4.858048 | 1.246997  | 3.335012  |
| H | -2.156530 | 7.627481  | 3.154853  | H | -5.231946 | 2.233371  | 3.037601  |
| C | -3.863072 | 1.532542  | -0.096083 | H | -4.453333 | 1.330605  | 4.350877  |
| C | -4.391249 | 1.404857  | -1.404684 | H | -5.716505 | 0.565358  | 3.371799  |
| C | -4.301129 | 0.660519  | 0.930569  | C | -3.210692 | -0.617520 | 2.844454  |
| C | -5.340064 | 0.408464  | -1.658554 | H | -2.429548 | -0.968795 | 2.165046  |
| C | -5.259799 | -0.313989 | 0.626153  | H | -3.988609 | -1.387085 | 2.913000  |
| C | -5.789170 | -0.459045 | -0.658651 | H | -2.771991 | -0.505843 | 3.843407  |
| H | -5.753256 | 0.308014  | -2.658444 | C | 3.301801  | 0.620794  | -3.551460 |
| H | -5.603720 | -0.984876 | 1.408303  | H | 2.421287  | 1.259273  | -3.436515 |
| C | 3.759239  | 1.466831  | -1.154490 | C | 2.806255  | -0.735681 | -4.084693 |
| C | 4.461164  | 1.363048  | 0.069907  | H | 2.215922  | -0.579404 | -4.995086 |
| C | 3.990642  | 0.526340  | -2.188677 | H | 2.169986  | -1.242358 | -3.356217 |
| C | 5.377371  | 0.319071  | 0.241075  | H | 3.635029  | -1.403744 | -4.347938 |
| C | 4.913744  | -0.502861 | -1.965319 | C | 4.234986  | 1.278922  | -4.590402 |
| C | 5.613277  | -0.627385 | -0.760348 | H | 5.139890  | 0.676423  | -4.737944 |
| H | 5.929008  | 0.237860  | 1.173348  | H | 4.549448  | 2.281137  | -4.281628 |
| H | 5.097932  | -1.233409 | -2.747285 | H | 3.728494  | 1.367851  | -5.559185 |
| O | -1.172823 | 1.527293  | -1.065661 | C | 4.297251  | 2.388000  | 1.191562  |
| O | 1.146957  | 1.536156  | 0.008504  | H | 3.428333  | 3.009856  | 0.959212  |
| P | -0.030315 | 0.496868  | -0.486383 | C | 4.027696  | 1.735515  | 2.559012  |

|   |           |           |           |   |            |           |           |
|---|-----------|-----------|-----------|---|------------|-----------|-----------|
| H | 4.887823  | 1.154494  | 2.912779  | C | -8.727292  | -3.528265 | -1.500389 |
| H | 3.161394  | 1.068963  | 2.510736  | H | -9.464622  | -4.300793 | -1.710044 |
| H | 3.817823  | 2.504350  | 3.311453  | C | 5.625117   | -5.011730 | 2.016376  |
| C | 5.520974  | 3.324354  | 1.255691  | H | 5.371283   | -5.838925 | 2.673930  |
| H | 5.675250  | 3.840846  | 0.301575  | C | 4.701181   | -3.940494 | 1.843396  |
| H | 6.435940  | 2.764822  | 1.484938  | H | 3.750614   | -3.957226 | 2.371172  |
| H | 5.386259  | 4.083880  | 2.035649  | C | 9.447041   | -0.692107 | -2.727414 |
| O | 0.413147  | -0.290150 | -1.706171 | H | 9.732930   | 0.136078  | -3.370472 |
| S | 0.726954  | -3.370457 | 2.959769  | C | 10.342191  | -1.787014 | -2.556104 |
| O | 0.675340  | -2.742051 | -1.636566 | H | 11.297593  | -1.787247 | -3.073911 |
| C | -0.612991 | -4.537665 | -0.082284 | C | -5.704345  | -5.079909 | -3.008314 |
| C | 0.060482  | -5.752620 | -0.308820 | H | -5.412652  | -5.983184 | -3.537557 |
| C | -2.009117 | -4.548454 | 0.097484  | C | -4.727514  | -4.081129 | -2.727017 |
| C | -0.649760 | -6.947635 | -0.353158 | H | -3.698624  | -4.235539 | -3.039779 |
| H | 1.137196  | -5.763155 | -0.443875 | C | -8.601121  | -0.161774 | 0.134612  |
| C | -2.717783 | -5.745170 | 0.046448  | C | -9.908564  | -0.018863 | 0.521047  |
| H | -2.531570 | -3.612388 | 0.273496  | C | -10.861989 | -1.043893 | 0.256312  |
| C | -2.037677 | -6.945188 | -0.177374 | H | -7.885526  | 0.627392  | 0.337293  |
| H | -0.124042 | -7.882578 | -0.523518 | H | -10.225594 | 0.886360  | 1.032124  |
| H | -3.795689 | -5.740801 | 0.173877  | H | -11.893744 | -0.913295 | 0.571495  |
| H | -2.588645 | -7.881033 | -0.214287 | C | -7.002732  | -4.898902 | -2.612574 |
| H | 2.141958  | -3.823397 | -0.572250 | H | -7.756175  | -5.655502 | -2.819787 |
| C | 6.582657  | -1.748661 | -0.552533 | C | -5.073882  | -2.930681 | -2.065737 |
| C | 7.826850  | -1.744131 | -1.228968 | H | -4.322277  | -2.176128 | -1.860890 |
| C | 6.248877  | -2.820882 | 0.310886  | C | 9.999383   | -2.828660 | -1.736441 |
| C | 8.746792  | -2.844700 | -1.045628 | H | 10.677173  | -3.666759 | -1.591246 |
| C | 7.178155  | -3.914547 | 0.488022  | C | 8.235188   | -0.671076 | -2.086838 |
| C | 8.397500  | -3.898270 | -0.195577 | H | 7.566235   | 0.171684  | -2.220607 |
| H | 9.092332  | -4.725051 | -0.061363 | C | 5.004082   | -2.886806 | 1.018845  |
| C | -6.806741 | -1.516266 | -0.953873 | H | 4.297401   | -2.072661 | 0.902939  |
| C | -8.149784 | -1.341306 | -0.542740 | C | 6.824844   | -4.995211 | 1.356740  |
| C | -6.421717 | -2.692922 | -1.640058 | H | 7.536904   | -5.808033 | 1.480736  |
| C | -9.124417 | -2.372622 | -0.820867 | C | -10.477748 | -2.183775 | -0.397579 |
| C | -7.406184 | -3.714793 | -1.918305 | H | -11.197991 | -2.970277 | -0.610992 |

**(R)-7-TS1-S E= -4608.96757008**

|   |           |           |           |   |           |           |           |
|---|-----------|-----------|-----------|---|-----------|-----------|-----------|
| H | -0.221463 | -1.271766 | -1.992484 | H | 3.795783  | 4.262689  | -2.274610 |
| C | 0.080405  | 0.823957  | 3.977776  | C | 1.226955  | 7.282790  | -3.118526 |
| C | 0.543744  | -0.478689 | 4.198032  | C | -0.072179 | 7.158804  | -2.572473 |
| C | 1.145626  | -0.838376 | 5.415359  | H | 3.163579  | 6.379433  | -3.294635 |
| C | 1.249878  | 0.126081  | 6.417879  | H | 1.472787  | 8.134229  | -3.747153 |
| C | 0.780529  | 1.426349  | 6.216346  | H | -0.824013 | 7.910897  | -2.796135 |
| C | 0.202494  | 1.772253  | 4.992995  | C | -1.032951 | 3.841181  | 0.112448  |
| H | -0.359296 | 1.076517  | 3.018708  | C | -1.487501 | 4.874502  | 1.004923  |
| H | 1.709021  | -0.146082 | 7.365657  | C | -1.844978 | 2.729111  | -0.070021 |
| H | 0.869183  | 2.164037  | 7.008824  | C | -0.666245 | 5.960273  | 1.418655  |
| H | -0.158375 | 2.782741  | 4.823678  | C | -2.816876 | 4.797196  | 1.533956  |
| C | 1.675667  | -2.245350 | 5.547772  | C | -3.177597 | 2.638283  | 0.433142  |
| H | 2.703824  | -2.293552 | 5.158161  | C | -1.142905 | 6.927210  | 2.276982  |
| H | 1.724825  | -2.547196 | 6.599770  | H | 0.354758  | 6.016745  | 1.059297  |
| C | 0.790064  | -3.220438 | 4.760386  | C | -3.284700 | 5.821638  | 2.401314  |
| H | 1.204011  | -4.229710 | 4.748755  | C | -3.639403 | 3.692628  | 1.194296  |
| H | -0.201592 | -3.281531 | 5.234266  | C | -2.469389 | 6.868312  | 2.765944  |
| C | 0.560559  | -2.763351 | 3.330698  | H | -0.491572 | 7.741015  | 2.584267  |
| N | 0.427668  | -1.441528 | 3.162168  | H | -4.300611 | 5.752916  | 2.783247  |
| H | 0.152523  | -1.075177 | 2.236550  | H | -4.658745 | 3.668867  | 1.570738  |
| C | -1.092385 | -2.769526 | -0.940710 | H | -2.835600 | 7.641690  | 3.435547  |
| C | 0.297684  | -3.205998 | -0.864061 | C | -4.054199 | 1.459260  | 0.129020  |
| H | -1.867420 | -3.508561 | -1.129705 | C | -4.493386 | 1.222522  | -1.198131 |
| C | 1.207476  | 2.929828  | -0.537531 | C | -4.475778 | 0.597598  | 1.172389  |
| C | 0.264906  | 3.946804  | -0.619523 | C | -5.319074 | 0.123011  | -1.454339 |
| C | 0.556701  | 5.079906  | -1.459941 | C | -5.325241 | -0.472599 | 0.865634  |
| C | 1.856461  | 5.187056  | -2.052355 | C | -5.748713 | -0.738664 | -0.439040 |
| C | 2.805583  | 4.155239  | -1.840126 | H | -5.646167 | -0.070043 | -2.472194 |
| C | 2.502622  | 3.012402  | -1.130455 | H | -5.661261 | -1.128198 | 1.663842  |
| H | -1.401521 | 6.009011  | -1.365954 | C | 3.520041  | 1.918805  | -0.971033 |
| C | -0.397882 | 6.090256  | -1.765695 | C | 4.232539  | 1.796297  | 0.245039  |
| C | 2.167231  | 6.311455  | -2.864184 | C | 3.801705  | 1.046100  | -2.051217 |
|   |           |           |           | C | 5.207276  | 0.798725  | 0.363914  |
|   |           |           |           | C | 4.790143  | 0.068873  | -1.883761 |

|   |           |           |           |   |           |           |           |
|---|-----------|-----------|-----------|---|-----------|-----------|-----------|
| C | 5.497012  | -0.076338 | -0.686348 | H | 4.906105  | 1.296966  | -4.616031 |
| H | 5.761875  | 0.700384  | 1.293086  | H | 4.265979  | 2.867661  | -4.110799 |
| H | 5.017744  | -0.606297 | -2.703404 | H | 3.457371  | 1.955834  | -5.397672 |
| O | -1.387033 | 1.687773  | -0.856093 | C | 4.009470  | 2.745272  | 1.421568  |
| O | 0.922408  | 1.804768  | 0.222827  | H | 3.154643  | 3.384943  | 1.184495  |
| P | -0.180405 | 0.708784  | -0.309434 | C | 3.665998  | 1.995414  | 2.721128  |
| O | -0.599634 | -0.100951 | 0.887091  | H | 4.495866  | 1.362941  | 3.058415  |
| C | -4.148956 | 2.150910  | -2.363499 | H | 2.785183  | 1.360907  | 2.586320  |
| H | -3.464235 | 2.920807  | -1.999438 | H | 3.447502  | 2.707687  | 3.525580  |
| C | -5.409041 | 2.880956  | -2.872492 | C | 5.225262  | 3.673162  | 1.619563  |
| H | -5.892125 | 3.447424  | -2.068004 | H | 5.433688  | 4.253397  | 0.713462  |
| H | -6.146517 | 2.176403  | -3.275166 | H | 6.128206  | 3.101305  | 1.865019  |
| H | -5.146793 | 3.583513  | -3.672877 | H | 5.041353  | 4.377648  | 2.439914  |
| C | -3.433197 | 1.414705  | -3.511876 | O | 0.320314  | -0.003926 | -1.551306 |
| H | -2.518489 | 0.931469  | -3.157162 | S | 0.435973  | -3.890292 | 2.082481  |
| H | -3.159115 | 2.125220  | -4.301025 | O | -0.551801 | -2.255842 | -2.187152 |
| H | -4.075024 | 0.650632  | -3.966399 | H | -1.387894 | -1.995235 | -0.234685 |
| C | -4.035639 | 0.761707  | 2.627651  | H | 0.988098  | -2.467593 | -0.477540 |
| H | -3.294189 | 1.563640  | 2.670910  | C | 0.839257  | -4.466252 | -1.331645 |
| C | -5.213593 | 1.170105  | 3.534429  | C | 0.024565  | -5.507594 | -1.819279 |
| H | -5.678980 | 2.103236  | 3.196834  | C | 2.234134  | -4.653479 | -1.272975 |
| H | -4.870696 | 1.315657  | 4.565975  | C | 0.597324  | -6.701887 | -2.240877 |
| H | -5.992839 | 0.398570  | 3.547370  | H | -1.051486 | -5.379436 | -1.875765 |
| C | -3.349178 | -0.510125 | 3.161990  | C | 2.801624  | -5.855209 | -1.684407 |
| H | -2.512792 | -0.791888 | 2.516396  | H | 2.866343  | -3.861056 | -0.883880 |
| H | -4.043615 | -1.356730 | 3.219722  | C | 1.984249  | -6.878004 | -2.172167 |
| H | -2.959707 | -0.332127 | 4.171433  | H | -0.034361 | -7.499499 | -2.620535 |
| C | 3.090210  | 1.150190  | -3.401226 | H | 3.876801  | -5.992108 | -1.621757 |
| H | 2.191124  | 1.756228  | -3.259352 | H | 2.425835  | -7.815956 | -2.497732 |
| C | 2.627271  | -0.212972 | -3.947235 | C | 6.528193  | -1.151256 | -0.537444 |
| H | 2.030248  | -0.063684 | -4.854744 | C | 6.221048  | -2.325298 | 0.191228  |
| H | 2.006097  | -0.733085 | -3.215217 | C | 7.209888  | -3.373335 | 0.312740  |
| H | 3.471264  | -0.858662 | -4.217759 | C | 8.460397  | -3.211735 | -0.291381 |
| C | 3.982595  | 1.862196  | -4.439332 | H | 9.201357  | -4.003498 | -0.199075 |

|   |            |           |           |                                |            |           |           |
|---|------------|-----------|-----------|--------------------------------|------------|-----------|-----------|
| C | -6.625915  | -1.909755 | -0.746942 | C                              | -8.520225  | -0.397342 | -1.367459 |
| C | -7.945027  | -1.702465 | -1.223916 | H                              | -7.926744  | 0.467137  | -1.093091 |
| C | -6.137084  | -3.229507 | -0.570891 | H                              | -4.163692  | -2.681658 | 0.155546  |
| C | -8.774732  | -2.838822 | -1.557399 | H                              | -7.134968  | -6.518076 | -0.954781 |
| C | -6.982794  | -4.356780 | -0.895590 | H                              | -10.707043 | -3.483740 | -2.298530 |
| C | -8.271459  | -4.131736 | -1.387589 | H                              | -11.612037 | -1.195848 | -2.552199 |
| H | -8.900895  | -4.983629 | -1.637271 | H                              | -10.210655 | 0.774026  | -1.925184 |
| C | 4.945439   | -2.536874 | 0.810951  |                                |            |           |           |
| C | 4.667609   | -3.690289 | 1.500754  |                                |            |           |           |
| H | 3.689349   | -3.827142 | 1.954688  | <b>(S)-1 E= -384.838385435</b> |            |           |           |
| C | 5.649222   | -4.717191 | 1.620430  | C                              | 0.636528   | 0.539994  | 0.074112  |
| H | 5.413056   | -5.623459 | 2.171750  | C                              | 0.980021   | 1.929960  | -0.293241 |
| C | 6.881139   | -4.558872 | 1.043580  | H                              | 1.100265   | 2.180239  | -1.347512 |
| H | 7.637446   | -5.336017 | 1.128813  | H                              | 1.533457   | 2.557075  | 0.407055  |
| H | 4.194131   | -1.758381 | 0.732303  | O                              | -0.346692  | 1.583123  | 0.107665  |
| C | 7.800651   | -1.002714 | -1.139244 | H                              | 0.951865   | 0.196378  | 1.061554  |
| C | 8.781783   | -2.057291 | -1.011945 | C                              | 0.470422   | -0.534481 | -0.948314 |
| C | 10.062973  | -1.893798 | -1.626960 | C                              | 1.206427   | -1.720848 | -0.839349 |
| C | 10.372915  | -0.757030 | -2.324333 | C                              | -0.405563  | -0.369632 | -2.028820 |
| H | 11.350415  | -0.645890 | -2.785954 | C                              | 1.083918   | -2.720582 | -1.805226 |
| C | 9.413850   | 0.289861  | -2.443051 | H                              | 1.878211   | -1.862047 | 0.004852  |
| C | 8.173893   | 0.171738  | -1.870546 | C                              | -0.530199  | -1.370744 | -2.991729 |
| H | 10.789004  | -2.697176 | -1.525196 | H                              | -0.997948  | 0.538282  | -2.090910 |
| H | 9.672733   | 1.191731  | -2.991397 | C                              | 0.216007   | -2.547309 | -2.885325 |
| H | 7.453378   | 0.976707  | -1.963935 | H                              | 1.661466   | -3.636360 | -1.710568 |
| C | -6.482245  | -5.684019 | -0.707452 | H                              | -1.216405  | -1.235451 | -3.823717 |
| C | -5.220777  | -5.904807 | -0.224118 | H                              | 0.116241   | -3.327257 | -3.635408 |
| H | -4.857686  | -6.918443 | -0.077036 |                                |            |           |           |
| C | -4.378221  | -4.799550 | 0.089457  | <b>(S)-2 E= -707.829268328</b> |            |           |           |
| H | -3.381931  | -4.981271 | 0.485624  | C                              | 1.702463   | 0.013227  | 1.167884  |
| C | -4.816987  | -3.511719 | -0.087157 | C                              | 1.726306   | -0.729978 | -0.120133 |
| C | -10.101236 | -2.616873 | -2.044858 | H                              | 1.082459   | 0.904617  | 1.236008  |
| C | -10.601725 | -1.350257 | -2.183018 | H                              | 1.755135   | -0.569031 | 2.085368  |
| C | -9.799444  | -0.227492 | -1.830562 | S                              | 3.282740   | 0.217335  | 0.267914  |
|   |            |           |           | H                              | 1.166357   | -0.270187 | -0.931955 |

|                                 |           |           |           |   |           |           |           |
|---------------------------------|-----------|-----------|-----------|---|-----------|-----------|-----------|
| C                               | 1.743428  | -2.221746 | -0.177308 | C | -2.722522 | 4.096683  | -2.826181 |
| C                               | 0.966413  | -2.867811 | -1.148121 | H | -3.487364 | 2.348629  | -1.872272 |
| C                               | 2.486553  | -3.002736 | 0.720947  | C | -0.521059 | 4.838223  | -2.171548 |
| C                               | 0.918692  | -4.261739 | -1.214192 | C | 0.768194  | 3.540566  | -0.509465 |
| H                               | 0.391485  | -2.274298 | -1.855456 | C | -1.649958 | 5.012604  | -2.937979 |
| C                               | 2.438388  | -4.393298 | 0.656114  | H | -3.602359 | 4.219262  | -3.451875 |
| H                               | 3.124089  | -2.515571 | 1.453634  | H | 0.320259  | 5.520968  | -2.261845 |
| C                               | 1.653113  | -5.029265 | -0.310517 | H | 1.583820  | 4.251312  | -0.611123 |
| H                               | 0.309511  | -4.744438 | -1.973736 | H | -1.715260 | 5.840990  | -3.637859 |
| H                               | 3.021906  | -4.984196 | 1.357184  | C | 2.217370  | 2.215544  | 1.055098  |
| H                               | 1.621095  | -6.114217 | -0.360920 | C | 2.277401  | 2.448953  | 2.451184  |
|                                 |           |           |           | C | 3.378403  | 1.807615  | 0.356553  |
|                                 |           |           |           | C | 3.494705  | 2.273216  | 3.115013  |
|                                 |           |           |           | C | 4.571786  | 1.652124  | 1.073866  |
|                                 |           |           |           | C | 4.657222  | 1.876087  | 2.447678  |
|                                 |           |           |           | H | 3.536390  | 2.457366  | 4.185810  |
|                                 |           |           |           | H | 5.467345  | 1.340000  | 0.541758  |
|                                 |           |           |           | C | -3.309394 | -2.909001 | -0.030930 |
|                                 |           |           |           | C | -3.065160 | -3.431916 | -1.325832 |
|                                 |           |           |           | C | -3.405262 | -3.788747 | 1.075734  |
|                                 |           |           |           | C | -2.909075 | -4.812164 | -1.481870 |
|                                 |           |           |           | C | -3.243526 | -5.163568 | 0.857279  |
|                                 |           |           |           | C | -2.990657 | -5.699937 | -0.405231 |
|                                 |           |           |           | H | -2.726270 | -5.205159 | -2.478913 |
|                                 |           |           |           | H | -3.319749 | -5.843104 | 1.703015  |
|                                 |           |           |           | O | -0.020743 | 0.458962  | 1.286710  |
|                                 |           |           |           | O | -1.194585 | -1.041318 | -0.387552 |
|                                 |           |           |           | P | 0.086844  | -1.003364 | 0.603681  |
|                                 |           |           |           | O | 1.316755  | -1.404780 | -0.101497 |
|                                 |           |           |           | C | 1.067597  | 2.922132  | 3.257176  |
|                                 |           |           |           | H | 0.206343  | 2.973550  | 2.584837  |
|                                 |           |           |           | C | 1.284515  | 4.344534  | 3.811337  |
|                                 |           |           |           | H | 1.501987  | 5.055346  | 3.006119  |
|                                 |           |           |           | H | 2.121500  | 4.376390  | 4.518844  |
| <b>(R)-C1 E= -2582.02345706</b> |           |           |           |   |           |           |           |
| C                               | -2.425690 | -0.511315 | 0.002496  |   |           |           |           |
| C                               | -2.556175 | 0.863113  | 0.132222  |   |           |           |           |
| C                               | -3.819581 | 1.380040  | 0.590684  |   |           |           |           |
| C                               | -4.921605 | 0.477206  | 0.742034  |   |           |           |           |
| C                               | -4.732938 | -0.905184 | 0.487973  |   |           |           |           |
| C                               | -3.501101 | -1.432811 | 0.158953  |   |           |           |           |
| H                               | -3.190952 | 3.437237  | 0.869672  |   |           |           |           |
| C                               | -4.022029 | 2.745174  | 0.936332  |   |           |           |           |
| C                               | -6.181551 | 0.977424  | 1.169708  |   |           |           |           |
| H                               | -5.584763 | -1.572563 | 0.585879  |   |           |           |           |
| C                               | -6.348483 | 2.308727  | 1.473079  |   |           |           |           |
| C                               | -5.250942 | 3.195221  | 1.367380  |   |           |           |           |
| H                               | -7.009766 | 0.279685  | 1.266999  |   |           |           |           |
| H                               | -7.314103 | 2.678552  | 1.806443  |   |           |           |           |
| H                               | -5.376245 | 4.241127  | 1.633790  |   |           |           |           |
| C                               | -1.405331 | 1.763784  | -0.172471 |   |           |           |           |
| C                               | -1.518331 | 2.848609  | -1.112254 |   |           |           |           |
| C                               | -0.176600 | 1.561982  | 0.437514  |   |           |           |           |
| C                               | -2.660499 | 3.045978  | -1.937092 |   |           |           |           |
| C                               | -0.416801 | 3.753077  | -1.259275 |   |           |           |           |
| C                               | 0.932817  | 2.445194  | 0.313479  |   |           |           |           |

|   |           |           |           |                                |           |           |           |
|---|-----------|-----------|-----------|--------------------------------|-----------|-----------|-----------|
| H | 0.388113  | 4.691872  | 4.339637  | H                              | -5.372003 | -3.311896 | 3.915019  |
| C | 0.701346  | 1.937162  | 4.384166  | C                              | -2.815730 | -7.201207 | -0.594490 |
| H | 0.511698  | 0.936905  | 3.982896  | H                              | -2.937690 | -7.666907 | 0.393303  |
| H | -0.202891 | 2.274291  | 4.905633  | C                              | -3.895956 | -7.794783 | -1.518815 |
| H | 1.502485  | 1.859668  | 5.128824  | H                              | -3.785844 | -8.883424 | -1.592567 |
| C | 5.977322  | 1.694237  | 3.185773  | H                              | -3.822686 | -7.384032 | -2.532803 |
| H | 6.720831  | 1.376656  | 2.441831  | H                              | -4.901878 | -7.577752 | -1.142939 |
| C | 6.477043  | 3.015312  | 3.801203  | C                              | -1.403139 | -7.552784 | -1.099024 |
| H | 7.456442  | 2.876035  | 4.274927  | H                              | -1.277734 | -8.639757 | -1.173229 |
| H | 5.785692  | 3.383426  | 4.568722  | H                              | -0.632992 | -7.165550 | -0.422869 |
| H | 6.574085  | 3.795613  | 3.038283  | H                              | -1.218367 | -7.127108 | -2.092367 |
| C | 5.891868  | 0.585527  | 4.252075  | C                              | -3.020957 | -2.550703 | -2.574406 |
| H | 5.571509  | -0.364059 | 3.809730  | H                              | -3.104065 | -1.506453 | -2.261394 |
| H | 5.175083  | 0.844980  | 5.040401  | C                              | -1.693724 | -2.688218 | -3.344215 |
| H | 6.867858  | 0.430168  | 4.727798  | H                              | -1.558942 | -3.701277 | -3.741678 |
| C | 3.393187  | 1.544210  | -1.150125 | H                              | -0.839348 | -2.457163 | -2.701250 |
| H | 2.359439  | 1.562144  | -1.507195 | H                              | -1.676897 | -1.996979 | -4.195556 |
| C | 4.160796  | 2.654605  | -1.896503 | C                              | -4.227275 | -2.836902 | -3.492108 |
| H | 3.732678  | 3.644786  | -1.702410 | H                              | -5.174559 | -2.691520 | -2.960492 |
| H | 4.134557  | 2.479562  | -2.978914 | H                              | -4.209869 | -3.867532 | -3.865984 |
| H | 5.212714  | 2.683788  | -1.587259 | H                              | -4.217125 | -2.166282 | -4.359973 |
| C | 3.961235  | 0.156563  | -1.504642 | O                              | -0.282912 | -1.875666 | 1.906254  |
| H | 3.394205  | -0.633626 | -1.006528 | H                              | 0.189121  | -2.724731 | 1.871059  |
| H | 5.017603  | 0.063547  | -1.225391 |                                |           |           |           |
| H | 3.895308  | -0.004761 | -2.587773 |                                |           |           |           |
| C | -3.709005 | -3.312544 | 2.498558  | <b>TS1-R E= -3768.21045413</b> |           |           |           |
| H | -3.645086 | -2.221241 | 2.514011  | H                              | 0.286981  | 2.038152  | -2.312366 |
| C | -2.697241 | -3.832433 | 3.537375  | C                              | -0.232407 | -0.090548 | 3.535327  |
| H | -2.935936 | -3.427479 | 4.527981  | C                              | -0.278090 | 1.278146  | 3.825303  |
| H | -1.680202 | -3.519054 | 3.286263  | C                              | -0.749100 | 1.741404  | 5.064951  |
| H | -2.711615 | -4.925418 | 3.618188  | C                              | -1.147732 | 0.803665  | 6.018016  |
| C | -5.143447 | -3.699781 | 2.914922  | C                              | -1.097587 | -0.565726 | 5.744935  |
| H | -5.267229 | -4.789136 | 2.940674  | C                              | -0.646002 | -1.008870 | 4.499524  |
| H | -5.888482 | -3.300905 | 2.217809  | H                              | 0.111530  | -0.417750 | 2.560147  |
|   |           |           |           | H                              | -1.508027 | 1.153151  | 6.983103  |

|   |           |           |           |   |           |           |           |
|---|-----------|-----------|-----------|---|-----------|-----------|-----------|
| H | -1.413050 | -1.280919 | 6.499339  | C | 1.075067  | -4.272750 | 1.852074  |
| H | -0.613856 | -2.070606 | 4.272379  | C | 2.131159  | -2.631456 | 0.370142  |
| C | -0.833041 | 3.234804  | 5.268454  | C | -1.215245 | -5.460632 | 2.965665  |
| H | -1.797534 | 3.606027  | 4.890170  | H | -2.344944 | -4.301282 | 1.573041  |
| H | -0.796710 | 3.487411  | 6.333992  | C | 1.186396  | -5.221476 | 2.904902  |
| C | 0.306990  | 3.939628  | 4.520371  | C | 2.221619  | -3.629243 | 1.319168  |
| H | 0.208099  | 5.025622  | 4.556019  | C | 0.067835  | -5.807268 | 3.452063  |
| H | 1.268473  | 3.686444  | 4.992742  | H | -2.099365 | -5.905846 | 3.414013  |
| C | 0.407069  | 3.501439  | 3.070084  | H | 2.177512  | -5.463881 | 3.281088  |
| N | 0.126976  | 2.210575  | 2.837853  | H | 3.200415  | -3.917189 | 1.693655  |
| H | 0.283757  | 1.828860  | 1.892588  | H | 0.165045  | -6.524624 | 4.262342  |
| C | 0.082870  | 3.877741  | -1.434564 | C | 3.359359  | -1.941311 | -0.147309 |
| C | 1.427219  | 3.566094  | -0.963427 | C | 3.800751  | -2.182560 | -1.472936 |
| H | -0.743065 | 3.422767  | -0.890564 | C | 4.107478  | -1.084666 | 0.695064  |
| H | 1.511858  | 2.635706  | -0.410324 | C | 4.967823  | -1.559633 | -1.924536 |
| C | -2.112700 | -1.462943 | -0.574147 | C | 5.272631  | -0.491260 | 0.189642  |
| C | -1.605521 | -2.750572 | -0.461363 | C | 5.722255  | -0.707859 | -1.112829 |
| C | -2.327662 | -3.826591 | -1.089325 | H | 5.301001  | -1.755460 | -2.940657 |
| C | -3.606784 | -3.552817 | -1.672891 | H | 5.854137  | 0.160032  | 0.838907  |
| C | -4.106009 | -2.225615 | -1.664678 | C | -3.922455 | 0.231721  | -1.227178 |
| C | -3.376562 | -1.166523 | -1.165649 | C | -4.502029 | 0.812553  | -0.074059 |
| H | -0.833779 | -5.373405 | -0.800676 | C | -3.913876 | 0.946749  | -2.448599 |
| C | -1.818956 | -5.151588 | -1.193318 | C | -5.062382 | 2.090743  | -0.165177 |
| C | -4.343692 | -4.609419 | -2.273478 | C | -4.491615 | 2.222729  | -2.482520 |
| H | -5.088510 | -2.037863 | -2.089228 | C | -5.069701 | 2.816262  | -1.359559 |
| C | -3.832028 | -5.885033 | -2.333880 | H | -5.512729 | 2.527119  | 0.722954  |
| C | -2.549412 | -6.150533 | -1.799374 | H | -4.493373 | 2.774789  | -3.419142 |
| H | -5.318258 | -4.383514 | -2.699897 | O | 0.730647  | -1.315750 | -1.077689 |
| H | -4.400966 | -6.683395 | -2.802393 | O | -1.405178 | -0.410950 | -0.011377 |
| H | -2.132356 | -7.151383 | -1.872262 | P | 0.005005  | 0.104271  | -0.680188 |
| C | -0.318793 | -2.998797 | 0.254449  | O | 0.731129  | 0.850391  | 0.407143  |
| C | -0.219467 | -3.950145 | 1.329502  | C | 3.078118  | -3.139884 | -2.421583 |
| C | 0.829069  | -2.311600 | -0.119144 | H | 2.183340  | -3.513786 | -1.917076 |
| C | -1.355263 | -4.561318 | 1.930573  | C | 3.953426  | -4.368562 | -2.742142 |



|   |           |           |           |   |           |           |           |
|---|-----------|-----------|-----------|---|-----------|-----------|-----------|
| H | 4.249592  | -4.894838 | -1.827529 | H | -5.118864 | 0.657602  | -4.965932 |
| H | 4.869199  | -4.082491 | -3.273279 | H | -5.062785 | -0.920974 | -4.169283 |
| H | 3.405318  | -5.073768 | -3.378779 | H | -4.025383 | -0.601112 | -5.570585 |
| C | 2.610420  | -2.438843 | -3.711245 | C | -5.686461 | 4.206567  | -1.446734 |
| H | 1.955704  | -1.593280 | -3.481544 | H | -5.562937 | 4.548364  | -2.483723 |
| H | 2.053046  | -3.141069 | -4.343141 | C | -7.197615 | 4.186548  | -1.146754 |
| H | 3.458409  | -2.067683 | -4.299626 | H | -7.632004 | 5.185485  | -1.275703 |
| C | 6.998598  | -0.046717 | -1.617305 | H | -7.394941 | 3.868749  | -0.115982 |
| H | 7.380553  | 0.580717  | -0.799546 | H | -7.723930 | 3.495974  | -1.814802 |
| C | 8.088272  | -1.085319 | -1.946139 | C | -4.958541 | 5.216969  | -0.539645 |
| H | 9.018581  | -0.589723 | -2.249593 | H | -5.378915 | 6.222611  | -0.662839 |
| H | 7.776578  | -1.740761 | -2.768117 | H | -3.889478 | 5.262612  | -0.775749 |
| H | 8.305420  | -1.718794 | -1.079100 | H | -5.053415 | 4.943650  | 0.517938  |
| C | 6.735124  | 0.875792  | -2.822631 | C | -4.578632 | 0.071141  | 1.260120  |
| H | 5.991371  | 1.643435  | -2.581354 | H | -4.012122 | -0.859622 | 1.165397  |
| H | 6.359609  | 0.309813  | -3.683191 | C | -3.939186 | 0.869595  | 2.410364  |
| H | 7.658871  | 1.378944  | -3.133903 | H | -4.485959 | 1.798220  | 2.614828  |
| C | 3.711914  | -0.780951 | 2.140546  | H | -2.903016 | 1.129035  | 2.174645  |
| H | 2.722999  | -1.210885 | 2.320500  | H | -3.936974 | 0.276931  | 3.332715  |
| C | 4.689416  | -1.435064 | 3.138040  | C | -6.032236 | -0.319363 | 1.594328  |
| H | 4.748260  | -2.519841 | 2.994030  | H | -6.468662 | -0.937539 | 0.801641  |
| H | 4.369034  | -1.246438 | 4.169968  | H | -6.666707 | 0.567409  | 1.712591  |
| H | 5.703059  | -1.032140 | 3.022851  | H | -6.073089 | -0.888069 | 2.531498  |
| C | 3.593811  | 0.730764  | 2.409044  | O | -0.241928 | 0.790141  | -2.011891 |
| H | 2.882286  | 1.187776  | 1.716233  | S | 0.907897  | 4.577171  | 1.877210  |
| H | 4.558831  | 1.242643  | 2.310332  | O | 0.618628  | 3.049092  | -2.492896 |
| H | 3.235242  | 0.904049  | 3.430967  | C | 2.634002  | 4.335086  | -1.221472 |
| C | -3.331298 | 0.364833  | -3.737869 | C | 2.614323  | 5.614939  | -1.805660 |
| H | -2.696692 | -0.483369 | -3.465207 | C | 3.868873  | 3.764625  | -0.857648 |
| C | -2.439811 | 1.359732  | -4.503677 | C | 3.802811  | 6.305052  | -2.020467 |
| H | -1.962413 | 0.852801  | -5.350718 | H | 1.671868  | 6.070912  | -2.091466 |
| H | -1.650830 | 1.755704  | -3.860975 | C | 5.055678  | 4.459789  | -1.070988 |
| H | -3.015244 | 2.199566  | -4.911796 | H | 3.886345  | 2.776981  | -0.405136 |
| C | -4.451082 | -0.158020 | -4.661861 | C | 5.023671  | 5.729497  | -1.653917 |

|                                |           |           |           |   |           |           |           |
|--------------------------------|-----------|-----------|-----------|---|-----------|-----------|-----------|
| H                              | 3.780267  | 7.293024  | -2.470907 | C | 1.475687  | 2.916163  | -1.069557 |
| H                              | 6.003247  | 4.014047  | -0.783561 | H | -3.240449 | 4.345849  | -1.155137 |
| H                              | 5.949526  | 6.273046  | -1.821170 | C | -2.330787 | 4.821155  | -1.502346 |
| H                              | -0.141577 | 4.882109  | -1.787470 | C | -0.009647 | 6.057141  | -2.462550 |
| <b>TS1-S E= -3768.20792842</b> |           |           |           | H | 2.243846  | 4.671154  | -2.003581 |
| H                              | 0.768844  | -2.010740 | -2.257400 | C | -1.233069 | 6.658719  | -2.647184 |
| C                              | -0.529829 | -0.100015 | 3.573699  | C | -2.404221 | 6.023602  | -2.171303 |
| C                              | 0.522437  | -0.967294 | 3.890052  | H | 0.898304  | 6.521988  | -2.839631 |
| C                              | 1.113858  | -0.954193 | 5.164052  | H | -1.304518 | 7.610062  | -3.167214 |
| C                              | 0.610328  | -0.074555 | 6.122972  | H | -3.373328 | 6.485545  | -2.339845 |
| C                              | -0.446747 | 0.788407  | 5.823474  | C | -2.128618 | 2.282531  | 0.078391  |
| C                              | -1.009393 | 0.777649  | 4.545029  | C | -2.904996 | 2.966620  | 1.077988  |
| H                              | -0.947619 | -0.115491 | 2.573145  | C | -2.505018 | 0.993261  | -0.273869 |
| H                              | 1.058509  | -0.062763 | 7.114120  | C | -2.507336 | 4.204327  | 1.656498  |
| H                              | -0.824550 | 1.467240  | 6.582798  | C | -4.116425 | 2.361882  | 1.547028  |
| H                              | -1.823487 | 1.452776  | 4.297202  | C | -3.724345 | 0.385943  | 0.151087  |
| C                              | 2.293700  | -1.865481 | 5.401223  | C | -3.276823 | 4.819539  | 2.620113  |
| H                              | 3.221446  | -1.354955 | 5.101560  | H | -1.575846 | 4.659450  | 1.340163  |
| H                              | 2.396851  | -2.102425 | 6.465975  | C | -4.897137 | 3.032147  | 2.528047  |
| C                              | 2.142875  | -3.157391 | 4.586800  | C | -4.512241 | 1.101455  | 1.029535  |
| H                              | 3.033429  | -3.784393 | 4.649198  | C | -4.490894 | 4.236909  | 3.054970  |
| H                              | 1.302135  | -3.746307 | 4.984391  | H | -2.945518 | 5.759545  | 3.053204  |
| C                              | 1.831356  | -2.885686 | 3.125537  | H | -5.819590 | 2.564165  | 2.863872  |
| N                              | 1.022288  | -1.843180 | 2.892926  | H | -5.459287 | 0.679310  | 1.355406  |
| H                              | 0.671064  | -1.681954 | 1.935479  | H | -5.092394 | 4.736232  | 3.809658  |
| C                              | 0.864668  | -3.742969 | -1.170634 | C | -4.163350 | -0.952591 | -0.367291 |
| C                              | 2.218781  | -3.232573 | -0.998548 | C | -4.572036 | -1.086017 | -1.718383 |
| H                              | 0.724663  | -4.802883 | -1.369390 | C | -4.221514 | -2.072445 | 0.495885  |
| C                              | 0.288821  | 2.303385  | -0.569203 | C | -5.025568 | -2.328402 | -2.170921 |
| C                              | -0.952752 | 2.925025  | -0.581079 | C | -4.692864 | -3.290884 | -0.010965 |
| C                              | -1.080495 | 4.181163  | -1.273245 | C | -5.097399 | -3.447128 | -1.336102 |
| C                              | 0.097951  | 4.808250  | -1.792936 | H | -5.339435 | -2.420226 | -3.207830 |
| C                              | 1.352836  | 4.165174  | -1.641550 | H | -4.743460 | -4.151724 | 0.652091  |
|                                |           |           |           | C | 2.827636  | 2.274147  | -0.933393 |

|   |           |           |           |   |           |           |           |
|---|-----------|-----------|-----------|---|-----------|-----------|-----------|
| C | 3.506639  | 2.338182  | 0.307384  | H | -5.750039 | -1.360917 | 2.718237  |
| C | 3.456639  | 1.677396  | -2.050959 | H | -4.688779 | -2.065292 | 3.953760  |
| C | 4.802585  | 1.820941  | 0.400830  | H | -5.508002 | -3.111226 | 2.780885  |
| C | 4.755931  | 1.171958  | -1.899797 | C | -2.727895 | -3.076125 | 2.299994  |
| C | 5.451081  | 1.235915  | -0.690241 | H | -1.859591 | -2.966768 | 1.644809  |
| H | 5.323677  | 1.888721  | 1.352556  | H | -3.117253 | -4.096174 | 2.198452  |
| H | 5.250586  | 0.726926  | -2.760221 | H | -2.392866 | -2.953357 | 3.337206  |
| O | -1.706574 | 0.281815  | -1.153410 | C | 2.787556  | 1.604340  | -3.424395 |
| O | 0.416029  | 1.065077  | 0.039452  | H | 1.719797  | 1.797136  | -3.286395 |
| P | -0.247386 | -0.278285 | -0.642710 | C | 2.908339  | 0.218054  | -4.082578 |
| O | -0.356529 | -1.289379 | 0.466261  | H | 2.322685  | 0.195583  | -5.009132 |
| C | -4.575961 | 0.086109  | -2.700770 | H | 2.522778  | -0.562560 | -3.423423 |
| H | -4.184535 | 0.967965  | -2.186640 | H | 3.944471  | -0.024528 | -4.348334 |
| C | -6.009332 | 0.435192  | -3.149781 | C | 3.346624  | 2.689880  | -4.367702 |
| H | -6.651412 | 0.658605  | -2.290155 | H | 4.420978  | 2.546094  | -4.537475 |
| H | -6.470639 | -0.390617 | -3.704350 | H | 3.206972  | 3.695564  | -3.957580 |
| H | -6.001193 | 1.313457  | -3.806816 | H | 2.843556  | 2.649444  | -5.341587 |
| C | -3.660335 | -0.172775 | -3.912607 | C | 6.883109  | 0.724229  | -0.586651 |
| H | -2.635180 | -0.376431 | -3.590071 | H | 7.111832  | 0.212930  | -1.532685 |
| H | -3.644084 | 0.704853  | -4.570557 | C | 7.881584  | 1.890247  | -0.442717 |
| H | -4.009635 | -1.025151 | -4.508153 | H | 8.914219  | 1.520390  | -0.423966 |
| C | -5.599943 | -4.792615 | -1.843159 | H | 7.706304  | 2.444112  | 0.487395  |
| H | -5.554652 | -5.492272 | -0.997031 | H | 7.786426  | 2.597164  | -1.274150 |
| C | -7.068430 | -4.722300 | -2.303631 | C | 7.070583  | -0.298069 | 0.549594  |
| H | -7.427361 | -5.713251 | -2.607584 | H | 8.095816  | -0.687853 | 0.551510  |
| H | -7.184690 | -4.049053 | -3.161290 | H | 6.383644  | -1.145563 | 0.446761  |
| H | -7.717489 | -4.354898 | -1.501143 | H | 6.890187  | 0.155483  | 1.531116  |
| C | -4.699591 | -5.359596 | -2.957448 | C | 2.889297  | 2.991327  | 1.543567  |
| H | -3.660805 | -5.446469 | -2.620239 | H | 1.855027  | 3.256744  | 1.308390  |
| H | -4.708675 | -4.714320 | -3.843882 | C | 2.842345  | 2.029409  | 2.744842  |
| H | -5.044148 | -6.354255 | -3.265967 | H | 3.848171  | 1.753361  | 3.084285  |
| C | -3.794201 | -2.016660 | 1.962867  | H | 2.305504  | 1.111697  | 2.487407  |
| H | -3.337386 | -1.040367 | 2.145817  | H | 2.324426  | 2.497530  | 3.590193  |
| C | -5.006670 | -2.143925 | 2.906912  | C | 3.618836  | 4.300569  | 1.904502  |

|                                |           |           |           |   |           |           |           |
|--------------------------------|-----------|-----------|-----------|---|-----------|-----------|-----------|
| H                              | 3.598722  | 5.008277  | 1.067981  | H | 0.510611  | 7.546454  | -3.444127 |
| H                              | 4.669263  | 4.116022  | 2.160060  | H | -1.670115 | 7.081383  | -2.323484 |
| H                              | 3.143475  | 4.781047  | 2.768464  | C | -1.226276 | 2.981075  | 0.515227  |
| O                              | 0.479788  | -0.656538 | -1.920073 | C | -1.645837 | 3.943040  | 1.498507  |
| S                              | 2.442380  | -3.889369 | 1.918755  | C | -1.956406 | 1.808771  | 0.372781  |
| O                              | 1.098073  | -3.013363 | -2.406670 | C | -0.874142 | 5.086756  | 1.847853  |
| H                              | 0.099887  | -3.301745 | -0.535100 | C | -2.880235 | 3.729385  | 2.190250  |
| H                              | 2.283289  | -2.222926 | -0.614057 | C | -3.198491 | 1.587264  | 1.037649  |
| C                              | 3.456371  | -3.893628 | -1.378616 | C | -1.316506 | 5.979395  | 2.799563  |
| C                              | 3.523292  | -5.271960 | -1.652519 | H | 0.082428  | 5.247806  | 1.364594  |
| C                              | 4.627290  | -3.116653 | -1.465069 | C | -3.317973 | 4.678230  | 3.153720  |
| C                              | 4.735023  | -5.856894 | -2.005796 | C | -3.638422 | 2.567085  | 1.905405  |
| H                              | 2.631624  | -5.885919 | -1.578544 | C | -2.556563 | 5.784076  | 3.453036  |
| C                              | 5.836584  | -3.704953 | -1.822337 | H | -0.703887 | 6.840063  | 3.054361  |
| H                              | 4.576310  | -2.050576 | -1.259638 | H | -4.264052 | 4.503474  | 3.660579  |
| C                              | 5.891452  | -5.075216 | -2.092321 | H | -4.595681 | 2.436155  | 2.402889  |
| H                              | 4.781270  | -6.922280 | -2.211111 | H | -2.896426 | 6.499906  | 4.196478  |
| H                              | 6.734848  | -3.098399 | -1.888952 | C | -4.073055 | 0.390733  | 0.793930  |
| H                              | 6.836074  | -5.535938 | -2.368003 | C | -4.895895 | 0.354088  | -0.358533 |
|                                |           |           |           | C | -4.183593 | -0.625505 | 1.772284  |
|                                |           |           |           | C | -5.828515 | -0.680730 | -0.495178 |
|                                |           |           |           | C | -5.131207 | -1.639542 | 1.580461  |
|                                |           |           |           | C | -5.974103 | -1.683554 | 0.468815  |
|                                |           |           |           | H | -6.476460 | -0.686325 | -1.368649 |
|                                |           |           |           | H | -5.231226 | -2.414300 | 2.337115  |
|                                |           |           |           | C | 3.426821  | 1.592394  | -0.920978 |
|                                |           |           |           | C | 4.207801  | 1.547507  | 0.259848  |
|                                |           |           |           | C | 3.828616  | 0.852284  | -2.059726 |
|                                |           |           |           | C | 5.381212  | 0.785164  | 0.270305  |
|                                |           |           |           | C | 5.019694  | 0.115883  | -1.996242 |
|                                |           |           |           | C | 5.819143  | 0.075275  | -0.851714 |
|                                |           |           |           | H | 5.983799  | 0.768843  | 1.174935  |
|                                |           |           |           | H | 5.344681  | -0.434683 | -2.876170 |
|                                |           |           |           | O | -1.497506 | 0.841239  | -0.517805 |
| <b>TS2-R E= -3768.22513512</b> |           |           |           |   |           |           |           |
| C                              | 1.014272  | 2.295212  | -0.332876 |   |           |           |           |
| C                              | -0.022539 | 3.217868  | -0.330377 |   |           |           |           |
| C                              | 0.086143  | 4.385737  | -1.162186 |   |           |           |           |
| C                              | 1.319410  | 4.632865  | -1.844681 |   |           |           |           |
| C                              | 2.381595  | 3.705042  | -1.709017 |   |           |           |           |
| C                              | 2.253375  | 2.526296  | -1.001167 |   |           |           |           |
| H                              | -1.940840 | 5.109406  | -0.891904 |   |           |           |           |
| C                              | -0.986087 | 5.298377  | -1.368536 |   |           |           |           |
| C                              | 1.452368  | 5.793722  | -2.654071 |   |           |           |           |
| H                              | 3.327666  | 3.925089  | -2.195630 |   |           |           |           |
| C                              | 0.401325  | 6.666265  | -2.816499 |   |           |           |           |
| C                              | -0.832721 | 6.404917  | -2.174906 |   |           |           |           |
| H                              | 2.401071  | 5.970232  | -3.155583 |   |           |           |           |

|   |           |           |           |   |           |           |           |
|---|-----------|-----------|-----------|---|-----------|-----------|-----------|
| O | 0.873389  | 1.134708  | 0.418202  | H | 2.048402  | 1.279313  | -3.161290 |
| P | -0.171661 | -0.036093 | -0.092413 | C | 2.796455  | -0.565582 | -3.924014 |
| O | -0.417009 | -0.977812 | 1.044842  | H | 2.125595  | -0.515299 | -4.789729 |
| C | -4.840878 | 1.442086  | -1.432008 | H | 2.335637  | -1.216336 | -3.177555 |
| H | -4.054985 | 2.150452  | -1.156857 | H | 3.728805  | -1.034942 | -4.261545 |
| C | -6.158992 | 2.239014  | -1.493790 | C | 3.717866  | 1.724906  | -4.439403 |
| H | -6.397593 | 2.684305  | -0.521379 | H | 4.714219  | 1.336276  | -4.684211 |
| H | -7.002571 | 1.601671  | -1.784503 | H | 3.838463  | 2.760897  | -4.106816 |
| H | -6.083513 | 3.048526  | -2.229987 | H | 3.125088  | 1.734063  | -5.362227 |
| C | -4.466362 | 0.877213  | -2.814940 | C | 7.149575  | -0.668468 | -0.863372 |
| H | -3.501256 | 0.361693  | -2.779433 | H | 7.182216  | -1.254299 | -1.792690 |
| H | -4.391162 | 1.687886  | -3.549845 | C | 8.331504  | 0.321703  | -0.903077 |
| H | -5.220998 | 0.170333  | -3.181594 | H | 9.286361  | -0.213944 | -0.972075 |
| C | -7.052657 | -2.755224 | 0.362852  | H | 8.356377  | 0.938737  | 0.003225  |
| H | -6.856517 | -3.486497 | 1.159138  | H | 8.254538  | 0.996036  | -1.763017 |
| C | -8.449548 | -2.155803 | 0.623644  | C | 7.302770  | -1.653334 | 0.308413  |
| H | -9.217763 | -2.938829 | 0.610776  | H | 8.245122  | -2.207787 | 0.221959  |
| H | -8.709678 | -1.417309 | -0.144441 | H | 6.481878  | -2.377366 | 0.334417  |
| H | -8.489229 | -1.652918 | 1.596169  | H | 7.313190  | -1.135219 | 1.274249  |
| C | -7.026096 | -3.516896 | -0.973829 | C | 3.845906  | 2.347789  | 1.511485  |
| H | -6.043646 | -3.961802 | -1.161096 | H | 2.918609  | 2.891591  | 1.312853  |
| H | -7.261314 | -2.856188 | -1.817150 | C | 3.579881  | 1.434853  | 2.722814  |
| H | -7.772973 | -4.320004 | -0.970201 | H | 4.464664  | 0.844599  | 2.989360  |
| C | -3.351871 | -0.626053 | 3.056338  | H | 2.758573  | 0.743207  | 2.511993  |
| H | -2.562296 | 0.122623  | 2.947064  | H | 3.302004  | 2.035026  | 3.597928  |
| C | -4.216827 | -0.227335 | 4.270247  | C | 4.920998  | 3.405103  | 1.832887  |
| H | -4.682456 | 0.754486  | 4.131735  | H | 5.080563  | 4.077944  | 0.982716  |
| H | -3.605717 | -0.186219 | 5.180120  | H | 5.884471  | 2.942186  | 2.077185  |
| H | -5.020304 | -0.955058 | 4.438105  | H | 4.615878  | 4.011733  | 2.694221  |
| C | -2.650445 | -1.971682 | 3.316663  | O | 0.342396  | -0.634063 | -1.407967 |
| H | -1.972806 | -2.217559 | 2.496440  | C | -2.698975 | -2.788746 | -1.683259 |
| H | -3.365200 | -2.792563 | 3.450635  | C | -1.656833 | -3.696497 | -1.490711 |
| H | -2.052430 | -1.906006 | 4.233715  | C | -1.561295 | -4.868137 | -2.261385 |
| C | 3.033370  | 0.851414  | -3.367381 | C | -2.519076 | -5.103653 | -3.246332 |

|   |           |           |           |                                |           |           |           |
|---|-----------|-----------|-----------|--------------------------------|-----------|-----------|-----------|
| C | -3.564115 | -4.199945 | -3.454929 |                                |           |           |           |
| C | -3.650568 | -3.048367 | -2.670726 |                                |           |           |           |
| H | -2.765909 | -1.891118 | -1.076652 |                                |           |           |           |
| H | -2.445003 | -6.003238 | -3.853239 |                                |           |           |           |
| H | -4.303327 | -4.393206 | -4.227017 |                                |           |           |           |
| H | -4.456279 | -2.338548 | -2.825025 |                                |           |           |           |
| C | -0.398403 | -5.787218 | -1.969609 |                                |           |           |           |
| H | -0.619372 | -6.426331 | -1.101386 |                                |           |           |           |
| H | -0.203894 | -6.454501 | -2.815763 |                                |           |           |           |
| C | 0.843133  | -4.929465 | -1.687192 |                                |           |           |           |
| H | 1.721087  | -5.537388 | -1.456406 |                                |           |           |           |
| H | 1.072106  | -4.330233 | -2.573973 |                                |           |           |           |
| C | 0.569583  | -3.968154 | -0.534354 |                                |           |           |           |
| S | 1.263802  | -4.316797 | 1.095489  |                                |           |           |           |
| N | -0.696683 | -3.492589 | -0.466255 |                                |           |           |           |
| H | -0.857151 | -2.742997 | 0.218433  |                                |           |           |           |
| C | 2.940964  | -3.619805 | 0.753892  |                                |           |           |           |
| C | 2.662208  | -2.324650 | -0.020923 |                                |           |           |           |
| H | 2.271616  | -1.556181 | 0.651280  |                                |           |           |           |
| H | 3.580662  | -1.957489 | -0.491395 |                                |           |           |           |
| O | 1.713021  | -2.619343 | -1.046654 |                                |           |           |           |
| H | 1.055939  | -1.697870 | -1.234865 |                                |           |           |           |
| H | 3.480200  | -4.319453 | 0.107184  |                                |           |           |           |
| C | 3.705645  | -3.427946 | 2.044015  |                                |           |           |           |
| C | 4.907788  | -4.115886 | 2.252638  |                                |           |           |           |
| C | 3.231120  | -2.568372 | 3.047608  |                                |           |           |           |
| C | 5.634288  | -3.940003 | 3.431857  |                                |           |           |           |
| H | 5.277176  | -4.794287 | 1.486954  |                                |           |           |           |
| C | 3.956872  | -2.393763 | 4.225370  |                                |           |           |           |
| H | 2.288047  | -2.046096 | 2.910751  |                                |           |           |           |
| C | 5.160692  | -3.076392 | 4.420190  |                                |           |           |           |
| H | 6.565963  | -4.479883 | 3.577203  |                                |           |           |           |
| H | 3.578581  | -1.725350 | 4.993757  |                                |           |           |           |
| H | 5.722941  | -2.938821 | 5.339825  |                                |           |           |           |
|   |           |           |           | <b>TS2-S E= -3768.22276445</b> |           |           |           |
|   |           |           |           | C                              | -0.373564 | 2.588361  | 0.212130  |
|   |           |           |           | C                              | 0.835428  | 3.234268  | 0.429480  |
|   |           |           |           | C                              | 0.876343  | 4.335874  | 1.351965  |
|   |           |           |           | C                              | -0.354288 | 4.830505  | 1.889218  |
|   |           |           |           | C                              | -1.569595 | 4.200656  | 1.523648  |
|   |           |           |           | C                              | -1.612445 | 3.071557  | 0.729268  |
|   |           |           |           | H                              | 3.032637  | 4.559570  | 1.418577  |
|   |           |           |           | C                              | 2.087761  | 4.944021  | 1.784888  |
|   |           |           |           | C                              | -0.334231 | 5.931968  | 2.787501  |
|   |           |           |           | H                              | -2.500993 | 4.612600  | 1.902213  |
|   |           |           |           | C                              | 0.854214  | 6.508485  | 3.171848  |
|   |           |           |           | C                              | 2.076052  | 5.997770  | 2.672374  |
|   |           |           |           | H                              | -1.280107 | 6.300776  | 3.177358  |
|   |           |           |           | H                              | 0.859417  | 7.344687  | 3.865633  |
|   |           |           |           | H                              | 3.015315  | 6.438314  | 2.995789  |
|   |           |           |           | C                              | 2.058756  | 2.782517  | -0.290660 |
|   |           |           |           | C                              | 2.805820  | 3.691179  | -1.118423 |
|   |           |           |           | C                              | 2.482007  | 1.463568  | -0.192397 |
|   |           |           |           | C                              | 2.362225  | 5.007691  | -1.428268 |
|   |           |           |           | C                              | 4.037969  | 3.245849  | -1.693133 |
|   |           |           |           | C                              | 3.713895  | 1.005431  | -0.745462 |
|   |           |           |           | C                              | 3.111841  | 5.840350  | -2.230037 |
|   |           |           |           | H                              | 1.412895  | 5.352604  | -1.036070 |
|   |           |           |           | C                              | 4.797974  | 4.135179  | -2.500659 |
|   |           |           |           | C                              | 4.470266  | 1.918471  | -1.453901 |
|   |           |           |           | C                              | 4.349422  | 5.408600  | -2.763798 |
|   |           |           |           | H                              | 2.745988  | 6.837713  | -2.458850 |
|   |           |           |           | H                              | 5.737372  | 3.781381  | -2.918919 |
|   |           |           |           | H                              | 5.427880  | 1.603308  | -1.859260 |
|   |           |           |           | H                              | 4.933702  | 6.078377  | -3.388811 |
|   |           |           |           | C                              | 4.264537  | -0.379119 | -0.551980 |
|   |           |           |           | C                              | 4.928013  | -0.702944 | 0.656393  |

|   |           |           |           |   |           |           |           |
|---|-----------|-----------|-----------|---|-----------|-----------|-----------|
| C | 4.261770  | -1.301932 | -1.624960 | C | 6.142147  | -4.984881 | 0.992407  |
| C | 5.610272  | -1.921948 | 0.750800  | H | 5.075656  | -5.228145 | 1.032624  |
| C | 4.955992  | -2.509361 | -1.472365 | H | 6.407292  | -4.475892 | 1.927346  |
| C | 5.652310  | -2.835533 | -0.307306 | H | 6.707949  | -5.923907 | 0.960425  |
| H | 6.145388  | -2.149481 | 1.669801  | C | 3.572665  | -1.007535 | -2.958656 |
| H | 4.971882  | -3.215001 | -2.299785 | H | 2.928156  | -0.135228 | -2.818433 |
| C | -2.942485 | 2.450642  | 0.414126  | C | 4.605368  | -0.664149 | -4.052361 |
| C | -3.504416 | 2.595230  | -0.878871 | H | 5.226528  | 0.192530  | -3.770293 |
| C | -3.694522 | 1.825495  | 1.439592  | H | 4.099129  | -0.418093 | -4.993757 |
| C | -4.804688 | 2.133032  | -1.111663 | H | 5.275390  | -1.511637 | -4.243372 |
| C | -4.997148 | 1.393531  | 1.152301  | C | 2.661053  | -2.155834 | -3.428092 |
| C | -5.579822 | 1.543457  | -0.108323 | H | 1.887454  | -2.363459 | -2.685996 |
| H | -5.232444 | 2.266060  | -2.102079 | H | 3.222753  | -3.076660 | -3.625151 |
| H | -5.583670 | 0.932559  | 1.944192  | H | 2.159407  | -1.871980 | -4.360880 |
| O | 1.709286  | 0.568218  | 0.543443  | C | -3.154194 | 1.620060  | 2.856903  |
| O | -0.392537 | 1.474431  | -0.617095 | H | -2.090905 | 1.874012  | 2.852607  |
| P | 0.281879  | 0.060827  | -0.097280 | C | -3.258405 | 0.155522  | 3.324456  |
| O | 0.445749  | -0.837926 | -1.282516 | H | -2.795108 | 0.046145  | 4.312292  |
| C | 4.969734  | 0.259346  | 1.843956  | H | -2.741845 | -0.516588 | 2.635245  |
| H | 4.370212  | 1.137849  | 1.590256  | H | -4.301354 | -0.173056 | 3.414195  |
| C | 6.402639  | 0.758458  | 2.115770  | C | -3.857544 | 2.549898  | 3.867013  |
| H | 6.828204  | 1.241033  | 1.228723  | H | -4.930287 | 2.328940  | 3.927877  |
| H | 7.069114  | -0.064725 | 2.399681  | H | -3.752676 | 3.604635  | 3.591354  |
| H | 6.406370  | 1.487945  | 2.934868  | H | -3.431552 | 2.419104  | 4.869124  |
| C | 4.344681  | -0.356347 | 3.110001  | C | -7.026761 | 1.128999  | -0.349059 |
| H | 3.310293  | -0.664421 | 2.926616  | H | -7.348504 | 0.557888  | 0.532792  |
| H | 4.341381  | 0.374902  | 3.927418  | C | -7.941260 | 2.366231  | -0.456044 |
| H | 4.908090  | -1.232309 | 3.454334  | H | -8.990303 | 2.065587  | -0.566658 |
| C | 6.473434  | -4.117882 | -0.234790 | H | -7.673594 | 2.978636  | -1.325589 |
| H | 6.224542  | -4.707156 | -1.128077 | H | -7.858513 | 2.998521  | 0.434767  |
| C | 7.983131  | -3.808466 | -0.294230 | C | -7.199265 | 0.214686  | -1.574866 |
| H | 8.569826  | -4.735319 | -0.304970 | H | -8.247075 | -0.091431 | -1.678096 |
| H | 8.298630  | -3.221470 | 0.576925  | H | -6.592348 | -0.692433 | -1.485647 |
| H | 8.234479  | -3.233426 | -1.192207 | H | -6.914361 | 0.725332  | -2.502500 |





|   |           |           |           |   |           |           |           |
|---|-----------|-----------|-----------|---|-----------|-----------|-----------|
| C | 1.464921  | 2.049219  | -0.516763 | H | 3.618946  | 2.740112  | 0.909557  |
| C | -0.073863 | 5.189128  | -1.867355 | C | 5.701469  | 2.888318  | 1.338059  |
| C | 2.086089  | 4.117316  | -2.287355 | H | 5.976737  | 3.326401  | 0.371894  |
| C | 2.711202  | 2.005717  | -1.207778 | H | 6.547425  | 2.281405  | 1.681795  |
| C | 0.225391  | 6.157299  | -2.800871 | H | 5.566341  | 3.705935  | 2.056611  |
| H | -1.031128 | 5.209936  | -1.359734 | C | 3.992204  | 1.482527  | 2.592802  |
| C | 2.372861  | 5.141920  | -3.229993 | H | 3.045258  | 0.940601  | 2.514834  |
| C | 2.999778  | 3.059004  | -2.051890 | H | 3.868165  | 2.292228  | 3.322695  |
| C | 1.465553  | 6.144832  | -3.482221 | H | 4.742485  | 0.787680  | 2.987655  |
| H | -0.500400 | 6.936138  | -3.018610 | C | 6.834886  | -2.073042 | -0.422929 |
| H | 3.322241  | 5.108564  | -3.759225 | H | 6.742957  | -2.786428 | -1.253940 |
| H | 3.957795  | 3.075871  | -2.564015 | C | 8.235995  | -1.437432 | -0.516393 |
| H | 1.691969  | 6.918990  | -4.210194 | H | 9.016513  | -2.204789 | -0.444085 |
| C | 3.721933  | 0.916950  | -0.986267 | H | 8.398453  | -0.717853 | 0.294993  |
| C | 4.540891  | 0.958040  | 0.167399  | H | 8.366695  | -0.905019 | -1.464953 |
| C | 3.913078  | -0.098705 | -1.952678 | C | 6.678635  | -2.866751 | 0.887170  |
| C | 5.526030  | -0.020286 | 0.335151  | H | 5.692095  | -3.337763 | 0.955146  |
| C | 4.920404  | -1.048318 | -1.736626 | H | 6.789905  | -2.218836 | 1.764232  |
| C | 5.736830  | -1.032798 | -0.604076 | H | 7.440785  | -3.652731 | 0.955245  |
| H | 6.150984  | 0.017023  | 1.223949  | C | 3.085522  | -0.168146 | -3.237328 |
| H | 5.081387  | -1.826997 | -2.478370 | H | 2.174238  | 0.416154  | -3.078508 |
| C | -3.789886 | 1.080945  | 0.914248  | C | 3.848833  | 0.452200  | -4.426363 |
| C | -4.579738 | 0.961922  | -0.254589 | H | 4.109092  | 1.498944  | -4.241209 |
| C | -4.020746 | 0.220937  | 2.013963  | H | 3.239843  | 0.412786  | -5.338076 |
| C | -5.571174 | -0.022420 | -0.306018 | H | 4.780636  | -0.093478 | -4.619919 |
| C | -5.033428 | -0.741315 | 1.909718  | C | 2.641294  | -1.597700 | -3.595758 |
| C | -5.816637 | -0.886968 | 0.764338  | H | 2.148066  | -2.081382 | -2.749311 |
| H | -6.175990 | -0.107523 | -1.205646 | H | 3.483527  | -2.225867 | -3.908963 |
| H | -5.217916 | -1.403767 | 2.751760  | H | 1.932217  | -1.568227 | -4.431695 |
| O | 1.156807  | 0.999588  | 0.351123  | C | -3.235197 | 0.328167  | 3.321969  |
| O | -1.263270 | 0.992553  | -0.470958 | H | -2.348570 | 0.940412  | 3.131010  |
| P | -0.044414 | -0.019322 | -0.081152 | C | -2.738433 | -1.032240 | 3.844133  |
| O | 0.288054  | -0.844882 | -1.286090 | H | -2.098507 | -0.881399 | 4.721836  |
| C | 4.410202  | 2.054070  | 1.225346  | H | -2.154539 | -1.564489 | 3.089734  |

|   |           |           |           |                                |           |           |           |
|---|-----------|-----------|-----------|--------------------------------|-----------|-----------|-----------|
| H | -3.565716 | -1.680823 | 4.156008  | H                              | -5.063026 | -3.491716 | -4.285681 |
| C | -4.070416 | 1.036098  | 4.409634  | H                              | -3.516355 | -1.552498 | -4.523795 |
| H | -4.974579 | 0.460940  | 4.644116  | C                              | -2.169558 | -5.642728 | -1.253818 |
| H | -4.387195 | 2.036475  | 4.096175  | H                              | -2.517888 | -5.397717 | -0.242220 |
| H | -3.489131 | 1.139367  | 5.334113  | H                              | -2.638058 | -6.590879 | -1.537521 |
| C | -6.902599 | -1.952947 | 0.696712  | C                              | -0.646621 | -5.805951 | -1.220350 |
| H | -6.900793 | -2.475581 | 1.663101  | H                              | -0.323018 | -6.446706 | -0.398505 |
| C | -8.302984 | -1.339318 | 0.508027  | H                              | -0.286244 | -6.261856 | -2.156165 |
| H | -9.073566 | -2.119824 | 0.523752  | C                              | 0.055345  | -4.482375 | -1.087209 |
| H | -8.382007 | -0.813709 | -0.451239 | N                              | -0.440803 | -3.432472 | -1.721440 |
| H | -8.529900 | -0.619309 | 1.302017  | H                              | -0.012638 | -2.492463 | -1.599558 |
| C | -6.607807 | -3.001075 | -0.393238 | C                              | 1.934988  | -3.639029 | 0.229825  |
| H | -7.367163 | -3.792964 | -0.384090 | H                              | 1.760593  | -2.603719 | -0.071978 |
| H | -5.626225 | -3.462879 | -0.242316 | C                              | 1.364422  | -3.964735 | 1.620343  |
| H | -6.608513 | -2.547945 | -1.391769 | H                              | 1.470238  | -5.049785 | 1.736162  |
| C | -4.423665 | 1.908287  | -1.445280 | S                              | -0.444578 | -3.640483 | 1.597002  |
| H | -3.588533 | 2.583270  | -1.238654 | H                              | -0.412285 | -1.890754 | 1.299701  |
| C | -4.082530 | 1.157842  | -2.745303 | C                              | 2.201585  | -3.321965 | 2.722186  |
| H | -4.890171 | 0.478601  | -3.043409 | C                              | 3.370375  | -3.987540 | 3.126928  |
| H | -3.170890 | 0.565974  | -2.620818 | C                              | 1.873131  | -2.113607 | 3.347296  |
| H | -3.924419 | 1.868325  | -3.566211 | C                              | 4.193219  | -3.461893 | 4.123120  |
| C | -5.675969 | 2.790019  | -1.623373 | H                              | 3.630467  | -4.938851 | 2.665737  |
| H | -5.885657 | 3.366623  | -0.715359 | C                              | 2.694152  | -1.587710 | 4.347828  |
| H | -6.563563 | 2.185976  | -1.846384 | H                              | 0.968422  | -1.588585 | 3.065459  |
| H | -5.535521 | 3.496608  | -2.450704 | C                              | 3.855460  | -2.255383 | 4.739261  |
| O | -0.389607 | -0.749100 | 1.238830  | H                              | 5.087655  | -4.000649 | 4.425433  |
| C | -2.040336 | -2.368919 | -3.195122 | H                              | 2.416921  | -0.652522 | 4.826906  |
| C | -1.702953 | -3.448885 | -2.374453 | H                              | 4.485799  | -1.845417 | 5.524101  |
| C | -2.569233 | -4.541090 | -2.209072 | H                              | 3.001562  | -3.863124 | 0.154012  |
| C | -3.776057 | -4.537453 | -2.909424 | O                              | 1.322519  | -4.564163 | -0.712233 |
| C | -4.120899 | -3.472732 | -3.745550 |                                |           |           |           |
| C | -3.253307 | -2.387689 | -3.882078 | <b>TS3-S E= -3768.23019491</b> |           |           |           |
| H | -1.356891 | -1.530494 | -3.283909 | C                              | -2.240219 | 1.703964  | 0.407630  |
| H | -4.453927 | -5.379907 | -2.794778 | C                              | -1.652785 | 2.952438  | 0.556813  |

|   |           |          |           |   |           |           |           |
|---|-----------|----------|-----------|---|-----------|-----------|-----------|
| C | -2.201805 | 3.851931 | 1.537481  | H | 5.631418  | 1.328754  | 1.379384  |
| C | -3.418265 | 3.491608 | 2.200735  | H | 5.283170  | 0.312057  | -2.757569 |
| C | -4.029188 | 2.247802 | 1.902719  | C | -4.139395 | 0.014522  | 0.794420  |
| C | -3.455893 | 1.326968 | 1.049258  | C | -4.847461 | -0.186368 | -0.415345 |
| H | -0.631142 | 5.346117 | 1.452436  | C | -4.153822 | -0.986500 | 1.794620  |
| C | -1.574387 | 5.073382 | 1.910769  | C | -5.564603 | -1.373598 | -0.592929 |
| C | -3.984020 | 4.378436 | 3.156764  | C | -4.891812 | -2.154390 | 1.563354  |
| H | -4.973307 | 2.003999 | 2.381914  | C | -5.607601 | -2.370572 | 0.385553  |
| C | -3.361870 | 5.562525 | 3.478205  | H | -6.115291 | -1.516982 | -1.519583 |
| C | -2.137532 | 5.902789 | 2.855961  | H | -4.911867 | -2.924015 | 2.331277  |
| H | -4.914410 | 4.092372 | 3.641596  | O | 0.649831  | 1.347876  | 0.431970  |
| H | -3.798775 | 6.229292 | 4.216504  | O | -1.671290 | 0.794437  | -0.481694 |
| H | -1.632764 | 6.825270 | 3.129972  | P | -0.238537 | 0.094278  | -0.139412 |
| C | -0.471139 | 3.339248 | -0.267798 | O | 0.316591  | -0.474721 | -1.412351 |
| C | -0.476150 | 4.532524 | -1.071737 | C | 3.389493  | 2.755144  | 1.678748  |
| C | 0.666697  | 2.545078 | -0.276276 | H | 2.433244  | 3.240200  | 1.465577  |
| C | -1.641827 | 5.319104 | -1.287679 | C | 4.370469  | 3.870493  | 2.094193  |
| C | 0.736852  | 4.936764 | -1.716415 | H | 4.512863  | 4.595097  | 1.284535  |
| C | 1.888794  | 2.932929 | -0.899185 | H | 5.355124  | 3.465850  | 2.356802  |
| C | -1.599388 | 6.454901 | -2.066357 | H | 3.987549  | 4.408606  | 2.969692  |
| H | -2.579079 | 5.009014 | -0.840896 | C | 3.145569  | 1.770878  | 2.838327  |
| C | 0.752421  | 6.124928 | -2.496779 | H | 2.383881  | 1.033150  | 2.566932  |
| C | 1.898270  | 4.136482 | -1.575481 | H | 2.791947  | 2.308911  | 3.726202  |
| C | -0.389020 | 6.873325 | -2.668353 | H | 4.061946  | 1.236775  | 3.117083  |
| H | -2.506231 | 7.032646 | -2.223311 | C | 6.986541  | 0.062684  | -0.662082 |
| H | 1.685725  | 6.422946 | -2.968674 | H | 7.062618  | -0.544366 | -1.575233 |
| H | 2.821888  | 4.474813 | -2.037487 | C | 8.104251  | 1.124536  | -0.723143 |
| H | -0.367877 | 7.775456 | -3.273535 | H | 9.091563  | 0.648691  | -0.768180 |
| C | 3.141185  | 2.110110 | -0.810260 | H | 8.079910  | 1.767770  | 0.164859  |
| C | 3.861067  | 2.046216 | 0.408498  | H | 7.993180  | 1.767142  | -1.603456 |
| C | 3.654546  | 1.467682 | -1.963400 | C | 7.198015  | -0.877856 | 0.536932  |
| C | 5.078010  | 1.356181 | 0.444555  | H | 6.426851  | -1.653584 | 0.591373  |
| C | 4.879405  | 0.793406 | -1.869239 | H | 7.185643  | -0.332353 | 1.487610  |
| C | 5.615351  | 0.729340 | -0.683897 | H | 8.171906  | -1.375710 | 0.460379  |

|   |           |           |           |   |           |           |           |
|---|-----------|-----------|-----------|---|-----------|-----------|-----------|
| C | 2.944210  | 1.503310  | -3.318241 | H | -3.261333 | -0.009704 | -2.686634 |
| H | 1.963023  | 1.963441  | -3.174290 | H | -4.278533 | 1.121391  | -3.603008 |
| C | 3.721821  | 2.369432  | -4.330198 | C | -6.314717 | 1.405890  | -1.741091 |
| H | 3.871162  | 3.389233  | -3.958351 | H | -6.723554 | 1.825587  | -0.815063 |
| H | 3.178330  | 2.431489  | -5.280820 | H | -6.998035 | 0.618021  | -2.079761 |
| H | 4.711911  | 1.945727  | -4.537789 | H | -6.314414 | 2.195959  | -2.502073 |
| C | 2.691488  | 0.096538  | -3.892199 | O | -0.392408 | -0.826574 | 1.083011  |
| H | 2.070466  | -0.489383 | -3.210095 | C | -1.365125 | -2.946157 | -3.029330 |
| H | 3.625073  | -0.448618 | -4.076349 | C | -0.512719 | -3.752765 | -2.268301 |
| H | 2.162270  | 0.173230  | -4.849961 | C | -0.819938 | -5.097952 | -2.009251 |
| C | -3.416604 | -0.834534 | 3.126145  | C | -1.989225 | -5.625063 | -2.559910 |
| H | -2.737456 | 0.018497  | 3.039132  | C | -2.842653 | -4.835926 | -3.334373 |
| C | -2.550740 | -2.060200 | 3.471398  | C | -2.531400 | -3.493519 | -3.559968 |
| H | -1.968692 | -1.861596 | 4.379136  | H | -1.110342 | -1.903641 | -3.191834 |
| H | -1.848925 | -2.286300 | 2.665579  | H | -2.235026 | -6.667856 | -2.372890 |
| H | -3.158608 | -2.952418 | 3.663409  | H | -3.746470 | -5.266854 | -3.754832 |
| C | -4.400366 | -0.536761 | 4.276729  | H | -3.194273 | -2.867866 | -4.150084 |
| H | -5.107277 | -1.364322 | 4.413991  | C | 0.096105  | -5.897904 | -1.109505 |
| H | -4.985377 | 0.369949  | 4.088254  | H | -0.243535 | -5.811067 | -0.069395 |
| H | -3.857910 | -0.399182 | 5.220115  | H | 0.061267  | -6.961169 | -1.369567 |
| C | -6.427729 | -3.641040 | 0.199449  | C | 1.539457  | -5.391962 | -1.200193 |
| H | -6.204227 | -4.295581 | 1.053128  | H | 2.164880  | -5.802828 | -0.406271 |
| C | -7.939714 | -3.342246 | 0.231718  | H | 1.987253  | -5.683673 | -2.163176 |
| H | -8.521761 | -4.268642 | 0.150902  | C | 1.615275  | -3.891262 | -1.132853 |
| H | -8.230473 | -2.689952 | -0.600630 | N | 0.687734  | -3.180603 | -1.770609 |
| H | -8.223715 | -2.839962 | 1.163030  | H | 0.686625  | -2.144443 | -1.706554 |
| C | -6.046934 | -4.407857 | -1.079917 | C | 3.002681  | -2.167711 | -0.181219 |
| H | -6.604271 | -5.350661 | -1.142567 | H | 2.374073  | -1.392238 | -0.621841 |
| H | -4.976472 | -4.637182 | -1.103613 | C | 2.665325  | -2.379203 | 1.307505  |
| H | -6.281736 | -3.825401 | -1.979024 | S | 1.053542  | -3.281380 | 1.435743  |
| C | -4.887569 | 0.864752  | -1.524718 | H | 0.165841  | -1.888598 | 1.166683  |
| H | -4.271841 | 1.713645  | -1.214748 | H | 4.049735  | -1.903508 | -0.332481 |
| C | -4.289256 | 0.332539  | -2.840880 | O | 2.832305  | -3.416155 | -0.896838 |
| H | -4.875044 | -0.505481 | -3.238209 | H | 2.490519  | -1.376513 | 1.713552  |

|                                |           |           |           |   |           |           |           |
|--------------------------------|-----------|-----------|-----------|---|-----------|-----------|-----------|
| C                              | 3.759119  | -3.036611 | 2.128206  | H | 2.700226  | -1.931530 | -0.795943 |
| C                              | 4.583925  | -4.052539 | 1.622475  | C | 0.124058  | 2.371328  | -0.375444 |
| C                              | 3.955956  | -2.618182 | 3.452450  | C | -1.144867 | 2.928252  | -0.279145 |
| C                              | 5.576932  | -4.628141 | 2.418806  | C | -1.362246 | 4.240459  | -0.829799 |
| H                              | 4.450260  | -4.397981 | 0.602492  | C | -0.238521 | 4.978295  | -1.323975 |
| C                              | 4.943710  | -3.194544 | 4.249984  | C | 1.048462  | 4.384504  | -1.296623 |
| H                              | 3.321499  | -1.835580 | 3.861737  | C | 1.254897  | 3.089968  | -0.866245 |
| C                              | 5.760840  | -4.203444 | 3.735096  | H | -3.520984 | 4.280241  | -0.615991 |
| H                              | 6.206747  | -5.412510 | 2.006429  | C | -2.650160 | 4.835501  | -0.943306 |
| H                              | 5.077257  | -2.852977 | 5.273226  | C | -0.433360 | 6.283559  | -1.851817 |
| H                              | 6.532994  | -4.653003 | 4.353717  | H | 1.896570  | 4.964869  | -1.650398 |
| <b>TS4-R E= -3768.22254126</b> |           |           |           | C | -1.690422 | 6.837635  | -1.924682 |
| C                              | -0.309507 | -0.270739 | 3.652596  | C | -2.808897 | 6.096140  | -1.476496 |
| C                              | 0.722008  | -1.209359 | 3.753809  | H | 0.434661  | 6.831273  | -2.211316 |
| C                              | 1.437611  | -1.377418 | 4.949416  | H | -1.828888 | 7.833452  | -2.336773 |
| C                              | 1.081007  | -0.600840 | 6.052988  | H | -3.805205 | 6.522323  | -1.558668 |
| C                              | 0.048003  | 0.335705  | 5.968477  | C | -2.263770 | 2.157811  | 0.339953  |
| C                              | -0.640482 | 0.502667  | 4.764747  | C | -3.040062 | 2.689878  | 1.428119  |
| H                              | -0.830164 | -0.149356 | 2.708433  | C | -2.588337 | 0.897005  | -0.144002 |
| H                              | 1.624935  | -0.728442 | 6.986287  | C | -2.681058 | 3.874301  | 2.130201  |
| H                              | -0.214798 | 0.932491  | 6.837195  | C | -4.209472 | 1.981242  | 1.855491  |
| H                              | -1.439485 | 1.234131  | 4.684928  | C | -3.764294 | 0.187705  | 0.245352  |
| C                              | 2.585032  | -2.360359 | 4.953199  | C | -3.450188 | 4.344728  | 3.172684  |
| H                              | 3.499760  | -1.860352 | 4.600504  | H | -1.779997 | 4.403793  | 1.842553  |
| H                              | 2.794592  | -2.713980 | 5.968333  | C | -4.992249 | 2.504236  | 2.920555  |
| C                              | 2.277393  | -3.549837 | 4.033868  | C | -4.560100 | 0.765967  | 1.213380  |
| H                              | 3.143958  | -4.199334 | 3.890762  | C | -4.625734 | 3.662378  | 3.567197  |
| H                              | 1.474846  | -4.163998 | 4.467943  | H | -3.149390 | 5.247250  | 3.698050  |
| C                              | 1.793860  | -3.106737 | 2.664669  | H | -5.883833 | 1.960302  | 3.223730  |
| N                              | 1.064688  | -1.983539 | 2.612955  | H | -5.476608 | 0.264923  | 1.513670  |
| H                              | 0.614030  | -1.702590 | 1.719560  | H | -5.228498 | 4.048654  | 4.384629  |
| C                              | 2.634881  | -3.007017 | -0.968638 | C | -4.156960 | -1.111895 | -0.394360 |
| C                              | 1.509800  | -3.636733 | -0.276794 | C | -4.600735 | -1.129626 | -1.740639 |
|                                |           |           |           | C | -4.143559 | -2.312407 | 0.354813  |

|   |           |           |           |   |           |           |           |
|---|-----------|-----------|-----------|---|-----------|-----------|-----------|
| C | -5.014141 | -2.340843 | -2.302818 | H | -3.537159 | -5.314491 | -3.126341 |
| C | -4.576676 | -3.495443 | -0.258423 | H | -4.670809 | -4.512201 | -4.222758 |
| C | -5.012086 | -3.538560 | -1.582299 | H | -4.902788 | -6.219446 | -3.813190 |
| H | -5.355803 | -2.345523 | -3.335049 | C | -3.675989 | -2.380934 | 1.809066  |
| H | -4.570968 | -4.418945 | 0.316463  | H | -3.258004 | -1.406862 | 2.076372  |
| C | 2.636742  | 2.501862  | -0.893595 | C | -4.849993 | -2.661173 | 2.768341  |
| C | 3.393247  | 2.427737  | 0.300731  | H | -5.635698 | -1.902709 | 2.677417  |
| C | 3.216419  | 2.100168  | -2.119900 | H | -4.504102 | -2.667302 | 3.809456  |
| C | 4.713875  | 1.972139  | 0.242291  | H | -5.307932 | -3.636254 | 2.562311  |
| C | 4.543139  | 1.647864  | -2.119593 | C | -2.552034 | -3.415152 | 2.008304  |
| C | 5.314137  | 1.580983  | -0.958170 | H | -1.717784 | -3.198280 | 1.336531  |
| H | 5.294711  | 1.937280  | 1.160532  | H | -2.897491 | -4.438633 | 1.819523  |
| H | 4.996859  | 1.350861  | -3.062596 | H | -2.185650 | -3.376123 | 3.041953  |
| O | -1.781412 | 0.325450  | -1.113429 | C | 2.466329  | 2.180160  | -3.450200 |
| O | 0.333177  | 1.089972  | 0.106766  | H | 1.411834  | 2.369745  | -3.230960 |
| P | -0.290855 | -0.223099 | -0.678258 | C | 2.521932  | 0.864844  | -4.248846 |
| O | -0.383192 | -1.298880 | 0.380150  | H | 1.922909  | 0.959473  | -5.162756 |
| C | -4.688899 | 0.133806  | -2.596990 | H | 2.110836  | 0.042695  | -3.658893 |
| H | -4.316318 | 0.975299  | -2.007023 | H | 3.544133  | 0.610404  | -4.554969 |
| C | -6.151475 | 0.459889  | -2.961028 | C | 2.985546  | 3.354331  | -4.305661 |
| H | -6.769526 | 0.570096  | -2.062582 | H | 4.042113  | 3.215698  | -4.566325 |
| H | -6.598327 | -0.329031 | -3.577697 | H | 2.897552  | 4.310352  | -3.777789 |
| H | -6.205465 | 1.397043  | -3.528552 | H | 2.416300  | 3.429877  | -5.240151 |
| C | -3.808010 | 0.041983  | -3.857617 | C | 6.770375  | 1.135494  | -1.014336 |
| H | -2.764894 | -0.149935 | -3.590238 | H | 6.963015  | 0.794222  | -2.041156 |
| H | -3.850652 | 0.983243  | -4.419178 | C | 7.726626  | 2.312192  | -0.735584 |
| H | -4.144660 | -0.758013 | -4.528155 | H | 8.772308  | 1.997543  | -0.840763 |
| C | -5.470138 | -4.848436 | -2.210750 | H | 7.593440  | 2.696045  | 0.283056  |
| H | -5.355606 | -5.629871 | -1.446632 | H | 7.547083  | 3.140613  | -1.429596 |
| C | -6.958976 | -4.805841 | -2.605047 | C | 7.066314  | -0.046235 | -0.072824 |
| H | -7.282921 | -5.775753 | -3.002057 | H | 8.108406  | -0.371628 | -0.179525 |
| H | -7.144013 | -4.050963 | -3.378545 | H | 6.419373  | -0.902517 | -0.291114 |
| H | -7.589683 | -4.561112 | -1.743230 | H | 6.914057  | 0.230631  | 0.977203  |
| C | -4.592424 | -5.246706 | -3.412455 | C | 2.832233  | 2.885864  | 1.646319  |

|                                |           |           |           |   |           |           |           |
|--------------------------------|-----------|-----------|-----------|---|-----------|-----------|-----------|
| H                              | 1.761454  | 3.070025  | 1.524025  | C | -0.399245 | 0.640751  | 4.829393  |
| C                              | 2.978435  | 1.812728  | 2.739871  | H | 0.184956  | 0.426553  | 2.752905  |
| H                              | 4.030202  | 1.617365  | 2.982417  | H | -1.075275 | 3.605746  | 6.353846  |
| H                              | 2.520141  | 0.870773  | 2.423758  | H | -0.987653 | 1.171586  | 6.837793  |
| H                              | 2.481818  | 2.136589  | 3.661977  | H | -0.368540 | -0.426789 | 5.027543  |
| C                              | 3.471857  | 4.217991  | 2.086572  | C | -0.583536 | 4.856595  | 3.928328  |
| H                              | 3.312148  | 5.000080  | 1.335840  | H | -1.581450 | 5.072808  | 3.517539  |
| H                              | 4.553737  | 4.110858  | 2.232000  | H | -0.465602 | 5.492929  | 4.811867  |
| H                              | 3.037604  | 4.561502  | 3.033673  | C | 0.479307  | 5.208139  | 2.879623  |
| O                              | 0.442979  | -0.502498 | -1.965937 | H | 0.349983  | 6.214660  | 2.475686  |
| H                              | 1.413530  | -4.713195 | -0.293170 | H | 1.481814  | 5.160473  | 3.329200  |
| H                              | 0.636117  | -3.034481 | -0.055317 | C | 0.476565  | 4.234611  | 1.714457  |
| O                              | 2.067855  | -3.822963 | 1.667624  | N | 0.190096  | 2.953644  | 1.994651  |
| S                              | 1.565264  | -3.242891 | -2.504419 | H | 0.305037  | 2.224837  | 1.264938  |
| H                              | 0.920420  | -1.991661 | -2.349938 | C | 2.083268  | 3.055861  | -1.344758 |
| C                              | 3.979855  | -3.674871 | -1.054107 | C | 0.798989  | 3.741886  | -1.240746 |
| C                              | 4.291815  | -4.834041 | -0.334095 | C | -2.280155 | -1.482900 | -0.357037 |
| C                              | 4.956977  | -3.103771 | -1.884141 | C | -1.833293 | -2.778407 | -0.130950 |
| C                              | 5.556146  | -5.417404 | -0.453507 | C | -2.606395 | -3.870703 | -0.663037 |
| H                              | 3.565729  | -5.263222 | 0.347101  | C | -3.874653 | -3.591594 | -1.267367 |
| C                              | 6.216908  | -3.685990 | -2.000209 | C | -4.319315 | -2.248482 | -1.361572 |
| H                              | 4.719195  | -2.205007 | -2.447913 | C | -3.542445 | -1.184971 | -0.951982 |
| C                              | 6.519089  | -4.849913 | -1.286806 | H | -1.181457 | -5.451468 | -0.242173 |
| H                              | 5.786157  | -6.316007 | 0.112620  | C | -2.156732 | -5.220909 | -0.654104 |
| H                              | 6.961845  | -3.234127 | -2.649246 | C | -4.658428 | -4.661587 | -1.778056 |
| H                              | 7.500891  | -5.306418 | -1.378062 | H | -5.298643 | -2.053521 | -1.790496 |
|                                |           |           |           | C | -4.202666 | -5.958814 | -1.731572 |
|                                |           |           |           | C | -2.931570 | -6.234372 | -1.174981 |
|                                |           |           |           | H | -5.623845 | -4.429953 | -2.221934 |
|                                |           |           |           | H | -4.807056 | -6.768057 | -2.132190 |
|                                |           |           |           | H | -2.559005 | -7.255187 | -1.162691 |
|                                |           |           |           | C | -0.563029 | -3.022529 | 0.615039  |
|                                |           |           |           | C | -0.518030 | -3.874934 | 1.773499  |
|                                |           |           |           | C | 0.618618  | -2.429126 | 0.190266  |
| <b>TS4-S E= -3768.22149008</b> |           |           |           |   |           |           |           |
| H                              | 0.688631  | 1.548881  | -2.697029 |   |           |           |           |
| C                              | -0.083004 | 1.107876  | 3.553824  |   |           |           |           |
| C                              | -0.123877 | 2.482521  | 3.298522  |   |           |           |           |
| C                              | -0.493616 | 3.395232  | 4.299407  |   |           |           |           |
| C                              | -0.795212 | 2.904580  | 5.570824  |   |           |           |           |
| C                              | -0.748654 | 1.535657  | 5.842705  |   |           |           |           |

|   |           |           |           |   |           |           |           |
|---|-----------|-----------|-----------|---|-----------|-----------|-----------|
| C | -1.685215 | -4.381784 | 2.410160  | C | 3.605610  | -4.933058 | -2.168392 |
| C | 0.755087  | -4.207159 | 2.340345  | H | 3.859215  | -5.376452 | -1.198726 |
| C | 1.899593  | -2.767769 | 0.721187  | H | 4.541677  | -4.770511 | -2.715741 |
| C | -1.595764 | -5.192909 | 3.520568  | H | 3.012531  | -5.663477 | -2.732172 |
| H | -2.659062 | -4.112203 | 2.018110  | C | 2.404718  | -3.031801 | -3.356632 |
| C | 0.813811  | -5.061962 | 3.474467  | H | 1.803934  | -2.127183 | -3.226050 |
| C | 1.935020  | -3.671365 | 1.763511  | H | 1.807194  | -3.760583 | -3.917771 |
| C | -0.334784 | -5.549706 | 4.054311  | H | 3.278852  | -2.780277 | -3.969337 |
| H | -2.503337 | -5.559253 | 3.992925  | C | 6.945843  | -0.749143 | -1.467736 |
| H | 1.789692  | -5.313364 | 3.883458  | H | 7.353711  | -0.040432 | -0.732780 |
| H | 2.896384  | -3.971077 | 2.172825  | C | 7.963022  | -1.898541 | -1.609423 |
| H | -0.277715 | -6.197061 | 4.925183  | H | 8.934551  | -1.517933 | -1.947850 |
| C | 3.167025  | -2.207445 | 0.144339  | H | 7.621444  | -2.640094 | -2.341340 |
| C | 3.597144  | -2.616993 | -1.143433 | H | 8.111142  | -2.415939 | -0.655163 |
| C | 3.966112  | -1.315459 | 0.898001  | C | 6.783387  | 0.008158  | -2.799233 |
| C | 4.806598  | -2.126116 | -1.643703 | H | 6.096609  | 0.855336  | -2.696214 |
| C | 5.172482  | -0.858882 | 0.347620  | H | 6.388545  | -0.646253 | -3.585087 |
| C | 5.614851  | -1.246632 | -0.917580 | H | 7.750795  | 0.393236  | -3.144234 |
| H | 5.132303  | -2.450889 | -2.628787 | C | 3.582131  | -0.833312 | 2.297629  |
| H | 5.795023  | -0.184064 | 0.931706  | H | 2.573371  | -1.194743 | 2.514241  |
| C | -4.046635 | 0.222575  | -1.094194 | C | 4.523326  | -1.417770 | 3.370229  |
| C | -4.579246 | 0.892854  | 0.033122  | H | 4.525348  | -2.513456 | 3.351303  |
| C | -4.054207 | 0.855702  | -2.359245 | H | 4.212394  | -1.096137 | 4.371767  |
| C | -5.104332 | 2.179173  | -0.126446 | H | 5.556749  | -1.083530 | 3.217521  |
| C | -4.597533 | 2.143073  | -2.462188 | C | 3.534826  | 0.703040  | 2.394146  |
| C | -5.124775 | 2.825650  | -1.365451 | H | 2.837073  | 1.108138  | 1.656425  |
| H | -5.516871 | 2.685601  | 0.743012  | H | 4.520096  | 1.155627  | 2.230412  |
| H | -4.611898 | 2.632353  | -3.433196 | H | 3.193491  | 1.007337  | 3.391059  |
| O | 0.579511  | -1.536745 | -0.865222 | C | -3.525106 | 0.174438  | -3.622052 |
| O | -1.512897 | -0.419231 | 0.091287  | H | -2.937989 | -0.694771 | -3.312539 |
| P | -0.092770 | -0.046565 | -0.659147 | C | -2.582313 | 1.075830  | -4.440294 |
| O | 0.682140  | 0.785400  | 0.336167  | H | -2.165001 | 0.508668  | -5.281109 |
| C | 2.816127  | -3.619744 | -1.993414 | H | -1.753814 | 1.424348  | -3.820034 |
| H | 1.894616  | -3.875027 | -1.464006 | H | -3.102385 | 1.945187  | -4.860422 |



|   |           |           |           |   |                                |           |           |
|---|-----------|-----------|-----------|---|--------------------------------|-----------|-----------|
| C | -4.685773 | -0.328318 | -4.505137 | H | 2.602757                       | 5.750693  | -1.835693 |
| H | -5.309243 | 0.507078  | -4.847264 | C | 5.871531                       | 5.095589  | -1.182271 |
| H | -5.334566 | -1.026197 | -3.964995 | H | 6.662450                       | 3.167385  | -0.622388 |
| H | -4.298643 | -0.844201 | -5.392468 | H | 4.788367                       | 6.874205  | -1.744868 |
| C | -5.702952 | 4.226013  | -1.525477 | H | 6.834640                       | 5.596825  | -1.139723 |
| H | -5.603524 | 4.495988  | -2.585866 | O | 0.770003                       | 4.665829  | 0.572228  |
| C | -7.202945 | 4.274801  | -1.177069 | S | 1.475675                       | 2.662662  | -3.095934 |
| H | -7.610675 | 5.277128  | -1.356809 |   |                                |           |           |
| H | -7.374888 | 4.029750  | -0.122202 |   | <b>TS5-R E= -3060.57191219</b> |           |           |
| H | -7.772323 | 3.560556  | -1.781855 | H | 1.881062                       | 1.432159  | -2.455826 |
| C | -4.914660 | 5.268632  | -0.709819 | C | -0.104198                      | -0.392611 | 3.132109  |
| H | -5.311696 | 6.276910  | -0.880464 | C | 1.077384                       | 0.246566  | 3.524531  |
| H | -3.854398 | 5.267105  | -0.986560 | C | 1.256210                       | 0.694077  | 4.844114  |
| H | -4.979384 | 5.062309  | 0.365322  | C | 0.235015                       | 0.468940  | 5.767664  |
| C | -4.643025 | 0.241508  | 1.414349  | C | -0.946972                      | -0.173531 | 5.390206  |
| H | -4.127455 | -0.721585 | 1.361676  | C | -1.115144                      | -0.597633 | 4.070006  |
| C | -3.922314 | 1.077939  | 2.486840  | H | -0.219455                      | -0.714722 | 2.103155  |
| H | -4.405861 | 2.050939  | 2.636784  | H | 0.367392                       | 0.806551  | 6.793313  |
| H | -2.879399 | 1.254263  | 2.207675  | H | -1.731909                      | -0.338928 | 6.122820  |
| H | -3.929823 | 0.554464  | 3.450412  | H | -2.033049                      | -1.091401 | 3.763846  |
| C | -6.100459 | -0.052698 | 1.822306  | C | 2.535909                       | 1.427170  | 5.167325  |
| H | -6.595346 | -0.694912 | 1.084982  | H | 2.417569                       | 2.498416  | 4.943798  |
| H | -6.686990 | 0.870168  | 1.907152  | H | 2.768612                       | 1.354843  | 6.235540  |
| H | -6.133815 | -0.561243 | 2.793792  | C | 3.696588                       | 0.864134  | 4.334863  |
| O | -0.317754 | 0.488897  | -2.052841 | H | 4.611242                       | 1.444368  | 4.465675  |
| H | 2.099173  | 2.121911  | -0.784584 | H | 3.915594                       | -0.164597 | 4.659374  |
| H | -0.086585 | 3.153067  | -1.044558 | C | 3.363835                       | 0.794304  | 2.854669  |
| H | 0.664868  | 4.734644  | -1.641854 | N | 2.096167                       | 0.468681  | 2.565392  |
| C | 3.380017  | 3.804870  | -1.291215 | H | 1.831105                       | 0.310022  | 1.580012  |
| C | 4.537644  | 3.092057  | -0.947369 | C | 3.453855                       | 2.217713  | -1.408101 |
| C | 3.484764  | 5.172422  | -1.577268 | C | 3.801626                       | 0.808079  | -1.265014 |
| C | 5.775197  | 3.733036  | -0.893087 | H | 2.689506                       | 2.602288  | -0.734769 |
| H | 4.466560  | 2.030929  | -0.721258 | H | 3.028608                       | 0.188498  | -0.819567 |
| C | 4.722830  | 5.812556  | -1.523052 | C | -2.319122                      | 1.239167  | -0.625519 |

|   |           |           |           |   |           |           |           |
|---|-----------|-----------|-----------|---|-----------|-----------|-----------|
| C | -3.152862 | 0.144495  | -0.805048 | C | 2.664495  | -4.600393 | -2.174842 |
| C | -4.421604 | 0.344510  | -1.450204 | H | 1.970497  | -3.846399 | -4.074060 |
| C | -4.821510 | 1.678833  | -1.786983 | H | 3.078741  | -5.222253 | -0.149429 |
| C | -3.952538 | 2.760656  | -1.501137 | C | -1.807454 | 3.738979  | -0.696856 |
| C | -2.701493 | 2.576266  | -0.944360 | C | -1.665779 | 4.732448  | -1.679677 |
| H | -4.985069 | -1.744041 | -1.602453 | C | -1.128228 | 3.904843  | 0.522693  |
| C | -5.287582 | -0.724596 | -1.812159 | C | -0.877172 | 5.860173  | -1.451749 |
| C | -6.078357 | 1.893111  | -2.415871 | C | -0.341481 | 5.033328  | 0.750109  |
| H | -4.285979 | 3.768970  | -1.732282 | C | -0.212468 | 6.016177  | -0.234416 |
| C | -6.901080 | 0.837195  | -2.733432 | H | -0.776695 | 6.612445  | -2.229874 |
| C | -6.492130 | -0.484623 | -2.436978 | H | 0.168370  | 5.147278  | 1.703421  |
| H | -6.371070 | 2.913178  | -2.653532 | O | -0.731640 | -0.894521 | -1.698230 |
| H | -7.856107 | 1.013021  | -3.220882 | O | -1.061318 | 1.034541  | -0.080460 |
| H | -7.131712 | -1.319803 | -2.709636 | P | 0.115432  | 0.329786  | -0.992818 |
| C | -2.689051 | -1.208786 | -0.374579 | O | 1.148364  | -0.175809 | -0.022875 |
| C | -3.419693 | -2.001091 | 0.576807  | O | 0.535433  | 1.234109  | -2.134519 |
| C | -1.488500 | -1.703143 | -0.864678 | S | 4.550281  | 1.051317  | 1.688475  |
| C | -4.578690 | -1.528119 | 1.253555  | O | 2.926366  | 1.632059  | -2.620237 |
| C | -2.937385 | -3.311580 | 0.901144  | C | 5.025706  | 0.169925  | -1.721290 |
| C | -0.992532 | -3.006015 | -0.558275 | C | 6.143586  | 0.894377  | -2.174662 |
| C | -5.241474 | -2.318688 | 2.167623  | C | 5.083232  | -1.236511 | -1.691716 |
| H | -4.935655 | -0.525307 | 1.049817  | C | 7.290488  | 0.225288  | -2.588811 |
| C | -3.655774 | -4.108402 | 1.834185  | H | 6.117105  | 1.979020  | -2.201914 |
| C | -1.743266 | -3.784116 | 0.301954  | C | 6.233291  | -1.901907 | -2.105496 |
| C | -4.785924 | -3.627696 | 2.454518  | H | 4.221766  | -1.798140 | -1.341279 |
| H | -6.120995 | -1.931560 | 2.675028  | C | 7.337094  | -1.172380 | -2.554714 |
| H | -3.283900 | -5.105502 | 2.058131  | H | 8.150562  | 0.790321  | -2.936090 |
| H | -1.408159 | -4.791289 | 0.535690  | H | 6.269164  | -2.986958 | -2.078422 |
| H | -5.322489 | -4.243763 | 3.170866  | H | 8.235790  | -1.691178 | -2.877195 |
| C | 0.282069  | -3.520966 | -1.126257 | H | 4.236277  | 2.943285  | -1.621135 |
| C | 0.582433  | -3.404203 | -2.494375 | H | 3.579753  | -5.022293 | -2.582491 |
| C | 1.200982  | -4.181992 | -0.294774 | H | -0.112301 | -2.895333 | -3.153389 |
| C | 1.760541  | -3.940545 | -3.011860 | H | 0.996303  | -4.255645 | 0.769564  |
| C | 2.380880  | -4.717289 | -0.812472 | H | -1.223402 | 3.150295  | 1.295779  |

|                                |           |           |           |   |           |           |           |
|--------------------------------|-----------|-----------|-----------|---|-----------|-----------|-----------|
| H                              | 0.402831  | 6.893960  | -0.054655 | C | 5.566420  | 0.419610  | 1.298607  |
| H                              | -2.161223 | 4.604913  | -2.638046 | C | 6.283655  | 3.040598  | 0.622422  |
| <b>TS5-S E= -3060.57044857</b> |           |           |           | H | 4.331404  | 4.430957  | -0.592371 |
| H                              | -1.688921 | 2.216279  | 1.948529  | C | 7.186394  | 2.226911  | 1.267127  |
| C                              | -0.461631 | -2.660709 | -1.939396 | C | 6.815525  | 0.906801  | 1.616757  |
| C                              | -1.855933 | -2.764028 | -2.000665 | H | 6.546947  | 4.063488  | 0.363496  |
| C                              | -2.478660 | -3.649756 | -2.896008 | H | 8.176167  | 2.597237  | 1.519811  |
| C                              | -1.675026 | -4.450743 | -3.707708 | H | 7.520168  | 0.272650  | 2.148062  |
| C                              | -0.281722 | -4.368368 | -3.645554 | C | 2.911162  | -0.667381 | 0.444659  |
| C                              | 0.321113  | -3.467893 | -2.764461 | C | 3.633100  | -1.730177 | -0.203059 |
| H                              | -0.009145 | -1.949583 | -1.256727 | C | 1.806854  | -0.994839 | 1.216567  |
| H                              | -2.149160 | -5.143396 | -4.399673 | C | 4.677762  | -1.502452 | -1.141487 |
| H                              | 0.328092  | -5.001024 | -4.284312 | C | 3.258086  | -3.086418 | 0.070673  |
| H                              | 1.403235  | -3.393129 | -2.710533 | C | 1.418084  | -2.337610 | 1.506265  |
| C                              | -3.987329 | -3.648913 | -2.950656 | C | 5.334729  | -2.552768 | -1.745081 |
| H                              | -4.332790 | -2.880301 | -3.658546 | H | 4.949334  | -0.483881 | -1.391903 |
| H                              | -4.365516 | -4.607991 | -3.321586 | C | 3.968845  | -4.147742 | -0.554791 |
| C                              | -4.569978 | -3.353906 | -1.561829 | C | 2.172296  | -3.348962 | 0.942550  |
| H                              | -5.654250 | -3.237363 | -1.591012 | C | 4.988451  | -3.891112 | -1.442419 |
| H                              | -4.350929 | -4.194744 | -0.885984 | H | 6.124014  | -2.350424 | -2.464036 |
| C                              | -3.956154 | -2.116691 | -0.931118 | H | 3.679693  | -5.170543 | -0.324700 |
| N                              | -2.649147 | -1.937936 | -1.166220 | H | 1.922718  | -4.383327 | 1.163291  |
| H                              | -2.151228 | -1.185987 | -0.669746 | H | 5.520340  | -4.710162 | -1.918764 |
| C                              | -3.331727 | 0.999259  | 2.299327  | C | 0.245992  | -2.657929 | 2.364199  |
| C                              | -3.700397 | 1.474395  | 0.971010  | C | 0.016684  | -2.001005 | 3.585857  |
| H                              | -4.092818 | 0.945291  | 3.075012  | C | -0.644705 | -3.672624 | 1.974766  |
| C                              | 2.376770  | 1.683288  | -0.220585 | C | -1.065969 | -2.354986 | 4.390704  |
| C                              | 3.296184  | 0.765293  | 0.272283  | C | -1.728211 | -4.023960 | 2.779899  |
| C                              | 4.614708  | 1.226789  | 0.615174  | C | -1.943196 | -3.366943 | 3.992336  |
| C                              | 4.982309  | 2.572792  | 0.293521  | H | -1.219634 | -1.841947 | 5.336719  |
| C                              | 4.034647  | 3.418020  | -0.333456 | H | -2.409255 | -4.806169 | 2.454800  |
| C                              | 2.735353  | 3.018716  | -0.579847 | C | 1.796697  | 3.955613  | -1.260165 |
| H                              | 5.294691  | -0.589534 | 1.586041  | C | 2.202555  | 4.578389  | -2.452545 |
|                                |           |           |           | C | 0.538624  | 4.279536  | -0.726953 |

|                            |           |           |           |   |           |           |           |
|----------------------------|-----------|-----------|-----------|---|-----------|-----------|-----------|
| C                          | 1.376921  | 5.499600  | -3.097521 | C | -2.458725 | 0.856251  | 0.168964  |
| C                          | -0.282708 | 5.204443  | -1.372405 | C | -3.746175 | 1.295279  | 0.641267  |
| C                          | 0.129397  | 5.816812  | -2.558146 | C | -4.804474 | 0.336701  | 0.752402  |
| H                          | 1.707767  | 5.964697  | -4.022698 | C | -4.551543 | -1.022443 | 0.436275  |
| H                          | -1.249180 | 5.452008  | -0.940096 | C | -3.294851 | -1.479285 | 0.096359  |
| O                          | 1.051198  | 0.035441  | 1.750845  | H | -3.215748 | 3.367111  | 1.002989  |
| O                          | 1.079585  | 1.269511  | -0.481742 | C | -4.013657 | 2.634810  | 1.038646  |
| P                          | 0.052100  | 0.860383  | 0.734147  | C | -6.087532 | 0.759544  | 1.194307  |
| O                          | -1.015852 | -0.003509 | 0.132025  | H | -5.375049 | -1.729027 | 0.484479  |
| O                          | -0.365925 | 2.083053  | 1.535944  | C | -6.317723 | 2.068435  | 1.549692  |
| S                          | -4.882484 | -1.092655 | 0.030674  | C | -5.263090 | 3.009155  | 1.482925  |
| O                          | -2.720398 | 2.309476  | 2.250291  | H | -6.881908 | 0.020034  | 1.261086  |
| H                          | -2.625612 | 0.171442  | 2.331443  | H | -7.300238 | 2.378710  | 1.894410  |
| H                          | -2.967154 | 1.260935  | 0.202159  | H | -5.438028 | 4.036614  | 1.790188  |
| C                          | -4.871940 | 2.265341  | 0.624504  | C | -1.360740 | 1.826000  | -0.118528 |
| C                          | -5.924943 | 2.500329  | 1.527189  | C | -1.547924 | 2.925938  | -1.028963 |
| C                          | -4.944446 | 2.813045  | -0.669719 | C | -0.116487 | 1.681841  | 0.476784  |
| C                          | -7.021127 | 3.264938  | 1.141192  | C | -2.705461 | 3.072174  | -1.843077 |
| H                          | -5.886774 | 2.087380  | 2.530020  | C | -0.509236 | 3.904637  | -1.155267 |
| C                          | -6.043137 | 3.575448  | -1.054027 | C | 0.930541  | 2.641906  | 0.372963  |
| H                          | -4.134536 | 2.628823  | -1.370153 | C | -2.841859 | 4.141588  | -2.701009 |
| C                          | -7.082561 | 3.802984  | -0.148255 | H | -3.484874 | 2.320987  | -1.795403 |
| H                          | -7.830420 | 3.441535  | 1.843605  | C | -0.689973 | 5.006878  | -2.034574 |
| H                          | -6.090306 | 3.991386  | -2.056092 | C | 0.691022  | 3.747852  | -0.416593 |
| H                          | -7.941548 | 4.397864  | -0.446250 | C | -1.832747 | 5.129243  | -2.790538 |
| H                          | -2.787658 | -3.638561 | 4.620219  | H | -3.731897 | 4.223963  | -3.318876 |
| H                          | 0.692520  | -1.216113 | 3.906704  | H | 0.104224  | 5.745962  | -2.107890 |
| H                          | -0.498124 | -4.169614 | 1.019928  | H | 1.459007  | 4.512335  | -0.500157 |
| H                          | 0.212975  | 3.818128  | 0.198947  | H | -1.956873 | 5.971905  | -3.465040 |
| H                          | -0.515765 | 6.535359  | -3.057344 | C | 2.233222  | 2.477516  | 1.099037  |
| H                          | 3.167161  | 4.322659  | -2.882991 | C | 2.287697  | 2.644548  | 2.505016  |
|                            |           |           |           | C | 3.417120  | 2.197947  | 0.376539  |
|                            |           |           |           | C | 3.520861  | 2.530142  | 3.152628  |
|                            |           |           |           | C | 4.625574  | 2.098184  | 1.078503  |
| <b>V E= -3060.43164707</b> |           |           |           |   |           |           |           |
| C                          | -2.259745 | -0.505361 | -0.004551 |   |           |           |           |

|   |           |           |           |   |           |           |           |
|---|-----------|-----------|-----------|---|-----------|-----------|-----------|
| C | 4.705206  | 2.257986  | 2.461438  | H | 7.040350  | 0.831724  | 4.624645  |
| H | 3.556466  | 2.663209  | 4.231048  | C | 3.439415  | 1.998503  | -1.139742 |
| H | 5.538193  | 1.883408  | 0.526906  | H | 2.407874  | 2.023478  | -1.501372 |
| C | -3.057302 | -2.933146 | -0.196625 | C | 4.201530  | 3.137817  | -1.845559 |
| C | -2.875894 | -3.360625 | -1.535227 | H | 3.765600  | 4.116899  | -1.615579 |
| C | -3.072928 | -3.885710 | 0.851245  | H | 4.175134  | 3.001763  | -2.933597 |
| C | -2.719908 | -4.725257 | -1.796669 | H | 5.253701  | 3.164834  | -1.537545 |
| C | -2.922438 | -5.240529 | 0.528062  | C | 4.014503  | 0.624519  | -1.534456 |
| C | -2.744229 | -5.685723 | -0.781973 | H | 3.438405  | -0.176404 | -1.062541 |
| H | -2.583961 | -5.045951 | -2.826632 | H | 5.065558  | 0.522268  | -1.238866 |
| H | -2.939961 | -5.976452 | 1.328135  | H | 3.963260  | 0.495429  | -2.622955 |
| O | 0.113440  | 0.582126  | 1.304190  | C | -3.263008 | -3.498803 | 2.319404  |
| O | -0.996542 | -0.959095 | -0.384498 | H | -3.082978 | -2.423420 | 2.408907  |
| P | 0.240158  | -0.902163 | 0.667605  | C | -2.266002 | -4.202347 | 3.261165  |
| O | 1.501174  | -1.242854 | -0.044823 | H | -2.338776 | -3.770037 | 4.266104  |
| C | 1.054094  | 2.985996  | 3.340979  | H | -1.233784 | -4.095157 | 2.919103  |
| H | 0.183289  | 2.996453  | 2.679495  | H | -2.481044 | -5.273841 | 3.354935  |
| C | 1.166633  | 4.398303  | 3.950005  | C | -4.705916 | -3.779190 | 2.789076  |
| H | 1.316081  | 5.155364  | 3.171788  | H | -4.939102 | -4.848392 | 2.712935  |
| H | 2.008678  | 4.468178  | 4.648850  | H | -5.445221 | -3.236035 | 2.191501  |
| H | 0.253328  | 4.652278  | 4.501833  | H | -4.833988 | -3.481072 | 3.836919  |
| C | 0.780889  | 1.931323  | 4.430475  | C | -2.577561 | -7.169694 | -1.082829 |
| H | 0.661840  | 0.936164  | 3.991692  | H | -2.661190 | -7.703182 | -0.125933 |
| H | -0.139014 | 2.177170  | 4.974985  | C | -3.690718 | -7.701652 | -2.005370 |
| H | 1.595693  | 1.887384  | 5.162982  | H | -3.584020 | -8.782586 | -2.157743 |
| C | 6.040049  | 2.134958  | 3.184973  | H | -3.654998 | -7.222131 | -2.990861 |
| H | 6.804891  | 1.944123  | 2.419467  | H | -4.681866 | -7.512948 | -1.578577 |
| C | 6.427485  | 3.439638  | 3.906863  | C | -1.185054 | -7.482546 | -1.663363 |
| H | 7.416198  | 3.345385  | 4.372203  | H | -1.059771 | -8.561947 | -1.812841 |
| H | 5.709770  | 3.685269  | 4.698596  | H | -0.391232 | -7.135182 | -0.991950 |
| H | 6.456835  | 4.284294  | 3.209666  | H | -1.037297 | -6.992033 | -2.632764 |
| C | 6.053612  | 0.940464  | 4.158089  | C | -2.880934 | -2.389732 | -2.716070 |
| H | 5.814614  | 0.005605  | 3.639556  | H | -2.992140 | -1.374623 | -2.325134 |
| H | 5.318076  | 1.073632  | 4.960302  | C | -1.556683 | -2.428342 | -3.502806 |

|                                     |           |           |           |   |           |           |           |
|-------------------------------------|-----------|-----------|-----------|---|-----------|-----------|-----------|
| H                                   | -1.389501 | -3.409278 | -3.963696 | C | 1.519497  | 0.583338  | 5.726426  |
| H                                   | -0.706811 | -2.208928 | -2.849563 | C | 0.529521  | 1.562124  | 5.607333  |
| H                                   | -1.570691 | -1.683234 | -4.307605 | C | -0.336992 | 1.550985  | 4.512487  |
| C                                   | -4.086313 | -2.643107 | -3.643841 | H | -0.881807 | 0.533430  | 2.677450  |
| H                                   | -5.032148 | -2.567995 | -3.095388 | H | 2.201846  | 0.598735  | 6.572854  |
| H                                   | -4.042198 | -3.640710 | -4.096765 | H | 0.440571  | 2.334211  | 6.366044  |
| H                                   | -4.105444 | -1.908047 | -4.457769 | H | -1.098994 | 2.317012  | 4.405407  |
| O                                   | -0.113999 | -1.771975 | 1.928025  | C | 2.747237  | -1.459689 | 4.788598  |
| H                                   | 0.460066  | -2.609775 | 2.011982  | H | 3.614104  | -1.096140 | 4.217387  |
| C                                   | 4.098992  | -3.648367 | -1.534340 | H | 3.097009  | -1.639200 | 5.809902  |
| C                                   | 3.469765  | -4.461512 | -0.586611 | C | 2.250815  | -2.773170 | 4.170948  |
| C                                   | 3.752131  | -5.836378 | -0.514545 | H | 3.059498  | -3.487246 | 3.999011  |
| C                                   | 4.691712  | -6.371402 | -1.396637 | H | 1.523461  | -3.258834 | 4.838483  |
| C                                   | 5.329971  | -5.568316 | -2.344659 | C | 1.543080  | -2.535799 | 2.862947  |
| C                                   | 5.025868  | -4.207392 | -2.413374 | N | 0.865214  | -1.432357 | 2.673862  |
| H                                   | 3.861691  | -2.589100 | -1.575645 | H | 0.293724  | -1.233516 | 1.779827  |
| H                                   | 4.919539  | -7.433701 | -1.342775 | C | 1.989894  | -3.432161 | -0.429478 |
| H                                   | 6.057636  | -6.002980 | -3.023836 | C | 0.972587  | -3.616264 | 0.697327  |
| H                                   | 5.514420  | -3.573619 | -3.148075 | H | 2.298413  | -2.384124 | -0.471928 |
| C                                   | 2.983081  | -6.664628 | 0.488824  | C | 0.448015  | 2.439978  | -0.639308 |
| H                                   | 2.031704  | -6.991214 | 0.041076  | C | -0.691389 | 3.233776  | -0.593014 |
| H                                   | 3.534071  | -7.575614 | 0.746142  | C | -0.699738 | 4.471206  | -1.327747 |
| C                                   | 2.685457  | -5.848060 | 1.754323  | C | 0.507731  | 4.907579  | -1.962400 |
| H                                   | 2.000695  | -6.364409 | 2.430891  | C | 1.666328  | 4.093928  | -1.883580 |
| H                                   | 3.616433  | -5.662195 | 2.309504  | C | 1.659385  | 2.860298  | -1.266521 |
| C                                   | 2.084734  | -4.492474 | 1.431764  | H | -2.798888 | 4.945194  | -1.051915 |
| N                                   | 2.521883  | -3.898443 | 0.297438  | C | -1.863189 | 5.275408  | -1.487268 |
| H                                   | 2.192830  | -2.940040 | 0.114155  | C | 0.521456  | 6.138007  | -2.673482 |
| O                                   | 1.264329  | -3.957806 | 2.199356  | H | 2.585046  | 4.451665  | -2.340900 |
|                                     |           |           |           | C | -0.616729 | 6.902315  | -2.788072 |
|                                     |           |           |           | C | -1.822298 | 6.455390  | -2.197672 |
| <b>(R)-5-CP-R E= -3994.46576769</b> |           |           |           | H | 1.451147  | 6.456402  | -3.139310 |
| C                                   | -0.228086 | 0.555103  | 3.542184  | H | -0.597037 | 7.837664  | -3.340650 |
| C                                   | 0.760104  | -0.421854 | 3.682523  | H | -2.727886 | 7.045421  | -2.310747 |
| C                                   | 1.653837  | -0.417258 | 4.763417  |   |           |           |           |

|   |           |           |           |   |           |           |           |
|---|-----------|-----------|-----------|---|-----------|-----------|-----------|
| C | -1.890620 | 2.782664  | 0.173293  | O | -0.705921 | -0.894016 | 0.676118  |
| C | -2.481701 | 3.594491  | 1.203300  | C | -4.843767 | 0.917468  | -2.335213 |
| C | -2.467848 | 1.550661  | -0.108365 | H | -4.271912 | 1.733670  | -1.886156 |
| C | -1.868854 | 4.776155  | 1.706473  | C | -6.236661 | 1.485998  | -2.673917 |
| C | -3.724456 | 3.180232  | 1.783878  | H | -6.753753 | 1.834291  | -1.772429 |
| C | -3.724937 | 1.137822  | 0.428880  | H | -6.873476 | 0.733407  | -3.153997 |
| C | -2.463548 | 5.517228  | 2.704939  | H | -6.145588 | 2.333608  | -3.364031 |
| H | -0.912974 | 5.086541  | 1.300341  | C | -4.091231 | 0.487848  | -3.609100 |
| C | -4.321140 | 3.977600  | 2.798314  | H | -3.087588 | 0.127655  | -3.365965 |
| C | -4.332765 | 1.978082  | 1.339608  | H | -3.994066 | 1.338186  | -4.295086 |
| C | -3.708317 | 5.123554  | 3.251682  | H | -4.622428 | -0.308901 | -4.143590 |
| H | -1.970837 | 6.411738  | 3.076660  | C | -4.001051 | -1.191137 | 2.314376  |
| H | -5.270976 | 3.655380  | 3.218815  | H | -3.380280 | -0.297495 | 2.420755  |
| H | -5.302650 | 1.704822  | 1.746991  | C | -5.127477 | -1.102280 | 3.362859  |
| H | -4.171553 | 5.721429  | 4.031879  | H | -5.750783 | -0.214046 | 3.210879  |
| C | -4.399877 | -0.128311 | -0.011044 | H | -4.708702 | -1.053023 | 4.375781  |
| C | -4.943318 | -0.218204 | -1.316447 | H | -5.785311 | -1.978404 | 3.315359  |
| C | -4.557124 | -1.210067 | 0.889902  | C | -3.090308 | -2.401745 | 2.594657  |
| C | -5.629174 | -1.377735 | -1.687548 | H | -2.286186 | -2.446898 | 1.855675  |
| C | -5.258743 | -2.345161 | 0.471030  | H | -3.645222 | -3.347034 | 2.566876  |
| C | -5.804672 | -2.455274 | -0.812171 | H | -2.644486 | -2.312841 | 3.593990  |
| H | -6.025000 | -1.454076 | -2.696162 | C | 2.459637  | 1.177048  | -3.606373 |
| H | -5.407323 | -3.161530 | 1.172189  | H | 1.440790  | 1.482254  | -3.350690 |
| C | 2.913772  | 2.035004  | -1.218539 | C | 2.361323  | -0.239624 | -4.197914 |
| C | 3.745682  | 2.104334  | -0.076808 | H | 1.656600  | -0.237078 | -5.037686 |
| C | 3.300034  | 1.247864  | -2.330417 | H | 1.993692  | -0.949210 | -3.454571 |
| C | 4.947732  | 1.391041  | -0.066145 | H | 3.323695  | -0.595637 | -4.585670 |
| C | 4.508903  | 0.546014  | -2.267865 | C | 2.999559  | 2.159416  | -4.667695 |
| C | 5.350961  | 0.601755  | -1.149654 | H | 4.025398  | 1.897579  | -4.956130 |
| H | 5.607042  | 1.479706  | 0.792926  | H | 3.008790  | 3.191985  | -4.303357 |
| H | 4.795458  | -0.081571 | -3.105454 | H | 2.377619  | 2.125831  | -5.570433 |
| O | -1.844608 | 0.712029  | -1.012233 | C | 3.399532  | 2.979119  | 1.127495  |
| O | 0.445361  | 1.226282  | 0.023324  | H | 2.378700  | 3.348376  | 0.994641  |
| P | -0.447397 | -0.047723 | -0.565627 | C | 3.419558  | 2.187864  | 2.447326  |

|   |           |           |           |                                      |           |           |           |
|---|-----------|-----------|-----------|--------------------------------------|-----------|-----------|-----------|
| H | 4.427321  | 1.831240  | 2.694108  | H                                    | -8.515065 | -6.867864 | -2.324014 |
| H | 2.753494  | 1.321663  | 2.387358  | C                                    | 6.635518  | -0.145538 | -1.115407 |
| H | 3.080351  | 2.818078  | 3.277899  | C                                    | 7.424624  | -0.286162 | -2.270727 |
| C | 4.323024  | 4.210953  | 1.204839  | C                                    | 7.102596  | -0.730695 | 0.075117  |
| H | 4.257979  | 4.811901  | 0.291095  | C                                    | 8.630149  | -0.985866 | -2.238226 |
| H | 5.371064  | 3.915332  | 1.335315  | H                                    | 7.099075  | 0.178417  | -3.196893 |
| H | 4.045443  | 4.849693  | 2.052478  | C                                    | 8.310717  | -1.428179 | 0.110414  |
| O | 0.152121  | -0.651170 | -1.790297 | H                                    | 6.501525  | -0.652854 | 0.976961  |
| H | 0.566040  | -4.627207 | 0.704289  | C                                    | 9.080499  | -1.560465 | -1.047544 |
| H | 0.166219  | -2.886299 | 0.627052  | H                                    | 9.224089  | -1.074654 | -3.144168 |
| O | 1.646186  | -3.521555 | 2.018223  | H                                    | 8.648813  | -1.871852 | 1.043671  |
| S | 1.085816  | -3.781185 | -2.016892 | H                                    | 10.021822 | -2.102780 | -1.021841 |
| H | 0.478610  | -2.562068 | -2.070237 |                                      |           |           |           |
| C | 3.215779  | -4.313474 | -0.307771 | <b>(R)-5-TS4-R E= -3994.44419331</b> |           |           |           |
| C | 3.111448  | -5.703856 | -0.156259 | C                                    | -0.298207 | 0.371251  | 3.722482  |
| C | 4.490682  | -3.736409 | -0.357016 | C                                    | 0.428138  | -0.802947 | 3.944402  |
| C | 4.255540  | -6.494774 | -0.051837 | C                                    | 1.069362  | -1.040024 | 5.170234  |
| H | 2.132690  | -6.176818 | -0.133045 | C                                    | 0.950283  | -0.083162 | 6.179401  |
| C | 5.637553  | -4.525829 | -0.253368 | C                                    | 0.223972  | 1.092152  | 5.973326  |
| H | 4.589604  | -2.661845 | -0.490422 | C                                    | -0.394429 | 1.318509  | 4.741468  |
| C | 5.522655  | -5.908030 | -0.097949 | H                                    | -0.766863 | 0.535609  | 2.757704  |
| H | 4.156864  | -7.571348 | 0.060699  | H                                    | 1.438470  | -0.260800 | 7.135110  |
| H | 6.615651  | -4.054782 | -0.298899 | H                                    | 0.143511  | 1.826185  | 6.769963  |
| H | 6.413195  | -6.526032 | -0.018916 | H                                    | -0.955957 | 2.231807  | 4.566921  |
| C | -6.549711 | -3.670994 | -1.229236 | C                                    | 1.890122  | -2.301395 | 5.306495  |
| C | -7.697399 | -3.574270 | -2.035043 | H                                    | 2.910070  | -2.120359 | 4.934773  |
| C | -6.129300 | -4.951099 | -0.828860 | H                                    | 1.988906  | -2.592207 | 6.357778  |
| C | -8.398773 | -4.714258 | -2.426227 | C                                    | 1.258223  | -3.444753 | 4.501023  |
| H | -8.054597 | -2.593437 | -2.336406 | H                                    | 1.903935  | -4.324278 | 4.449773  |
| C | -6.830670 | -6.091758 | -1.218393 | H                                    | 0.313343  | -3.757230 | 4.969127  |
| H | -5.228591 | -5.051544 | -0.229694 | C                                    | 0.923707  | -3.027497 | 3.080024  |
| C | -7.969078 | -5.979041 | -2.019192 | N                                    | 0.538944  | -1.755227 | 2.896767  |
| H | -9.287658 | -4.613193 | -3.043780 | H                                    | 0.175309  | -1.459384 | 1.970074  |
| H | -6.480677 | -7.071724 | -0.903868 | C                                    | 1.927716  | -3.297500 | -0.415563 |



|   |           |           |           |   |           |           |           |
|---|-----------|-----------|-----------|---|-----------|-----------|-----------|
| C | 0.644254  | -3.688184 | 0.164699  | C | -4.548911 | -1.166635 | 0.588939  |
| H | 2.152119  | -2.238276 | -0.287652 | C | -5.535474 | -1.084587 | -2.028323 |
| C | 0.587353  | 2.459380  | -0.454373 | C | -5.258952 | -2.243884 | 0.048948  |
| C | -0.530165 | 3.278999  | -0.359236 | C | -5.761866 | -2.229693 | -1.256424 |
| C | -0.485072 | 4.578853  | -0.975992 | H | -5.896889 | -1.064992 | -3.052504 |
| C | 0.750643  | 5.035150  | -1.538121 | H | -5.448127 | -3.114308 | 0.670506  |
| C | 1.880558  | 4.179677  | -1.516878 | C | 3.041534  | 2.018599  | -1.073219 |
| C | 1.822412  | 2.893324  | -1.021456 | C | 3.819200  | 1.821282  | 0.092541  |
| H | -2.577770 | 5.088639  | -0.711653 | C | 3.464769  | 1.464964  | -2.306106 |
| C | -1.621061 | 5.429015  | -1.089549 | C | 5.009657  | 1.094535  | 0.001247  |
| C | 0.818525  | 6.325395  | -2.130364 | C | 4.663756  | 0.744533  | -2.344897 |
| H | 2.816858  | 4.544219  | -1.931364 | C | 5.459848  | 0.552669  | -1.209071 |
| C | -0.294014 | 7.131427  | -2.200530 | H | 5.628640  | 0.983520  | 0.887132  |
| C | -1.527576 | 6.667925  | -1.685479 | H | 4.981854  | 0.306150  | -3.286173 |
| H | 1.769136  | 6.656800  | -2.541649 | O | -1.723022 | 0.831291  | -1.034273 |
| H | -0.232894 | 8.113346  | -2.661706 | O | 0.541414  | 1.193145  | 0.101883  |
| H | -2.413042 | 7.292789  | -1.765875 | P | -0.378341 | -0.004941 | -0.575916 |
| C | -1.765085 | 2.794614  | 0.324862  | O | -0.678582 | -0.949814 | 0.564753  |
| C | -2.374463 | 3.529092  | 1.401207  | C | -4.676762 | 1.238798  | -2.445618 |
| C | -2.364094 | 1.610575  | -0.085856 | H | -4.108862 | 1.999542  | -1.903720 |
| C | -1.747134 | 4.637633  | 2.035837  | C | -6.041889 | 1.866819  | -2.791603 |
| C | -3.652637 | 3.106722  | 1.891035  | H | -6.592408 | 2.145512  | -1.885837 |
| C | -3.652613 | 1.190810  | 0.362453  | H | -6.670527 | 1.174985  | -3.364865 |
| C | -2.361173 | 5.303530  | 3.074910  | H | -5.903618 | 2.770095  | -3.398199 |
| H | -0.764752 | 4.950623  | 1.700899  | C | -3.879637 | 0.901210  | -3.720160 |
| C | -4.268826 | 3.828874  | 2.948868  | H | -2.895060 | 0.496987  | -3.468184 |
| C | -4.275822 | 1.969117  | 1.316645  | H | -3.735364 | 1.803773  | -4.326568 |
| C | -3.640593 | 4.905887  | 3.531378  | H | -4.405005 | 0.165895  | -4.341507 |
| H | -1.856931 | 6.141318  | 3.549148  | C | -4.042975 | -1.281221 | 2.027445  |
| H | -5.244754 | 3.501805  | 3.299808  | H | -3.379456 | -0.433957 | 2.219678  |
| H | -5.269736 | 1.693007  | 1.658565  | C | -5.202153 | -1.209673 | 3.041531  |
| H | -4.117629 | 5.445107  | 4.345214  | H | -5.774215 | -0.281206 | 2.937103  |
| C | -4.340052 | -0.014841 | -0.208973 | H | -4.818825 | -1.257271 | 4.068252  |
| C | -4.840247 | 0.022342  | -1.534018 | H | -5.900738 | -2.044239 | 2.905087  |

|   |           |           |           |                                     |           |           |           |
|---|-----------|-----------|-----------|-------------------------------------|-----------|-----------|-----------|
| C | -3.208300 | -2.556150 | 2.251186  | H                                   | 2.189117  | -5.846563 | 0.662834  |
| H | -2.381584 | -2.598549 | 1.537808  | C                                   | 5.526353  | -4.431304 | -0.712103 |
| H | -3.810323 | -3.466405 | 2.145022  | H                                   | 4.406055  | -2.662015 | -1.204523 |
| H | -2.790502 | -2.556204 | 3.265747  | C                                   | 5.481156  | -5.717263 | -0.167264 |
| C | 2.676978  | 1.644659  | -3.605115 | H                                   | 4.233040  | -7.216218 | 0.752947  |
| H | 1.706682  | 2.080905  | -3.352512 | H                                   | 6.462789  | -4.020857 | -1.077832 |
| C | 2.390315  | 0.309310  | -4.316099 | H                                   | 6.384183  | -6.319495 | -0.114413 |
| H | 1.780291  | 0.488846  | -5.209737 | C                                   | -6.512604 | -3.389584 | -1.802616 |
| H | 1.836065  | -0.361714 | -3.656307 | C                                   | -7.624880 | -3.201741 | -2.641422 |
| H | 3.309966  | -0.190222 | -4.643759 | C                                   | -6.132700 | -4.707453 | -1.494512 |
| C | 3.396129  | 2.623981  | -4.555557 | C                                   | -8.330678 | -4.290088 | -3.153174 |
| H | 4.379150  | 2.237504  | -4.852047 | H                                   | -7.952009 | -2.191923 | -2.873119 |
| H | 3.552428  | 3.602523  | -4.087849 | C                                   | -6.838552 | -5.796578 | -2.004522 |
| H | 2.806741  | 2.774940  | -5.467980 | H                                   | -5.259947 | -4.876641 | -0.869915 |
| C | 3.435376  | 2.429801  | 1.440671  | C                                   | -7.941341 | -5.593296 | -2.836741 |
| H | 2.440732  | 2.872756  | 1.342603  | H                                   | -9.192167 | -4.119113 | -3.793729 |
| C | 3.345839  | 1.368702  | 2.552291  | H                                   | -6.520316 | -6.806563 | -1.758706 |
| H | 4.321446  | 0.911962  | 2.759046  | H                                   | -8.491266 | -6.441685 | -3.235268 |
| H | 2.647579  | 0.573613  | 2.274203  | C                                   | 6.748560  | -0.183948 | -1.288598 |
| H | 2.987549  | 1.820668  | 3.484465  | C                                   | 7.579170  | -0.067295 | -2.417395 |
| C | 4.399630  | 3.567061  | 1.832765  | C                                   | 7.180319  | -1.010275 | -0.235964 |
| H | 4.418503  | 4.351094  | 1.067514  | C                                   | 8.791559  | -0.751683 | -2.493151 |
| H | 5.424461  | 3.197053  | 1.957179  | H                                   | 7.280993  | 0.587029  | -3.231573 |
| H | 4.090373  | 4.023802  | 2.780860  | C                                   | 8.395426  | -1.692441 | -0.308696 |
| O | 0.244285  | -0.531261 | -1.843179 | H                                   | 6.546288  | -1.136652 | 0.637003  |
| H | 0.356192  | -4.728803 | 0.184174  | C                                   | 9.206890  | -1.567799 | -1.438614 |
| H | -0.120145 | -2.928341 | 0.280193  | H                                   | 9.418234  | -0.638451 | -3.374015 |
| O | 0.988112  | -3.886264 | 2.165470  | H                                   | 8.705204  | -2.327015 | 0.517904  |
| S | 0.991876  | -3.456134 | -2.052099 | H                                   | 10.153543 | -2.098354 | -1.495471 |
| H | 0.552213  | -2.113242 | -2.044181 |                                     |           |           |           |
| C | 3.146535  | -4.165737 | -0.303956 |                                     |           |           |           |
| C | 3.111636  | -5.450813 | 0.251844  | <b>(R)-6-CP-R E= -3846.86114415</b> |           |           |           |
| C | 4.366478  | -3.661778 | -0.778631 | H                                   | -0.367560 | 2.424484  | -2.209949 |
| C | 4.273653  | -6.221752 | 0.316784  | C                                   | -0.211832 | -0.285744 | 3.345789  |
|   |           |           |           | C                                   | -0.674121 | 1.017505  | 3.551386  |

|   |           |           |           |   |           |           |           |
|---|-----------|-----------|-----------|---|-----------|-----------|-----------|
| C | -1.402786 | 1.368188  | 4.698538  | H | -2.822235 | -7.433389 | -2.997937 |
| C | -1.645517 | 0.382909  | 5.654745  | H | -0.517609 | -7.459919 | -2.040306 |
| C | -1.182473 | -0.922482 | 5.468390  | C | 0.392042  | -3.085772 | 0.216597  |
| C | -0.471710 | -1.255613 | 4.313467  | C | 0.654270  | -4.013403 | 1.284779  |
| H | 0.326700  | -0.524939 | 2.436551  | C | 1.388407  | -2.180864 | -0.128441 |
| H | -2.206010 | 0.640158  | 6.550232  | C | -0.349676 | -4.848472 | 1.851256  |
| H | -1.380780 | -1.677605 | 6.223511  | C | 1.974508  | -4.078266 | 1.838485  |
| H | -0.120668 | -2.270910 | 4.156554  | C | 2.719581  | -2.251246 | 0.384770  |
| C | -1.914663 | 2.783990  | 4.805306  | C | -0.057856 | -5.713543 | 2.884036  |
| H | -2.886296 | 2.871031  | 4.297390  | H | -1.361372 | -4.791098 | 1.466454  |
| H | -2.076903 | 3.066138  | 5.850462  | C | 2.247201  | -4.995975 | 2.889308  |
| C | -0.911518 | 3.747474  | 4.159401  | C | 2.983470  | -3.218252 | 1.333243  |
| H | -1.293411 | 4.770915  | 4.129369  | C | 1.255706  | -5.799959 | 3.403999  |
| H | 0.019845  | 3.765176  | 4.745033  | H | -0.844884 | -6.334713 | 3.303397  |
| C | -0.537283 | 3.289420  | 2.763601  | H | 3.258024  | -5.040758 | 3.288112  |
| N | -0.421265 | 2.002028  | 2.545930  | H | 3.992897  | -3.313978 | 1.724963  |
| H | -0.064325 | 1.600561  | 1.621651  | H | 1.475140  | -6.493019 | 4.211637  |
| C | -0.953596 | 3.753819  | -0.920068 | C | 3.808003  | -1.346794 | -0.113549 |
| C | 0.298794  | 3.944872  | -0.027067 | C | 4.306841  | -1.496927 | -1.427435 |
| H | -1.616047 | 3.010859  | -0.449606 | C | 4.384966  | -0.375133 | 0.741336  |
| H | 0.779095  | 2.976348  | 0.128273  | C | 5.361509  | -0.679859 | -1.856092 |
| C | -1.660847 | -1.918134 | -0.604689 | C | 5.439215  | 0.407747  | 0.261817  |
| C | -0.906638 | -3.081923 | -0.519768 | C | 5.952014  | 0.282183  | -1.034752 |
| C | -1.389551 | -4.264736 | -1.182218 | H | 5.727693  | -0.816169 | -2.867145 |
| C | -2.691965 | -4.239897 | -1.777064 | H | 5.873945  | 1.145008  | 0.931227  |
| C | -3.453742 | -3.044505 | -1.732113 | C | -3.810474 | -0.634681 | -1.168202 |
| C | -2.961317 | -1.874667 | -1.191722 | C | -4.570840 | -0.337120 | -0.012934 |
| H | 0.383015  | -5.484367 | -0.904334 | C | -3.907675 | 0.200688  | -2.303684 |
| C | -0.622106 | -5.456660 | -1.308432 | C | -5.407713 | 0.781931  | -0.019524 |
| C | -3.192821 | -5.406362 | -2.415991 | C | -4.762277 | 1.312020  | -2.253749 |
| H | -4.455230 | -3.050948 | -2.153870 | C | -5.523928 | 1.630441  | -1.127059 |
| C | -2.432371 | -6.549876 | -2.499864 | H | -5.992420 | 0.992166  | 0.872085  |
| C | -1.128787 | -6.565836 | -1.950155 | H | -4.821487 | 1.944109  | -3.130902 |
| H | -4.188284 | -5.370456 | -2.852471 | O | 1.116035  | -1.214893 | -1.076665 |

|   |           |           |           |   |           |           |           |
|---|-----------|-----------|-----------|---|-----------|-----------|-----------|
| O | -1.173210 | -0.764239 | -0.015853 | H | -3.741329 | -1.961336 | 1.103019  |
| P | 0.109799  | 0.037030  | -0.698155 | C | -4.210203 | -0.430896 | 2.508857  |
| O | 0.682870  | 0.835940  | 0.463803  | H | -4.999203 | 0.289463  | 2.757037  |
| C | 3.773910  | -2.550410 | -2.398852 | H | -3.270941 | 0.118080  | 2.390646  |
| H | 2.946181  | -3.075971 | -1.915498 | H | -4.101319 | -1.108215 | 3.364311  |
| C | 4.847631  | -3.611603 | -2.714551 | C | -5.856927 | -2.008338 | 1.390007  |
| H | 5.213368  | -4.091772 | -1.799608 | H | -6.057168 | -2.625990 | 0.507453  |
| H | 5.710972  | -3.171821 | -3.228134 | H | -6.709412 | -1.331166 | 1.522869  |
| H | 4.434613  | -4.391132 | -3.366440 | H | -5.812790 | -2.669269 | 2.264770  |
| C | 3.214784  | -1.921868 | -3.689646 | O | -0.244995 | 0.706005  | -1.985292 |
| H | 2.427219  | -1.198040 | -3.461981 | S | -0.231873 | 4.586200  | 1.668018  |
| H | 2.789175  | -2.700304 | -4.334665 | O | -0.571282 | 3.392475  | -2.213770 |
| H | 3.997599  | -1.410919 | -4.263236 | C | 1.305409  | 4.947452  | -0.547749 |
| C | 3.905615  | -0.139558 | 2.174758  | C | 0.925842  | 6.246295  | -0.915643 |
| H | 3.016616  | -0.754304 | 2.338913  | C | 2.651763  | 4.577201  | -0.662120 |
| C | 4.965143  | -0.576211 | 3.206090  | C | 1.873197  | 7.155331  | -1.385746 |
| H | 5.236357  | -1.630736 | 3.082425  | H | -0.115569 | 6.550158  | -0.846085 |
| H | 4.589286  | -0.440410 | 4.227913  | C | 3.598787  | 5.483933  | -1.139298 |
| H | 5.884400  | 0.013682  | 3.107193  | H | 2.955394  | 3.569848  | -0.388847 |
| C | 3.483564  | 1.322972  | 2.411334  | C | 3.212485  | 6.776241  | -1.499290 |
| H | 2.713367  | 1.612608  | 1.691392  | H | 1.563731  | 8.157389  | -1.670262 |
| H | 4.329081  | 2.014502  | 2.316638  | H | 4.637318  | 5.178019  | -1.231142 |
| H | 3.077233  | 1.439246  | 3.424601  | H | 3.949425  | 7.483120  | -1.871002 |
| C | -3.140138 | -0.088718 | -3.594632 | H | -1.510954 | 4.696282  | -0.982091 |
| H | -2.262350 | -0.685860 | -3.330859 | C | -6.459001 | 2.853142  | -1.064868 |
| C | -2.620761 | 1.178179  | -4.298339 | C | -5.997129 | 3.794465  | 0.073280  |
| H | -1.921054 | 0.893901  | -5.092643 | C | -6.463864 | 3.660172  | -2.377454 |
| H | -2.095126 | 1.841339  | -3.608191 | C | -7.907114 | 2.385700  | -0.784496 |
| H | -3.432150 | 1.744598  | -4.773225 | H | -6.010893 | 3.291852  | 1.046393  |
| C | -4.001910 | -0.911319 | -4.576249 | H | -4.975538 | 4.149673  | -0.106131 |
| H | -4.907172 | -0.357836 | -4.856375 | H | -6.655561 | 4.669957  | 0.139150  |
| H | -4.313787 | -1.868271 | -4.146394 | H | -6.809007 | 3.057014  | -3.224764 |
| H | -3.439219 | -1.122258 | -5.494014 | H | -7.142897 | 4.515561  | -2.281907 |
| C | -4.539152 | -1.224177 | 1.231605  | H | -5.469504 | 4.051229  | -2.620325 |

|                                      |           |           |           |   |           |           |           |
|--------------------------------------|-----------|-----------|-----------|---|-----------|-----------|-----------|
| H                                    | -8.583907 | 3.247651  | -0.727916 | C | 1.499841  | -3.135946 | 2.745419  |
| H                                    | -8.265075 | 1.724449  | -1.581928 | N | 0.859728  | -1.960076 | 2.694484  |
| H                                    | -7.984276 | 1.838787  | 0.161185  | H | 0.435102  | -1.640969 | 1.801098  |
| C                                    | 7.116841  | 1.178400  | -1.494612 | C | 2.291488  | -3.189212 | -0.919341 |
| C                                    | 7.540429  | 0.894662  | -2.948659 | C | 1.123212  | -3.672571 | -0.182165 |
| C                                    | 6.692864  | 2.664176  | -1.401342 | H | 2.478324  | -2.123159 | -0.780054 |
| C                                    | 8.343367  | 0.939954  | -0.581792 | C | 0.338935  | 2.445238  | -0.396079 |
| H                                    | 7.887073  | -0.136887 | -3.078515 | C | -0.869841 | 3.129141  | -0.374478 |
| H                                    | 6.720487  | 1.071490  | -3.653780 | C | -0.933909 | 4.427778  | -0.993216 |
| H                                    | 8.366920  | 1.558112  | -3.228670 | C | 0.275809  | 5.026031  | -1.472758 |
| H                                    | 6.417181  | 2.943340  | -0.378659 | C | 1.494936  | 4.310326  | -1.365306 |
| H                                    | 7.516464  | 3.317452  | -1.716110 | C | 1.553613  | 3.023792  | -0.870970 |
| H                                    | 5.831592  | 2.864463  | -2.049341 | H | -3.084524 | 4.688985  | -0.874121 |
| H                                    | 9.180066  | 1.579381  | -0.890090 | C | -2.150811 | 5.139627  | -1.188943 |
| H                                    | 8.120744  | 1.163458  | 0.466877  | C | 0.232681  | 6.316015  | -2.067723 |
| H                                    | 8.674755  | -0.103418 | -0.637205 | H | 2.409479  | 4.786734  | -1.708874 |
| <b>(R)-6-TS4-R E= -3846.84173783</b> |           |           |           | C | -0.959065 | 6.986189  | -2.219826 |
| C                                    | -0.381649 | -0.150518 | 3.736629  | C | -2.162318 | 6.381370  | -1.786307 |
| C                                    | 0.577635  | -1.162968 | 3.836070  | H | 1.164052  | 6.756911  | -2.415336 |
| C                                    | 1.279756  | -1.385364 | 5.030668  | H | -0.981567 | 7.968821  | -2.683045 |
| C                                    | 0.981418  | -0.587375 | 6.136201  | H | -3.107173 | 6.898373  | -1.931105 |
| C                                    | 0.019195  | 0.421906  | 6.054481  | C | -2.078827 | 2.508368  | 0.243105  |
| C                                    | -0.654860 | 0.641935  | 4.851133  | C | -2.827621 | 3.173919  | 1.275729  |
| H                                    | -0.890184 | 0.011308  | 2.791716  | C | -2.513822 | 1.260088  | -0.183656 |
| H                                    | 1.515299  | -0.756234 | 7.068721  | C | -2.373459 | 4.356293  | 1.924307  |
| H                                    | -0.199371 | 1.034108  | 6.924722  | C | -4.071704 | 2.606962  | 1.703499  |
| H                                    | -1.398256 | 1.430113  | 4.774071  | C | -3.762459 | 0.690023  | 0.207325  |
| C                                    | 2.352348  | -2.449289 | 5.031144  | C | -3.120191 | 4.956835  | 2.914734  |
| H                                    | 3.299848  | -2.017107 | 4.675475  | H | -1.417719 | 4.780455  | 1.638815  |
| H                                    | 2.538701  | -2.817482 | 6.045602  | C | -4.827429 | 3.262052  | 2.713712  |
| C                                    | 1.955911  | -3.612945 | 4.112766  | C | -4.522256 | 1.396077  | 1.117884  |
| H                                    | 2.772870  | -4.323050 | 3.965430  | C | -4.366680 | 4.414496  | 3.308133  |
| H                                    | 1.113506  | -4.168569 | 4.550194  | H | -2.746144 | 5.854118  | 3.400538  |
|                                      |           |           |           | H | -5.775318 | 2.823738  | 3.017326  |

|   |           |           |           |   |           |           |           |
|---|-----------|-----------|-----------|---|-----------|-----------|-----------|
| H | -5.490562 | 1.002921  | 1.416437  | C | -5.157609 | -1.880773 | 2.856893  |
| H | -4.949951 | 4.902534  | 4.084258  | H | -5.852889 | -1.046429 | 2.710838  |
| C | -4.264281 | -0.600099 | -0.372221 | H | -4.828466 | -1.868651 | 3.903338  |
| C | -4.679344 | -0.656660 | -1.721857 | H | -5.718232 | -2.809066 | 2.692999  |
| C | -4.385037 | -1.754172 | 0.441113  | C | -2.943432 | -2.918956 | 2.188459  |
| C | -5.204023 | -1.854108 | -2.226885 | H | -2.084549 | -2.837838 | 1.517393  |
| C | -4.923658 | -2.918531 | -0.113838 | H | -3.396132 | -3.909552 | 2.060489  |
| C | -5.341904 | -3.003903 | -1.447075 | H | -2.583101 | -2.852582 | 3.222769  |
| H | -5.518826 | -1.871185 | -3.264231 | C | 2.770302  | 1.890604  | -3.363586 |
| H | -5.014659 | -3.793849 | 0.523289  | H | 1.735856  | 2.206122  | -3.200783 |
| C | 2.867055  | 2.297952  | -0.817190 | C | 2.707910  | 0.543679  | -4.107376 |
| C | 3.566869  | 2.194682  | 0.408998  | H | 2.161544  | 0.664667  | -5.050727 |
| C | 3.450790  | 1.786685  | -1.997474 | H | 2.181331  | -0.200000 | -3.505202 |
| C | 4.829104  | 1.596722  | 0.421860  | H | 3.705883  | 0.162323  | -4.356954 |
| C | 4.721127  | 1.194461  | -1.925727 | C | 3.453611  | 2.960525  | -4.240166 |
| C | 5.438506  | 1.088204  | -0.732507 | H | 4.496778  | 2.692831  | -4.449404 |
| H | 5.360255  | 1.540357  | 1.367852  | H | 3.455361  | 3.941954  | -3.753312 |
| H | 5.156260  | 0.818610  | -2.844445 | H | 2.933788  | 3.059869  | -5.200907 |
| O | -1.746414 | 0.562105  | -1.100504 | C | 3.011269  | 2.769646  | 1.711762  |
| O | 0.400850  | 1.173003  | 0.148796  | H | 1.970477  | 3.056966  | 1.539383  |
| P | -0.322103 | -0.102891 | -0.610352 | C | 3.005486  | 1.739397  | 2.854985  |
| O | -0.533889 | -1.134272 | 0.474977  | H | 4.021597  | 1.454105  | 3.153719  |
| C | -4.617157 | 0.551714  | -2.656593 | H | 2.469298  | 0.832922  | 2.558683  |
| H | -4.173823 | 1.387282  | -2.108451 | H | 2.506422  | 2.152289  | 3.739378  |
| C | -6.028112 | 1.001451  | -3.086565 | C | 3.771125  | 4.048007  | 2.118697  |
| H | -6.653789 | 1.231798  | -2.216683 | H | 3.717579  | 4.807222  | 1.330345  |
| H | -6.538894 | 0.224873  | -3.668284 | H | 4.830824  | 3.837174  | 2.307467  |
| H | -5.968999 | 1.900723  | -3.711820 | H | 3.345293  | 4.477285  | 3.034158  |
| C | -3.719092 | 0.289404  | -3.880850 | O | 0.410179  | -0.487219 | -1.872183 |
| H | -2.706854 | 0.015835  | -3.569377 | H | 0.908190  | -4.731834 | -0.167936 |
| H | -3.653815 | 1.190233  | -4.503482 | H | 0.326077  | -2.973079 | 0.043728  |
| H | -4.116859 | -0.517482 | -4.508470 | O | 1.712333  | -3.873707 | 1.748855  |
| C | -3.947524 | -1.785278 | 1.906491  | S | 1.160538  | -3.342942 | -2.421253 |
| H | -3.430840 | -0.846582 | 2.124146  | H | 0.667659  | -2.024339 | -2.275811 |



|   |           |           |           |   |           |           |           |
|---|-----------|-----------|-----------|---|-----------|-----------|-----------|
| C | 2.751894  | 2.566920  | -1.303007 | C | 4.519865  | 1.397958  | 0.051215  |
| H | -0.929701 | 5.841323  | -1.419169 | C | 3.915762  | 0.472493  | -2.140143 |
| C | 0.067415  | 5.854999  | -1.843390 | C | 5.490511  | 0.398088  | 0.182140  |
| C | 2.615583  | 5.901477  | -3.002364 | C | 4.898648  | -0.509452 | -1.960083 |
| H | 4.112999  | 3.742129  | -2.447157 | C | 5.695254  | -0.562166 | -0.812321 |
| C | 1.744434  | 6.944071  | -3.219339 | H | 6.113552  | 0.366793  | 1.071825  |
| C | 0.453414  | 6.909769  | -2.641600 | H | 5.050655  | -1.258998 | -2.730216 |
| H | 3.603976  | 5.902917  | -3.455955 | O | -1.255212 | 1.545245  | -1.001136 |
| H | 2.038142  | 7.784522  | -3.842181 | O | 1.089320  | 1.450152  | 0.037990  |
| H | -0.244109 | 7.720488  | -2.834388 | P | -0.121553 | 0.451917  | -0.505737 |
| C | -0.684974 | 3.628120  | 0.014871  | O | -0.589453 | -0.253497 | 0.758102  |
| C | -1.010721 | 4.661145  | 0.962136  | C | -4.070969 | 2.479527  | -2.384920 |
| C | -1.596931 | 2.597721  | -0.175684 | H | -3.292372 | 3.140010  | -1.994408 |
| C | -0.077943 | 5.651289  | 1.380697  | C | -5.254317 | 3.379945  | -2.793831 |
| C | -2.318683 | 4.678659  | 1.547087  | H | -5.650435 | 3.931951  | -1.933697 |
| C | -2.916920 | 2.614495  | 0.369776  | H | -6.076563 | 2.795122  | -3.222728 |
| C | -0.427829 | 6.616079  | 2.301017  | H | -4.935366 | 4.108870  | -3.548669 |
| H | 0.926456  | 5.634308  | 0.973432  | C | -3.476593 | 1.751385  | -3.605847 |
| C | -2.654206 | 5.699388  | 2.477953  | H | -2.610444 | 1.148440  | -3.318412 |
| C | -3.251559 | 3.670154  | 1.193011  | H | -3.152050 | 2.480378  | -4.358219 |
| C | -1.732249 | 6.651441  | 2.849204  | H | -4.213142 | 1.092486  | -4.081120 |
| H | 0.305935  | 7.356231  | 2.608911  | C | -3.834054 | 0.640287  | 2.446919  |
| H | -3.655698 | 5.704814  | 2.901924  | H | -2.994327 | 1.338815  | 2.492949  |
| H | -4.256874 | 3.724892  | 1.602687  | C | -4.889819 | 1.117739  | 3.463748  |
| H | -1.998771 | 7.423030  | 3.566321  | H | -5.249225 | 2.125778  | 3.227745  |
| C | -3.927672 | 1.558635  | 0.028378  | H | -4.468495 | 1.137390  | 4.476493  |
| C | -4.475131 | 1.506477  | -1.277422 | H | -5.760634 | 0.451290  | 3.477074  |
| C | -4.382011 | 0.654436  | 1.019460  | C | -3.283938 | -0.744040 | 2.839454  |
| C | -5.458898 | 0.553654  | -1.562404 | H | -2.524096 | -1.063732 | 2.121285  |
| C | -5.375469 | -0.274203 | 0.685437  | H | -4.073033 | -1.504069 | 2.876532  |
| C | -5.925141 | -0.343345 | -0.597218 | H | -2.826435 | -0.697704 | 3.836239  |
| H | -5.886225 | 0.511567  | -2.560366 | C | 3.109147  | 0.491271  | -3.439321 |
| H | -5.731589 | -0.969177 | 1.440829  | H | 2.172303  | 1.019740  | -3.240356 |
| C | 3.729748  | 1.439046  | -1.121899 | C | 2.731054  | -0.913003 | -3.944237 |



|   |           |           |           |   |            |           |           |
|---|-----------|-----------|-----------|---|------------|-----------|-----------|
| H | 2.007810  | -0.823045 | -4.762799 | C | 6.494082   | -2.749189 | 0.159974  |
| H | 2.276176  | -1.520498 | -3.159012 | C | 9.001010   | -2.504214 | -1.154046 |
| H | 3.600112  | -1.452936 | -4.340614 | C | 7.513332   | -3.762986 | 0.315010  |
| C | 3.867865  | 1.255314  | -4.545408 | C | 8.736451   | -3.613834 | -0.345448 |
| H | 4.826057  | 0.768301  | -4.766612 | H | 9.500410   | -4.380004 | -0.228528 |
| H | 4.075388  | 2.291659  | -4.260909 | C | -6.982840  | -1.349150 | -0.928133 |
| H | 3.278121  | 1.272010  | -5.470013 | C | -8.312262  | -1.149911 | -0.484768 |
| C | 4.387991  | 2.444402  | 1.157553  | C | -6.650664  | -2.498039 | -1.685486 |
| H | 3.468302  | 3.009394  | 0.981327  | C | -9.328155  | -2.128071 | -0.804318 |
| C | 4.263084  | 1.816596  | 2.557083  | C | -7.676931  | -3.464865 | -2.006619 |
| H | 5.179839  | 1.295660  | 2.857914  | C | -8.983948  | -3.255315 | -1.556411 |
| H | 3.436386  | 1.099851  | 2.590426  | H | -9.752330  | -3.987080 | -1.798403 |
| H | 4.065945  | 2.593001  | 3.305507  | C | 6.038557   | -5.046719 | 1.772702  |
| C | 5.557033  | 3.448485  | 1.105644  | H | 5.846680   | -5.918650 | 2.392523  |
| H | 5.601409  | 3.953316  | 0.134316  | C | 5.026884   | -4.055630 | 1.614753  |
| H | 6.518176  | 2.944737  | 1.264679  | H | 4.068517   | -4.186271 | 2.111529  |
| H | 5.445165  | 4.215371  | 1.882273  | C | 9.520198   | -0.244675 | -2.760889 |
| O | 0.277193  | -0.327661 | -1.715724 | H | 9.734833   | 0.622746  | -3.379436 |
| S | 0.684339  | -3.708107 | 2.437982  | C | 10.509096  | -1.259218 | -2.610058 |
| O | 0.892696  | -2.963516 | -1.566186 | H | 11.465261  | -1.157768 | -3.116431 |
| C | -0.725778 | -4.572230 | 0.290226  | C | -6.043333  | -4.824625 | -3.201902 |
| C | -0.130201 | -5.824573 | 0.081133  | H | -5.793155  | -5.705272 | -3.787491 |
| C | -2.112901 | -4.447844 | 0.139475  | C | -5.024838  | -3.882158 | -2.876847 |
| C | -0.907243 | -6.928496 | -0.268400 | H | -4.006143  | -4.056721 | -3.211372 |
| H | 0.946201  | -5.939701 | 0.179096  | C | -8.710951  | 0.004759  | 0.264897  |
| C | -2.890467 | -5.549471 | -0.219793 | C | -10.006353 | 0.171571  | 0.681283  |
| H | -2.584293 | -3.479829 | 0.289767  | C | -11.000216 | -0.802492 | 0.376043  |
| C | -2.288960 | -6.793454 | -0.420193 | H | -7.965021  | 0.756429  | 0.498576  |
| H | -0.431771 | -7.892114 | -0.430210 | H | -10.282640 | 1.057454  | 1.247105  |
| H | -3.961765 | -5.430361 | -0.351758 | H | -12.021758 | -0.653706 | 0.715599  |
| H | -2.893125 | -7.652689 | -0.698896 | C | -7.328431  | -4.619718 | -2.775689 |
| H | 2.024522  | -3.917208 | -0.179717 | H | -8.112668  | -5.334545 | -3.014548 |
| C | 6.745428  | -1.617841 | -0.651966 | C | -5.318143  | -2.760832 | -2.143506 |
| C | 7.990251  | -1.482177 | -1.311704 | H | -4.533648  | -2.051379 | -1.904156 |

C 10.253814 -2.353544 -1.827891  
H 11.002500 -3.132387 -1.702550  
C 8.305936 -0.351770 -2.133781  
H 7.560950 0.426876 -2.254447  
C 5.246844 -2.948115 0.836873  
H 4.468833 -2.202183 0.716939  
C 7.243334 -4.901155 1.138743  
H 8.021048 -5.653755 1.246844  
C -10.667167 -1.915946 -0.347730  
H -11.418485 -2.663071 -0.593208

**(R)-7-TS4-R E= -4608.98148470**

C 0.552317 0.363419 4.104703  
C 1.064655 -0.925194 3.929027  
C 1.919132 -1.504864 4.880125  
C 2.232006 -0.773962 6.026855  
C 1.720098 0.511137 6.220949  
C 0.885894 1.078056 5.255584  
H -0.089695 0.790524 3.340876  
H 2.888569 -1.216834 6.772290  
H 1.974174 1.065990 7.119490  
H 0.488737 2.079315 5.395231  
C 2.471289 -2.879005 4.583362  
H 3.368291 -2.792673 3.952101  
H 2.780103 -3.384969 5.504054  
C 1.421345 -3.718552 3.844155  
H 1.822251 -4.671995 3.493255  
H 0.576637 -3.942480 4.512106  
C 0.852403 -2.982200 2.644591  
N 0.723502 -1.652263 2.756328  
H 0.286262 -1.104647 1.991519  
C 0.555475 -3.303006 -1.120832  
C -0.441856 -3.066133 -0.080841  
H 1.335988 -2.542039 -1.147377

C 1.160476 2.954220 -0.670676  
C 0.203933 3.952451 -0.794138  
C 0.465068 5.038729 -1.702216  
C 1.752101 5.127800 -2.324939  
C 2.724355 4.129519 -2.060178  
C 2.451633 3.030162 -1.273966  
H -1.502782 5.946357 -1.616640  
C -0.509515 6.017524 -2.043961  
C 2.029181 6.205502 -3.209047  
H 3.709118 4.230872 -2.508677  
C 1.069598 7.147438 -3.500255  
C -0.215840 7.040685 -2.919038  
H 3.015597 6.261936 -3.663457  
H 1.290296 7.963018 -4.183422  
H -0.981901 7.769715 -3.169221  
C -1.070070 3.874232 -0.019476  
C -1.495559 4.944669 0.843076  
C -1.877304 2.748325 -0.118111  
C -0.668897 6.056632 1.166673  
C -2.797694 4.879929 1.436975  
C -3.187114 2.675322 0.442687  
C -1.116205 7.058142 2.000696  
H 0.333544 6.105640 0.757634  
C -3.236048 5.938507 2.278130  
C -3.623582 3.755508 1.181593  
C -2.417184 7.009040 2.554840  
H -0.460916 7.891828 2.238458  
H -4.232098 5.877896 2.710533  
H -4.627100 3.741536 1.598668  
H -2.760573 7.809062 3.204978  
C -4.088173 1.498606 0.202031  
C -4.677270 1.314144 -1.072748  
C -4.398965 0.608987 1.259096  
C -5.563972 0.248401 -1.262646

|   |           |           |           |   |           |           |           |
|---|-----------|-----------|-----------|---|-----------|-----------|-----------|
| C | -5.300918 | -0.435165 | 1.020514  | H | -3.898987 | -1.363059 | 3.288033  |
| C | -5.892151 | -0.634722 | -0.229838 | H | -2.653138 | -0.411847 | 4.105438  |
| H | -6.024539 | 0.104029  | -2.236178 | C | 3.144653  | 1.019453  | -3.388166 |
| H | -5.550176 | -1.120200 | 1.826017  | H | 2.251584  | 1.648018  | -3.331958 |
| C | 3.492981  | 1.979484  | -1.017284 | C | 2.676128  | -0.373492 | -3.845288 |
| C | 4.185171  | 1.977200  | 0.216842  | H | 2.148465  | -0.290719 | -4.803028 |
| C | 3.801941  | 1.015190  | -2.007284 | H | 1.985308  | -0.799760 | -3.114525 |
| C | 5.149815  | 0.991031  | 0.452367  | H | 3.514938  | -1.063891 | -3.995972 |
| C | 4.779563  | 0.052677  | -1.725331 | C | 4.093602  | 1.634596  | -4.438284 |
| C | 5.452692  | 0.015280  | -0.500577 | H | 5.007849  | 1.036480  | -4.538307 |
| H | 5.682136  | 0.978141  | 1.399706  | H | 4.392369  | 2.653294  | -4.168474 |
| H | 5.027642  | -0.692825 | -2.475137 | H | 3.607287  | 1.673802  | -5.420653 |
| O | -1.443975 | 1.673965  | -0.874101 | C | 3.950649  | 3.041058  | 1.288337  |
| O | 0.893783  | 1.864975  | 0.144801  | H | 3.129239  | 3.682272  | 0.956595  |
| P | -0.199124 | 0.732441  | -0.342041 | C | 3.529964  | 2.431628  | 2.637238  |
| O | -0.576423 | -0.038836 | 0.901143  | H | 4.320576  | 1.805401  | 3.067376  |
| C | -4.414543 | 2.256964  | -2.247111 | H | 2.632746  | 1.816412  | 2.525751  |
| H | -3.697369 | 3.015515  | -1.922672 | H | 3.309771  | 3.225613  | 3.361206  |
| C | -5.697603 | 3.004252  | -2.662956 | C | 5.189674  | 3.945429  | 1.446317  |
| H | -6.119131 | 3.566790  | -1.822083 | H | 5.457515  | 4.420722  | 0.495723  |
| H | -6.468998 | 2.312917  | -3.022049 | H | 6.060658  | 3.375765  | 1.791907  |
| H | -5.481755 | 3.712327  | -3.472206 | H | 4.996114  | 4.737910  | 2.179643  |
| C | -3.783253 | 1.523410  | -3.445730 | O | 0.284139  | -0.015332 | -1.563670 |
| H | -2.843019 | 1.044932  | -3.156044 | H | -1.192765 | -3.816753 | 0.123257  |
| H | -3.569960 | 2.232828  | -4.254526 | H | -0.622244 | -2.053623 | 0.262536  |
| H | -4.453133 | 0.754228  | -3.848346 | O | 0.513186  | -3.647919 | 1.632476  |
| C | -3.793815 | 0.742216  | 2.656839  | S | -0.819565 | -2.703915 | -2.271069 |
| H | -2.992620 | 1.484893  | 2.604290  | H | -0.459432 | -1.348715 | -2.083163 |
| C | -4.835905 | 1.246864  | 3.675036  | C | 1.059253  | -4.683126 | -1.434738 |
| H | -5.256378 | 2.214022  | 3.377821  | C | 0.668018  | -5.814155 | -0.708018 |
| H | -4.380269 | 1.366373  | 4.665696  | C | 1.961405  | -4.835479 | -2.498499 |
| H | -5.668350 | 0.539381  | 3.772718  | C | 1.161210  | -7.075683 | -1.049850 |
| C | -3.153885 | -0.571858 | 3.142712  | H | 0.008743  | -5.713278 | 0.146927  |
| H | -2.409095 | -0.919796 | 2.422507  | C | 2.452816  | -6.093310 | -2.837476 |

|   |            |           |           |                                 |           |           |           |
|---|------------|-----------|-----------|---------------------------------|-----------|-----------|-----------|
| H | 2.270840   | -3.961123 | -3.065861 | C                               | -5.106228 | -3.063257 | -1.680525 |
| C | 2.049939   | -7.219982 | -2.114838 | C                               | -4.732252 | -4.187750 | -2.369972 |
| H | 0.851661   | -7.944817 | -0.475784 | H                               | -4.388416 | -2.267434 | -1.514548 |
| H | 3.150936   | -6.194597 | -3.663637 | H                               | -3.717559 | -4.274001 | -2.749319 |
| H | 2.432511   | -8.202335 | -2.377937 | C                               | -5.659516 | -5.246097 | -2.593732 |
| C | -6.851469  | -1.761607 | -0.454501 | H                               | -7.652547 | -5.953798 | -2.271324 |
| C | -8.172699  | -1.675534 | 0.046879  | H                               | -5.345877 | -6.128576 | -3.145103 |
| C | -6.436064  | -2.911820 | -1.167766 | H                               | 10.005020 | 1.709498  | -1.362746 |
| C | -8.655466  | -0.527898 | 0.756728  | H                               | 11.684102 | -0.070747 | -0.868713 |
| C | -9.093617  | -2.769261 | -0.169100 | C                               | 6.596283  | -4.635952 | 0.931014  |
| C | -7.368665  | -3.995392 | -1.385409 | C                               | 5.265446  | -4.909719 | 1.099757  |
| C | -9.940483  | -0.471805 | 1.230953  | H                               | 7.347960  | -5.398390 | 1.122712  |
| H | -7.982264  | 0.307497  | 0.913853  | H                               | 4.944949  | -5.896701 | 1.422626  |
| C | -10.424915 | -2.670448 | 0.345030  | C                               | 4.672411  | -2.649649 | 0.433693  |
| C | -8.668155  | -3.895848 | -0.879348 | C                               | 4.290664  | -3.900126 | 0.849282  |
| C | -10.839403 | -1.558196 | 1.027402  | H                               | 3.925428  | -1.884709 | 0.249430  |
| H | -11.103921 | -3.503450 | 0.177583  | H                               | 3.236542  | -4.131582 | 0.975952  |
| H | -9.365852  | -4.714926 | -1.043046 |                                 |           |           |           |
| C | 6.471609   | -1.044768 | -0.215765 | <b>(R)-C2 E= -1874.38440659</b> |           |           |           |
| C | 7.848336   | -0.771628 | -0.392628 | H                               | 1.229811  | -3.574454 | -0.848892 |
| C | 6.052506   | -2.321148 | 0.228448  | C                               | 1.516685  | 0.045992  | 0.254183  |
| C | 8.326957   | 0.499024  | -0.850206 | C                               | 0.702049  | 1.093204  | -0.144272 |
| C | 8.824962   | -1.801407 | -0.116134 | C                               | 1.285228  | 2.154790  | -0.919462 |
| C | 7.036535   | -3.346524 | 0.494452  | C                               | 2.698615  | 2.140155  | -1.155372 |
| C | 9.666904   | 0.737327  | -1.013950 | C                               | 3.479735  | 1.069455  | -0.655080 |
| H | 7.604484   | 1.277850  | -1.068378 | C                               | 2.922837  | 0.004478  | 0.026974  |
| C | 10.213398  | -1.509663 | -0.299183 | H                               | -0.555997 | 3.207621  | -1.371737 |
| C | 8.393409   | -3.058766 | 0.317746  | C                               | 0.519511  | 3.201314  | -1.503768 |
| C | 10.626009  | -0.278446 | -0.733570 | C                               | 3.291534  | 3.190486  | -1.908285 |
| H | 10.936618  | -2.293362 | -0.085481 | H                               | 4.553221  | 1.086676  | -0.823111 |
| H | 9.131253   | -3.832671 | 0.520478  | C                               | 2.523775  | 4.200392  | -2.440026 |
| H | -11.854075 | -1.496318 | 1.411610  | C                               | 1.122366  | 4.194877  | -2.244059 |
| H | -10.281703 | 0.411057  | 1.765118  | H                               | 4.367059  | 3.170919  | -2.067033 |
| C | -6.937358  | -5.150066 | -2.111520 | H                               | 2.986750  | 4.994053  | -3.019776 |

|   |           |           |           |                                 |           |           |           |
|---|-----------|-----------|-----------|---------------------------------|-----------|-----------|-----------|
| H | 0.514224  | 4.979448  | -2.685893 | P                               | 0.017597  | -2.081188 | 0.097032  |
| C | -0.753300 | 1.064576  | 0.188278  | O                               | -0.622588 | -3.063169 | 0.987317  |
| C | -1.384810 | 2.119851  | 0.933188  | O                               | 0.939029  | -2.676800 | -1.081853 |
| C | -1.523452 | -0.023770 | -0.190936 | H                               | -6.004888 | -4.198084 | -1.680845 |
| C | -0.664556 | 3.205823  | 1.503122  | H                               | -2.876748 | -1.350343 | -2.441196 |
| C | -2.799143 | 2.057178  | 1.153865  | H                               | -4.795332 | -1.459552 | 1.404576  |
| C | -2.932652 | -0.104330 | 0.003175  | H                               | 2.951081  | -1.262097 | 2.467903  |
| C | -1.311618 | 4.190190  | 2.217805  | H                               | 6.111004  | -4.045630 | 1.607278  |
| H | 0.411476  | 3.249157  | 1.381732  | H                               | 4.787890  | -1.293090 | -1.419507 |
| C | -3.438439 | 3.098752  | 1.880605  |                                 |           |           |           |
| C | -3.535268 | 0.953426  | 0.657576  |                                 |           |           |           |
| C | -2.714242 | 4.146408  | 2.400276  | <b>(R)-C3 E= -2336.49015629</b> |           |           |           |
| H | -0.737893 | 5.005347  | 2.650198  | H                               | 0.954219  | -2.276195 | -1.108559 |
| H | -4.514127 | 3.042252  | 2.028820  | C                               | 1.536809  | 1.338133  | -0.054505 |
| H | -4.612079 | 0.938955  | 0.802457  | C                               | 0.671663  | 2.398169  | -0.270463 |
| H | -3.212502 | 4.932805  | 2.960346  | C                               | 1.095835  | 3.458106  | -1.145161 |
| C | -3.741545 | -1.261272 | -0.465223 | C                               | 2.428452  | 3.425715  | -1.671397 |
| C | -3.610458 | -1.777217 | -1.765638 | C                               | 3.282254  | 2.342987  | -1.347230 |
| C | -4.702069 | -1.829486 | 0.387408  | C                               | 2.865861  | 1.281206  | -0.566446 |
| C | -4.422805 | -2.824063 | -2.198606 | H                               | -0.781947 | 4.541906  | -1.195278 |
| C | -5.511878 | -2.878771 | -0.046174 | C                               | 0.241409  | 4.520305  | -1.550850 |
| C | -5.376333 | -3.378889 | -1.342029 | C                               | 2.866551  | 4.473180  | -2.527279 |
| H | -4.311368 | -3.205679 | -3.210115 | H                               | 4.298176  | 2.349576  | -1.732920 |
| H | -6.242026 | -3.310892 | 0.632930  | C                               | 2.020186  | 5.497811  | -2.882041 |
| C | 3.769609  | -1.133948 | 0.474047  | C                               | 0.691301  | 5.511069  | -2.396229 |
| C | 4.721583  | -1.677378 | -0.405447 | H                               | 3.884797  | 4.439852  | -2.907278 |
| C | 3.677227  | -1.666984 | 1.771577  | H                               | 2.363757  | 6.289139  | -3.542403 |
| C | 5.559597  | -2.716812 | -0.001498 | H                               | 0.016546  | 6.308082  | -2.696317 |
| C | 4.516348  | -2.705462 | 2.174167  | C                               | -0.682842 | 2.385144  | 0.358432  |
| C | 5.460533  | -3.234557 | 1.291100  | C                               | -1.129811 | 3.441135  | 1.226140  |
| H | 6.284705  | -3.125966 | -0.700170 | C                               | -1.529459 | 1.309097  | 0.143195  |
| H | 4.432843  | -3.100029 | 3.183252  | C                               | -0.293541 | 4.516474  | 1.635205  |
| O | -0.891871 | -1.101508 | -0.821746 | C                               | -2.465452 | 3.390150  | 1.742491  |
| O | 0.938051  | -1.030279 | 0.929341  | C                               | -2.866465 | 1.240817  | 0.631601  |
|   |           |           |           | C                               | -0.763307 | 5.501534  | 2.476340  |

|   |           |           |           |                                 |           |           |           |
|---|-----------|-----------|-----------|---------------------------------|-----------|-----------|-----------|
| H | 0.732050  | 4.551826  | 1.286971  | C                               | -7.293786 | -3.145261 | -1.669320 |
| C | -2.924273 | 4.431996  | 2.594390  | C                               | -6.730418 | -4.166235 | 0.441363  |
| C | -3.303123 | 2.298368  | 1.407408  | C                               | -8.189235 | -4.181261 | -1.932145 |
| C | -2.095050 | 5.469035  | 2.953569  | H                               | -7.188223 | -2.332853 | -2.383023 |
| H | -0.102280 | 6.308583  | 2.780168  | C                               | -7.626289 | -5.202068 | 0.179398  |
| H | -3.944427 | 4.384386  | 2.967547  | H                               | -6.143820 | -4.181936 | 1.355689  |
| H | -4.324662 | 2.294449  | 1.777766  | C                               | -8.360082 | -5.214703 | -1.008627 |
| H | -2.454320 | 6.255792  | 3.611047  | H                               | -8.760720 | -4.176306 | -2.856730 |
| C | -3.769506 | 0.098336  | 0.336390  | H                               | -7.744064 | -6.006100 | 0.901278  |
| C | -3.915860 | -0.420195 | -0.961120 | H                               | -9.057769 | -6.022349 | -1.213051 |
| C | -4.549382 | -0.462945 | 1.360158  | C                               | 6.538331  | -3.123061 | 0.404834  |
| C | -4.812332 | -1.452038 | -1.220310 | C                               | 7.775116  | -3.180289 | -0.261033 |
| C | -5.443218 | -1.497243 | 1.098805  | C                               | 6.222874  | -4.154349 | 1.306618  |
| C | -5.595835 | -2.014540 | -0.197883 | C                               | 8.664047  | -4.230151 | -0.033998 |
| H | -4.889601 | -1.845224 | -2.230103 | H                               | 8.051745  | -2.380354 | -0.942290 |
| H | -6.043962 | -1.898415 | 1.910133  | C                               | 7.111755  | -5.204186 | 1.534504  |
| C | 3.773613  | 0.134941  | -0.301612 | H                               | 5.261926  | -4.145043 | 1.813491  |
| C | 3.926495  | -0.421291 | 0.980205  | C                               | 8.336578  | -5.247196 | 0.865185  |
| C | 4.545321  | -0.403165 | -1.345275 | H                               | 9.618269  | -4.248752 | -0.554076 |
| C | 4.818450  | -1.465766 | 1.204126  | H                               | 6.842699  | -5.994501 | 2.230412  |
| C | 5.435025  | -1.449670 | -1.118943 | H                               | 9.029300  | -6.065300 | 1.042850  |
| C | 5.592541  | -2.004978 | 0.161902  |                                 |           |           |           |
| H | 4.937691  | -1.851323 | 2.212667  |                                 |           |           |           |
| H | 5.990551  | -1.865230 | -1.955007 | <b>(R)-C4 E= -2188.88958457</b> |           |           |           |
| O | -1.058811 | 0.230506  | -0.613838 | H                               | -1.031192 | -2.620355 | 1.058960  |
| O | 1.095241  | 0.263111  | 0.719279  | C                               | -1.534087 | 0.983636  | 0.018347  |
| P | 0.008940  | -0.769233 | 0.088030  | C                               | -0.672620 | 2.037879  | 0.273698  |
| O | -0.446040 | -1.753230 | 1.083751  | C                               | -1.121612 | 3.090668  | 1.144446  |
| O | 0.658402  | -1.362932 | -1.260394 | C                               | -2.471610 | 3.059101  | 1.624065  |
| H | -4.441671 | -0.093169 | 2.375972  | C                               | -3.318282 | 1.983502  | 1.259692  |
| H | -3.323906 | -0.012300 | -1.773407 | C                               | -2.879744 | 0.926751  | 0.484307  |
| H | 3.355278  | -0.022751 | 1.811277  | H                               | 0.758532  | 4.164305  | 1.271417  |
| H | 4.421696  | -0.015562 | -2.352705 | C                               | -0.276742 | 4.144298  | 1.590834  |
| C | -6.548164 | -3.118297 | -0.477882 | C                               | -2.934388 | 4.099832  | 2.475115  |
|   |           |           |           | H                               | -4.346853 | 1.990687  | 1.610187  |

|   |           |           |           |   |           |           |           |
|---|-----------|-----------|-----------|---|-----------|-----------|-----------|
| C | -2.096177 | 5.116546  | 2.869859  | H | -4.856283 | -2.173788 | -2.386194 |
| C | -0.751069 | 5.128242  | 2.430798  | H | -6.082746 | -2.182183 | 1.737318  |
| H | -3.965306 | 4.067352  | 2.819401  | O | 1.041450  | -0.139652 | 0.650142  |
| H | -2.458845 | 5.902660  | 3.526290  | O | -1.069876 | -0.085161 | -0.751234 |
| H | -0.083451 | 5.918577  | 2.762904  | P | -0.010497 | -1.126922 | -0.090752 |
| C | 0.701602  | 2.026696  | -0.310381 | O | 0.467079  | -2.110898 | -1.076038 |
| C | 1.178724  | 3.091003  | -1.151277 | C | 6.578085  | -3.527892 | 0.713597  |
| C | 1.538920  | 0.946492  | -0.078934 | C | 7.566397  | -3.047414 | 1.803184  |
| C | 0.357235  | 4.170705  | -1.578695 | H | 8.260218  | -3.853830 | 2.071197  |
| C | 2.531457  | 3.044475  | -1.620985 | H | 7.047258  | -2.737104 | 2.716090  |
| C | 2.892375  | 0.882267  | -0.520311 | H | 8.156678  | -2.194640 | 1.448385  |
| C | 0.856083  | 5.163689  | -2.393325 | C | 5.776663  | -4.739394 | 1.247426  |
| H | -0.680020 | 4.202753  | -1.266436 | H | 5.069533  | -5.103885 | 0.493727  |
| C | 3.019920  | 4.094603  | -2.445819 | H | 5.204611  | -4.485218 | 2.145882  |
| C | 3.356361  | 1.948873  | -1.267426 | H | 6.455180  | -5.562171 | 1.504942  |
| C | 2.203837  | 5.135428  | -2.823691 | C | -6.591508 | -3.478463 | -0.704119 |
| H | 0.206088  | 5.973802  | -2.712495 | C | -7.588436 | -2.997343 | -1.785602 |
| H | 4.052497  | 4.050102  | -2.783593 | H | -8.288314 | -3.801721 | -2.043363 |
| H | 4.390563  | 1.948139  | -1.600736 | H | -7.077281 | -2.693050 | -2.704892 |
| H | 2.585958  | 5.928466  | -3.460474 | H | -8.171195 | -2.140694 | -1.427977 |
| C | 3.785454  | -0.263650 | -0.208073 | C | -5.799679 | -4.693997 | -1.243108 |
| C | 3.885150  | -0.805371 | 1.084676  | H | -6.483901 | -5.513134 | -1.496445 |
| C | 4.606896  | -0.807144 | -1.204238 | H | -5.090758 | -5.064224 | -0.493486 |
| C | 4.776910  | -1.837035 | 1.357548  | H | -5.231242 | -4.443371 | -2.144742 |
| C | 5.496989  | -1.844565 | -0.923128 | O | -0.705238 | -1.721909 | 1.235035  |
| C | 5.607594  | -2.385640 | 0.364243  | H | 4.533548  | -0.430397 | -2.220797 |
| H | 4.825237  | -2.219520 | 2.373512  | H | 3.267865  | -0.409274 | 1.884094  |
| H | 6.101888  | -2.234003 | -1.734424 | H | -3.294744 | -0.362974 | -1.920094 |
| C | -3.783499 | -0.213100 | 0.179057  | H | -4.506326 | -0.378900 | 2.201429  |
| C | -3.901228 | -0.757052 | -1.111983 | C | 7.397517  | -3.993346 | -0.504961 |
| C | -4.591513 | -0.758069 | 1.186572  | H | 6.755804  | -4.378551 | -1.305480 |
| C | -4.795699 | -1.790465 | -1.371318 | H | 8.010587  | -3.183545 | -0.917007 |
| C | -5.486141 | -1.795683 | 0.918316  | H | 8.075189  | -4.801495 | -0.206905 |
| C | -5.614281 | -2.338119 | -0.367257 | C | -7.401255 | -3.937795 | 0.523235  |

|                                 |           |           |           |   |           |           |           |
|---------------------------------|-----------|-----------|-----------|---|-----------|-----------|-----------|
| H                               | -6.754221 | -4.324121 | 1.319135  | H | 4.376612  | 2.342037  | -1.685212 |
| H                               | -8.007426 | -3.124778 | 0.939024  | H | 2.512166  | 6.304760  | -3.527067 |
| H                               | -8.084590 | -4.744014 | 0.233373  | C | 3.785440  | 0.083891  | -0.315671 |
| <b>(R)-C5 E= -2808.24370205</b> |           |           |           | C | 4.310146  | -0.066250 | 0.990467  |
| H                               | -0.824080 | -2.388926 | 1.023417  | C | 4.141200  | -0.835046 | -1.333124 |
| C                               | -1.540774 | 1.333328  | 0.079686  | C | 5.181135  | -1.127281 | 1.252077  |
| C                               | -0.663098 | 2.392060  | 0.256052  | C | 5.021690  | -1.875436 | -1.019504 |
| C                               | -1.087963 | 3.488755  | 1.087071  | C | 5.553896  | -2.045382 | 0.263420  |
| C                               | -2.439125 | 3.512528  | 1.562812  | H | 5.565446  | -1.258500 | 2.259647  |
| C                               | -3.308413 | 2.435889  | 1.252998  | H | 5.321457  | -2.564559 | -1.803243 |
| C                               | -2.883651 | 1.323710  | 0.555702  | C | -3.797500 | 0.160242  | 0.306687  |
| H                               | 0.817679  | 4.520597  | 1.178466  | C | -4.269773 | -0.102737 | -1.002904 |
| C                               | -0.219372 | 4.540290  | 1.491460  | C | -4.212113 | -0.663325 | 1.384694  |
| C                               | -2.880258 | 4.602151  | 2.362164  | C | -5.126735 | -1.186684 | -1.210381 |
| H                               | -4.335304 | 2.479421  | 1.605152  | C | -5.075719 | -1.732138 | 1.121970  |
| C                               | -2.019289 | 5.615521  | 2.714311  | C | -5.541861 | -2.020604 | -0.165596 |
| C                               | -0.672238 | 5.572403  | 2.284037  | H | -5.511780 | -1.370431 | -2.209213 |
| H                               | -3.912571 | 4.609420  | 2.703545  | H | -5.376431 | -2.379534 | 1.940362  |
| H                               | -2.365196 | 6.439466  | 3.332168  | O | 1.076178  | 0.199029  | 0.566039  |
| H                               | 0.014510  | 6.358595  | 2.585459  | O | -1.133839 | 0.234380  | -0.678418 |
| C                               | 0.687170  | 2.368443  | -0.379908 | P | -0.000069 | -0.786792 | -0.132326 |
| C                               | 1.147582  | 3.439144  | -1.225400 | O | 0.428320  | -1.720381 | -1.188617 |
| C                               | 1.536628  | 1.290831  | -0.180629 | C | 3.979085  | 0.901914  | 2.126418  |
| C                               | 0.308587  | 4.504151  | -1.656267 | H | 3.274109  | 1.647247  | 1.746721  |
| C                               | 2.501928  | 3.417501  | -1.692369 | C | 5.232303  | 1.671208  | 2.589900  |
| C                               | 2.886543  | 1.244160  | -0.628980 | H | 5.695270  | 2.213718  | 1.757869  |
| C                               | 0.792171  | 5.506270  | -2.468794 | H | 5.987245  | 0.994882  | 3.008099  |
| H                               | -0.730509 | 4.517331  | -1.349324 | H | 4.969642  | 2.398818  | 3.367446  |
| C                               | 2.974952  | 4.477413  | -2.513076 | C | 3.293291  | 0.192847  | 3.310192  |
| C                               | 3.344065  | 2.329719  | -1.347115 | H | 2.382640  | -0.319571 | 2.985424  |
| C                               | 2.142016  | 5.504286  | -2.892615 | H | 3.019752  | 0.922078  | 4.082509  |
| H                               | 0.127883  | 6.303223  | -2.791571 | H | 3.954517  | -0.548149 | 3.774684  |
| H                               | 4.008792  | 4.450507  | -2.848621 | C | 3.626708  | -0.719846 | -2.769110 |
|                                 |           |           |           | H | 2.821323  | 0.020500  | -2.780304 |



|   |           |           |           |   |                                 |           |           |
|---|-----------|-----------|-----------|---|---------------------------------|-----------|-----------|
| C | 4.735942  | -0.214286 | -3.714391 | C | -7.176846                       | -5.027659 | -1.813647 |
| H | 5.137961  | 0.752037  | -3.389372 | H | -5.534846                       | -3.722327 | -2.287964 |
| H | 4.347067  | -0.094568 | -4.732873 | C | -8.174682                       | -5.351102 | -0.891828 |
| H | 5.572538  | -0.922350 | -3.756138 | H | -9.091302                       | -4.822319 | 0.988006  |
| C | 3.024239  | -2.037251 | -3.293433 | H | -7.054701                       | -5.621711 | -2.715643 |
| H | 2.213705  | -2.378141 | -2.644839 | H | -8.838425                       | -6.191688 | -1.075336 |
| H | 3.777235  | -2.830895 | -3.368831 | C | 6.483572                        | -3.164093 | 0.566396  |
| H | 2.614764  | -1.881690 | -4.299108 | C | 7.577841                        | -2.982128 | 1.429693  |
| C | -3.775767 | -0.424054 | 2.832611  | C | 6.293586                        | -4.435598 | -0.001993 |
| H | -2.977835 | 0.323306  | 2.828901  | C | 8.449474                        | -4.032521 | 1.715210  |
| C | -3.202387 | -1.683109 | 3.509933  | H | 7.759454                        | -2.001168 | 1.860103  |
| H | -2.860111 | -1.438801 | 4.522450  | C | 7.165447                        | -5.486266 | 0.281897  |
| H | -2.345430 | -2.073563 | 2.954433  | H | 5.439141                        | -4.605893 | -0.650979 |
| H | -3.947462 | -2.481702 | 3.600554  | C | 8.247706                        | -5.289886 | 1.142234  |
| C | -4.940606 | 0.144248  | 3.670384  | H | 9.293425                        | -3.865606 | 2.379709  |
| H | -5.766804 | -0.573993 | 3.736594  | H | 6.993231                        | -6.462874 | -0.163252 |
| H | -5.341305 | 1.066350  | 3.235309  | H | 8.927103                        | -6.108519 | 1.364106  |
| H | -4.607788 | 0.367522  | 4.691291  |   |                                 |           |           |
| C | -3.934568 | 0.795580  | -2.193840 |   | <b>(R)-C6 E= -2660.64249695</b> |           |           |
| H | -3.210012 | 1.545278  | -1.864712 | H | -0.871125                       | -2.634605 | 1.072559  |
| C | -3.285055 | 0.018689  | -3.354458 | C | -1.547314                       | 1.050112  | 0.039570  |
| H | -3.970940 | -0.723033 | -3.780788 | C | -0.684169                       | 2.115608  | 0.244699  |
| H | -2.381061 | -0.501094 | -3.023797 | C | -1.151569                       | 3.216335  | 1.046785  |
| H | -3.006903 | 0.708421  | -4.160352 | C | -2.523265                       | 3.237083  | 1.459492  |
| C | -5.184581 | 1.563843  | -2.669706 | C | -3.372806                       | 2.154019  | 1.118117  |
| H | -5.617676 | 2.159300  | -1.858025 | C | -2.911207                       | 1.037192  | 0.451988  |
| H | -5.961228 | 0.880234  | -3.032441 | H | 0.744084                        | 4.256056  | 1.218552  |
| H | -4.926609 | 2.243469  | -3.490937 | C | -0.306532                       | 4.274302  | 1.482962  |
| O | -0.571767 | -1.468700 | 1.209573  | C | -3.005050                       | 4.330565  | 2.229545  |
| C | -6.451147 | -3.168827 | -0.415276 | H | -4.415305                       | 2.195874  | 1.421659  |
| C | -7.460853 | -3.506386 | 0.502514  | C | -2.165160                       | 5.349995  | 2.613856  |
| C | -6.324809 | -3.949350 | -1.577467 | C | -0.799417                       | 5.309721  | 2.246808  |
| C | -8.312529 | -4.585274 | 0.267702  | H | -4.051972                       | 4.335704  | 2.523235  |
| H | -7.594265 | -2.900619 | 1.394555  | H | -2.542512                       | 6.176644  | 3.209332  |

|   |           |           |           |   |           |           |           |
|---|-----------|-----------|-----------|---|-----------|-----------|-----------|
| H | -0.130457 | 6.100731  | 2.574508  | P | 0.014246  | -1.061030 | -0.076207 |
| C | 0.690858  | 2.097092  | -0.335792 | O | 0.482491  | -2.015594 | -1.096266 |
| C | 1.174682  | 3.164353  | -1.172522 | C | 3.905646  | 0.648161  | 2.296829  |
| C | 1.540178  | 1.027443  | -0.096029 | H | 3.207435  | 1.388182  | 1.894404  |
| C | 0.344454  | 4.218755  | -1.644669 | C | 5.138883  | 1.427502  | 2.795829  |
| C | 2.545816  | 3.149486  | -1.587718 | H | 5.623291  | 1.969910  | 1.976032  |
| C | 2.905826  | 0.985984  | -0.494944 | H | 5.885573  | 0.758056  | 3.239181  |
| C | 0.850942  | 5.217896  | -2.446829 | H | 4.848046  | 2.156447  | 3.562210  |
| H | -0.705874 | 4.225619  | -1.378459 | C | 3.188478  | -0.061497 | 3.461584  |
| C | 3.041729  | 4.206504  | -2.398590 | H | 2.291564  | -0.580719 | 3.110253  |
| C | 3.381624  | 2.070006  | -1.203720 | H | 2.886252  | 0.667799  | 4.223143  |
| C | 2.216121  | 5.223561  | -2.818358 | H | 3.839916  | -0.796755 | 3.948741  |
| H | 0.193227  | 6.006469  | -2.802079 | C | 3.741594  | -0.978121 | -2.603715 |
| H | 4.087736  | 4.184788  | -2.694513 | H | 2.942564  | -0.232242 | -2.650097 |
| H | 4.425547  | 2.086268  | -1.504876 | C | 4.885041  | -0.488653 | -3.516124 |
| H | 2.604087  | 6.021805  | -3.444971 | H | 5.282673  | 0.477854  | -3.185975 |
| C | 3.800339  | -0.167659 | -0.147177 | H | 4.532017  | -0.375648 | -4.548413 |
| C | 4.276177  | -0.320283 | 1.173316  | H | 5.717819  | -1.202609 | -3.523247 |
| C | 4.206734  | -1.082552 | -1.149804 | C | 3.147344  | -2.296259 | -3.135869 |
| C | 5.147253  | -1.377961 | 1.467001  | H | 2.313111  | -2.625710 | -2.511766 |
| C | 5.083268  | -2.113515 | -0.800197 | H | 3.896544  | -3.096081 | -3.176920 |
| C | 5.571355  | -2.291787 | 0.500037  | H | 2.773691  | -2.148449 | -4.156677 |
| H | 5.502433  | -1.474670 | 2.486826  | C | -3.928422 | -0.684400 | 2.700677  |
| H | 5.391455  | -2.805977 | -1.577860 | H | -3.148794 | 0.081164  | 2.736553  |
| C | -3.806062 | -0.134015 | 0.171974  | C | -3.364669 | -1.924821 | 3.419697  |
| C | -4.210513 | -0.420418 | -1.155986 | H | -3.093891 | -1.668848 | 4.450925  |
| C | -4.274933 | -0.945274 | 1.232120  | H | -2.463433 | -2.292059 | 2.921063  |
| C | -5.051652 | -1.510717 | -1.387976 | H | -4.091668 | -2.743712 | 3.465854  |
| C | -5.123015 | -2.023615 | 0.938104  | C | -5.151944 | -0.137242 | 3.465435  |
| C | -5.525165 | -2.337477 | -0.361179 | H | -5.967330 | -0.870479 | 3.483314  |
| H | -5.354096 | -1.714552 | -2.411266 | H | -5.542231 | 0.776187  | 3.003076  |
| H | -5.476444 | -2.629392 | 1.764360  | H | -4.886033 | 0.094731  | 4.503952  |
| O | 1.060201  | -0.060144 | 0.644821  | C | -3.811420 | 0.455986  | -2.343961 |
| O | -1.099156 | -0.054235 | -0.686896 | H | -3.110447 | 1.216458  | -1.988928 |



|   |           |           |           |   |           |           |           |
|---|-----------|-----------|-----------|---|-----------|-----------|-----------|
| C | -3.773746 | 0.907107  | 0.447398  | H | -4.212180 | 0.686421  | 4.888839  |
| C | -4.330086 | 0.751143  | -0.845072 | H | -5.445679 | -0.161568 | 3.940416  |
| C | -4.092811 | -0.012407 | 1.476679  | C | -2.883300 | -1.204411 | 3.385958  |
| C | -5.195858 | -0.321695 | -1.083329 | H | -2.085388 | -1.516811 | 2.707772  |
| C | -4.969149 | -1.065513 | 1.186624  | H | -3.611983 | -2.018977 | 3.473647  |
| C | -5.526433 | -1.239870 | -0.082511 | H | -2.447024 | -1.049487 | 4.380408  |
| H | -5.628496 | -0.451030 | -2.071653 | C | 3.696792  | 0.447776  | -2.920332 |
| H | -5.224019 | -1.776893 | 1.966773  | H | 2.883871  | 1.178546  | -2.890554 |
| C | 3.782923  | 1.018952  | -0.393286 | C | 3.139012  | -0.812626 | -3.608016 |
| C | 4.292652  | 0.757338  | 0.902258  | H | 2.763452  | -0.557194 | -4.605748 |
| C | 4.164707  | 0.197091  | -1.484515 | H | 2.307706  | -1.238811 | -3.039802 |
| C | 5.155043  | -0.329029 | 1.084944  | H | 3.901880  | -1.588974 | -3.734997 |
| C | 5.033608  | -0.875205 | -1.246785 | C | 4.835802  | 1.049889  | -3.770270 |
| C | 5.532388  | -1.161418 | 0.027347  | H | 5.674992  | 0.349224  | -3.857138 |
| H | 5.552197  | -0.534338 | 2.075022  | H | 5.223618  | 1.975928  | -3.332038 |
| H | 5.332385  | -1.513064 | -2.073605 | H | 4.481768  | 1.277026  | -4.783131 |
| O | -1.107552 | 1.059878  | -0.549826 | C | 3.983238  | 1.648260  | 2.105465  |
| O | 1.136376  | 1.062401  | 0.632798  | H | 3.254826  | 2.402486  | 1.795352  |
| P | -0.006413 | 0.055597  | 0.078416  | C | 3.353607  | 0.863903  | 3.272154  |
| O | -0.401165 | -0.924604 | 1.105455  | H | 4.042723  | 0.112850  | 3.675919  |
| C | -4.048517 | 1.727768  | -1.986787 | H | 2.439113  | 0.353720  | 2.955421  |
| H | -3.334456 | 2.475531  | -1.629657 | H | 3.097260  | 1.547526  | 4.090376  |
| C | -5.324555 | 2.490438  | -2.396595 | C | 5.245091  | 2.408230  | 2.563131  |
| H | -5.755073 | 3.029718  | -1.545087 | H | 5.664419  | 3.009195  | 1.748185  |
| H | -6.092272 | 1.810281  | -2.783735 | H | 6.025935  | 1.718884  | 2.905168  |
| H | -5.098410 | 3.220743  | -3.182966 | H | 5.005494  | 3.081736  | 3.394799  |
| C | -3.404740 | 1.030253  | -3.200416 | O | 0.531318  | -0.567439 | -1.305831 |
| H | -2.478454 | 0.522488  | -2.914762 | C | 6.442878  | -2.328188 | 0.250752  |
| H | -3.166144 | 1.766113  | -3.977959 | C | 7.793734  | -2.262751 | -0.166877 |
| H | -4.078561 | 0.287884  | -3.643876 | C | 5.946624  | -3.497898 | 0.875572  |
| C | -3.536662 | 0.102616  | 2.896924  | C | 8.662248  | -3.400282 | 0.039684  |
| H | -2.752007 | 0.864830  | 2.892236  | C | 6.826630  | -4.626545 | 1.082021  |
| C | -4.629094 | 0.568172  | 3.881397  | C | 8.156227  | -4.548072 | 0.656952  |
| H | -5.065166 | 1.527750  | 3.580517  | H | 8.813785  | -5.401363 | 0.811193  |

|   |            |           |           |                                                   |            |           |           |
|---|------------|-----------|-----------|---------------------------------------------------|------------|-----------|-----------|
| C | -6.448050  | -2.385310 | -0.366904 | H                                                 | 3.908912   | -2.793394 | 1.154466  |
| C | -7.847945  | -2.181594 | -0.377662 | C                                                 | 6.313903   | -5.803543 | 1.712996  |
| C | -5.913202  | -3.669225 | -0.627440 | H                                                 | 6.989882   | -6.642080 | 1.863605  |
| C | -8.730385  | -3.291599 | -0.660275 | C                                                 | -10.143876 | -3.071922 | -0.667473 |
| C | -6.805141  | -4.772502 | -0.906450 | H                                                 | -10.794571 | -3.916009 | -0.884297 |
| C | -8.186130  | -4.553762 | -0.916603 |                                                   |            |           |           |
| H | -8.853894  | -5.386554 | -1.128625 |                                                   |            |           |           |
| C | 5.007884   | -5.878237 | 2.116912  |                                                   |            |           |           |
| H | 4.631705   | -6.778342 | 2.595520  |                                                   |            |           |           |
| C | 4.133667   | -4.773112 | 1.907126  |                                                   |            |           |           |
| H | 3.097415   | -4.842620 | 2.226975  |                                                   |            |           |           |
| C | 9.670604   | -1.061966 | -1.172433 |                                                   |            |           |           |
| H | 10.073867  | -0.163872 | -1.632856 |                                                   |            |           |           |
| C | 10.517980  | -2.190958 | -0.979847 |                                                   |            |           |           |
| H | 11.555573  | -2.145728 | -1.299494 |                                                   |            |           |           |
| C | -4.897688  | -6.268746 | -1.164321 |                                                   |            |           |           |
| H | -4.490667  | -7.256041 | -1.365742 |                                                   |            |           |           |
| C | -4.014653  | -5.183407 | -0.895592 |                                                   |            |           |           |
| H | -2.941564  | -5.355244 | -0.895836 |                                                   |            |           |           |
| C | -8.443630  | -0.907155 | -0.104657 |                                                   |            |           |           |
| C | -9.804077  | -0.739537 | -0.119273 |                                                   |            |           |           |
| C | -10.669113 | -1.834668 | -0.406619 |                                                   |            |           |           |
| H | -7.795166  | -0.067039 | 0.118727  |                                                   |            |           |           |
| H | -10.231236 | 0.237170  | 0.092411  |                                                   |            |           |           |
| H | -11.745081 | -1.682436 | -0.414503 |                                                   |            |           |           |
| C | -6.251596  | -6.064980 | -1.169762 |                                                   |            |           |           |
| H | -6.935308  | -6.885244 | -1.376158 |                                                   |            |           |           |
| C | -4.503863  | -3.929063 | -0.637751 |                                                   |            |           |           |
| H | -3.820810  | -3.111575 | -0.434400 |                                                   |            |           |           |
| C | 10.024851  | -3.323167 | -0.388815 |                                                   |            |           |           |
| H | 10.663305  | -4.189229 | -0.230436 |                                                   |            |           |           |
| C | 8.357733   | -1.096260 | -0.779396 |                                                   |            |           |           |
| H | 7.725407   | -0.227595 | -0.925904 |                                                   |            |           |           |
| C | 4.585944   | -3.626590 | 1.306873  |                                                   |            |           |           |
|   |            |           |           |                                                   |            |           |           |
|   |            |           |           | <b>TS1-R-cyclohexyl-anthryl E= -4612.13924318</b> |            |           |           |
|   |            |           |           | H                                                 | 0.240162   | -1.896573 | -1.463692 |
|   |            |           |           | C                                                 | 0.225967   | 1.820704  | 3.613827  |
|   |            |           |           | C                                                 | 0.827718   | 0.677431  | 4.150783  |
|   |            |           |           | C                                                 | 1.537100   | 0.728582  | 5.361281  |
|   |            |           |           | C                                                 | 1.609722   | 1.946680  | 6.037548  |
|   |            |           |           | C                                                 | 1.005227   | 3.094059  | 5.517693  |
|   |            |           |           | C                                                 | 0.319848   | 3.029558  | 4.302396  |
|   |            |           |           | H                                                 | -0.291983  | 1.752817  | 2.663616  |
|   |            |           |           | H                                                 | 2.152325   | 1.996124  | 6.978921  |
|   |            |           |           | H                                                 | 1.073551   | 4.034044  | 6.057879  |
|   |            |           |           | H                                                 | -0.142776  | 3.918863  | 3.884558  |
|   |            |           |           | C                                                 | 2.217184   | -0.534000 | 5.831768  |
|   |            |           |           | H                                                 | 3.220569   | -0.602711 | 5.385572  |
|   |            |           |           | H                                                 | 2.357294   | -0.521965 | 6.918123  |
|   |            |           |           | C                                                 | 1.395927   | -1.763877 | 5.422610  |
|   |            |           |           | H                                                 | 1.917247   | -2.695385 | 5.648274  |
|   |            |           |           | H                                                 | 0.448599   | -1.778810 | 5.983048  |
|   |            |           |           | C                                                 | 1.027388   | -1.745807 | 3.950235  |
|   |            |           |           | N                                                 | 0.748482   | -0.546860 | 3.434622  |
|   |            |           |           | H                                                 | 0.395583   | -0.475067 | 2.463390  |
|   |            |           |           | C                                                 | 1.158365   | -3.196921 | -0.237975 |
|   |            |           |           | C                                                 | -0.118467  | -3.177379 | 0.477010  |
|   |            |           |           | H                                                 | 1.847305   | -2.378512 | -0.033500 |
|   |            |           |           | H                                                 | -0.473515  | -2.187305 | 0.750908  |
|   |            |           |           | C                                                 | 1.587084   | 2.558291  | -0.827249 |
|   |            |           |           | C                                                 | 0.736368   | 3.647641  | -0.957555 |
|   |            |           |           | C                                                 | 1.101823   | 4.696206  | -1.874112 |

|   |           |           |           |   |           |           |           |
|---|-----------|-----------|-----------|---|-----------|-----------|-----------|
| C | 2.387533  | 4.646766  | -2.503920 | H | -5.565079 | -0.850462 | 1.391836  |
| C | 3.247334  | 3.548684  | -2.246366 | C | 3.798732  | 1.330434  | -1.224408 |
| C | 2.867303  | 2.487258  | -1.452101 | C | 4.581422  | 1.289095  | -0.047379 |
| H | -0.759954 | 5.806617  | -1.786391 | C | 3.935141  | 0.317558  | -2.205446 |
| C | 0.233941  | 5.770824  | -2.216464 | C | 5.488608  | 0.237704  | 0.129135  |
| C | 2.772992  | 5.687085  | -3.392243 | C | 4.856719  | -0.712490 | -1.981912 |
| H | 4.231203  | 3.539839  | -2.707719 | C | 5.639991  | -0.772388 | -0.824404 |
| C | 1.917369  | 6.724707  | -3.681904 | H | 6.100794  | 0.203150  | 1.026296  |
| C | 0.630252  | 6.755057  | -3.095640 | H | 4.973876  | -1.495003 | -2.725406 |
| H | 3.757516  | 5.637423  | -3.851471 | O | -1.110266 | 1.530567  | -1.020506 |
| H | 2.219988  | 7.510719  | -4.368262 | O | 1.226597  | 1.522723  | 0.019328  |
| H | -0.056128 | 7.559729  | -3.345189 | P | -0.001153 | 0.496369  | -0.376790 |
| C | -0.545338 | 3.700401  | -0.193544 | O | -0.458412 | -0.095487 | 0.933769  |
| C | -0.878491 | 4.811061  | 0.658425  | C | -3.937695 | 2.501274  | -2.531865 |
| C | -1.461353 | 2.662491  | -0.304593 | H | -3.183280 | 3.195883  | -2.152626 |
| C | 0.053198  | 5.830442  | 1.000877  | C | -5.134289 | 3.355427  | -2.996659 |
| C | -2.192874 | 4.881150  | 1.225216  | H | -5.560925 | 3.927454  | -2.164829 |
| C | -2.790788 | 2.733897  | 0.210098  | H | -5.933421 | 2.735614  | -3.420160 |
| C | -0.302371 | 6.869460  | 1.833736  | H | -4.818217 | 4.064973  | -3.770945 |
| H | 1.061711  | 5.776642  | 0.607335  | C | -3.301535 | 1.743137  | -3.713058 |
| C | -2.533269 | 5.975727  | 2.065922  | H | -2.425772 | 1.174846  | -3.385915 |
| C | -3.129653 | 3.853919  | 0.940503  | H | -2.981137 | 2.449961  | -4.488049 |
| C | -1.611262 | 6.952651  | 2.365615  | H | -4.011689 | 1.046552  | -4.174745 |
| H | 0.431031  | 7.630265  | 2.086993  | C | -3.748350 | 0.872310  | 2.372783  |
| H | -3.538350 | 6.018813  | 2.478889  | H | -2.902562 | 1.564648  | 2.395288  |
| H | -4.140920 | 3.950032  | 1.327048  | C | -4.835157 | 1.437480  | 3.310039  |
| H | -1.881287 | 7.780952  | 3.014890  | H | -5.178129 | 2.425273  | 2.981883  |
| C | -3.801179 | 1.664265  | -0.088181 | H | -4.448517 | 1.535312  | 4.331772  |
| C | -4.337086 | 1.559642  | -1.395548 | H | -5.710905 | 0.778008  | 3.345162  |
| C | -4.252925 | 0.791943  | 0.931744  | C | -3.230330 | -0.479947 | 2.895786  |
| C | -5.300262 | 0.580062  | -1.657188 | H | -2.440172 | -0.861506 | 2.244218  |
| C | -5.216810 | -0.174041 | 0.616635  | H | -4.027946 | -1.229252 | 2.961633  |
| C | -5.750131 | -0.302152 | -0.669897 | H | -2.814300 | -0.356320 | 3.903247  |
| H | -5.721517 | 0.501404  | -2.655574 | C | 3.142524  | 0.335927  | -3.513733 |

|   |           |           |           |   |            |           |           |
|---|-----------|-----------|-----------|---|------------|-----------|-----------|
| H | 2.270128  | 0.979174  | -3.365598 | H | -4.425426  | -4.809434 | -0.226406 |
| C | 2.609477  | -1.047797 | -3.926697 | H | -3.664968  | -5.181136 | 1.320486  |
| H | 1.953617  | -0.942724 | -4.798854 | H | -1.228930  | -7.723755 | -0.166246 |
| H | 2.027073  | -1.502871 | -3.122939 | H | -1.701215  | -6.971977 | 1.353581  |
| H | 3.415921  | -1.734764 | -4.210080 | H | -3.693775  | -7.217713 | -0.100818 |
| C | 3.987946  | 0.934486  | -4.658008 | H | -2.890232  | -6.351524 | -1.406846 |
| H | 4.885123  | 0.329187  | -4.837973 | C | -6.769109  | -1.352031 | -0.979495 |
| H | 4.313785  | 1.955293  | -4.433721 | C | -6.437985  | -2.427491 | -1.842098 |
| H | 3.408641  | 0.962717  | -5.588973 | C | -8.064205  | -1.274624 | -0.408876 |
| C | 4.501841  | 2.374219  | 1.025786  | C | -5.143770  | -2.570089 | -2.442959 |
| H | 3.691026  | 3.057690  | 0.758464  | C | -7.424714  | -3.445022 | -2.129728 |
| C | 4.162836  | 1.795777  | 2.411835  | C | -9.035650  | -2.307670 | -0.692153 |
| H | 4.952197  | 1.128097  | 2.777767  | C | -8.476974  | -0.188462 | 0.430705  |
| H | 3.226090  | 1.231568  | 2.378256  | C | -4.856966  | -3.616992 | -3.281909 |
| H | 4.044828  | 2.602982  | 3.144309  | H | -4.382312  | -1.829502 | -2.227065 |
| C | 5.798720  | 3.206386  | 1.071549  | C | -7.082803  | -4.521652 | -3.007763 |
| H | 6.008939  | 3.665817  | 0.099107  | C | -8.690569  | -3.361839 | -1.542599 |
| H | 6.662248  | 2.586639  | 1.341180  | C | -10.336712 | -2.223560 | -0.103232 |
| H | 5.715570  | 4.007729  | 1.815890  | H | -7.773555  | 0.611514  | 0.631584  |
| O | 0.388614  | -0.418293 | -1.515208 | C | -9.736407  | -0.141635 | 0.970344  |
| S | 0.933173  | -3.198396 | 3.089206  | C | -5.839049  | -4.606808 | -3.573737 |
| O | 0.265973  | -2.932133 | -1.344638 | H | -3.869709  | -3.693803 | -3.729784 |
| H | 1.665609  | -4.150553 | -0.365233 | H | -7.839775  | -5.274108 | -3.216783 |
| C | -1.068686 | -4.328955 | 0.602206  | H | -9.426956  | -4.133850 | -1.757238 |
| C | -2.452482 | -3.959209 | 0.007423  | C | -10.680032 | -1.175879 | 0.708216  |
| C | -0.560838 | -5.673360 | 0.052068  | H | -11.051461 | -3.013721 | -0.321549 |
| H | -1.214207 | -4.434531 | 1.688583  | H | -10.022952 | 0.695961  | 1.600798  |
| C | -3.472909 | -5.081830 | 0.241747  | H | -5.594521  | -5.427862 | -4.242278 |
| H | -2.334114 | -3.783797 | -1.068784 | H | -11.672638 | -1.123484 | 1.147396  |
| H | -2.809080 | -3.018904 | 0.445418  | C | 6.613301   | -1.890851 | -0.617653 |
| C | -1.596800 | -6.788624 | 0.273927  | C | 7.833577   | -1.907334 | -1.335279 |
| H | -0.360758 | -5.566938 | -1.022760 | C | 6.308699   | -2.934908 | 0.288862  |
| H | 0.386800  | -5.947637 | 0.532926  | C | 8.207913   | -0.864359 | -2.244114 |
| C | -2.968710 | -6.421800 | -0.312117 | C | 8.761814   | -2.999834 | -1.146317 |

|                                               |           |           |           |   |           |           |           |
|-----------------------------------------------|-----------|-----------|-----------|---|-----------|-----------|-----------|
| C                                             | 7.245551  | -4.021374 | 0.470949  | C | -0.891627 | 3.384484  | 4.726903  |
| C                                             | 5.087497  | -2.976959 | 1.038234  | H | -1.950079 | 3.096445  | 4.817055  |
| C                                             | 9.397852  | -0.904366 | -2.923587 | H | -0.830642 | 4.457133  | 4.916396  |
| H                                             | 7.529960  | -0.030181 | -2.386495 | C | -0.483893 | 3.109975  | 3.290616  |
| C                                             | 9.991009  | -3.004029 | -1.878081 | N | -0.152473 | 1.845854  | 3.015166  |
| C                                             | 8.442605  | -4.025401 | -0.251293 | H | 0.072881  | 1.573744  | 2.042086  |
| C                                             | 6.922550  | -5.073323 | 1.385261  | C | -0.984272 | 3.786309  | -1.074189 |
| H                                             | 4.374159  | -2.168973 | 0.916524  | C | 0.346732  | 3.814093  | -0.467759 |
| C                                             | 4.814496  | -4.003450 | 1.905831  | H | -1.689336 | 3.053613  | -0.683187 |
| C                                             | 10.302808 | -1.989854 | -2.743420 | H | 0.682394  | 2.865456  | -0.056683 |
| H                                             | 9.658394  | -0.099269 | -3.605577 | C | -1.856183 | -1.782635 | -0.601700 |
| H                                             | 10.676176 | -3.835155 | -1.727414 | C | -1.165061 | -2.986346 | -0.580122 |
| H                                             | 9.143465  | -4.846314 | -0.112339 | C | -1.739473 | -4.115616 | -1.264244 |
| C                                             | 5.744923  | -5.068125 | 2.083683  | C | -3.057359 | -3.994084 | -1.812841 |
| H                                             | 7.638967  | -5.881843 | 1.512167  | C | -3.741514 | -2.755594 | -1.715974 |
| H                                             | 3.881261  | -4.004074 | 2.463299  | C | -3.161085 | -1.635498 | -1.158586 |
| H                                             | 11.240708 | -2.005285 | -3.292112 | H | -0.034777 | -5.445724 | -1.090596 |
| H                                             | 5.513448  | -5.874086 | 2.775062  | C | -1.049396 | -5.345037 | -1.457135 |
|                                               |           |           |           | C | -3.648606 | -5.107663 | -2.468870 |
|                                               |           |           |           | H | -4.748123 | -2.684949 | -2.118984 |
|                                               |           |           |           | C | -2.961498 | -6.290432 | -2.615597 |
|                                               |           |           |           | C | -1.643004 | -6.400530 | -2.114759 |
|                                               |           |           |           | H | -4.654366 | -4.998896 | -2.867893 |
|                                               |           |           |           | H | -3.420528 | -7.132703 | -3.125930 |
|                                               |           |           |           | H | -1.089333 | -7.325047 | -2.255031 |
|                                               |           |           |           | C | 0.161804  | -3.081652 | 0.098801  |
|                                               |           |           |           | C | 0.427108  | -4.066717 | 1.114183  |
|                                               |           |           |           | C | 1.185571  | -2.208645 | -0.248472 |
|                                               |           |           |           | C | -0.589816 | -4.876862 | 1.692900  |
|                                               |           |           |           | C | 1.766192  | -4.216107 | 1.602081  |
|                                               |           |           |           | C | 2.533256  | -2.362585 | 0.195383  |
|                                               |           |           |           | C | -0.293964 | -5.798281 | 2.674597  |
|                                               |           |           |           | H | -1.614360 | -4.754249 | 1.360920  |
|                                               |           |           |           | C | 2.041266  | -5.190421 | 2.599754  |
| <b>TS1-R-cyclohexyl-iPr E= -3771.45761032</b> |           |           |           |   |           |           |           |
| H                                             | -0.209598 | 2.250849  | -2.122062 |   |           |           |           |
| C                                             | -0.070755 | -0.528988 | 3.537416  |   |           |           |           |
| C                                             | -0.101153 | 0.799693  | 3.975015  |   |           |           |           |
| C                                             | -0.057508 | 1.115706  | 5.342628  |   |           |           |           |
| C                                             | 0.004185  | 0.071028  | 6.265319  |   |           |           |           |
| C                                             | 0.032253  | -1.259992 | 5.842268  |   |           |           |           |
| C                                             | -0.002550 | -1.556676 | 4.477795  |   |           |           |           |
| H                                             | -0.106908 | -0.744586 | 2.475579  |   |           |           |           |
| H                                             | 0.033066  | 0.305940  | 7.326992  |   |           |           |           |
| H                                             | 0.079612  | -2.060520 | 6.575033  |   |           |           |           |
| H                                             | 0.017143  | -2.588206 | 4.138501  |   |           |           |           |
| C                                             | -0.053342 | 2.575577  | 5.726236  |   |           |           |           |
| H                                             | -0.442693 | 2.713977  | 6.740781  |   |           |           |           |
| H                                             | 0.977968  | 2.959523  | 5.729828  |   |           |           |           |



|   |           |           |           |   |           |           |           |
|---|-----------|-----------|-----------|---|-----------|-----------|-----------|
| C | 2.792506  | -3.382323 | 1.087608  | H | 2.377992  | -2.707059 | -4.520684 |
| C | 1.036098  | -5.968685 | 3.127164  | H | 3.630773  | -1.458957 | -4.474580 |
| H | -1.090766 | -6.397924 | 3.106430  | C | 6.949884  | 0.925246  | -1.802737 |
| H | 3.065259  | -5.298192 | 2.949607  | H | 7.290298  | 1.546068  | -0.962327 |
| H | 3.812300  | -3.541666 | 1.427874  | C | 8.144220  | 0.060801  | -2.249384 |
| H | 1.257718  | -6.704882 | 3.894980  | H | 8.984533  | 0.692452  | -2.562372 |
| C | 3.637885  | -1.488072 | -0.322535 | H | 7.876390  | -0.580820 | -3.097212 |
| C | 4.074940  | -1.628305 | -1.663922 | H | 8.488351  | -0.588052 | -1.436468 |
| C | 4.281265  | -0.561289 | 0.531052  | C | 6.507356  | 1.878194  | -2.929717 |
| C | 5.136920  | -0.840709 | -2.117200 | H | 5.685663  | 2.524529  | -2.600762 |
| C | 5.347160  | 0.194722  | 0.024601  | H | 6.159944  | 1.321447  | -3.808085 |
| C | 5.791806  | 0.077646  | -1.291801 | H | 7.340312  | 2.517376  | -3.247434 |
| H | 5.466835  | -0.955976 | -3.146764 | C | 3.867755  | -0.346236 | 1.987203  |
| H | 5.847137  | 0.903702  | 0.680641  | H | 2.942141  | -0.900552 | 2.163829  |
| C | -3.896643 | -0.326265 | -1.125857 | C | 4.930550  | -0.893415 | 2.961300  |
| C | -4.505686 | 0.110240  | 0.075240  | H | 5.121871  | -1.959361 | 2.793634  |
| C | -4.028457 | 0.446352  | -2.304594 | H | 4.601191  | -0.767569 | 3.999996  |
| C | -5.233445 | 1.304568  | 0.074260  | H | 5.884779  | -0.364973 | 2.845577  |
| C | -4.770225 | 1.633961  | -2.248106 | C | 3.562627  | 1.132525  | 2.292018  |
| C | -5.380174 | 2.084649  | -1.076454 | H | 4.455829  | 1.762668  | 2.204991  |
| H | -5.707029 | 1.629060  | 0.997627  | H | 3.188295  | 1.234147  | 3.318108  |
| H | -4.880904 | 2.229304  | -3.151307 | H | 2.798571  | 1.511411  | 1.608021  |
| O | 0.920430  | -1.181676 | -1.138342 | C | -3.424417 | 0.016418  | -3.642796 |
| O | -1.296091 | -0.679285 | 0.021694  | H | -2.681460 | -0.760219 | -3.440527 |
| P | 0.001903  | 0.090401  | -0.645056 | C | -2.690937 | 1.156555  | -4.372848 |
| O | 0.625661  | 0.860975  | 0.490734  | H | -3.380322 | 1.937957  | -4.714809 |
| C | 3.459562  | -2.639982 | -2.631078 | H | -2.184784 | 0.760500  | -5.261257 |
| H | 2.639223  | -3.150357 | -2.119345 | H | -1.935131 | 1.612599  | -3.730326 |
| C | 4.479617  | -3.727455 | -3.024827 | C | -4.504819 | -0.589289 | -4.563554 |
| H | 4.008835  | -4.478014 | -3.671613 | H | -4.062129 | -0.918501 | -5.511640 |
| H | 4.874784  | -4.240096 | -2.140398 | H | -5.281379 | 0.150720  | -4.793613 |
| H | 5.330244  | -3.303507 | -3.571744 | H | -4.996293 | -1.452528 | -4.102772 |
| C | 2.859823  | -1.960729 | -3.877288 | C | -6.189270 | 3.375488  | -1.067984 |
| H | 2.108320  | -1.218383 | -3.593144 | H | -6.121675 | 3.804224  | -2.077437 |

|   |           |           |           |                                              |           |           |           |
|---|-----------|-----------|-----------|----------------------------------------------|-----------|-----------|-----------|
| C | -7.679994 | 3.112414  | -0.779275 | H                                            | 4.057254  | 5.706534  | -0.357580 |
| H | -7.821594 | 2.691264  | 0.223288  | H                                            | 1.551110  | 8.159981  | -1.871541 |
| H | -8.103332 | 2.404850  | -1.500576 | H                                            | 2.187014  | 7.592081  | -0.331736 |
| H | -8.256402 | 4.043979  | -0.834496 | H                                            | 3.979677  | 7.525494  | -2.045179 |
| C | -5.614811 | 4.414210  | -0.086334 | H                                            | 2.973796  | 6.540339  | -3.104487 |
| H | -4.563655 | 4.631020  | -0.307316 |                                              |           |           |           |
| H | -5.668847 | 4.057763  | 0.949091  | <b>TS1-R-cyclohexyl-Ph E= -3997.67380844</b> |           |           |           |
| H | -6.176559 | 5.354462  | -0.144074 | H                                            | -0.090710 | -2.136185 | -1.890769 |
| C | -4.437094 | -0.707186 | 1.364618  | C                                            | 0.455361  | 0.847745  | 3.598948  |
| H | -3.743905 | -1.537813 | 1.204992  | C                                            | 0.791265  | -0.452389 | 3.992682  |
| C | -3.891510 | 0.109392  | 2.550132  | C                                            | 1.456663  | -0.696283 | 5.204778  |
| H | -3.777318 | -0.530714 | 3.433053  | C                                            | 1.758615  | 0.389110  | 6.027698  |
| H | -4.563498 | 0.932018  | 2.823202  | C                                            | 1.421824  | 1.691810  | 5.650867  |
| H | -2.912112 | 0.534701  | 2.311162  | C                                            | 0.775911  | 1.918066  | 4.433155  |
| C | -5.809143 | -1.325353 | 1.700663  | H                                            | -0.036778 | 1.005600  | 2.645700  |
| H | -6.170817 | -1.954780 | 0.879785  | H                                            | 2.269324  | 0.210062  | 6.971196  |
| H | -6.562542 | -0.549392 | 1.882808  | H                                            | 1.665876  | 2.524839  | 6.303975  |
| H | -5.742439 | -1.946599 | 2.602362  | H                                            | 0.519936  | 2.927954  | 4.125785  |
| O | -0.379362 | 0.809072  | -1.919765 | C                                            | 1.842159  | -2.121461 | 5.518466  |
| S | -0.514894 | 4.359895  | 2.154109  | H                                            | 2.819862  | -2.348363 | 5.067331  |
| O | -0.195453 | 3.297294  | -2.182173 | H                                            | 1.953153  | -2.268772 | 6.598286  |
| H | -1.455540 | 4.734857  | -1.322711 | C                                            | 0.791106  | -3.090791 | 4.960974  |
| C | 1.354404  | 4.913852  | -0.617584 | H                                            | 1.096181  | -4.132227 | 5.074334  |
| C | 2.634561  | 4.386214  | -1.318011 | H                                            | -0.153417 | -2.968161 | 5.512758  |
| C | 0.836448  | 6.198309  | -1.288201 | C                                            | 0.478701  | -2.822497 | 3.499654  |
| H | 1.639627  | 5.155732  | 0.417492  | N                                            | 0.482479  | -1.538355 | 3.131475  |
| C | 3.719165  | 5.471770  | -1.377650 | H                                            | 0.183104  | -1.279152 | 2.174940  |
| H | 2.367142  | 4.066985  | -2.332570 | C                                            | 0.467249  | -3.745398 | -0.813508 |
| H | 3.007618  | 3.498640  | -0.792387 | C                                            | -0.815477 | -3.524064 | -0.146922 |
| C | 1.934700  | 7.272413  | -1.353470 | H                                            | 1.304219  | -3.131540 | -0.483308 |
| H | 0.498043  | 5.959864  | -2.305884 | H                                            | -0.961139 | -2.520218 | 0.243843  |
| H | -0.030794 | 6.588552  | -0.740416 | C                                            | 1.888872  | 1.976468  | -0.758289 |
| C | 3.201335  | 6.752241  | -2.049569 | C                                            | 1.196415  | 3.179726  | -0.788080 |
| H | 4.594012  | 5.085107  | -1.915385 | C                                            | 1.718703  | 4.248899  | -1.599044 |

|   |           |           |           |   |           |           |           |
|---|-----------|-----------|-----------|---|-----------|-----------|-----------|
| C | 2.997896  | 4.083248  | -2.222219 | H | -5.627784 | -0.636204 | 1.302488  |
| C | 3.694716  | 2.857863  | -2.067104 | C | 3.912773  | 0.494003  | -1.275713 |
| C | 3.157807  | 1.787866  | -1.382124 | C | 4.628704  | 0.196425  | -0.092407 |
| H | 0.021070  | 5.588259  | -1.423376 | C | 3.959127  | -0.398627 | -2.374539 |
| C | 1.010045  | 5.457912  | -1.846436 | C | 5.381118  | -0.980075 | -0.031277 |
| C | 3.537669  | 5.138862  | -3.005962 | C | 4.728190  | -1.561961 | -2.263557 |
| H | 4.675445  | 2.756144  | -2.524099 | C | 5.447780  | -1.876152 | -1.104411 |
| C | 2.835327  | 6.305116  | -3.203781 | H | 5.961331  | -1.190283 | 0.862693  |
| C | 1.552252  | 6.455550  | -2.627181 | H | 4.750747  | -2.260332 | -3.094468 |
| H | 4.515376  | 4.998064  | -3.460777 | O | -0.913071 | 1.347440  | -1.065564 |
| H | 3.254465  | 7.102419  | -3.811355 | O | 1.375936  | 0.923933  | -0.017420 |
| H | 0.984849  | 7.364919  | -2.806192 | P | 0.035672  | 0.113675  | -0.527738 |
| C | -0.082179 | 3.334633  | -0.032263 | O | -0.528987 | -0.545136 | 0.706456  |
| C | -0.283435 | 4.399949  | 0.913502  | C | -3.560109 | 2.624001  | -2.485594 |
| C | -1.123315 | 2.439169  | -0.241184 | H | -2.710481 | 3.183632  | -2.085907 |
| C | 0.766689  | 5.253205  | 1.353812  | C | -4.628015 | 3.661875  | -2.886595 |
| C | -1.588420 | 4.594064  | 1.472433  | H | -4.952844 | 4.251620  | -2.021786 |
| C | -2.437188 | 2.627363  | 0.283792  | H | -5.516008 | 3.181055  | -3.313955 |
| C | 0.532124  | 6.257238  | 2.268497  | H | -4.227751 | 4.352634  | -3.638734 |
| H | 1.767922  | 5.098589  | 0.968435  | C | -3.049903 | 1.844442  | -3.712483 |
| C | -1.801514 | 5.652138  | 2.397664  | H | -2.268763 | 1.134207  | -3.426094 |
| C | -2.642480 | 3.719897  | 1.101321  | H | -2.628988 | 2.535975  | -4.452371 |
| C | -0.766576 | 6.470495  | 2.788870  | H | -3.857956 | 1.288818  | -4.203705 |
| H | 1.353399  | 6.889685  | 2.594727  | C | -3.637110 | 0.808445  | 2.358644  |
| H | -2.801083 | 5.793257  | 2.802097  | H | -2.715844 | 1.393740  | 2.418293  |
| H | -3.637526 | 3.908473  | 1.495655  | C | -4.657071 | 1.449458  | 3.321646  |
| H | -0.940166 | 7.271439  | 3.502279  | H | -4.879839 | 2.486069  | 3.044782  |
| C | -3.562389 | 1.700171  | -0.070558 | H | -4.270398 | 1.448185  | 4.348077  |
| C | -4.081866 | 1.695187  | -1.388989 | H | -5.604596 | 0.896916  | 3.320080  |
| C | -4.134739 | 0.856591  | 0.913442  | C | -3.286909 | -0.620639 | 2.813419  |
| C | -5.148079 | 0.845969  | -1.695802 | H | -2.552557 | -1.067226 | 2.138205  |
| C | -5.204139 | 0.028306  | 0.555043  | H | -4.170334 | -1.269404 | 2.849583  |
| C | -5.725792 | -0.001244 | -0.743120 | H | -2.857058 | -0.596886 | 3.822324  |
| H | -5.564488 | 0.866071  | -2.698803 | C | 3.222718  | -0.120960 | -3.686494 |

|   |           |           |           |                                               |           |           |           |
|---|-----------|-----------|-----------|-----------------------------------------------|-----------|-----------|-----------|
| H | 2.469672  | 0.647852  | -3.490774 | H                                             | -5.288912 | -4.110445 | -1.321936 |
| C | 2.472721  | -1.348852 | -4.234270 | H                                             | -4.776738 | -4.730233 | 0.243296  |
| H | 1.875953  | -1.057114 | -5.106643 | H                                             | -2.819026 | -7.664629 | -1.222729 |
| H | 1.793484  | -1.760229 | -3.485007 | H                                             | -3.259380 | -6.907563 | 0.304193  |
| H | 3.158147  | -2.139850 | -4.561774 | H                                             | -5.109116 | -6.626478 | -1.324359 |
| C | 4.192864  | 0.424815  | -4.755280 | H                                             | -4.012337 | -5.892968 | -2.491587 |
| H | 4.975005  | -0.309941 | -4.983555 | C                                             | -6.853991 | -0.900609 | -1.097861 |
| H | 4.687064  | 1.344425  | -4.425185 | C                                             | -6.899013 | -1.544512 | -2.347330 |
| H | 3.655755  | 0.645225  | -5.685885 | C                                             | -7.906325 | -1.135167 | -0.195885 |
| C | 4.657194  | 1.149449  | 1.101979  | C                                             | -7.955968 | -2.391559 | -2.681566 |
| H | 3.902174  | 1.923472  | 0.938110  | H                                             | -6.086516 | -1.393906 | -3.052748 |
| C | 4.296542  | 0.448400  | 2.423857  | C                                             | -8.962709 | -1.982589 | -0.528664 |
| H | 5.047019  | -0.299037 | 2.708390  | H                                             | -7.906774 | -0.627929 | 0.764934  |
| H | 3.326792  | -0.052300 | 2.347098  | C                                             | -8.992899 | -2.615359 | -1.773128 |
| H | 4.234907  | 1.179563  | 3.238251  | H                                             | -7.965658 | -2.882013 | -3.651627 |
| C | 6.020637  | 1.862219  | 1.204565  | H                                             | -9.768880 | -2.141727 | 0.182962  |
| H | 6.248592  | 2.414821  | 0.286174  | H                                             | -9.816517 | -3.274864 | -2.033077 |
| H | 6.832652  | 1.144418  | 1.372293  | C                                             | 6.258329  | -3.118457 | -1.016991 |
| H | 6.022555  | 2.573953  | 2.039347  | C                                             | 6.982864  | -3.589786 | -2.125704 |
| O | 0.325464  | -0.720816 | -1.754660 | C                                             | 6.324420  | -3.857124 | 0.177259  |
| S | 0.099750  | -4.107496 | 2.470385  | C                                             | 7.743848  | -4.755432 | -2.044100 |
| O | -0.282217 | -3.162599 | -1.904471 | H                                             | 6.967915  | -3.021514 | -3.051561 |
| H | 0.757618  | -4.767668 | -1.045696 | C                                             | 7.086595  | -5.021957 | 0.260705  |
| C | -1.999958 | -4.438648 | -0.192261 | H                                             | 5.752088  | -3.526130 | 1.039416  |
| C | -3.207697 | -3.734535 | -0.866634 | C                                             | 7.800106  | -5.477277 | -0.849968 |
| C | -1.746664 | -5.827938 | -0.803171 | H                                             | 8.301749  | -5.095214 | -2.913001 |
| H | -2.268320 | -4.571246 | 0.867281  | H                                             | 7.115759  | -5.579862 | 1.193253  |
| C | -4.464141 | -4.615258 | -0.805153 | H                                             | 8.393821  | -6.385219 | -0.785632 |
| H | -2.945943 | -3.526189 | -1.911277 |                                               |           |           |           |
| H | -3.395362 | -2.767121 | -0.385365 |                                               |           |           |           |
| C | -3.015187 | -6.695673 | -0.747175 | <b>TS1-R-cyclohexyl-tBu E= -3850.06666655</b> |           |           |           |
| H | -1.432008 | -5.709567 | -1.849410 | H                                             | -0.311866 | 2.217766  | -2.032938 |
| H | -0.928260 | -6.332031 | -0.273267 | C                                             | -0.042430 | -0.670456 | 3.580562  |
| C | -4.211668 | -6.001823 | -1.415265 | C                                             | -0.126286 | 0.648105  | 4.041360  |
|   |           |           |           | C                                             | -0.086235 | 0.942455  | 5.413894  |

|   |           |           |           |   |           |           |           |
|---|-----------|-----------|-----------|---|-----------|-----------|-----------|
| C | 0.026260  | -0.114257 | 6.317896  | H | -0.786008 | -7.379361 | -2.396603 |
| C | 0.108152  | -1.435447 | 5.871608  | C | 0.268311  | -3.144579 | 0.063550  |
| C | 0.076324  | -1.710109 | 4.502471  | C | 0.580718  | -4.138997 | 1.055731  |
| H | -0.076317 | -0.869193 | 2.515320  | C | 1.251084  | -2.220540 | -0.268860 |
| H | 0.052753  | 0.103450  | 7.383291  | C | -0.397751 | -5.004650 | 1.620019  |
| H | 0.194916  | -2.245561 | 6.590102  | C | 1.927303  | -4.240344 | 1.535219  |
| H | 0.138105  | -2.733901 | 4.145287  | C | 2.606887  | -2.327098 | 0.163550  |
| C | -0.140107 | 2.394473  | 5.823045  | C | -0.058093 | -5.932361 | 2.581381  |
| H | -0.530041 | 2.498878  | 6.841422  | H | -1.428037 | -4.919347 | 1.293924  |
| H | 0.874708  | 2.820096  | 5.829439  | C | 2.248504  | -5.222124 | 2.511597  |
| C | -1.015317 | 3.186345  | 4.841827  | C | 2.914343  | -3.353356 | 1.032931  |
| H | -2.061073 | 2.855082  | 4.932049  | C | 1.280027  | -6.053769 | 3.026114  |
| H | -0.995842 | 4.257132  | 5.049708  | H | -0.826143 | -6.575085 | 3.003219  |
| C | -0.605223 | 2.952694  | 3.399000  | H | 3.277679  | -5.292737 | 2.855666  |
| N | -0.227163 | 1.707246  | 3.100004  | H | 3.942153  | -3.476948 | 1.363931  |
| H | -0.001254 | 1.459759  | 2.120578  | H | 1.536483  | -6.795229 | 3.777861  |
| C | -1.120873 | 3.719954  | -0.962813 | C | 3.671447  | -1.399949 | -0.345215 |
| C | 0.204623  | 3.756648  | -0.344797 | C | 4.099447  | -1.491035 | -1.693421 |
| H | -1.816864 | 2.968762  | -0.591050 | C | 4.292815  | -0.470636 | 0.518460  |
| H | 0.552225  | 2.805011  | 0.049047  | C | 5.127979  | -0.656494 | -2.135298 |
| C | -1.809725 | -1.923695 | -0.599750 | C | 5.328714  | 0.335135  | 0.021694  |
| C | -1.063347 | -3.093914 | -0.610137 | C | 5.768822  | 0.268075  | -1.300924 |
| C | -1.585161 | -4.231067 | -1.322424 | H | 5.444797  | -0.741741 | -3.171026 |
| C | -2.907951 | -4.157065 | -1.867556 | H | 5.796581  | 1.035398  | 0.704158  |
| C | -3.650317 | -2.955888 | -1.735484 | C | -3.925790 | -0.558373 | -1.065532 |
| C | -3.123168 | -1.825091 | -1.147370 | C | -4.553936 | -0.199340 | 0.150723  |
| H | 0.180584  | -5.483263 | -1.183023 | C | -4.106188 | 0.252104  | -2.209227 |
| C | -0.838132 | -5.421214 | -1.546932 | C | -5.341826 | 0.953433  | 0.193845  |
| C | -3.446746 | -5.279490 | -2.553040 | C | -4.911034 | 1.397152  | -2.109256 |
| H | -4.661168 | -2.923618 | -2.132946 | C | -5.542092 | 1.775807  | -0.922097 |
| C | -2.704828 | -6.424346 | -2.730588 | H | -5.823443 | 1.210496  | 1.133362  |
| C | -1.382163 | -6.485739 | -2.232274 | H | -5.043231 | 2.002339  | -2.998233 |
| H | -4.456909 | -5.207767 | -2.949337 | O | 0.934635  | -1.185211 | -1.132078 |
| H | -3.124197 | -7.273525 | -3.263132 | O | -1.297826 | -0.811099 | 0.048525  |

|   |           |           |           |   |           |           |           |
|---|-----------|-----------|-----------|---|-----------|-----------|-----------|
| P | -0.036898 | 0.031340  | -0.600775 | H | -3.547126 | 1.868976  | -4.559782 |
| O | 0.560263  | 0.796364  | 0.553038  | H | -2.300144 | 0.774613  | -5.161067 |
| C | 3.510026  | -2.498481 | -2.681275 | H | -2.079392 | 1.575736  | -3.598528 |
| H | 2.715453  | -3.052609 | -2.174378 | C | -4.540412 | -0.719436 | -4.505155 |
| C | 4.563773  | -3.536414 | -3.117292 | H | -4.085588 | -0.993117 | -5.465115 |
| H | 4.111414  | -4.288102 | -3.775833 | H | -5.353484 | -0.011205 | -4.707693 |
| H | 4.991764  | -4.055362 | -2.252027 | H | -4.986973 | -1.621503 | -4.073785 |
| H | 5.389198  | -3.067334 | -3.666229 | C | -6.432743 | 3.027304  | -0.805886 |
| C | 2.869752  | -1.808091 | -3.900971 | C | -7.864427 | 2.604416  | -0.398040 |
| H | 2.095295  | -1.101992 | -3.587544 | H | -7.875547 | 2.074880  | 0.560390  |
| H | 2.407245  | -2.553656 | -4.559269 | H | -8.305572 | 1.941171  | -1.150959 |
| H | 3.614167  | -1.261948 | -4.493101 | H | -8.510768 | 3.485761  | -0.300308 |
| C | 6.903731  | 1.148367  | -1.856070 | C | -5.854958 | 3.975070  | 0.271888  |
| C | 8.048135  | 0.247287  | -2.378624 | H | -4.841757 | 4.299213  | 0.006930  |
| H | 8.863861  | 0.860001  | -2.782484 | H | -5.802356 | 3.493137  | 1.253446  |
| H | 7.708825  | -0.422637 | -3.175467 | H | -6.482281 | 4.869692  | 0.371424  |
| H | 8.456077  | -0.373225 | -1.572404 | C | -4.436691 | -1.054194 | 1.412172  |
| C | 6.362725  | 2.012171  | -3.020323 | H | -3.725082 | -1.860304 | 1.212293  |
| H | 5.553437  | 2.667676  | -2.677348 | C | -3.886391 | -0.256963 | 2.608793  |
| H | 5.967750  | 1.397008  | -3.835452 | H | -3.741431 | -0.916197 | 3.473019  |
| H | 7.160623  | 2.642415  | -3.432833 | H | -4.571051 | 0.543674  | 2.914450  |
| C | 3.887324  | -0.298729 | 1.982878  | H | -2.921467 | 0.195917  | 2.362045  |
| H | 2.991574  | -0.899846 | 2.160354  | C | -5.782600 | -1.721160 | 1.759551  |
| C | 4.985287  | -0.809899 | 2.937182  | H | -6.147183 | -2.332960 | 0.926693  |
| H | 5.222619  | -1.863645 | 2.751760  | H | -6.552779 | -0.974079 | 1.986425  |
| H | 4.662633  | -0.713836 | 3.981137  | H | -5.676327 | -2.369766 | 2.637859  |
| H | 5.913492  | -0.237358 | 2.819494  | O | -0.454608 | 0.768705  | -1.853196 |
| C | 3.513832  | 1.158600  | 2.314168  | S | -0.691116 | 4.219754  | 2.284303  |
| H | 4.373328  | 1.833720  | 2.224287  | O | -0.317152 | 3.264808  | -2.074454 |
| H | 3.148991  | 1.227227  | 3.346442  | H | -1.604953 | 4.665754  | -1.196868 |
| H | 2.722203  | 1.508239  | 1.645999  | C | 1.197504  | 4.873273  | -0.465470 |
| C | -3.488086 | -0.093691 | -3.565542 | C | 2.494580  | 4.370428  | -1.152670 |
| H | -2.704709 | -0.837892 | -3.395910 | C | 0.671448  | 6.158000  | -1.129134 |
| C | -2.817519 | 1.109270  | -4.254057 | H | 1.462554  | 5.106269  | 0.577112  |

|                                                |           |           |           |   |           |           |           |
|------------------------------------------------|-----------|-----------|-----------|---|-----------|-----------|-----------|
| C                                              | 3.565172  | 5.470757  | -1.187814 | C | 1.970689  | -1.142474 | 5.790014  |
| H                                              | 2.245200  | 4.057498  | -2.173790 | H | 2.992089  | -1.268881 | 5.400802  |
| H                                              | 2.872768  | 3.482936  | -0.630762 | H | 2.037883  | -1.228170 | 6.880008  |
| C                                              | 1.756559  | 7.246735  | -1.170310 | C | 1.074740  | -2.255802 | 5.230744  |
| H                                              | 0.348267  | 5.925401  | -2.153033 | H | 1.498853  | -3.245867 | 5.405289  |
| H                                              | -0.207217 | 6.531569  | -0.587984 | H | 0.095963  | -2.230481 | 5.733793  |
| C                                              | 3.038842  | 6.750040  | -1.854985 | C | 0.801954  | -2.087624 | 3.747183  |
| H                                              | 4.452234  | 5.100913  | -1.717387 | N | 0.670288  | -0.830751 | 3.317319  |
| H                                              | 3.886453  | 5.700728  | -0.161209 | H | 0.381912  | -0.654208 | 2.338878  |
| H                                              | 1.367834  | 8.134196  | -1.684721 | C | 1.179647  | -3.142026 | -0.584978 |
| H                                              | 1.991847  | 7.559762  | -0.142467 | C | -0.126476 | -3.156233 | 0.069732  |
| H                                              | 3.806314  | 7.533807  | -1.833668 | H | 1.885790  | -2.368555 | -0.288101 |
| H                                              | 2.827665  | 6.544667  | -2.914570 | H | -0.487564 | -2.196837 | 0.426142  |
| C                                              | 7.491536  | 2.094489  | -0.791444 | C | 1.937578  | 2.546545  | -0.658586 |
| H                                              | 6.737643  | 2.786294  | -0.398379 | C | 1.176215  | 3.705327  | -0.729412 |
| H                                              | 7.920662  | 1.542334  | 0.052453  | C | 1.655012  | 4.789135  | -1.547776 |
| H                                              | 8.293377  | 2.696140  | -1.234825 | C | 2.957726  | 4.689083  | -2.135126 |
| C                                              | -6.526089 | 3.810012  | -2.129684 | C | 3.722866  | 3.511782  | -1.936157 |
| H                                              | -5.544309 | 4.163057  | -2.465619 | C | 3.232875  | 2.424573  | -1.243501 |
| H                                              | -6.963627 | 3.205180  | -2.931972 | H | -0.122806 | 6.027298  | -1.439658 |
| H                                              | -7.165367 | 4.689986  | -1.993487 | C | 0.882536  | 5.948932  | -1.836032 |
|                                                |           |           |           | C | 3.453667  | 5.760103  | -2.926871 |
|                                                |           |           |           | H | 4.720189  | 3.461471  | -2.364668 |
|                                                |           |           |           | C | 2.688410  | 6.878158  | -3.165331 |
|                                                |           |           |           | C | 1.384482  | 6.962520  | -2.623077 |
|                                                |           |           |           | H | 4.449431  | 5.669822  | -3.354528 |
|                                                |           |           |           | H | 3.074695  | 7.687537  | -3.778649 |
|                                                |           |           |           | H | 0.769063  | 7.832937  | -2.834068 |
|                                                |           |           |           | C | -0.128097 | 3.797691  | -0.008278 |
|                                                |           |           |           | C | -0.413392 | 4.866174  | 0.912295  |
|                                                |           |           |           | C | -1.111585 | 2.841350  | -0.225501 |
|                                                |           |           |           | C | 0.576351  | 5.783521  | 1.363227  |
|                                                |           |           |           | C | -1.741007 | 4.995289  | 1.435863  |
|                                                |           |           |           | C | -2.449362 | 2.969368  | 0.255602  |
| <b>TS1-R-n-hexyl-anthryl E= -4613.33394631</b> |           |           |           |   |           |           |           |
| H                                              | 0.341853  | -1.690472 | -1.706430 |   |           |           |           |
| C                                              | 0.355611  | 1.555164  | 3.658957  |   |           |           |           |
| C                                              | 0.812486  | 0.321520  | 4.135031  |   |           |           |           |
| C                                              | 1.438136  | 0.211197  | 5.387144  |   |           |           |           |
| C                                              | 1.571050  | 1.360599  | 6.166662  |   |           |           |           |
| C                                              | 1.109002  | 2.597003  | 5.708434  |   |           |           |           |
| C                                              | 0.508148  | 2.692432  | 4.451096  |   |           |           |           |
| H                                              | -0.098276 | 1.611559  | 2.675864  |   |           |           |           |
| H                                              | 2.048262  | 1.284938  | 7.141163  |   |           |           |           |
| H                                              | 1.222266  | 3.481246  | 6.329152  |   |           |           |           |
| H                                              | 0.157074  | 3.651203  | 4.080994  |   |           |           |           |

|   |           |           |           |   |           |           |           |
|---|-----------|-----------|-----------|---|-----------|-----------|-----------|
| C | 0.264108  | 6.785789  | 2.256299  | H | -4.239644 | 4.593878  | -3.724592 |
| H | 1.594033  | 5.678352  | 1.005252  | C | -2.885895 | 2.175083  | -3.742136 |
| C | -2.034826 | 6.052294  | 2.340052  | H | -2.062059 | 1.529171  | -3.424450 |
| C | -2.736097 | 4.060137  | 1.050143  | H | -2.494616 | 2.894652  | -4.471485 |
| C | -1.056613 | 6.932507  | 2.743241  | H | -3.630257 | 1.555904  | -4.256981 |
| H | 1.040673  | 7.467759  | 2.591988  | C | -3.605172 | 1.085228  | 2.298373  |
| H | -3.050199 | 6.143090  | 2.718670  | H | -2.722439 | 1.724303  | 2.386345  |
| H | -3.750802 | 4.200934  | 1.413187  | C | -4.691488 | 1.665842  | 3.226648  |
| H | -1.291912 | 7.731995  | 3.440378  | H | -4.963714 | 2.688329  | 2.940896  |
| C | -3.513425 | 1.982663  | -0.128201 | H | -4.338467 | 1.686926  | 4.264897  |
| C | -3.996662 | 1.956515  | -1.460008 | H | -5.605003 | 1.059647  | 3.195770  |
| C | -4.058891 | 1.103071  | 0.838586  | C | -3.186346 | -0.321257 | 2.765401  |
| C | -5.000011 | 1.043049  | -1.799848 | H | -2.407791 | -0.723595 | 2.112274  |
| C | -5.064582 | 0.210698  | 0.447789  | H | -4.031395 | -1.019942 | 2.774533  |
| C | -5.542800 | 0.157442  | -0.864223 | H | -2.790316 | -0.272974 | 3.787195  |
| H | -5.376770 | 1.019379  | -2.818628 | C | 3.478481  | 0.477422  | -3.504085 |
| H | -5.483824 | -0.473167 | 1.180229  | H | 2.676256  | 1.205058  | -3.350669 |
| C | 4.060374  | 1.180348  | -1.087957 | C | 2.823747  | -0.798957 | -4.062780 |
| C | 4.765130  | 0.955999  | 0.117893  | H | 2.246014  | -0.553394 | -4.961604 |
| C | 4.178024  | 0.262409  | -2.160685 | H | 2.140320  | -1.241918 | -3.335605 |
| C | 5.571391  | -0.182397 | 0.232181  | H | 3.567238  | -1.551523 | -4.351980 |
| C | 4.996100  | -0.862049 | -1.995622 | C | 4.459563  | 1.061722  | -4.542775 |
| C | 5.697680  | -1.105108 | -0.810154 | H | 5.286300  | 0.365759  | -4.732043 |
| H | 6.124126  | -0.356032 | 1.151343  | H | 4.892555  | 2.009958  | -4.207428 |
| H | 5.093521  | -1.573648 | -2.809772 | H | 3.947355  | 1.242775  | -5.495567 |
| O | -0.819176 | 1.744667  | -1.018472 | C | 4.716888  | 1.940340  | 1.285873  |
| O | 1.467177  | 1.478510  | 0.088244  | H | 3.956227  | 2.694123  | 1.063934  |
| P | 0.189392  | 0.581060  | -0.438182 | C | 4.305553  | 1.263896  | 2.606065  |
| O | -0.350595 | -0.101413 | 0.793009  | H | 5.048254  | 0.527632  | 2.936260  |
| C | -3.498836 | 2.918063  | -2.539420 | H | 3.343411  | 0.754283  | 2.498358  |
| H | -2.708430 | 3.537787  | -2.107779 | H | 4.203955  | 2.011119  | 3.401798  |
| C | -4.621210 | 3.875367  | -2.988975 | C | 6.059656  | 2.683223  | 1.436133  |
| H | -5.026001 | 4.439362  | -2.140857 | H | 6.324000  | 3.214530  | 0.514848  |
| H | -5.451364 | 3.331078  | -3.454366 | H | 6.876011  | 1.988231  | 1.666443  |



|   |            |           |           |   |           |           |           |
|---|------------|-----------|-----------|---|-----------|-----------|-----------|
| H | 6.004726   | 3.418087  | 2.248643  | C | 4.891160  | -3.375826 | 0.871679  |
| O | 0.557451   | -0.248688 | -1.649032 | C | 9.484383  | -1.446470 | -2.838454 |
| S | 0.620964   | -3.449455 | 2.762190  | H | 7.696640  | -0.434433 | -2.272297 |
| O | 0.310308   | -2.741043 | -1.671260 | C | 9.846247  | -3.663473 | -1.941028 |
| H | 1.658182   | -4.098240 | -0.792386 | C | 8.167213  | -4.643374 | -0.423064 |
| C | -6.596957  | -0.830468 | -1.252640 | C | 6.512819  | -5.655695 | 1.101159  |
| C | -6.251326  | -1.956660 | -2.039144 | H | 4.261102  | -2.496421 | 0.795562  |
| C | -7.933727  | -0.648153 | -0.822969 | C | 4.498820  | -4.432088 | 1.653678  |
| C | -4.913570  | -2.200518 | -2.494682 | C | 10.275940 | -2.625289 | -2.723239 |
| C | -7.268390  | -2.921857 | -2.393601 | H | 9.838815  | -0.623041 | -3.452877 |
| C | -8.940595  | -1.623095 | -1.178407 | H | 10.444423 | -4.566035 | -1.838998 |
| C | -8.348646  | 0.488447  | -0.054817 | H | 8.783674  | -5.535549 | -0.331571 |
| C | -4.608424  | -3.300673 | -3.255212 | C | 5.321377  | -5.589750 | 1.772477  |
| H | -4.135851  | -1.491817 | -2.232799 | H | 7.147521  | -6.535205 | 1.182688  |
| C | -6.906159  | -4.056033 | -3.187439 | H | 3.553302  | -4.385736 | 2.188170  |
| C | -8.581505  | -2.731464 | -1.951576 | H | 11.221732 | -2.692515 | -3.254156 |
| C | -10.286674 | -1.427948 | -0.735347 | H | 4.996595  | -6.417791 | 2.396949  |
| H | -7.610347  | 1.239362  | 0.203537  | C | -1.017043 | -4.360097 | 0.042950  |
| C | -9.650517  | 0.640230  | 0.346785  | C | -2.484005 | -4.058651 | 0.374166  |
| C | -5.617042  | -4.242506 | -3.609974 | C | -3.375034 | -5.304769 | 0.305712  |
| H | -3.587400  | -3.456201 | -3.593399 | H | -2.535916 | -3.618477 | 1.378981  |
| H | -7.684048  | -4.769360 | -3.449937 | H | -2.864856 | -3.300680 | -0.322480 |
| H | -9.343035  | -3.460971 | -2.220329 | H | -3.336037 | -5.721936 | -0.711456 |
| C | -10.634905 | -0.332170 | 0.007921  | H | -2.971586 | -6.081756 | 0.972526  |
| H | -11.030681 | -2.173219 | -1.007088 | C | -4.835867 | -5.020072 | 0.678517  |
| H | -9.939218  | 1.513058  | 0.926408  | H | -5.224483 | -4.221015 | 0.032322  |
| H | -5.357534  | -5.106698 | -4.215567 | H | -4.877701 | -4.632255 | 1.707353  |
| H | -11.661566 | -0.195865 | 0.336979  | C | -5.746361 | -6.249154 | 0.561407  |
| C | 6.557247   | -2.321882 | -0.666539 | H | -5.713457 | -6.621747 | -0.472182 |
| C | 7.789360   | -2.404333 | -1.359866 | H | -5.351078 | -7.058506 | 1.192348  |
| C | 6.131956   | -3.394911 | 0.154192  | H | -0.610690 | -5.097276 | 0.749832  |
| C | 8.286523   | -1.339530 | -2.180331 | H | -0.926066 | -4.819969 | -0.950016 |
| C | 8.604584   | -3.592064 | -1.234242 | C | -7.199815 | -5.958609 | 0.951230  |
| C | 6.957422   | -4.576131 | 0.274202  | H | -7.826783 | -6.852684 | 0.853417  |

|                                            |           |           |           |   |           |           |           |
|--------------------------------------------|-----------|-----------|-----------|---|-----------|-----------|-----------|
| H                                          | -7.270041 | -5.615077 | 1.990883  | H | 1.448979  | 5.180344  | -1.182149 |
| H                                          | -7.629471 | -5.175703 | 0.314692  | C | 2.351719  | 4.823570  | -1.663611 |
| <b>TS1-R-n-hexyl-iPr E= -3772.64965077</b> |           |           |           | C | 4.660985  | 3.928254  | -2.968349 |
| H                                          | -0.461707 | -2.276488 | -2.028950 | H | 5.142900  | 1.303282  | -2.672200 |
| C                                          | 0.652599  | 0.399854  | 3.526686  | C | 4.287809  | 5.249001  | -3.064171 |
| C                                          | 0.765203  | -0.949636 | 3.877456  | C | 3.112566  | 5.693497  | -2.414065 |
| C                                          | 1.402351  | -1.341425 | 5.065730  | H | 5.549586  | 3.566033  | -3.480095 |
| C                                          | 1.899164  | -0.349810 | 5.911883  | H | 4.882565  | 5.946713  | -3.647301 |
| C                                          | 1.781775  | 1.002302  | 5.580010  | H | 2.802586  | 6.730447  | -2.511969 |
| C                                          | 1.164559  | 1.373636  | 4.383274  | C | 0.796527  | 2.943600  | 0.079856  |
| H                                          | 0.180006  | 0.668763  | 2.588603  | C | 0.922873  | 3.951759  | 1.098791  |
| H                                          | 2.388648  | -0.643141 | 6.837900  | C | -0.454568 | 2.377060  | -0.130359 |
| H                                          | 2.175028  | 1.760842  | 6.250821  | C | 2.178698  | 4.458667  | 1.535742  |
| H                                          | 1.079661  | 2.421404  | 4.110915  | C | -0.261395 | 4.441850  | 1.739633  |
| C                                          | 1.548517  | -2.820417 | 5.329085  | C | -1.652237 | 2.882199  | 0.459535  |
| H                                          | 2.464917  | -3.193123 | 4.847189  | C | 2.255541  | 5.412118  | 2.528005  |
| H                                          | 1.654088  | -3.019060 | 6.401166  | H | 3.087371  | 4.074066  | 1.087157  |
| C                                          | 0.338956  | -3.581242 | 4.770018  | C | -0.148941 | 5.439377  | 2.746294  |
| H                                          | 0.467120  | -4.662227 | 4.844888  | C | -1.524878 | 3.919701  | 1.360379  |
| H                                          | -0.560826 | -3.320569 | 5.347983  | C | 1.081485  | 5.918566  | 3.134790  |
| C                                          | 0.048096  | -3.215250 | 3.325907  | H | 3.227721  | 5.775506  | 2.850057  |
| N                                          | 0.255112  | -1.938720 | 2.994983  | H | -1.058899 | 5.808361  | 3.213661  |
| H                                          | -0.022665 | -1.602545 | 2.055440  | H | -2.419644 | 4.342508  | 1.809840  |
| C                                          | -0.017789 | -3.946442 | -0.987872 | H | 1.155138  | 6.676231  | 3.910160  |
| C                                          | -1.287029 | -3.669178 | -0.318659 | C | -3.007664 | 2.363941  | 0.075168  |
| H                                          | 0.858084  | -3.394889 | -0.648733 | C | -3.536405 | 2.668859  | -1.204380 |
| H                                          | -1.389292 | -2.672402 | 0.100322  | C | -3.789710 | 1.634357  | 1.000806  |
| C                                          | 2.309989  | 1.168583  | -0.818276 | C | -4.828511 | 2.241853  | -1.523870 |
| C                                          | 1.961294  | 2.510247  | -0.747585 | C | -5.079518 | 1.234179  | 0.626546  |
| C                                          | 2.720757  | 3.456481  | -1.522414 | C | -5.622214 | 1.524169  | -0.624754 |
| C                                          | 3.887520  | 3.001729  | -2.217878 | H | -5.228984 | 2.486459  | -2.504645 |
| C                                          | 4.239306  | 1.628834  | -2.164134 | H | -5.684103 | 0.676627  | 1.338661  |
| C                                          | 3.461707  | 0.693918  | -1.513114 | C | 3.852188  | -0.756704 | -1.511524 |
|                                            |           |           |           | C | 4.502865  | -1.304483 | -0.380111 |

|   |           |           |           |   |           |           |           |
|---|-----------|-----------|-----------|---|-----------|-----------|-----------|
| C | 3.626387  | -1.560729 | -2.654343 | H | 1.188582  | -2.297783 | -3.784826 |
| C | 4.916812  | -2.640051 | -0.414144 | H | 2.399206  | -2.880900 | -4.948254 |
| C | 4.063488  | -2.891993 | -2.633667 | C | 4.009520  | -0.640429 | -4.982674 |
| C | 4.708441  | -3.454417 | -1.530858 | H | 4.590816  | -1.520069 | -5.286164 |
| H | 5.424860  | -3.052050 | 0.454497  | H | 4.713865  | 0.111486  | -4.612841 |
| H | 3.898817  | -3.513799 | -3.510128 | H | 3.522096  | -0.234249 | -5.877492 |
| O | -0.573880 | 1.322854  | -1.020936 | C | 4.812765  | -0.469437 | 0.861884  |
| O | 1.557756  | 0.244929  | -0.110372 | H | 4.312516  | 0.497219  | 0.756084  |
| P | 0.036921  | -0.147981 | -0.609421 | C | 4.273251  | -1.111757 | 2.152455  |
| O | -0.633572 | -0.744272 | 0.603211  | H | 4.775405  | -2.060676 | 2.377492  |
| C | -2.765520 | 3.482805  | -2.244109 | H | 3.199466  | -1.304760 | 2.070555  |
| H | -1.780823 | 3.721864  | -1.833932 | H | 4.432486  | -0.443158 | 3.006699  |
| C | -3.462666 | 4.827722  | -2.532513 | C | 6.323956  | -0.183871 | 0.972105  |
| H | -3.587937 | 5.414264  | -1.615127 | H | 6.694352  | 0.333148  | 0.079729  |
| H | -4.456225 | 4.681294  | -2.972454 | H | 6.898168  | -1.111774 | 1.082218  |
| H | -2.870363 | 5.422374  | -3.238681 | H | 6.535324  | 0.447713  | 1.843820  |
| C | -2.530925 | 2.685356  | -3.541291 | O | 0.067228  | -0.928571 | -1.905170 |
| H | -1.999015 | 1.752255  | -3.333583 | S | -0.556597 | -4.386341 | 2.267830  |
| H | -1.929442 | 3.273570  | -4.245142 | O | -0.737432 | -3.292043 | -2.056735 |
| H | -3.476119 | 2.438778  | -4.039988 | H | 0.203820  | -4.982791 | -1.241075 |
| C | -3.292852 | 1.264804  | 2.398569  | C | -2.483631 | -4.555725 | -0.455567 |
| H | -2.239567 | 1.549420  | 2.470066  | C | -3.762237 | -3.794832 | -0.849692 |
| C | -4.055136 | 2.040472  | 3.491681  | C | -4.988883 | -4.713084 | -0.921676 |
| H | -3.967558 | 3.124139  | 3.353086  | H | -3.942453 | -2.992362 | -0.121471 |
| H | -3.660892 | 1.792959  | 4.484958  | H | -3.599933 | -3.308001 | -1.819012 |
| H | -5.123392 | 1.792132  | 3.484080  | C | -6.276073 | -3.970825 | -1.303746 |
| C | -3.363025 | -0.252102 | 2.657009  | H | -4.802187 | -5.515525 | -1.650677 |
| H | -2.797084 | -0.794666 | 1.895164  | H | -5.130283 | -5.209598 | 0.049854  |
| H | -4.396285 | -0.619090 | 2.656322  | H | -6.462279 | -3.169138 | -0.573887 |
| H | -2.931939 | -0.486444 | 3.638297  | H | -6.133870 | -3.471901 | -2.273729 |
| C | 2.956976  | -1.017723 | -3.918581 | C | -7.508029 | -4.882595 | -1.379499 |
| H | 2.414460  | -0.108520 | -3.643723 | H | -7.645582 | -5.386376 | -0.412090 |
| C | 1.926051  | -1.985511 | -4.526939 | H | -7.323979 | -5.679664 | -2.113928 |
| H | 1.390797  | -1.488288 | -5.344385 | C | -8.791105 | -4.131670 | -1.751176 |

|                                           |           |           |           |   |           |           |           |
|-------------------------------------------|-----------|-----------|-----------|---|-----------|-----------|-----------|
| H                                         | -9.650871 | -4.809516 | -1.802472 | H | 1.416478  | -0.648510 | 2.527830  |
| H                                         | -9.022811 | -3.354397 | -1.012544 | H | -0.076013 | -2.164463 | 7.013082  |
| H                                         | -8.694194 | -3.640953 | -2.727486 | H | 2.073194  | -2.993895 | 6.085040  |
| H                                         | -2.640873 | -5.041932 | 0.516342  | H | 2.818179  | -2.245730 | 3.827048  |
| H                                         | -2.267153 | -5.354219 | -1.175590 | C | -1.877260 | -0.439813 | 5.794219  |
| C                                         | -7.037246 | 1.087036  | -0.981004 | H | -2.674332 | -1.100735 | 5.421683  |
| C                                         | -7.075240 | 0.197196  | -2.237214 | H | -1.935200 | -0.463887 | 6.887886  |
| C                                         | -7.981037 | 2.295972  | -1.133312 | C | -2.123907 | 0.986690  | 5.286494  |
| H                                         | -6.734996 | 0.742892  | -3.125244 | H | -3.129813 | 1.336211  | 5.523539  |
| H                                         | -6.431949 | -0.681528 | -2.119085 | H | -1.416965 | 1.677390  | 5.771096  |
| H                                         | -8.096925 | -0.150422 | -2.432999 | C | -1.895179 | 1.111390  | 3.791017  |
| H                                         | -9.007765 | 1.965515  | -1.333353 | N | -0.883941 | 0.392257  | 3.295447  |
| H                                         | -7.989809 | 2.907987  | -0.224615 | H | -0.600586 | 0.519707  | 2.308038  |
| H                                         | -7.668941 | 2.938984  | -1.965059 | C | -3.128195 | 1.455584  | -0.355172 |
| C                                         | 5.175082  | -4.904825 | -1.558768 | C | -2.287147 | 2.523096  | 0.183302  |
| C                                         | 4.488329  | -5.753724 | -0.472174 | H | -2.888474 | 0.434684  | -0.060907 |
| C                                         | 6.708447  | -5.014522 | -1.454849 | H | -1.272592 | 2.230318  | 0.438834  |
| H                                         | 4.752676  | -5.404476 | 0.532978  | C | 0.253982  | -2.726370 | -0.802543 |
| H                                         | 3.397259  | -5.707393 | -0.563056 | C | 1.581593  | -3.119859 | -0.893581 |
| H                                         | 4.792731  | -6.804559 | -0.550213 | C | 1.903552  | -4.245174 | -1.733016 |
| H                                         | 7.029114  | -6.060714 | -1.530970 | C | 0.834769  | -4.996726 | -2.321470 |
| H                                         | 7.200070  | -4.447142 | -2.252646 | C | -0.506117 | -4.580383 | -2.119134 |
| H                                         | 7.070183  | -4.623649 | -0.496308 | C | -0.821363 | -3.439964 | -1.411084 |
| H                                         | -7.408955 | 0.484485  | -0.140428 | H | 4.062919  | -4.053350 | -1.647006 |
| H                                         | 4.881718  | -5.318792 | -2.533366 | C | 3.237369  | -4.633427 | -2.041705 |
| <b>TS1-R-n-hexyl-Ph E= -3998.86681623</b> |           |           |           | C | 1.134637  | -6.126990 | -3.129295 |
| H                                         | -1.605927 | 1.265973  | -1.666173 | H | -1.304673 | -5.165141 | -2.567712 |
| C                                         | 1.111992  | -0.979538 | 3.514191  | C | 2.436775  | -6.489977 | -3.384888 |
| C                                         | -0.088734 | -0.507869 | 4.054814  | C | 3.495593  | -5.722931 | -2.845049 |
| C                                         | -0.536411 | -0.938746 | 5.314191  | H | 0.309088  | -6.691037 | -3.557007 |
| C                                         | 0.259501  | -1.830467 | 6.033772  | H | 2.654188  | -7.351173 | -4.010661 |
| C                                         | 1.466945  | -2.299265 | 5.510642  | H | 4.524192  | -5.991370 | -3.070515 |
| C                                         | 1.887080  | -1.877559 | 4.247266  | C | 2.644683  | -2.353540 | -0.177137 |
|                                           |           |           |           | C | 3.573707  | -2.996562 | 0.714047  |

|   |           |           |           |   |           |           |           |
|---|-----------|-----------|-----------|---|-----------|-----------|-----------|
| C | 2.768022  | -0.982484 | -0.372625 | H | 4.312854  | -0.446467 | -2.308684 |
| C | 3.423968  | -4.343477 | 1.147868  | C | 5.996509  | 0.482694  | -3.228139 |
| C | 4.678407  | -2.242388 | 1.227786  | H | 6.693674  | 0.265562  | -2.410820 |
| C | 3.882437  | -0.221729 | 0.093844  | H | 6.302587  | 1.431903  | -3.683663 |
| C | 4.328860  | -4.917722 | 2.014228  | H | 6.106414  | -0.301552 | -3.987007 |
| H | 2.573479  | -4.917843 | 0.799276  | C | 3.555437  | 0.783577  | -3.879608 |
| C | 5.605010  | -2.870044 | 2.104865  | H | 2.522609  | 0.784479  | -3.519386 |
| C | 4.823343  | -0.880139 | 0.859078  | H | 3.654534  | -0.006099 | -4.634450 |
| C | 5.438873  | -4.180674 | 2.491201  | H | 3.747272  | 1.741743  | -4.377703 |
| H | 4.185727  | -5.945185 | 2.337719  | C | 3.619634  | 1.939627  | 2.175649  |
| H | 6.444664  | -2.286539 | 2.475196  | H | 3.378249  | 0.876899  | 2.258675  |
| H | 5.695231  | -0.335206 | 1.211706  | C | 4.810154  | 2.214140  | 3.115813  |
| H | 6.150132  | -4.647509 | 3.167079  | H | 5.693468  | 1.631843  | 2.829209  |
| C | 4.063575  | 1.222725  | -0.272093 | H | 4.551463  | 1.952875  | 4.149168  |
| C | 4.382159  | 1.575114  | -1.607527 | H | 5.094362  | 3.273293  | 3.100573  |
| C | 3.977847  | 2.231655  | 0.718297  | C | 2.370184  | 2.718199  | 2.630050  |
| C | 4.606863  | 2.918309  | -1.919939 | H | 1.521396  | 2.492479  | 1.978839  |
| C | 4.218355  | 3.560644  | 0.353861  | H | 2.539313  | 3.801610  | 2.621038  |
| C | 4.533232  | 3.931892  | -0.957365 | H | 2.104292  | 2.434737  | 3.656061  |
| H | 4.881666  | 3.182604  | -2.937119 | C | -2.207191 | -2.195476 | -3.756975 |
| H | 4.128441  | 4.336903  | 1.108382  | H | -1.132464 | -2.338288 | -3.614855 |
| C | -2.239438 | -2.963974 | -1.287943 | C | -2.393430 | -0.793874 | -4.366385 |
| C | -2.936857 | -3.130169 | -0.066935 | H | -1.803544 | -0.712125 | -5.287070 |
| C | -2.887100 | -2.364027 | -2.396627 | H | -2.053782 | -0.018848 | -3.676916 |
| C | -4.255776 | -2.677751 | 0.029798  | H | -3.438242 | -0.593925 | -4.633008 |
| C | -4.209851 | -1.931053 | -2.249091 | C | -2.700012 | -3.271674 | -4.747515 |
| C | -4.912595 | -2.066773 | -1.046079 | H | -3.776506 | -3.168830 | -4.932508 |
| H | -4.803299 | -2.833102 | 0.954607  | H | -2.525078 | -4.285200 | -4.371204 |
| H | -4.700687 | -1.444968 | -3.086639 | H | -2.182785 | -3.173615 | -5.709683 |
| O | 1.819165  | -0.318618 | -1.130874 | C | -2.316260 | -3.865443 | 1.120395  |
| O | -0.065349 | -1.630350 | -0.019062 | H | -1.235983 | -3.916174 | 0.960286  |
| P | 0.302336  | -0.106241 | -0.531494 | C | -2.534816 | -3.143573 | 2.461301  |
| O | 0.260202  | 0.739287  | 0.716459  | H | -3.590382 | -3.138690 | 2.758856  |
| C | 4.541270  | 0.539694  | -2.721140 | H | -2.189334 | -2.106502 | 2.408382  |

|   |           |           |           |                                                   |           |           |           |
|---|-----------|-----------|-----------|---------------------------------------------------|-----------|-----------|-----------|
| H | -1.973136 | -3.647922 | 3.256140  | H                                                 | -4.361567 | 3.935033  | -1.141072 |
| C | -2.834939 | -5.316876 | 1.184611  | H                                                 | -4.746331 | 3.858129  | 0.579099  |
| H | -2.615310 | -5.857515 | 0.257262  | C                                                 | -5.791119 | 6.228954  | -0.446804 |
| H | -3.920931 | -5.340823 | 1.336300  | H                                                 | -4.051296 | 6.258412  | 0.839131  |
| H | -2.365041 | -5.859556 | 2.014117  | H                                                 | -3.672958 | 6.337540  | -0.876427 |
| O | -0.525510 | 0.288400  | -1.734107 | H                                                 | -6.072692 | 5.827764  | -1.431648 |
| S | -2.863249 | 2.154854  | 2.881606  | H                                                 | -6.452065 | 5.736881  | 0.282153  |
| O | -2.437213 | 1.895918  | -1.547939 | C                                                 | -6.050565 | 7.741094  | -0.422981 |
| H | -4.198786 | 1.629130  | -0.434728 | H                                                 | -5.392160 | 8.233277  | -1.152840 |
| C | -2.629834 | 3.982745  | 0.150851  | H                                                 | -5.766665 | 8.140961  | 0.560904  |
| C | 4.782636  | 5.352122  | -1.314815 | C                                                 | -7.508369 | 8.106841  | -0.721649 |
| C | 4.338932  | 5.879035  | -2.540187 | H                                                 | -7.661984 | 9.191686  | -0.694860 |
| C | 5.469319  | 6.208905  | -0.437064 | H                                                 | -7.811182 | 7.751941  | -1.714525 |
| C | 4.573570  | 7.212174  | -2.875627 | H                                                 | -8.188238 | 7.655727  | 0.011739  |
| H | 3.783480  | 5.242331  | -3.223164 | H                                                 | -1.957028 | 4.451127  | -0.581244 |
| C | 5.703015  | 7.542526  | -0.770693 | H                                                 | -2.331571 | 4.395042  | 1.122639  |
| H | 5.844221  | 5.816714  | 0.504263  |                                                   |           |           |           |
| C | 5.256535  | 8.050875  | -1.992293 |                                                   |           |           |           |
| H | 4.214115  | 7.598537  | -3.826012 | <b>TS1-R-<i>n</i>-hexyl-tBu E= -3851.25955242</b> |           |           |           |
| H | 6.243276  | 8.183331  | -0.078430 | H                                                 | -2.059395 | 0.573953  | -1.802925 |
| H | 5.439135  | 9.089884  | -2.253332 | C                                                 | 1.125704  | -0.215712 | 3.535032  |
| C | -6.309269 | -1.576738 | -0.914331 | C                                                 | -0.175616 | -0.148830 | 4.044007  |
| C | -7.225000 | -1.703267 | -1.973409 | C                                                 | -0.474150 | -0.607487 | 5.337062  |
| C | -6.752075 | -0.967459 | 0.273135  | C                                                 | 0.565052  | -1.109449 | 6.121024  |
| C | -8.533426 | -1.237114 | -1.850956 | C                                                 | 1.871180  | -1.170929 | 5.629014  |
| H | -6.912473 | -2.193764 | -2.891028 | C                                                 | 2.147203  | -0.729606 | 4.333030  |
| C | -8.061048 | -0.501895 | 0.396840  | H                                                 | 1.319780  | 0.121847  | 2.523238  |
| H | -6.056181 | -0.838847 | 1.097823  | H                                                 | 0.344710  | -1.461446 | 7.126386  |
| C | -8.958169 | -0.634093 | -0.665013 | H                                                 | 2.667389  | -1.565779 | 6.253645  |
| H | -9.225328 | -1.353394 | -2.681210 | H                                                 | 3.157026  | -0.783928 | 3.937311  |
| H | -8.377673 | -0.027901 | 1.322430  | C                                                 | -1.915928 | -0.568934 | 5.781252  |
| H | -9.978091 | -0.271492 | -0.569313 | H                                                 | -2.425786 | -1.491189 | 5.464441  |
| C | -4.088091 | 4.338900  | -0.157490 | H                                                 | -1.988449 | -0.529633 | 6.873623  |
| C | -4.334909 | 5.853445  | -0.143359 | C                                                 | -2.629157 | 0.641149  | 5.163750  |
|   |           |           |           | H                                                 | -3.699349 | 0.635805  | 5.376023  |

|   |           |           |           |   |           |           |           |
|---|-----------|-----------|-----------|---|-----------|-----------|-----------|
| H | -2.218320 | 1.568758  | 5.590847  | H | 6.075781  | -3.504188 | 2.560146  |
| C | -2.421760 | 0.725756  | 3.662251  | H | 6.587933  | 0.767147  | 2.523365  |
| N | -1.216573 | 0.356542  | 3.220137  | H | 5.121602  | 2.165880  | 1.158423  |
| H | -0.975302 | 0.490413  | 2.222706  | H | 7.294493  | -1.466291 | 3.330254  |
| C | -3.597427 | 0.357589  | -0.507941 | C | 3.020170  | 2.828327  | -0.404672 |
| C | -3.160756 | 1.674819  | -0.051329 | C | 3.180189  | 3.218548  | -1.758430 |
| H | -3.047687 | -0.506221 | -0.136312 | C | 2.505707  | 3.757022  | 0.527429  |
| H | -2.113425 | 1.742471  | 0.228910  | C | 2.820160  | 4.513480  | -2.136820 |
| C | 1.224962  | -2.379214 | -0.723755 | C | 2.164490  | 5.045846  | 0.090415  |
| C | 2.595717  | -2.176951 | -0.804941 | C | 2.306328  | 5.454882  | -1.235905 |
| C | 3.376958  | -3.097781 | -1.588990 | H | 2.953000  | 4.797466  | -3.176980 |
| C | 2.737236  | -4.259945 | -2.129814 | H | 1.771729  | 5.740936  | 0.823885  |
| C | 1.345769  | -4.446997 | -1.929295 | C | -0.917043 | -3.717866 | -1.134511 |
| C | 0.564666  | -3.517775 | -1.274422 | C | -1.459512 | -4.145656 | 0.100780  |
| H | 5.249603  | -2.003717 | -1.526165 | C | -1.773222 | -3.526168 | -2.242925 |
| C | 4.754265  | -2.897690 | -1.886016 | C | -2.835861 | -4.364588 | 0.199356  |
| C | 3.500292  | -5.193716 | -2.882082 | C | -3.146891 | -3.767084 | -2.088417 |
| H | 0.879788  | -5.343209 | -2.329940 | C | -3.710182 | -4.184301 | -0.880359 |
| C | 4.837046  | -4.981410 | -3.128328 | H | -3.234804 | -4.698556 | 1.153171  |
| C | 5.462383  | -3.812242 | -2.635033 | H | -3.786085 | -3.621882 | -2.951160 |
| H | 2.998613  | -6.075408 | -3.273981 | O | 1.645753  | 0.446821  | -1.185544 |
| H | 5.408784  | -5.698200 | -3.711341 | O | 0.459885  | -1.479027 | -0.000033 |
| H | 6.511164  | -3.629775 | -2.853489 | P | 0.170885  | 0.032260  | -0.588506 |
| C | 3.226436  | -1.004166 | -0.129072 | O | -0.233659 | 0.850934  | 0.611652  |
| C | 4.319444  | -1.158889 | 0.793822  | C | 3.774380  | 2.293575  | -2.821692 |
| C | 2.769623  | 0.281407  | -0.393341 | H | 3.975612  | 1.323192  | -2.360324 |
| C | 4.739191  | -2.424034 | 1.291837  | C | 5.126612  | 2.828748  | -3.334898 |
| C | 4.994821  | 0.011270  | 1.271261  | H | 5.837289  | 2.967094  | -2.512112 |
| C | 3.452754  | 1.460026  | 0.034536  | H | 5.011481  | 3.794256  | -3.841769 |
| C | 5.781521  | -2.526703 | 2.187565  | H | 5.568642  | 2.126863  | -4.052637 |
| H | 4.217336  | -3.317263 | 0.968328  | C | 2.796291  | 2.044372  | -3.985836 |
| C | 6.078886  | -0.130494 | 2.180211  | H | 1.855030  | 1.622909  | -3.621380 |
| C | 4.565157  | 1.290557  | 0.833566  | H | 3.232645  | 1.338747  | -4.703426 |
| C | 6.468677  | -1.371392 | 2.630473  | H | 2.571049  | 2.970117  | -4.529082 |

|   |           |           |           |   |            |           |           |
|---|-----------|-----------|-----------|---|------------|-----------|-----------|
| C | 2.293095  | 3.424240  | 2.004863  | C | -3.956067  | 2.938529  | -0.185774 |
| H | 2.521787  | 2.365232  | 2.150100  | C | -5.445882  | 2.785083  | -0.509528 |
| C | 3.248498  | 4.227401  | 2.909869  | C | -6.164372  | 4.138347  | -0.599177 |
| H | 4.297627  | 4.050067  | 2.646512  | H | -5.559676  | 2.249403  | -1.461279 |
| H | 3.109858  | 3.945643  | 3.960891  | H | -5.926896  | 2.169916  | 0.263300  |
| H | 3.065937  | 5.305623  | 2.826395  | C | -7.659674  | 4.009006  | -0.916132 |
| C | 0.828567  | 3.626804  | 2.437539  | H | -6.039248  | 4.679207  | 0.350270  |
| H | 0.160416  | 3.030360  | 1.810539  | H | -5.680494  | 4.756703  | -1.369567 |
| H | 0.524598  | 4.678185  | 2.370368  | H | -7.784849  | 3.470765  | -1.867366 |
| H | 0.697585  | 3.312248  | 3.480442  | H | -8.140987  | 3.385550  | -0.147991 |
| C | -1.255849 | -3.099876 | -3.618170 | C | -8.385360  | 5.358652  | -0.998527 |
| H | -0.237841 | -2.721154 | -3.490556 | H | -7.905398  | 5.981370  | -1.766845 |
| C | -2.076214 | -1.961169 | -4.252488 | H | -8.257697  | 5.896001  | -0.048035 |
| H | -1.593110 | -1.630847 | -5.179770 | C | -9.879180  | 5.221857  | -1.311193 |
| H | -2.140420 | -1.102643 | -3.581016 | H | -10.368325 | 6.201314  | -1.361872 |
| H | -3.092882 | -2.279507 | -4.513386 | H | -10.038759 | 4.719528  | -2.273272 |
| C | -1.193443 | -4.305003 | -4.580045 | H | -10.392794 | 4.632457  | -0.541555 |
| H | -2.193687 | -4.722230 | -4.750821 | H | -3.457530  | 3.548588  | -0.952180 |
| H | -0.562672 | -5.108716 | -4.185679 | H | -3.823667  | 3.488724  | 0.753968  |
| H | -0.785917 | -4.001174 | -5.552109 | C | 1.931124   | 6.865862  | -1.725640 |
| C | -0.581933 | -4.428254 | 1.319829  | C | 1.363997   | 7.748993  | -0.597593 |
| H | 0.436388  | -4.104512 | 1.087868  | C | 3.188626   | 7.564171  | -2.296114 |
| C | -1.029536 | -3.638334 | 2.562549  | C | 0.858245   | 6.757731  | -2.835352 |
| H | -2.023171 | -3.949574 | 2.907878  | H | 0.453127   | 7.320945  | -0.163372 |
| H | -1.062404 | -2.566225 | 2.347991  | H | 2.090164   | 7.896978  | 0.209945  |
| H | -0.327256 | -3.797377 | 3.389380  | H | 1.107676   | 8.737624  | -0.995796 |
| C | -0.516517 | -5.940271 | 1.614975  | H | 3.619610   | 7.004555  | -3.132817 |
| H | -0.140484 | -6.496280 | 0.748790  | H | 2.938089   | 8.568940  | -2.659048 |
| H | -1.506354 | -6.341533 | 1.864156  | H | 3.963300   | 7.663812  | -1.527024 |
| H | 0.149951  | -6.139795 | 2.463157  | H | 0.582768   | 7.755072  | -3.200390 |
| O | -0.734819 | -0.010691 | -1.800207 | H | 1.214530   | 6.175624  | -3.691543 |
| S | -3.661146 | 1.313087  | 2.676041  | H | -0.048030  | 6.271425  | -2.456318 |
| O | -3.055504 | 0.912976  | -1.728497 | C | -5.217098  | -4.452010 | -0.705468 |
| H | -4.665350 | 0.172345  | -0.600813 | C | -5.783441  | -3.519357 | 0.391530  |



|   |           |           |           |
|---|-----------|-----------|-----------|
| C | -6.014202 | -4.205872 | -2.000734 |
| C | -5.434421 | -5.924905 | -0.283091 |
| H | -5.284540 | -3.671306 | 1.354188  |
| H | -5.656152 | -2.466098 | 0.114077  |
| H | -6.855213 | -3.703776 | 0.536698  |
| H | -5.684837 | -4.863564 | -2.813083 |
| H | -7.077329 | -4.405932 | -1.824127 |
| H | -5.925818 | -3.168971 | -2.344900 |
| H | -6.503654 | -6.130872 | -0.147919 |
| H | -5.049863 | -6.610724 | -1.046678 |
| H | -4.928531 | -6.157676 | 0.659683  |

**TS1-S-cyclohexyl-anthryl E= -4612.13935299**

|   |           |           |           |
|---|-----------|-----------|-----------|
| H | -0.236351 | -1.798420 | -1.351540 |
| C | -0.399629 | 1.923919  | 3.681447  |
| C | 0.252097  | 0.821759  | 4.246229  |
| C | 0.871594  | 0.908375  | 5.503268  |
| C | 0.804262  | 2.117654  | 6.195878  |
| C | 0.149131  | 3.223566  | 5.648162  |
| C | -0.445977 | 3.124804  | 4.388344  |
| H | -0.847576 | 1.830448  | 2.698290  |
| H | 1.276434  | 2.193000  | 7.172806  |
| H | 0.107680  | 4.157401  | 6.201582  |
| H | -0.948198 | 3.981838  | 3.948911  |
| C | 1.611305  | -0.306821 | 6.007852  |
| H | 2.646177  | -0.293038 | 5.634130  |
| H | 1.673184  | -0.301300 | 7.101525  |
| C | 0.916654  | -1.588593 | 5.528738  |
| H | 1.488956  | -2.481642 | 5.784023  |
| H | -0.065036 | -1.681277 | 6.017857  |
| C | 0.655539  | -1.575093 | 4.033244  |
| N | 0.316914  | -0.393984 | 3.513338  |
| H | 0.011010  | -0.334709 | 2.525075  |
| C | -0.791263 | -3.005892 | 0.180378  |

|   |           |           |           |
|---|-----------|-----------|-----------|
| C | 0.660316  | -3.064169 | 0.335623  |
| H | -1.351656 | -3.931767 | 0.280414  |
| C | 0.992206  | 2.828089  | -0.860592 |
| C | 0.029041  | 3.810092  | -1.057804 |
| C | 0.304707  | 4.853899  | -2.011701 |
| C | 1.606975  | 4.926782  | -2.604150 |
| C | 2.576085  | 3.944879  | -2.276940 |
| C | 2.291307  | 2.880128  | -1.448457 |
| H | -1.674748 | 5.741857  | -2.032096 |
| C | -0.668933 | 5.804029  | -2.429861 |
| C | 1.899933  | 5.965180  | -3.529360 |
| H | 3.567429  | 4.025844  | -2.715110 |
| C | 0.941151  | 6.882818  | -3.891330 |
| C | -0.359631 | 6.788168  | -3.343440 |
| H | 2.898203  | 6.009498  | -3.958482 |
| H | 1.173961  | 7.667920  | -4.605412 |
| H | -1.125849 | 7.494920  | -3.650513 |
| C | -1.279546 | 3.749576  | -0.340098 |
| C | -1.780535 | 4.852545  | 0.436683  |
| C | -2.061028 | 2.606137  | -0.426309 |
| C | -0.993217 | 5.992262  | 0.760355  |
| C | -3.119766 | 4.791330  | 0.944097  |
| C | -3.405415 | 2.530620  | 0.048221  |
| C | -1.509562 | 7.023524  | 1.515070  |
| H | 0.033474  | 6.038126  | 0.415523  |
| C | -3.628358 | 5.881154  | 1.701920  |
| C | -3.911325 | 3.639691  | 0.693120  |
| C | -2.844438 | 6.977159  | 1.982277  |
| H | -0.884118 | 7.878913  | 1.755969  |
| H | -4.650470 | 5.824434  | 2.068920  |
| H | -4.939441 | 3.629067  | 1.045393  |
| H | -3.242674 | 7.800560  | 2.568790  |
| C | -4.221121 | 1.292751  | -0.182392 |
| C | -4.607408 | 0.945201  | -1.501215 |

|   |           |           |           |   |           |           |           |
|---|-----------|-----------|-----------|---|-----------|-----------|-----------|
| C | -4.591784 | 0.462172  | 0.904023  | C | -3.572631 | -0.373970 | 3.093525  |
| C | -5.312461 | -0.243941 | -1.710514 | H | -2.682942 | -0.698585 | 2.548103  |
| C | -5.302834 | -0.715346 | 0.640330  | H | -4.240968 | -1.234236 | 3.216494  |
| C | -5.651444 | -1.097903 | -0.657199 | H | -3.264665 | -0.053426 | 4.096206  |
| H | -5.601397 | -0.522520 | -2.720122 | C | 2.904199  | 0.762107  | -3.469288 |
| H | -5.576215 | -1.368463 | 1.464171  | H | 2.014704  | 1.395923  | -3.412009 |
| C | 3.330978  | 1.835355  | -1.159469 | C | 2.418418  | -0.655434 | -3.822170 |
| C | 4.054662  | 1.882184  | 0.055161  | H | 1.840986  | -0.626667 | -4.754025 |
| C | 3.618767  | 0.834403  | -2.119001 | H | 1.771806  | -1.047063 | -3.034087 |
| C | 5.049501  | 0.926307  | 0.290542  | H | 3.252329  | -1.350112 | -3.979202 |
| C | 4.622987  | -0.099533 | -1.836021 | C | 3.805356  | 1.316275  | -4.592780 |
| C | 5.347116  | -0.074577 | -0.639188 | H | 4.716254  | 0.713814  | -4.697755 |
| H | 5.616761  | 0.962344  | 1.216708  | H | 4.111109  | 2.349788  | -4.396031 |
| H | 4.853766  | -0.870470 | -2.565319 | H | 3.277253  | 1.297080  | -5.553846 |
| O | -1.550057 | 1.496041  | -1.075652 | C | 3.815892  | 2.964176  | 1.107068  |
| O | 0.734994  | 1.788199  | 0.017656  | H | 2.971928  | 3.577107  | 0.778138  |
| P | -0.373704 | 0.619800  | -0.330108 | C | 3.433229  | 2.367219  | 2.473760  |
| O | -0.818727 | 0.074282  | 1.002424  | H | 4.251396  | 1.774783  | 2.901047  |
| C | -4.322928 | 1.838857  | -2.708624 | H | 2.554215  | 1.722462  | 2.382487  |
| H | -3.715119 | 2.683861  | -2.374342 | H | 3.193621  | 3.164525  | 3.187170  |
| C | -5.632114 | 2.426236  | -3.274894 | C | 5.033194  | 3.902253  | 1.228662  |
| H | -6.180356 | 2.987648  | -2.509718 | H | 5.274357  | 4.365391  | 0.265165  |
| H | -6.295599 | 1.637829  | -3.649788 | H | 5.923743  | 3.361861  | 1.571197  |
| H | -5.417329 | 3.106392  | -4.108126 | H | 4.830548  | 4.703494  | 1.949847  |
| C | -3.522969 | 1.109938  | -3.805242 | O | 0.132730  | -0.337511 | -1.386513 |
| H | -2.579882 | 0.722341  | -3.409281 | S | 0.748943  | -3.016317 | 3.151426  |
| H | -3.292765 | 1.800468  | -4.625651 | O | -0.381734 | -2.817592 | -1.202116 |
| H | -4.088864 | 0.272328  | -4.229842 | H | -1.286979 | -2.137859 | 0.609269  |
| C | -4.258830 | 0.792763  | 2.359391  | H | 1.153223  | -2.100488 | 0.395886  |
| H | -3.553921 | 1.628306  | 2.364806  | C | 1.529096  | -4.268640 | 0.149804  |
| C | -5.522040 | 1.243662  | 3.121650  | C | 0.781331  | -5.611809 | 0.100806  |
| H | -5.993588 | 2.112156  | 2.647589  | C | 2.464357  | -4.093058 | -1.077466 |
| H | -5.273207 | 1.514514  | 4.155052  | H | 2.186514  | -4.265822 | 1.033004  |
| H | -6.268559 | 0.440794  | 3.154900  | C | 1.765760  | -6.785739 | -0.031147 |

|   |           |           |           |   |                                               |           |           |
|---|-----------|-----------|-----------|---|-----------------------------------------------|-----------|-----------|
| H | 0.097744  | -5.611660 | -0.759585 | H | 5.668009                                      | -4.917957 | 3.297149  |
| H | 0.167892  | -5.736637 | 1.001923  | C | -6.334518                                     | -2.404044 | -0.914578 |
| C | 3.438495  | -5.274743 | -1.194684 | C | -7.714811                                     | -2.556247 | -0.645317 |
| H | 1.843471  | -4.022721 | -1.978415 | C | -5.584263                                     | -3.492220 | -1.422756 |
| H | 3.017575  | -3.150316 | -0.992083 | C | -8.525158                                     | -1.483363 | -0.149963 |
| C | 2.694302  | -6.617564 | -1.243006 | C | -8.355373                                     | -3.829958 | -0.886528 |
| H | 1.207718  | -7.727358 | -0.103654 | C | -6.236104                                     | -4.759881 | -1.664479 |
| H | 2.371481  | -6.850996 | 0.884456  | C | -4.180824                                     | -3.400075 | -1.700622 |
| H | 4.056575  | -5.148391 | -2.092074 | C | -9.861373                                     | -1.658000 | 0.101174  |
| H | 4.125215  | -5.264244 | -0.336748 | H | -8.060602                                     | -0.518595 | 0.022111  |
| H | 3.411074  | -7.447126 | -1.286225 | C | -9.751794                                     | -3.969215 | -0.608612 |
| H | 2.098035  | -6.669508 | -2.165981 | C | -7.600548                                     | -4.894454 | -1.388938 |
| C | 6.410072  | -1.091907 | -0.368181 | C | -5.466041                                     | -5.851086 | -2.177851 |
| C | 7.624054  | -1.058683 | -1.097768 | H | -3.673386                                     | -2.458257 | -1.523897 |
| C | 6.198069  | -2.095779 | 0.609132  | C | -3.477835                                     | -4.470238 | -2.192180 |
| C | 7.913220  | -0.046370 | -2.070514 | C | -10.485691                                    | -2.918314 | -0.127134 |
| C | 8.635983  | -2.062208 | -0.853129 | H | -10.454781                                    | -0.827819 | 0.475122  |
| C | 7.220464  | -3.090328 | 0.848358  | H | -10.219061                                    | -4.934093 | -0.791834 |
| C | 4.989454  | -2.188893 | 1.375154  | H | -8.086980                                     | -5.850913 | -1.570470 |
| C | 9.097520  | -0.038270 | -2.761029 | C | -4.128298                                     | -5.714440 | -2.436798 |
| H | 7.175385  | 0.726790  | -2.252893 | H | -5.971859                                     | -6.796847 | -2.358538 |
| C | 9.855712  | -2.019718 | -1.599413 | H | -2.416217                                     | -4.362886 | -2.399139 |
| C | 8.406889  | -3.048976 | 0.110271  | H | -11.545956                                    | -3.038328 | 0.078813  |
| C | 6.992595  | -4.102098 | 1.834131  | H | -3.557850                                     | -6.552112 | -2.829384 |
| H | 4.209621  | -1.453801 | 1.208938  |   |                                               |           |           |
| C | 4.809590  | -3.173854 | 2.313737  |   | <b>TS1-S-cyclohexyl-iPr E= -3771.45532489</b> |           |           |
| C | 10.082568 | -1.040779 | -2.529181 | H | 1.154971                                      | -1.884361 | -2.122182 |
| H | 9.291860  | 0.742915  | -3.491149 | C | -0.781063                                     | -0.058521 | 3.546561  |
| H | 10.603373 | -2.785621 | -1.406437 | C | -0.082894                                     | -1.206839 | 3.936244  |
| H | 9.171549  | -3.801727 | 0.291864  | C | -0.116542                                     | -1.662699 | 5.263920  |
| C | 5.825551  | -4.145466 | 2.549105  | C | -0.852647                                     | -0.934399 | 6.199146  |
| H | 7.774067  | -4.839427 | 2.003422  | C | -1.551304                                     | 0.215900  | 5.824564  |
| H | 3.884508  | -3.213143 | 2.883496  | C | -1.516323                                     | 0.649109  | 4.497175  |
| H | 11.014224 | -1.019625 | -3.088158 | H | -0.742273                                     | 0.267119  | 2.513401  |

|   |           |           |           |   |           |           |           |
|---|-----------|-----------|-----------|---|-----------|-----------|-----------|
| H | -0.880672 | -1.276954 | 7.231120  | C | -4.311843 | 2.159770  | 1.372633  |
| H | -2.119627 | 0.770032  | 6.566170  | C | -3.720999 | 0.289283  | -0.096313 |
| H | -2.057811 | 1.540928  | 4.195072  | C | -3.668879 | 4.579337  | 2.649528  |
| C | 0.625121  | -2.936891 | 5.586747  | H | -1.873256 | 4.570796  | 1.493429  |
| H | 0.893056  | -2.975672 | 6.648185  | C | -5.193512 | 2.735284  | 2.327535  |
| H | -0.022046 | -3.805403 | 5.392579  | C | -4.607221 | 0.917509  | 0.754451  |
| C | 1.887839  | -3.044491 | 4.720912  | C | -4.883753 | 3.920529  | 2.954606  |
| H | 2.600653  | -2.256440 | 5.007757  | H | -3.414705 | 5.504187  | 3.160448  |
| H | 2.394638  | -4.001514 | 4.854347  | H | -6.115611 | 2.209490  | 2.563800  |
| C | 1.584861  | -2.845986 | 3.246514  | H | -5.555978 | 0.437411  | 0.978900  |
| N | 0.650865  | -1.937223 | 2.962425  | H | -5.562197 | 4.346536  | 3.688710  |
| H | 0.417910  | -1.723548 | 1.975430  | C | -4.059076 | -1.032748 | -0.721567 |
| C | 1.209505  | -3.573203 | -1.005950 | C | -4.364816 | -1.099926 | -2.104488 |
| C | 2.486132  | -2.995425 | -0.591685 | C | -4.130990 | -2.203286 | 0.070058  |
| H | 1.180259  | -4.641886 | -1.204580 | C | -4.731484 | -2.329522 | -2.659234 |
| C | 0.235142  | 2.419001  | -0.400559 | C | -4.511044 | -3.406632 | -0.538959 |
| C | -1.030247 | 2.986356  | -0.470859 | C | -4.812525 | -3.498423 | -1.897177 |
| C | -1.169505 | 4.273041  | -1.101823 | H | -4.968361 | -2.372099 | -3.719528 |
| C | 0.011455  | 4.979591  | -1.499248 | H | -4.570587 | -4.307193 | 0.068097  |
| C | 1.280883  | 4.380431  | -1.299517 | C | 2.790300  | 2.507795  | -0.624373 |
| C | 1.422718  | 3.106182  | -0.790243 | C | 3.389889  | 2.470139  | 0.657781  |
| H | -3.338026 | 4.336319  | -1.134507 | C | 3.513832  | 2.056439  | -1.753108 |
| C | -2.429568 | 4.870300  | -1.386742 | C | 4.699561  | 1.996712  | 0.782345  |
| C | -0.107650 | 6.259971  | -2.104530 | C | 4.824609  | 1.593242  | -1.570341 |
| H | 2.169937  | 4.939668  | -1.578853 | C | 5.441069  | 1.557922  | -0.318367 |
| C | -1.342041 | 6.818153  | -2.343829 | H | 5.158246  | 1.984489  | 1.768086  |
| C | -2.512439 | 6.105697  | -1.991566 | H | 5.390379  | 1.259686  | -2.437410 |
| H | 0.801564  | 6.784429  | -2.388964 | O | -1.602610 | 0.343622  | -1.235336 |
| H | -1.421660 | 7.794511  | -2.813911 | O | 0.376206  | 1.159996  | 0.159999  |
| H | -3.488034 | 6.534060  | -2.205303 | P | -0.169069 | -0.186545 | -0.624749 |
| C | -2.217364 | 2.253582  | 0.060880  | O | -0.342202 | -1.228554 | 0.448666  |
| C | -3.098506 | 2.842528  | 1.034175  | C | -4.351719 | 0.129512  | -3.013282 |
| C | -2.501594 | 0.970664  | -0.388948 | H | -4.026859 | 0.990147  | -2.422715 |
| C | -2.802843 | 4.057955  | 1.712383  | C | -5.767157 | 0.456924  | -3.530624 |

|   |           |           |           |   |          |           |           |
|---|-----------|-----------|-----------|---|----------|-----------|-----------|
| H | -6.467008 | 0.609465  | -2.701063 | H | 4.645919 | 3.075454  | -4.116052 |
| H | -6.164483 | -0.350312 | -4.157460 | H | 3.417018 | 4.202713  | -3.525441 |
| H | -5.751593 | 1.371503  | -4.135990 | H | 3.120704 | 3.263067  | -4.999965 |
| C | -3.353815 | -0.021401 | -4.177263 | C | 6.883913 | 1.090054  | -0.171367 |
| H | -2.344429 | -0.214610 | -3.802671 | H | 7.207310 | 0.725055  | -1.156148 |
| H | -3.326926 | 0.897313  | -4.776087 | C | 7.815388 | 2.255957  | 0.215367  |
| H | -3.635649 | -0.843237 | -4.846564 | H | 8.858892 | 1.921200  | 0.264051  |
| C | -5.218851 | -4.829129 | -2.517315 | H | 7.548421 | 2.665165  | 1.197147  |
| H | -5.187676 | -5.580474 | -1.716019 | H | 7.751152 | 3.070981  | -0.513802 |
| C | -6.661284 | -4.793268 | -3.057564 | C | 7.026997 | -0.077214 | 0.822771  |
| H | -6.955103 | -5.776375 | -3.445362 | H | 8.065303 | -0.428595 | 0.859053  |
| H | -6.762008 | -4.069244 | -3.874866 | H | 6.390725 | -0.922709 | 0.538068  |
| H | -7.370569 | -4.509549 | -2.272226 | H | 6.744207 | 0.223484  | 1.838472  |
| C | -4.230904 | -5.280402 | -3.609715 | C | 2.673303 | 2.975155  | 1.909577  |
| H | -3.209786 | -5.342950 | -3.217714 | H | 1.645155 | 3.227418  | 1.636250  |
| H | -4.220869 | -4.579189 | -4.452577 | C | 2.594456 | 1.899085  | 3.007989  |
| H | -4.509183 | -6.266865 | -4.000394 | H | 3.588009 | 1.628639  | 3.385422  |
| C | -3.818115 | -2.214963 | 1.566600  | H | 2.115834 | 0.991129  | 2.628708  |
| H | -3.394319 | -1.243146 | 1.832976  | H | 2.005469 | 2.263282  | 3.858156  |
| C | -5.096281 | -2.411930 | 2.406760  | C | 3.325412 | 4.266982  | 2.441874  |
| H | -5.842294 | -1.637255 | 2.196463  | H | 3.329633 | 5.051718  | 1.677043  |
| H | -4.861520 | -2.374656 | 3.477616  | H | 4.364059 | 4.094131  | 2.748497  |
| H | -5.562505 | -3.382957 | 2.199179  | H | 2.777072 | 4.644222  | 3.313827  |
| C | -2.761419 | -3.273253 | 1.934017  | O | 0.684842 | -0.501035 | -1.833257 |
| H | -1.848009 | -3.117481 | 1.354116  | S | 2.453650 | -3.723755 | 2.090272  |
| H | -3.120594 | -4.293484 | 1.753899  | O | 1.557656 | -2.843266 | -2.209794 |
| H | -2.510476 | -3.196217 | 2.998999  | H | 0.323879 | -3.189926 | -0.503809 |
| C | 2.934630  | 2.088342  | -3.168466 | H | 2.434234 | -1.974411 | -0.230576 |
| H | 1.862770  | 2.289764  | -3.087967 | C | 3.844948 | -3.559908 | -0.884269 |
| C | 3.077941  | 0.743288  | -3.903890 | C | 3.847707 | -5.017198 | -1.378032 |
| H | 2.583324  | 0.799610  | -4.881162 | C | 4.637026 | -2.636790 | -1.847858 |
| H | 2.606659  | -0.059387 | -3.332496 | H | 4.369876 | -3.523118 | 0.082552  |
| H | 4.127798  | 0.482468  | -4.084981 | C | 5.282516 | -5.525819 | -1.593168 |
| C | 3.565572  | 3.225644  | -3.998107 | H | 3.294749 | -5.075665 | -2.325728 |

|                                              |           |           |           |   |           |           |           |
|----------------------------------------------|-----------|-----------|-----------|---|-----------|-----------|-----------|
| H                                            | 3.327736  | -5.660788 | -0.657385 | C | 1.769413  | -3.224607 | 0.012056  |
| C                                            | 6.067220  | -3.158423 | -2.053269 | H | 0.194862  | -4.694841 | -0.380560 |
| H                                            | 4.108328  | -2.603130 | -2.807431 | C | 0.559962  | 2.493287  | -0.734897 |
| H                                            | 4.652602  | -1.611532 | -1.458060 | C | -0.588783 | 3.266692  | -0.836941 |
| C                                            | 6.073463  | -4.614366 | -2.543232 | C | -0.543197 | 4.453621  | -1.651863 |
| H                                            | 5.255321  | -6.551272 | -1.981696 | C | 0.712901  | 4.868677  | -2.201980 |
| H                                            | 5.796731  | -5.573675 | -0.622112 | C | 1.867737  | 4.077784  | -1.974988 |
| H                                            | 6.592000  | -2.512784 | -2.768439 | C | 1.816601  | 2.884493  | -1.285713 |
| H                                            | 6.620938  | -3.090175 | -1.105249 | H | -2.664539 | 4.906153  | -1.606487 |
| H                                            | 7.104091  | -4.976886 | -2.644307 | C | -1.695867 | 5.224204  | -1.972923 |
| H                                            | 5.624459  | -4.659606 | -3.546170 | C | 0.778210  | 6.051506  | -2.987298 |
|                                              |           |           |           | H | 2.817828  | 4.415076  | -2.380993 |
|                                              |           |           |           | C | -0.353054 | 6.786467  | -3.256731 |
|                                              |           |           |           | C | -1.603106 | 6.355830  | -2.753682 |
|                                              |           |           |           | H | 1.743458  | 6.355782  | -3.385283 |
|                                              |           |           |           | H | -0.292602 | 7.684763  | -3.864955 |
|                                              |           |           |           | H | -2.501541 | 6.919803  | -2.989645 |
|                                              |           |           |           | C | -1.848995 | 2.846262  | -0.154957 |
|                                              |           |           |           | C | -2.556582 | 3.722278  | 0.740932  |
|                                              |           |           |           | C | -2.377974 | 1.583166  | -0.389331 |
|                                              |           |           |           | C | -2.015393 | 4.950919  | 1.211891  |
|                                              |           |           |           | C | -3.849192 | 3.328533  | 1.217854  |
|                                              |           |           |           | C | -3.678998 | 1.184794  | 0.043348  |
|                                              |           |           |           | C | -2.722321 | 5.754062  | 2.080629  |
|                                              |           |           |           | H | -1.024003 | 5.247484  | 0.889330  |
|                                              |           |           |           | C | -4.560972 | 4.189351  | 2.097398  |
|                                              |           |           |           | C | -4.392421 | 2.082913  | 0.810704  |
|                                              |           |           |           | C | -4.013802 | 5.378829  | 2.521542  |
|                                              |           |           |           | H | -2.281899 | 6.682973  | 2.432839  |
|                                              |           |           |           | H | -5.545805 | 3.880484  | 2.439839  |
|                                              |           |           |           | H | -5.396045 | 1.822267  | 1.136334  |
|                                              |           |           |           | H | -4.564508 | 6.025062  | 3.199569  |
|                                              |           |           |           | C | -4.274847 | -0.134592 | -0.351533 |
|                                              |           |           |           | C | -4.622436 | -0.375997 | -1.704683 |
| <b>TS1-S-cyclohexyl-Ph E= -3997.67215499</b> |           |           |           |   |           |           |           |
| H                                            | 0.634912  | -2.143135 | -1.699904 |   |           |           |           |
| C                                            | -0.804805 | 0.866798  | 3.605093  |   |           |           |           |
| C                                            | 0.062582  | -0.098194 | 4.128904  |   |           |           |           |
| C                                            | 0.567010  | 0.010420  | 5.434873  |   |           |           |           |
| C                                            | 0.164325  | 1.094543  | 6.215410  |   |           |           |           |
| C                                            | -0.708873 | 2.059949  | 5.708204  |   |           |           |           |
| C                                            | -1.186745 | 1.946389  | 4.400679  |   |           |           |           |
| H                                            | -1.157792 | 0.765875  | 2.584955  |   |           |           |           |
| H                                            | 0.544912  | 1.184011  | 7.230456  |   |           |           |           |
| H                                            | -1.010843 | 2.897624  | 6.330433  |   |           |           |           |
| H                                            | -1.857921 | 2.697230  | 3.993964  |   |           |           |           |
| C                                            | 1.550504  | -1.036259 | 5.899146  |   |           |           |           |
| H                                            | 2.571304  | -0.738521 | 5.615570  |   |           |           |           |
| H                                            | 1.541884  | -1.124248 | 6.991037  |   |           |           |           |
| C                                            | 1.222821  | -2.392806 | 5.261246  |   |           |           |           |
| H                                            | 1.979753  | -3.144177 | 5.490674  |   |           |           |           |
| H                                            | 0.265196  | -2.764292 | 5.656968  |   |           |           |           |
| C                                            | 1.060036  | -2.293155 | 3.755091  |   |           |           |           |
| N                                            | 0.467124  | -1.184220 | 3.307017  |   |           |           |           |
| H                                            | 0.209884  | -1.108247 | 2.306336  |   |           |           |           |
| C                                            | 0.409937  | -3.629674 | -0.339439 |   |           |           |           |

|   |           |           |           |   |           |           |           |
|---|-----------|-----------|-----------|---|-----------|-----------|-----------|
| C | -4.543744 | -1.122671 | 0.628148  | C | -3.267574 | -2.078642 | 2.613209  |
| C | -5.222305 | -1.591007 | -2.045251 | H | -2.360004 | -2.131641 | 2.006062  |
| C | -5.152498 | -2.319016 | 0.234454  | H | -3.762582 | -3.056600 | 2.586490  |
| C | -5.499439 | -2.580562 | -1.094934 | H | -2.976508 | -1.884710 | 3.652930  |
| H | -5.516374 | -1.761249 | -3.076968 | C | 2.889868  | 1.274351  | -3.568160 |
| H | -5.334377 | -3.086154 | 0.981543  | H | 1.894120  | 1.713951  | -3.462070 |
| C | 3.050485  | 2.048499  | -1.108243 | C | 2.687697  | -0.150742 | -4.114924 |
| C | 3.729395  | 2.047146  | 0.133343  | H | 2.133661  | -0.109171 | -5.060494 |
| C | 3.562358  | 1.297467  | -2.194378 | H | 2.111337  | -0.753715 | -3.409968 |
| C | 4.898149  | 1.292833  | 0.268591  | H | 3.640507  | -0.654497 | -4.319173 |
| C | 4.739121  | 0.563540  | -2.009841 | C | 3.677056  | 2.134130  | -4.578682 |
| C | 5.423141  | 0.539205  | -0.788175 | H | 4.685381  | 1.731589  | -4.736703 |
| H | 5.435858  | 1.318039  | 1.212213  | H | 3.784176  | 3.168911  | -4.235123 |
| H | 5.121290  | -0.031258 | -2.833905 | H | 3.166543  | 2.150566  | -5.549269 |
| O | -1.653515 | 0.683933  | -1.152390 | C | 3.256556  | 2.882989  | 1.322027  |
| O | 0.525864  | 1.327993  | 0.011134  | H | 2.303938  | 3.347508  | 1.053108  |
| P | -0.302313 | -0.000805 | -0.506788 | C | 2.999988  | 2.020914  | 2.571535  |
| O | -0.591971 | -0.798978 | 0.738026  | H | 3.923337  | 1.558536  | 2.941574  |
| C | -4.419998 | 0.660503  | -2.810302 | H | 2.281970  | 1.225354  | 2.352283  |
| H | -3.921556 | 1.531882  | -2.378170 | H | 2.588729  | 2.634234  | 3.381952  |
| C | -5.771514 | 1.153316  | -3.366303 | C | 4.244823  | 4.026391  | 1.626594  |
| H | -6.399975 | 1.570092  | -2.570941 | H | 4.386807  | 4.670375  | 0.751389  |
| H | -6.332427 | 0.340428  | -3.842529 | H | 5.228342  | 3.639033  | 1.918542  |
| H | -5.613127 | 1.934744  | -4.119515 | H | 3.872157  | 4.648074  | 2.449882  |
| C | -3.511694 | 0.133307  | -3.937324 | O | 0.393976  | -0.669627 | -1.670424 |
| H | -2.541930 | -0.181351 | -3.541224 | S | 1.570405  | -3.569088 | 2.770543  |
| H | -3.338561 | 0.918780  | -4.683117 | O | 0.869041  | -3.155815 | -1.630172 |
| H | -3.965987 | -0.719263 | -4.456598 | H | -0.392456 | -3.031707 | 0.087167  |
| C | -4.188436 | -0.952863 | 2.105792  | H | 1.892495  | -2.168688 | 0.225436  |
| H | -3.634306 | -0.017531 | 2.217141  | C | 3.013325  | -4.041429 | -0.169531 |
| C | -5.453760 | -0.845407 | 2.980634  | C | 2.773647  | -5.536620 | -0.440632 |
| H | -6.098178 | -0.018639 | 2.660219  | C | 3.940885  | -3.415143 | -1.245115 |
| H | -5.182113 | -0.676626 | 4.029846  | H | 3.543406  | -3.944834 | 0.790279  |
| H | -6.050132 | -1.764773 | 2.933859  | C | 4.105201  | -6.298304 | -0.547091 |

|   |           |           |           |                                               |  |  |
|---|-----------|-----------|-----------|-----------------------------------------------|--|--|
| H | 2.215498  | -5.645818 | -1.380885 |                                               |  |  |
| H | 2.157053  | -5.972085 | 0.355851  |                                               |  |  |
| C | 5.265703  | -4.186692 | -1.340694 |                                               |  |  |
| H | 3.418004  | -3.441858 | -2.208283 |                                               |  |  |
| H | 4.129238  | -2.360467 | -1.012771 |                                               |  |  |
| C | 5.031190  | -5.681176 | -1.605966 |                                               |  |  |
| H | 3.908801  | -7.352733 | -0.777325 |                                               |  |  |
| H | 4.607913  | -6.280546 | 0.431033  |                                               |  |  |
| H | 5.885349  | -3.748063 | -2.132076 |                                               |  |  |
| H | 5.828481  | -4.060947 | -0.404850 |                                               |  |  |
| H | 5.988001  | -6.217745 | -1.629340 |                                               |  |  |
| H | 4.576743  | -5.805698 | -2.599870 |                                               |  |  |
| C | 6.665155  | -0.259464 | -0.618767 |                                               |  |  |
| C | 7.607871  | -0.364364 | -1.656523 |                                               |  |  |
| C | 6.931708  | -0.935456 | 0.585217  |                                               |  |  |
| C | 8.770918  | -1.117626 | -1.498195 |                                               |  |  |
| H | 7.437840  | 0.171777  | -2.585954 |                                               |  |  |
| C | 8.095758  | -1.687395 | 0.745489  |                                               |  |  |
| H | 6.208378  | -0.885950 | 1.394497  |                                               |  |  |
| C | 9.020963  | -1.783173 | -0.296219 |                                               |  |  |
| H | 9.488351  | -1.175918 | -2.312744 |                                               |  |  |
| H | 8.276911  | -2.204257 | 1.684550  |                                               |  |  |
| H | 9.927903  | -2.368704 | -0.171935 |                                               |  |  |
| C | -6.141489 | -3.862212 | -1.484792 |                                               |  |  |
| C | -5.809828 | -4.498806 | -2.693378 |                                               |  |  |
| C | -7.098488 | -4.473748 | -0.656416 |                                               |  |  |
| C | -6.412859 | -5.701362 | -3.060742 |                                               |  |  |
| H | -5.053977 | -4.057041 | -3.336752 |                                               |  |  |
| C | -7.701052 | -5.676948 | -1.022111 |                                               |  |  |
| H | -7.389589 | -3.986344 | 0.269954  |                                               |  |  |
| C | -7.361501 | -6.296696 | -2.226583 |                                               |  |  |
| H | -6.134332 | -6.178393 | -3.996967 |                                               |  |  |
| H | -8.444462 | -6.126485 | -0.368648 |                                               |  |  |
| H | -7.831632 | -7.233893 | -2.512315 |                                               |  |  |
|   |           |           |           | <b>TS1-S-cyclohexyl-tBu E= -3850.06512782</b> |  |  |
| H | 0.860296  | -2.088523 | -1.954253 |                                               |  |  |
| C | -0.800463 | 0.360187  | 3.575062  |                                               |  |  |
| C | -0.230878 | -0.828090 | 4.045722  |                                               |  |  |
| C | -0.289286 | -1.173913 | 5.405489  |                                               |  |  |
| C | -0.917928 | -0.295762 | 6.288872  |                                               |  |  |
| C | -1.487862 | 0.895453  | 5.833016  |                                               |  |  |
| C | -1.430458 | 1.218948  | 4.475430  |                                               |  |  |
| H | -0.742798 | 0.600177  | 2.519536  |                                               |  |  |
| H | -0.963614 | -0.552315 | 7.344914  |                                               |  |  |
| H | -1.973575 | 1.566923  | 6.535345  |                                               |  |  |
| H | -1.871432 | 2.142099  | 4.110715  |                                               |  |  |
| C | 0.310518  | -2.495931 | 5.819112  |                                               |  |  |
| H | 0.594743  | -2.482744 | 6.876937  |                                               |  |  |
| H | -0.434345 | -3.297513 | 5.702545  |                                               |  |  |
| C | 1.534429  | -2.812539 | 4.949375  |                                               |  |  |
| H | 2.336314  | -2.089733 | 5.163687  |                                               |  |  |
| H | 1.934066  | -3.807225 | 5.152823  |                                               |  |  |
| C | 1.225192  | -2.696128 | 3.467721  |                                               |  |  |
| N | 0.395049  | -1.710437 | 3.123546  |                                               |  |  |
| H | 0.172347  | -1.543537 | 2.124959  |                                               |  |  |
| C | 0.706194  | -3.682103 | -0.716388 |                                               |  |  |
| C | 2.055209  | -3.251324 | -0.356870 |                                               |  |  |
| H | 0.532885  | -4.749150 | -0.833708 |                                               |  |  |
| C | 0.498085  | 2.426070  | -0.491063 |                                               |  |  |
| C | -0.696452 | 3.129439  | -0.580322 |                                               |  |  |
| C | -0.694495 | 4.398838  | -1.259770 |                                               |  |  |
| C | 0.555339  | 4.954578  | -1.684227 |                                               |  |  |
| C | 1.750644  | 4.224960  | -1.464515 |                                               |  |  |
| C | 1.752211  | 2.962314  | -0.908326 |                                               |  |  |
| H | -2.842586 | 4.701707  | -1.292339 |                                               |  |  |
| C | -1.881760 | 5.122238  | -1.564262 |                                               |  |  |
| C | 0.576336  | 6.218546  | -2.334109 |                                               |  |  |



|   |           |           |           |   |           |           |           |
|---|-----------|-----------|-----------|---|-----------|-----------|-----------|
| H | 2.694771  | 4.671108  | -1.766194 | C | 5.601898  | 1.015275  | -0.411490 |
| C | -0.589408 | 6.902523  | -2.590242 | H | 5.361718  | 1.527525  | 1.663333  |
| C | -1.830002 | 6.337663  | -2.211454 | H | 5.474580  | 0.672413  | -2.529178 |
| H | 1.536680  | 6.628348  | -2.638184 | O | -1.570969 | 0.540302  | -1.226583 |
| H | -0.562266 | 7.865006  | -3.093730 | O | 0.505194  | 1.183742  | 0.120369  |
| H | -2.753004 | 6.864403  | -2.438504 | P | -0.215184 | -0.128692 | -0.576243 |
| C | -1.955912 | 2.561162  | -0.015160 | O | -0.520732 | -1.063861 | 0.563765  |
| C | -2.757263 | 3.289114  | 0.932838  | C | -4.321943 | 0.556048  | -2.999815 |
| C | -2.389881 | 1.302441  | -0.409732 | H | -3.895650 | 1.399733  | -2.450745 |
| C | -2.317257 | 4.487624  | 1.561515  | C | -5.690743 | 1.022222  | -3.535424 |
| C | -4.041122 | 2.768596  | 1.297870  | H | -6.365997 | 1.294111  | -2.716080 |
| C | -3.678187 | 0.779770  | -0.087509 | H | -6.180755 | 0.238102  | -4.124873 |
| C | -3.112915 | 5.146068  | 2.474553  | H | -5.570321 | 1.899402  | -4.183020 |
| H | -1.334153 | 4.877673  | 1.323888  | C | -3.352200 | 0.235775  | -4.153368 |
| C | -4.846311 | 3.483907  | 2.225457  | H | -2.369515 | -0.051450 | -3.768016 |
| C | -4.481906 | 1.543736  | 0.733657  | H | -3.224476 | 1.115568  | -4.795845 |
| C | -4.396784 | 4.649404  | 2.803193  | H | -3.726982 | -0.580615 | -4.782841 |
| H | -2.749627 | 6.054435  | 2.947700  | C | -5.752715 | -4.243441 | -2.344168 |
| H | -5.823488 | 3.081081  | 2.481380  | C | -7.146318 | -3.964840 | -2.956317 |
| H | -5.479037 | 1.187570  | 0.978350  | H | -7.553696 | -4.875886 | -3.412605 |
| H | -5.018329 | 5.183017  | 3.517067  | H | -7.102736 | -3.193641 | -3.732382 |
| C | -4.167146 | -0.521020 | -0.653355 | H | -7.850264 | -3.625118 | -2.187771 |
| C | -4.476167 | -0.618941 | -2.033259 | C | -4.796159 | -4.736774 | -3.455984 |
| C | -4.375029 | -1.639254 | 0.184987  | H | -3.802395 | -4.955414 | -3.048435 |
| C | -4.978382 | -1.822874 | -2.531452 | H | -4.673489 | -3.992406 | -4.249457 |
| C | -4.887394 | -2.821501 | -0.370341 | H | -5.185344 | -5.654054 | -3.915503 |
| C | -5.195823 | -2.947620 | -1.725398 | C | -4.070990 | -1.621474 | 1.684025  |
| H | -5.214138 | -1.878388 | -3.590655 | H | -3.544048 | -0.691449 | 1.913151  |
| H | -5.042032 | -3.665480 | 0.291997  | C | -5.366688 | -1.642712 | 2.519690  |
| C | 3.046838  | 2.223273  | -0.728214 | H | -6.022280 | -0.800632 | 2.270884  |
| C | 3.651081  | 2.156281  | 0.550357  | H | -5.135492 | -1.587560 | 3.590554  |
| C | 3.712757  | 1.666674  | -1.842389 | H | -5.934849 | -2.564706 | 2.346044  |
| C | 4.906103  | 1.556740  | 0.677401  | C | -3.136910 | -2.771294 | 2.105553  |
| C | 4.974058  | 1.078709  | -1.657541 | H | -2.207165 | -2.736649 | 1.531945  |

|   |           |           |           |                                                |           |           |           |
|---|-----------|-----------|-----------|------------------------------------------------|-----------|-----------|-----------|
| H | -3.600770 | -3.754280 | 1.960611  | H                                              | -0.112068 | -3.148256 | -0.237952 |
| H | -2.888234 | -2.679381 | 3.169970  | H                                              | 2.147925  | -2.207835 | -0.078302 |
| C | 3.127754  | 1.706896  | -3.255385 | C                                              | 3.320786  | -4.015422 | -0.608671 |
| H | 2.096179  | 2.062391  | -3.182100 | C                                              | 3.121256  | -5.500383 | -0.958227 |
| C | 3.070078  | 0.315490  | -3.913291 | C                                              | 4.203762  | -3.301547 | -1.667263 |
| H | 2.594741  | 0.388515  | -4.899124 | H                                              | 3.869755  | -3.955385 | 0.343734  |
| H | 2.479941  | -0.372195 | -3.302975 | C                                              | 4.471423  | -6.213184 | -1.138093 |
| H | 4.069703  | -0.110228 | -4.063537 | H                                              | 2.544203  | -5.576333 | -1.890383 |
| C | 3.898954  | 2.700118  | -4.148301 | H                                              | 2.537555  | -5.997252 | -0.173218 |
| H | 4.945787  | 2.395277  | -4.268987 | C                                              | 5.547587  | -4.026402 | -1.837781 |
| H | 3.895497  | 3.710462  | -3.724306 | H                                              | 3.659804  | -3.288330 | -2.618827 |
| H | 3.447539  | 2.750151  | -5.146657 | H                                              | 4.363085  | -2.255178 | -1.378523 |
| C | 7.004561  | 0.412394  | -0.205183 | C                                              | 5.350732  | -5.510118 | -2.182776 |
| C | 7.956460  | 1.509014  | 0.331332  | H                                              | 4.300872  | -7.258515 | -1.423485 |
| H | 8.962140  | 1.099685  | 0.489655  | H                                              | 4.998792  | -6.235281 | -0.173212 |
| H | 7.607970  | 1.918311  | 1.285218  | H                                              | 6.134462  | -3.528011 | -2.619588 |
| H | 8.035209  | 2.339944  | -0.379092 | H                                              | 6.129733  | -3.941659 | -0.908319 |
| C | 6.932737  | -0.743145 | 0.820668  | H                                              | 6.322126  | -6.014117 | -2.260843 |
| H | 7.930021  | -1.168674 | 0.989000  | H                                              | 4.874110  | -5.590540 | -3.170599 |
| H | 6.278186  | -1.545903 | 0.461304  | C                                              | -5.902768 | -5.374307 | -1.308690 |
| H | 6.545905  | -0.407621 | 1.788394  | H                                              | -4.942249 | -5.637384 | -0.851032 |
| C | 2.999296  | 2.759852  | 1.794115  | H                                              | -6.600781 | -5.105238 | -0.507687 |
| H | 1.996843  | 3.101319  | 1.522164  | H                                              | -6.293411 | -6.273820 | -1.798436 |
| C | 2.829686  | 1.724135  | 2.920743  | C                                              | 7.606052  | -0.142291 | -1.510618 |
| H | 3.797028  | 1.371717  | 3.298894  | H                                              | 6.991564  | -0.944442 | -1.935345 |
| H | 2.265638  | 0.855403  | 2.567457  | H                                              | 7.720314  | 0.638532  | -2.270884 |
| H | 2.283947  | 2.162440  | 3.764670  | H                                              | 8.600609  | -0.558078 | -1.311758 |
| C | 3.776579  | 3.996662  | 2.287038  |                                                |           |           |           |
| H | 3.848882  | 4.757057  | 1.501295  |                                                |           |           |           |
| H | 4.796831  | 3.732771  | 2.590780  | <b>TS1-S-n-hexyl-anthryl E= -4613.33476277</b> |           |           |           |
| H | 3.275983  | 4.448365  | 3.152444  | H                                              | 0.630907  | -1.885376 | -0.886926 |
| O | 0.585083  | -0.635306 | -1.755702 | C                                              | -0.521882 | 2.265758  | 3.565816  |
| S | 1.963362  | -3.757266 | 2.376376  | C                                              | -0.096360 | 1.208330  | 4.377140  |
| O | 1.127000  | -3.096597 | -1.975018 | C                                              | 0.313555  | 1.427142  | 5.702460  |
|   |           |           |           | C                                              | 0.264398  | 2.726897  | 6.206733  |

|   |           |           |           |   |           |           |           |
|---|-----------|-----------|-----------|---|-----------|-----------|-----------|
| C | -0.169351 | 3.790256  | 5.411170  | C | -2.077088 | 4.491912  | 0.417309  |
| C | -0.556593 | 3.557677  | 4.089602  | C | -2.217607 | 2.220060  | -0.418266 |
| H | -0.810627 | 2.068901  | 2.538818  | C | -1.359154 | 5.683751  | 0.715954  |
| H | 0.573677  | 2.906287  | 7.234049  | C | -3.393262 | 4.343439  | 0.963073  |
| H | -0.202091 | 4.795455  | 5.821738  | C | -3.550994 | 2.069336  | 0.068499  |
| H | -0.888272 | 4.378822  | 3.461271  | C | -1.921665 | 6.680101  | 1.485352  |
| C | 0.820536  | 0.242154  | 6.488746  | H | -0.348649 | 5.798119  | 0.340322  |
| H | 1.899124  | 0.112795  | 6.312431  | C | -3.952399 | 5.398223  | 1.734415  |
| H | 0.697184  | 0.405667  | 7.564845  | C | -4.114283 | 3.145235  | 0.722681  |
| C | 0.081757  | -1.034282 | 6.064200  | C | -3.236475 | 6.545067  | 1.991645  |
| H | 0.502690  | -1.924156 | 6.534274  | H | -1.348901 | 7.576885  | 1.705995  |
| H | -0.972556 | -0.968998 | 6.374051  | H | -4.957444 | 5.273805  | 2.130441  |
| C | 0.081503  | -1.220189 | 4.558240  | H | -5.136690 | 3.070973  | 1.083531  |
| N | -0.048299 | -0.102415 | 3.835597  | H | -3.671955 | 7.341209  | 2.589110  |
| H | -0.207443 | -0.176381 | 2.817312  | C | -4.337875 | 0.816236  | -0.183612 |
| C | 0.069486  | -3.282102 | 0.508344  | C | -4.766201 | 0.514522  | -1.500800 |
| C | 1.196451  | -2.748000 | 1.267077  | C | -4.697600 | -0.036214 | 0.888034  |
| H | -0.061580 | -4.363462 | 0.483593  | C | -5.536709 | -0.632574 | -1.717043 |
| C | 0.776136  | 2.678666  | -1.028737 | C | -5.476817 | -1.168500 | 0.618550  |
| C | -0.263213 | 3.590698  | -1.155928 | C | -5.902898 | -1.487245 | -0.673177 |
| C | -0.125296 | 4.654979  | -2.117958 | H | -5.871861 | -0.867222 | -2.723569 |
| C | 1.127991  | 4.818948  | -2.792732 | H | -5.757082 | -1.828878 | 1.434373  |
| C | 2.168295  | 3.883219  | -2.566220 | C | 3.074749  | 1.740539  | -1.650091 |
| C | 2.007192  | 2.790374  | -1.740571 | C | 3.869359  | 1.612136  | -0.486751 |
| H | -2.157336 | 5.409476  | -2.007135 | C | 3.305435  | 0.891887  | -2.762099 |
| C | -1.184186 | 5.540998  | -2.464064 | C | 4.870234  | 0.634196  | -0.451662 |
| C | 1.294114  | 5.885024  | -3.718097 | C | 4.332176  | -0.055477 | -2.683928 |
| H | 3.106336  | 4.008802  | -3.101007 | C | 5.120021  | -0.211135 | -1.539762 |
| C | 0.257113  | 6.741927  | -4.005000 | H | 5.480873  | 0.529091  | 0.441052  |
| C | -0.997955 | 6.553338  | -3.380338 | H | 4.523327  | -0.700539 | -3.536591 |
| H | 2.257517  | 5.997465  | -4.209777 | O | -1.642887 | 1.124669  | -1.043128 |
| H | 0.392496  | 7.549047  | -4.719632 | O | 0.663811  | 1.653928  | -0.106459 |
| H | -1.827368 | 7.209616  | -3.629876 | P | -0.366391 | 0.385511  | -0.311343 |
| C | -1.521608 | 3.422600  | -0.370296 | O | -0.668751 | -0.108056 | 1.077616  |

|   |           |           |           |   |           |           |           |
|---|-----------|-----------|-----------|---|-----------|-----------|-----------|
| C | -4.462669 | 1.413894  | -2.699434 | H | 3.236186  | 2.460387  | 2.844937  |
| H | -3.838953 | 2.244014  | -2.358098 | H | 4.224252  | 1.098249  | 2.296100  |
| C | -5.754097 | 2.033044  | -3.271676 | C | 4.940584  | 3.442254  | 0.893992  |
| H | -6.297396 | 2.598620  | -2.506044 | H | 5.843028  | 2.854437  | 1.100895  |
| H | -6.431041 | 1.263684  | -3.661234 | H | 4.793876  | 4.134916  | 1.731662  |
| H | -5.516871 | 2.716634  | -4.095904 | H | 5.127493  | 4.035480  | -0.008455 |
| C | -3.669784 | 0.671947  | -3.792819 | O | 0.152330  | -0.601502 | -1.337823 |
| H | -3.426823 | 1.356864  | -4.614268 | S | 0.182801  | -2.764192 | 3.886282  |
| H | -4.246906 | -0.158997 | -4.215565 | O | 0.952568  | -2.838304 | -0.550812 |
| H | -2.733525 | 0.271422  | -3.392896 | H | -0.863745 | -2.725651 | 0.565320  |
| C | -4.275490 | 0.221889  | 2.334297  | H | 1.171577  | -1.678484 | 1.429546  |
| H | -3.568179 | 1.055754  | 2.337537  | C | 2.412127  | -3.554197 | 1.605900  |
| C | -5.481844 | 0.629440  | 3.204253  | C | 3.629386  | -2.707393 | 1.996558  |
| H | -5.982559 | 1.520709  | 2.809048  | C | 4.856778  | -3.562843 | 2.333844  |
| H | -5.160176 | 0.848507  | 4.229702  | H | 3.872121  | -2.027419 | 1.169887  |
| H | -6.226250 | -0.174585 | 3.250974  | H | 3.365618  | -2.079377 | 2.858679  |
| C | -3.545926 | -0.986785 | 2.949252  | C | 6.095839  | -2.728433 | 2.683414  |
| H | -2.674644 | -1.260697 | 2.348425  | H | 4.615443  | -4.231056 | 3.174211  |
| H | -4.199292 | -1.862967 | 3.032919  | H | 5.090347  | -4.212271 | 1.478698  |
| H | -3.199593 | -0.740686 | 3.960434  | H | 6.328912  | -2.061182 | 1.841342  |
| C | 2.484623  | 0.954858  | -4.051709 | H | 5.869195  | -2.076081 | 3.540337  |
| H | 1.674649  | 1.673682  | -3.905734 | C | 7.331194  | -3.579587 | 3.005666  |
| C | 1.823090  | -0.397179 | -4.383325 | H | 7.546506  | -4.234872 | 2.150195  |
| H | 1.200165  | -0.297281 | -5.280756 | H | 7.103842  | -4.244000 | 3.851833  |
| H | 1.186727  | -0.726686 | -3.557331 | C | 8.572826  | -2.741712 | 3.329119  |
| H | 2.566628  | -1.177724 | -4.586078 | H | 9.434508  | -3.377641 | 3.563637  |
| C | 3.337911  | 1.456230  | -5.234232 | H | 8.849614  | -2.104321 | 2.480642  |
| H | 3.772825  | 2.441425  | -5.029671 | H | 8.397327  | -2.088068 | 4.192821  |
| H | 2.725398  | 1.537666  | -6.140247 | H | 2.649126  | -4.184193 | 0.739538  |
| H | 4.163993  | 0.768198  | -5.450843 | H | 2.146712  | -4.240514 | 2.421166  |
| C | 3.704773  | 2.536287  | 0.719195  | C | -6.728306 | -2.709047 | -0.930095 |
| H | 2.851835  | 3.193396  | 0.528371  | C | -6.136152 | -3.849345 | -1.524526 |
| C | 3.398347  | 1.762584  | 2.014779  | C | -8.098708 | -2.723570 | -0.575420 |
| H | 2.493206  | 1.159018  | 1.900334  | C | -4.751760 | -3.896622 | -1.892431 |



|   |           |           |           |   |           |           |           |
|---|-----------|-----------|-----------|---|-----------|-----------|-----------|
| C | -1.211411 | 2.854439  | 0.655766  | C | -5.195998 | -2.702401 | -2.748806 |
| C | -1.464042 | 4.272076  | 0.619983  | H | -5.536071 | -0.943694 | -3.934228 |
| C | -0.371871 | 5.161916  | 0.360308  | H | -4.744184 | -4.224063 | -1.315083 |
| C | 0.911016  | 4.626604  | 0.083352  | C | 2.499599  | 2.758385  | -0.384589 |
| C | 1.142494  | 3.268807  | 0.003808  | C | 3.352512  | 2.183695  | 0.585392  |
| H | -3.607451 | 4.187847  | 0.946662  | C | 2.955738  | 2.918284  | -1.717294 |
| C | -2.756586 | 4.841272  | 0.796203  | C | 4.643218  | 1.794268  | 0.207330  |
| C | -0.597182 | 6.565311  | 0.350224  | C | 4.259934  | 2.522767  | -2.036067 |
| H | 1.731385  | 5.313724  | -0.107159 | C | 5.124346  | 1.961482  | -1.093061 |
| C | -1.855821 | 7.082211  | 0.552351  | H | 5.304949  | 1.364283  | 0.956716  |
| C | -2.946253 | 6.205715  | 0.762299  | H | 4.608303  | 2.661434  | -3.056053 |
| H | 0.247917  | 7.223517  | 0.162552  | O | -1.865566 | 0.665773  | -0.997841 |
| H | -2.017931 | 8.156454  | 0.535239  | O | 0.298892  | 1.037506  | 0.301986  |
| H | -3.945959 | 6.611594  | 0.891899  | P | -0.357282 | 0.030930  | -0.825057 |
| C | -2.293237 | 1.889577  | 1.013156  | O | -0.352701 | -1.333236 | -0.187797 |
| C | -3.026228 | 1.994526  | 2.247134  | C | -4.787275 | 1.078849  | -2.365392 |
| C | -2.638963 | 0.871602  | 0.132483  | H | -4.385574 | 1.644008  | -1.520282 |
| C | -2.632364 | 2.854746  | 3.310148  | C | -6.246156 | 1.541939  | -2.553586 |
| C | -4.182866 | 1.171326  | 2.439430  | H | -6.722453 | 1.037738  | -3.402806 |
| C | -3.813420 | 0.073568  | 0.279883  | H | -6.283307 | 2.621561  | -2.743679 |
| C | -3.355803 | 2.915185  | 4.482242  | H | -6.848071 | 1.332524  | -1.661871 |
| H | -1.740996 | 3.460840  | 3.194843  | C | -3.928440 | 1.433348  | -3.594726 |
| C | -4.918832 | 1.273243  | 3.651258  | H | -4.296139 | 0.936068  | -4.500606 |
| C | -4.569967 | 0.266280  | 1.417776  | H | -2.886269 | 1.139348  | -3.440653 |
| C | -4.518748 | 2.126826  | 4.653920  | H | -3.956456 | 2.514585  | -3.777423 |
| H | -3.028924 | 3.574134  | 5.282203  | C | -3.760809 | -2.893559 | 0.790205  |
| H | -5.800666 | 0.649198  | 3.775514  | H | -3.302904 | -2.096289 | 1.382061  |
| H | -5.483306 | -0.307567 | 1.549585  | C | -4.924560 | -3.475348 | 1.617757  |
| H | -5.085369 | 2.190633  | 5.578829  | H | -5.685016 | -2.716995 | 1.835975  |
| C | -4.249229 | -0.895578 | -0.779984 | H | -4.557508 | -3.870999 | 2.572798  |
| C | -4.718252 | -0.411031 | -2.027837 | H | -5.420912 | -4.295155 | 1.084282  |
| C | -4.255450 | -2.286862 | -0.522889 | C | -2.673023 | -3.959297 | 0.560315  |
| C | -5.175630 | -1.324489 | -2.981882 | H | -1.835302 | -3.541001 | -0.004281 |
| C | -4.734272 | -3.154641 | -1.513499 | H | -3.058122 | -4.828583 | 0.014596  |



|   |           |           |           |   |           |           |           |
|---|-----------|-----------|-----------|---|-----------|-----------|-----------|
| C | -0.698091 | -0.011160 | 3.624523  | H | 1.107035  | 7.082487  | -1.780951 |
| C | 0.019619  | -1.180475 | 3.898675  | H | -1.000902 | 8.381723  | -1.677984 |
| C | 0.483160  | -1.462648 | 5.193861  | H | -3.093298 | 7.278847  | -0.879737 |
| C | 0.188940  | -0.560222 | 6.216312  | C | -2.055023 | 2.607886  | 0.590135  |
| C | -0.537556 | 0.604979  | 5.958845  | C | -2.715363 | 3.162228  | 1.742518  |
| C | -0.974357 | 0.879957  | 4.661028  | C | -2.562888 | 1.433502  | 0.047418  |
| H | -1.022050 | 0.190976  | 2.609481  | C | -2.170344 | 4.232489  | 2.505817  |
| H | 0.537738  | -0.772958 | 7.224408  | C | -3.957390 | 2.592051  | 2.172417  |
| H | -0.758159 | 1.295547  | 6.767853  | C | -3.819442 | 0.874427  | 0.430623  |
| H | -1.531852 | 1.787517  | 4.449588  | C | -2.830119 | 4.727330  | 3.610433  |
| C | 1.307436  | -2.712137 | 5.390166  | H | -1.214354 | 4.653252  | 2.215869  |
| H | 2.367675  | -2.492947 | 5.192932  | C | -4.623174 | 3.139866  | 3.302674  |
| H | 1.247805  | -3.060892 | 6.426884  | C | -4.497388 | 1.487611  | 1.464247  |
| C | 0.833600  | -3.817860 | 4.437244  | C | -4.075993 | 4.186646  | 4.009053  |
| H | 1.481396  | -4.694763 | 4.476692  | H | -2.388170 | 5.539590  | 4.181255  |
| H | -0.176456 | -4.145669 | 4.727162  | H | -5.571182 | 2.702890  | 3.607384  |
| C | 0.737006  | -3.334390 | 3.001990  | H | -5.469112 | 1.103108  | 1.762341  |
| N | 0.308801  | -2.079205 | 2.838493  | H | -4.590637 | 4.591870  | 4.875927  |
| H | 0.074670  | -1.745026 | 1.887795  | C | -4.416552 | -0.294188 | -0.297369 |
| C | 0.532448  | -3.455274 | -1.498473 | C | -4.890809 | -0.127676 | -1.622483 |
| C | 1.705080  | -3.135406 | -0.689929 | C | -4.562352 | -1.546391 | 0.348158  |
| H | 0.493834  | -4.438431 | -1.966705 | C | -5.491864 | -1.210524 | -2.269206 |
| C | 0.298122  | 2.569548  | -0.259729 | C | -5.179364 | -2.595747 | -0.341279 |
| C | -0.877117 | 3.274950  | -0.038878 | C | -5.650022 | -2.456315 | -1.651127 |
| C | -0.946824 | 4.644186  | -0.481491 | H | -5.881143 | -1.072562 | -3.273897 |
| C | 0.237480  | 5.266347  | -0.993965 | H | -5.269674 | -3.562707 | 0.144821  |
| C | 1.426638  | 4.504516  | -1.117025 | C | 2.726841  | 2.369495  | -1.045037 |
| C | 1.475864  | 3.162283  | -0.803390 | C | 3.556368  | 1.995890  | 0.038638  |
| H | -3.066225 | 4.948678  | -0.130887 | C | 3.103770  | 2.039270  | -2.370679 |
| C | -2.146306 | 5.410132  | -0.469012 | C | 4.746008  | 1.308910  | -0.221661 |
| C | 0.193949  | 6.626017  | -1.406048 | C | 4.303533  | 1.351302  | -2.577847 |
| H | 2.317552  | 4.990607  | -1.506099 | C | 5.142648  | 0.976164  | -1.522807 |
| C | -0.977486 | 7.345114  | -1.353322 | H | 5.377765  | 1.011530  | 0.610862  |
| C | -2.160756 | 6.721113  | -0.893254 | H | 4.611081  | 1.125850  | -3.594805 |



|   |           |           |           |   |           |           |           |
|---|-----------|-----------|-----------|---|-----------|-----------|-----------|
| O | -1.872673 | 0.809492  | -0.978358 | C | 3.215559  | 2.347762  | 1.486175  |
| O | 0.375722  | 1.247817  | 0.143368  | H | 2.235022  | 2.831836  | 1.496354  |
| P | -0.451204 | 0.052920  | -0.635025 | C | 3.109827  | 1.097287  | 2.378507  |
| O | -0.592338 | -1.053819 | 0.375588  | H | 2.371879  | 0.396229  | 1.977435  |
| C | -4.821393 | 1.206988  | -2.365605 | H | 2.795687  | 1.376767  | 3.391151  |
| H | -4.311736 | 1.931882  | -1.725500 | H | 4.071049  | 0.575323  | 2.461052  |
| C | -6.231693 | 1.769589  | -2.635300 | C | 4.223236  | 3.360366  | 2.066202  |
| H | -6.798371 | 1.884517  | -1.704222 | H | 5.235658  | 2.940618  | 2.106434  |
| H | -6.808405 | 1.112950  | -3.297325 | H | 3.938748  | 3.643954  | 3.086843  |
| H | -6.165335 | 2.752862  | -3.116803 | H | 4.264304  | 4.271507  | 1.458745  |
| C | -4.004156 | 1.101804  | -3.667372 | O | 0.154555  | -0.260777 | -1.986262 |
| H | -3.928644 | 2.084922  | -4.147765 | S | 1.101891  | -4.378775 | 1.726265  |
| H | -4.474784 | 0.419250  | -4.385353 | O | 1.217713  | -2.502451 | -2.346542 |
| H | -2.991465 | 0.741631  | -3.464029 | H | -0.426485 | -3.103879 | -1.123637 |
| C | -4.070215 | -1.808057 | 1.772161  | H | 1.623803  | -2.237014 | -0.092935 |
| H | -3.487704 | -0.940796 | 2.094743  | C | 3.019114  | -3.842266 | -0.840998 |
| C | -5.250243 | -1.965975 | 2.752342  | C | 4.181456  | -3.169879 | -0.100044 |
| H | -5.901999 | -1.084987 | 2.747757  | C | 5.502817  | -3.930723 | -0.265834 |
| H | -4.883921 | -2.110718 | 3.776072  | H | 4.298575  | -2.140000 | -0.462770 |
| H | -5.868003 | -2.834026 | 2.491703  | H | 3.926454  | -3.104441 | 0.966074  |
| C | -3.133049 | -3.027470 | 1.850672  | C | 6.655548  | -3.325421 | 0.545239  |
| H | -2.281886 | -2.904013 | 1.175776  | H | 5.358233  | -4.979223 | 0.035600  |
| H | -3.647876 | -3.960379 | 1.593124  | H | 5.779762  | -3.950640 | -1.329982 |
| H | -2.748939 | -3.137780 | 2.872238  | H | 6.797624  | -2.277163 | 0.248718  |
| C | 2.272833  | 2.433441  | -3.593327 | H | 6.379483  | -3.312187 | 1.610536  |
| H | 1.319454  | 2.834038  | -3.238994 | C | 7.980637  | -4.079979 | 0.376064  |
| C | 1.940743  | 1.230737  | -4.496792 | H | 8.262197  | -4.075482 | -0.686111 |
| H | 1.308596  | 1.556892  | -5.331715 | H | 7.838202  | -5.134732 | 0.652708  |
| H | 1.397447  | 0.467173  | -3.934997 | C | 9.121757  | -3.482571 | 1.205966  |
| H | 2.842354  | 0.778493  | -4.927747 | H | 10.054761 | -4.040864 | 1.065415  |
| C | 2.971995  | 3.546929  | -4.399659 | H | 9.308181  | -2.440257 | 0.920692  |
| H | 3.167380  | 4.431594  | -3.783057 | H | 8.883723  | -3.496818 | 2.277035  |
| H | 2.348610  | 3.856069  | -5.247471 | H | 3.231844  | -3.910297 | -1.915973 |
| H | 3.933911  | 3.203505  | -4.799360 | H | 2.893463  | -4.876759 | -0.493447 |

|                                            |           |           |           |   |           |           |           |
|--------------------------------------------|-----------|-----------|-----------|---|-----------|-----------|-----------|
| C                                          | -6.296104 | -3.589774 | -2.361764 | H | 2.696775  | -1.600319 | 3.999060  |
| C                                          | -6.076285 | -3.802080 | -3.733926 | C | -1.687000 | 0.950233  | 5.860861  |
| C                                          | -7.145055 | -4.481204 | -1.683056 | H | -2.561401 | 0.312032  | 5.663097  |
| C                                          | -6.683215 | -4.864676 | -4.402597 | H | -1.667075 | 1.128340  | 6.941525  |
| C                                          | -7.751290 | -5.545042 | -2.350377 | C | -1.851383 | 2.280300  | 5.113235  |
| C                                          | -7.523789 | -5.741845 | -3.714059 | H | -2.804693 | 2.759949  | 5.339668  |
| H                                          | -7.996716 | -6.570149 | -4.234866 | H | -1.055356 | 2.975924  | 5.419963  |
| C                                          | 6.419172  | 0.260084  | -1.780759 | C | -1.724121 | 2.110349  | 3.610340  |
| C                                          | 7.579931  | 0.561140  | -1.046698 | N | -0.816138 | 1.221423  | 3.200833  |
| C                                          | 6.504181  | -0.731406 | -2.774558 | H | -0.580452 | 1.156059  | 2.194406  |
| C                                          | 8.781155  | -0.102718 | -1.297494 | C | -1.945544 | 3.070769  | -0.661030 |
| C                                          | 7.704569  | -1.396236 | -3.025702 | C | -2.886746 | 2.153624  | -0.025308 |
| C                                          | 8.849463  | -1.085202 | -2.288300 | H | -2.278273 | 4.087333  | -0.859207 |
| H                                          | 9.786102  | -1.598969 | -2.486900 | C | 0.513525  | -2.548662 | -0.642650 |
| H                                          | -8.410168 | -6.216231 | -1.805320 | C | 1.877300  | -2.785494 | -0.747970 |
| H                                          | -6.491807 | -5.012424 | -5.462423 | C | 2.315801  | -3.928155 | -1.506441 |
| H                                          | -5.403501 | -3.141330 | -4.273479 | C | 1.335139  | -4.850464 | -1.996265 |
| H                                          | -7.349954 | -4.322058 | -0.627982 | C | -0.039951 | -4.594780 | -1.762188 |
| H                                          | 5.615000  | -0.992306 | -3.341845 | C | -0.478637 | -3.451077 | -1.128064 |
| H                                          | 7.744743  | -2.160425 | -3.797762 | H | 4.435861  | -3.467651 | -1.507396 |
| H                                          | 7.544905  | 1.343326  | -0.293523 | C | 3.679921  | -4.174164 | -1.828980 |
| H                                          | 9.668902  | 0.158019  | -0.726877 | C | 1.753143  | -5.995305 | -2.727402 |
| <b>TS1-S-n-hexyl-tBu E= -3851.25724677</b> |           |           |           | H | -0.770822 | -5.317202 | -2.115787 |
| H                                          | -1.560075 | 1.419002  | -1.806091 | C | 3.083511  | -6.214829 | -3.000401 |
| C                                          | 1.077523  | -0.262450 | 3.554166  | C | 4.051841  | -5.284184 | -2.555924 |
| C                                          | -0.041650 | 0.403308  | 4.066243  | H | 0.993926  | -6.689072 | -3.080844 |
| C                                          | -0.430138 | 0.248282  | 5.406687  | H | 3.391006  | -7.089538 | -3.566898 |
| C                                          | 0.341407  | -0.570095 | 6.232012  | H | 5.100007  | -5.442316 | -2.795320 |
| C                                          | 1.467004  | -1.233010 | 5.736404  | C | 2.857929  | -1.847833 | -0.124100 |
| C                                          | 1.828921  | -1.081799 | 4.395852  | C | 3.866480  | -2.306324 | 0.794060  |
| H                                          | 1.338124  | -0.140475 | 2.508690  | C | 2.821976  | -0.493969 | -0.433793 |
| H                                          | 0.052161  | -0.691893 | 7.273452  | C | 3.877355  | -3.620571 | 1.339455  |
| H                                          | 2.055673  | -1.866471 | 6.393834  | C | 4.886684  | -1.392939 | 1.216681  |
|                                            |           |           |           | C | 3.851052  | 0.423147  | -0.061516 |

|   |           |           |           |   |           |           |           |
|---|-----------|-----------|-----------|---|-----------|-----------|-----------|
| C | 4.853802  | -4.014373 | 2.228961  | H | 6.024609  | 0.229204  | -4.161819 |
| H | 3.094040  | -4.314812 | 1.057587  | C | 3.367242  | 1.022166  | -4.102112 |
| C | 5.891501  | -1.837174 | 2.118761  | H | 2.344651  | 0.935458  | -3.723540 |
| C | 4.871896  | -0.059692 | 0.731373  | H | 3.552062  | 0.184065  | -4.785164 |
| C | 5.880239  | -3.120310 | 2.616474  | H | 3.440270  | 1.946812  | -4.687499 |
| H | 4.833500  | -5.020830 | 2.638335  | C | 3.386413  | 2.722127  | 1.826233  |
| H | 6.664768  | -1.134057 | 2.419212  | H | 3.235852  | 1.653952  | 2.004446  |
| H | 5.683847  | 0.605816  | 1.012539  | C | 4.582286  | 3.170565  | 2.690284  |
| H | 6.649392  | -3.445893 | 3.311489  | H | 5.498911  | 2.633708  | 2.420698  |
| C | 3.860791  | 1.840216  | -0.555936 | H | 4.380641  | 2.985728  | 3.752581  |
| C | 4.120645  | 2.107023  | -1.923847 | H | 4.780507  | 4.242432  | 2.568526  |
| C | 3.669227  | 2.918348  | 0.336468  | C | 2.095623  | 3.433523  | 2.273823  |
| C | 4.178476  | 3.433534  | -2.355916 | H | 1.245440  | 3.098728  | 1.673559  |
| C | 3.743297  | 4.230962  | -0.153460 | H | 2.175858  | 4.523487  | 2.186232  |
| C | 3.993842  | 4.522728  | -1.494682 | H | 1.887013  | 3.203750  | 3.326162  |
| H | 4.383054  | 3.619828  | -3.406520 | C | -2.188682 | -2.556492 | -3.419776 |
| H | 3.595436  | 5.042256  | 0.549822  | H | -1.100011 | -2.496769 | -3.334030 |
| C | -1.946813 | -3.203016 | -0.933376 | C | -2.657860 | -1.224419 | -4.033592 |
| C | -2.539995 | -3.433890 | 0.330824  | H | -2.150224 | -1.058387 | -4.991449 |
| C | -2.755913 | -2.803120 | -2.020360 | H | -2.416509 | -0.387857 | -3.374610 |
| C | -3.919604 | -3.267093 | 0.473579  | H | -3.736428 | -1.218047 | -4.232922 |
| C | -4.136750 | -2.654636 | -1.820571 | C | -2.522459 | -3.728754 | -4.365639 |
| C | -4.749516 | -2.879593 | -0.586150 | H | -3.607120 | -3.837412 | -4.489660 |
| H | -4.360764 | -3.458488 | 1.447913  | H | -2.135873 | -4.680392 | -3.984990 |
| H | -4.741219 | -2.355943 | -2.668851 | H | -2.086415 | -3.558979 | -5.357691 |
| O | 1.788958  | -0.011137 | -1.218970 | C | -1.729302 | -3.900268 | 1.540016  |
| O | 0.079657  | -1.428006 | 0.046089  | H | -0.673342 | -3.914604 | 1.256202  |
| P | 0.271731  | 0.080268  | -0.589307 | C | -1.859269 | -2.936014 | 2.733400  |
| O | 0.174228  | 1.019626  | 0.584492  | H | -2.886543 | -2.899746 | 3.116233  |
| C | 4.385152  | 1.000547  | -2.945533 | H | -1.565402 | -1.922194 | 2.445997  |
| H | 4.276516  | 0.035824  | -2.443143 | H | -1.209699 | -3.255636 | 3.556911  |
| C | 5.831932  | 1.063163  | -3.475787 | C | -2.104871 | -5.339922 | 1.943798  |
| H | 6.558102  | 1.005067  | -2.656945 | H | -1.959397 | -6.035683 | 1.109763  |
| H | 6.020772  | 1.994362  | -4.023256 | H | -3.154105 | -5.408209 | 2.255564  |

|   |            |           |           |   |           |           |           |
|---|------------|-----------|-----------|---|-----------|-----------|-----------|
| H | -1.484334  | -5.678989 | 2.782465  | C | -6.524248 | -1.681447 | 0.747431  |
| O | -0.628779  | 0.302455  | -1.785197 | C | -6.856107 | -4.091678 | 0.079530  |
| S | -2.662566  | 3.060716  | 2.573758  | H | -6.052967 | -1.963241 | 1.694758  |
| O | -2.268026  | 2.198162  | -1.771062 | H | -6.128142 | -0.700989 | 0.456933  |
| H | -0.912245  | 2.998952  | -0.328113 | H | -7.600666 | -1.571595 | 0.929015  |
| H | -2.450407  | 1.234398  | 0.345362  | H | -7.936567 | -4.004802 | 0.250280  |
| C | -4.381627  | 2.243038  | -0.104240 | H | -6.693611 | -4.854093 | -0.690875 |
| C | -4.959396  | 3.558179  | -0.637455 | H | -6.398941 | -4.452469 | 1.006969  |
| C | -6.492922  | 3.539864  | -0.691328 | C | 4.077611  | 5.960366  | -2.040721 |
| H | -4.628287  | 4.389902  | -0.000494 | C | 3.010949  | 6.156340  | -3.144598 |
| H | -4.562333  | 3.746893  | -1.643236 | C | 5.483735  | 6.201823  | -2.640150 |
| C | -7.093059  | 4.841747  | -1.237892 | H | 3.152397  | 5.459007  | -3.976685 |
| H | -6.824200  | 2.696778  | -1.315414 | H | 2.002113  | 5.998727  | -2.745929 |
| H | -6.890779  | 3.349546  | 0.316221  | H | 3.062088  | 7.174911  | -3.549362 |
| H | -6.759193  | 5.685518  | -0.615845 | H | 5.557551  | 7.218131  | -3.047147 |
| H | -6.694242  | 5.030130  | -2.245668 | H | 6.260129  | 6.084667  | -1.875241 |
| C | -8.626375  | 4.831081  | -1.294259 | H | 5.705924  | 5.500357  | -3.451003 |
| H | -9.024192  | 4.645068  | -0.286470 | C | 3.835448  | 7.020236  | -0.948904 |
| H | -8.959818  | 3.986325  | -1.913685 | H | 2.840304  | 6.923128  | -0.500017 |
| C | -9.217655  | 6.132984  | -1.845395 | H | 4.579961  | 6.956825  | -0.147109 |
| H | -10.312576 | 6.094489  | -1.873646 | H | 3.905195  | 8.023220  | -1.385598 |
| H | -8.930237  | 6.992243  | -1.226858 | C | -7.009763 | -2.274902 | -1.630481 |
| H | -8.864486  | 6.327439  | -2.865589 | H | -6.651382 | -1.302124 | -1.986890 |
| H | -4.764974  | 2.037470  | 0.902791  | H | -6.902657 | -2.996995 | -2.447808 |
| H | -4.715737  | 1.398283  | -0.723221 | H | -8.080272 | -2.175241 | -1.416529 |
| C | -6.265975  | -2.730398 | -0.360321 |   |           |           |           |

## 11.M062X Geometries for All the Optimized Compounds and Transition States

**M-(R)-3-TS1-R E= -3522.40452989**

|   |           |           |           |   |           |           |           |
|---|-----------|-----------|-----------|---|-----------|-----------|-----------|
| H | -0.356897 | 2.544212  | -1.179780 | C | -1.394995 | -3.089634 | -0.669165 |
| C | 0.607067  | -2.102711 | 2.791622  | C | -1.276081 | -4.315902 | 0.064350  |
| C | 1.651607  | -1.299209 | 3.250680  | C | -0.248100 | -2.381128 | -0.965879 |
| C | 2.362811  | -1.616633 | 4.413243  | C | -2.402550 | -5.039806 | 0.542879  |
| C | 2.024223  | -2.779163 | 5.099400  | C | 0.023661  | -4.806369 | 0.375052  |
| C | 0.990108  | -3.599071 | 4.649364  | C | 1.059976  | -2.844224 | -0.642617 |
| C | 0.278661  | -3.255113 | 3.501086  | C | -2.240201 | -6.198200 | 1.262182  |
| H | 0.061651  | -1.816086 | 1.895654  | H | -3.399974 | -4.659897 | 0.348113  |
| H | 2.574632  | -3.037799 | 6.000352  | C | 0.159053  | -6.017448 | 1.105589  |
| H | 0.736874  | -4.501147 | 5.197340  | C | 1.165042  | -4.057077 | -0.002308 |
| H | -0.534169 | -3.884528 | 3.150258  | C | -0.946554 | -6.702329 | 1.539284  |
| C | 3.421517  | -0.649738 | 4.873567  | H | -3.113375 | -6.731708 | 1.625448  |
| H | 2.958029  | 0.129512  | 5.493579  | H | 1.160295  | -6.378308 | 1.326625  |
| H | 4.165021  | -1.156787 | 5.494863  | H | 2.148439  | -4.450202 | 0.244410  |
| C | 4.101070  | 0.002973  | 3.670391  | H | -0.835769 | -7.623650 | 2.102806  |
| H | 4.797255  | 0.785678  | 3.972902  | C | 2.269623  | -2.037998 | -0.938430 |
| H | 4.673150  | -0.752664 | 3.110886  | C | 2.456565  | -1.408328 | -2.175345 |
| C | 3.098354  | 0.573233  | 2.694754  | C | 3.283842  | -1.931085 | 0.021627  |
| N | 1.980094  | -0.121023 | 2.539162  | C | 3.625513  | -0.706150 | -2.442117 |
| H | 1.324969  | 0.151051  | 1.789837  | C | 4.449330  | -1.221977 | -0.245231 |
| C | 0.662027  | 3.281858  | 0.400421  | C | 4.642971  | -0.597938 | -1.483616 |
| C | 1.853887  | 2.765565  | -0.270497 | H | 3.743111  | -0.219237 | -3.406752 |
| H | 0.118801  | 2.558492  | 1.004959  | H | 5.229212  | -1.167312 | 0.509811  |
| H | 1.821768  | 1.710934  | -0.528699 | C | -4.589760 | 0.766458  | -0.485153 |
| C | -3.030530 | -1.236479 | -0.646630 | C | -4.362489 | 1.169871  | 0.836576  |
| C | -2.712968 | -2.515246 | -1.059333 | C | -5.184748 | 1.678111  | -1.364433 |
| C | -3.637216 | -3.220611 | -1.897417 | C | -4.736549 | 2.437630  | 1.264614  |
| C | -4.885239 | -2.609035 | -2.205950 | C | -5.553799 | 2.946876  | -0.935572 |
| C | -5.172317 | -1.312688 | -1.712614 | C | -5.342659 | 3.347755  | 0.388839  |
| C | -4.269371 | -0.605173 | -0.953648 | H | -4.584421 | 2.713344  | 2.304549  |
| H | -2.388609 | -4.954993 | -2.275233 | H | -5.987017 | 3.645042  | -1.646161 |
| C | -3.351350 | -4.492446 | -2.464950 | O | -0.377654 | -1.152386 | -1.583056 |
| C | -5.820961 | -3.300530 | -3.020955 | O | -2.119842 | -0.543177 | 0.122560  |
| H | -6.138053 | -0.870401 | -1.945163 | P | -0.789768 | 0.089485  | -0.596379 |
| C | -5.525489 | -4.536119 | -3.535058 | O | 0.216962  | 0.270750  | 0.491040  |
| C | -4.270317 | -5.130374 | -3.260916 | O | -1.131403 | 1.247970  | -1.487019 |
| H | -6.772755 | -2.821245 | -3.234850 | S | 3.439932  | 1.970002  | 1.814459  |
| H | -6.243925 | -5.056073 | -4.161215 | O | 0.190934  | 3.380112  | -0.951666 |
| H | -4.030190 | -6.098484 | -3.690117 | C | 2.910228  | 3.589327  | -0.834327 |
|   |           |           |           | C | 3.024495  | 4.960921  | -0.560950 |

|                                        |           |           |           |   |           |           |           |
|----------------------------------------|-----------|-----------|-----------|---|-----------|-----------|-----------|
| C                                      | 3.855833  | 2.964233  | -1.658001 | C | 0.347785  | -3.299886 | 3.515551  |
| C                                      | 4.069873  | 5.688081  | -1.112973 | H | 0.108846  | -1.840018 | 1.932522  |
| H                                      | 2.299128  | 5.458813  | 0.074376  | H | 2.828410  | -3.249593 | 5.840741  |
| C                                      | 4.906972  | 3.691685  | -2.199891 | H | 0.849559  | -4.590279 | 5.165301  |
| H                                      | 3.759390  | 1.900589  | -1.854109 | H | -0.524960 | -3.875596 | 3.220132  |
| C                                      | 5.010775  | 5.055148  | -1.928536 | C | 3.737844  | -0.909957 | 4.672257  |
| H                                      | 4.157230  | 6.749775  | -0.905998 | H | 3.371485  | -0.117195 | 5.338163  |
| H                                      | 5.642517  | 3.194502  | -2.826017 | H | 4.494686  | -1.472336 | 5.226078  |
| H                                      | 5.829897  | 5.629274  | -2.351348 | C | 4.361675  | -0.276101 | 3.430021  |
| H                                      | 0.726191  | 4.263547  | 0.864850  | H | 5.125594  | 0.457704  | 3.688062  |
| H                                      | 3.151349  | -2.407008 | 0.990558  | H | 4.842011  | -1.054097 | 2.816446  |
| H                                      | 1.686155  | -1.476697 | -2.936062 | C | 3.323070  | 0.371273  | 2.545451  |
| H                                      | -3.913693 | 0.477048  | 1.540570  | N | 2.163392  | -0.263822 | 2.450187  |
| H                                      | -5.337517 | 1.396050  | -2.402450 | H | 1.470629  | 0.056915  | 1.755761  |
| C                                      | 5.883069  | 0.166510  | -1.770023 | C | 2.231619  | 1.850104  | -1.244490 |
| C                                      | 6.438418  | 0.176594  | -3.056428 | C | 1.921849  | 2.756286  | -0.143685 |
| C                                      | 6.515162  | 0.907893  | -0.762575 | H | 3.157867  | 2.007527  | -1.794153 |
| C                                      | 7.598718  | 0.898111  | -3.325327 | C | -2.954731 | -1.320607 | -0.609968 |
| H                                      | 5.972291  | -0.405959 | -3.846356 | C | -2.589379 | -2.612739 | -0.930833 |
| C                                      | 7.676258  | 1.627186  | -1.030836 | C | -3.484137 | -3.405819 | -1.723810 |
| H                                      | 6.074384  | 0.947128  | 0.230439  | C | -4.752084 | -2.865032 | -2.077235 |
| C                                      | 8.223737  | 1.624232  | -2.312487 | C | -5.092643 | -1.552483 | -1.665750 |
| H                                      | 8.020213  | 0.883779  | -4.326170 | C | -4.221057 | -0.763952 | -0.951646 |
| H                                      | 8.146720  | 2.201247  | -0.238088 | H | -2.167483 | -5.112453 | -1.988298 |
| H                                      | 9.129846  | 2.184596  | -2.522325 | C | -3.146015 | -4.699404 | -2.207789 |
| C                                      | -5.762758 | 4.694843  | 0.849999  | C | -5.654870 | -3.643224 | -2.850658 |
| C                                      | -6.934157 | 5.280799  | 0.352637  | H | -6.075870 | -1.165881 | -1.923110 |
| C                                      | -5.008269 | 5.406550  | 1.791395  | C | -5.308947 | -4.897635 | -3.282225 |
| C                                      | -7.339418 | 6.540693  | 0.781987  | C | -4.034276 | -5.422870 | -2.964376 |
| H                                      | -7.544679 | 4.732730  | -0.359587 | H | -6.622693 | -3.215587 | -3.100044 |
| C                                      | -5.414347 | 6.666248  | 2.222727  | H | -6.001905 | -5.484402 | -3.877236 |
| H                                      | -4.084288 | 4.979469  | 2.171356  | H | -3.752267 | -6.406153 | -3.328451 |
| C                                      | -6.581054 | 7.238534  | 1.719696  | C | -1.249606 | -3.123792 | -0.527129 |
| H                                      | -8.254770 | 6.973489  | 0.389331  | C | -1.073676 | -4.316842 | 0.249136  |
| H                                      | -4.813006 | 7.205749  | 2.948578  | C | -0.127979 | -2.412985 | -0.899155 |
| H                                      | -6.897624 | 8.220917  | 2.056715  | C | -2.165745 | -5.028636 | 0.816311  |
|                                        |           |           |           | C | 0.246190  | -4.785253 | 0.505533  |
|                                        |           |           |           | C | 1.199332  | -2.865981 | -0.654208 |
|                                        |           |           |           | C | -1.953993 | -6.155052 | 1.573264  |
|                                        |           |           |           | H | -3.175307 | -4.663366 | 0.658036  |
|                                        |           |           |           | C | 0.431620  | -5.964227 | 1.275306  |
|                                        |           |           |           | C | 1.358900  | -4.048521 | 0.026654  |
|                                        |           |           |           | C | -0.642397 | -6.638269 | 1.797581  |
|                                        |           |           |           | H | -2.800562 | -6.678522 | 2.007179  |
| <b>M-(R)-3-TS1-S E= -3522.40381627</b> |           |           |           |   |           |           |           |
| H                                      | 0.274427  | 2.058953  | -1.731437 |   |           |           |           |
| C                                      | 0.696226  | -2.164868 | 2.788202  |   |           |           |           |
| C                                      | 1.818867  | -1.431181 | 3.173655  |   |           |           |           |
| C                                      | 2.591103  | -1.803652 | 4.280317  |   |           |           |           |
| C                                      | 2.231673  | -2.949712 | 4.983090  |   |           |           |           |
| C                                      | 1.117960  | -3.699392 | 4.606233  |   |           |           |           |

|   |           |           |           |
|---|-----------|-----------|-----------|
| H | 1.446629  | -6.309297 | 1.455029  |
| H | 2.360019  | -4.426894 | 0.220232  |
| H | -0.491244 | -7.534694 | 2.391212  |
| C | 2.362560  | -2.061228 | -1.100808 |
| C | 2.459267  | -1.588518 | -2.416221 |
| C | 3.396982  | -1.767746 | -0.207019 |
| C | 3.555114  | -0.835978 | -2.818585 |
| C | 4.483306  | -0.994845 | -0.605596 |
| C | 4.576538  | -0.511355 | -1.915772 |
| H | 3.599353  | -0.458881 | -3.836735 |
| H | 5.274217  | -0.772519 | 0.105910  |
| C | -4.602152 | 0.612989  | -0.547649 |
| C | -4.389776 | 1.079567  | 0.755753  |
| C | -5.239600 | 1.460410  | -1.460270 |
| C | -4.810783 | 2.348241  | 1.131816  |
| C | -5.657974 | 2.731175  | -1.082588 |
| C | -5.453548 | 3.196834  | 0.221181  |
| H | -4.621221 | 2.692705  | 2.144609  |
| H | -6.165577 | 3.363054  | -1.806094 |
| O | -0.292449 | -1.200683 | -1.533587 |
| O | -2.080830 | -0.537287 | 0.113528  |
| P | -0.721416 | 0.058363  | -0.571779 |
| O | 0.250165  | 0.249418  | 0.546500  |
| O | -0.993661 | 1.199846  | -1.508769 |
| S | 3.665753  | 1.788034  | 1.699321  |
| O | 1.148721  | 2.583252  | -1.845035 |
| H | 2.021188  | 0.796487  | -1.061550 |
| H | 1.097859  | 2.445589  | 0.491630  |
| C | 2.443867  | 4.110298  | -0.016139 |
| C | 3.588382  | 4.528047  | -0.710619 |
| C | 1.785371  | 5.001491  | 0.841803  |
| C | 4.056919  | 5.825657  | -0.552510 |
| H | 4.115800  | 3.841333  | -1.366054 |
| C | 2.255843  | 6.299517  | 0.994056  |
| H | 0.905600  | 4.666373  | 1.384416  |
| C | 3.390707  | 6.710856  | 0.295730  |
| H | 4.943209  | 6.147822  | -1.089597 |
| H | 1.741973  | 6.988872  | 1.656107  |
| H | 3.761328  | 7.724410  | 0.415351  |
| H | 3.337562  | -2.138084 | 0.813873  |
| H | 1.664492  | -1.804344 | -3.123450 |
| H | -3.895528 | 0.442046  | 1.481131  |
| H | -5.400908 | 1.121697  | -2.479959 |
| C | 5.698278  | 0.369120  | -2.325858 |

|   |           |           |           |
|---|-----------|-----------|-----------|
| C | 6.262376  | 0.273199  | -3.604252 |
| C | 6.196288  | 1.335843  | -1.441208 |
| C | 7.299632  | 1.118124  | -3.987010 |
| H | 5.897145  | -0.481834 | -4.295104 |
| C | 7.232125  | 2.183194  | -1.826615 |
| H | 5.752346  | 1.435014  | -0.452628 |
| C | 7.787786  | 2.076646  | -3.100214 |
| H | 7.731989  | 1.023189  | -4.978624 |
| H | 7.601607  | 2.930682  | -1.130593 |
| H | 8.597094  | 2.735306  | -3.400324 |
| C | -5.908390 | 4.549699  | 0.629748  |
| C | -6.422194 | 4.773226  | 1.913875  |
| C | -5.838626 | 5.630226  | -0.259066 |
| C | -6.854202 | 6.039119  | 2.297895  |
| H | -6.504921 | 3.942219  | 2.608970  |
| C | -6.271470 | 6.896231  | 0.124416  |
| H | -5.419343 | 5.481213  | -1.250261 |
| C | -6.780976 | 7.105925  | 1.404436  |
| H | -7.257570 | 6.189695  | 3.294925  |
| H | -6.202164 | 7.722742  | -0.576722 |
| H | -7.118454 | 8.093545  | 1.703863  |

**M-(R)-4-TS1-R E= -3374.79928976**

|   |           |           |           |
|---|-----------|-----------|-----------|
| H | -1.763587 | 1.193811  | -2.355397 |
| C | 1.191449  | -0.807338 | 2.710006  |
| C | -0.176938 | -0.969706 | 2.928308  |
| C | -0.670746 | -2.005075 | 3.728390  |
| C | 0.237056  | -2.881261 | 4.317723  |
| C | 1.606559  | -2.729688 | 4.114281  |
| C | 2.080513  | -1.692094 | 3.312981  |
| H | 1.542033  | 0.003001  | 2.075124  |
| H | -0.138822 | -3.687544 | 4.942437  |
| H | 2.305639  | -3.419231 | 4.577363  |
| H | 3.148363  | -1.569760 | 3.159306  |
| C | -2.163486 | -2.114966 | 3.887642  |
| H | -2.581713 | -2.698510 | 3.055655  |
| H | -2.414281 | -2.647496 | 4.809301  |
| C | -2.787324 | -0.720146 | 3.902778  |
| H | -3.877228 | -0.761039 | 3.917896  |
| H | -2.465785 | -0.179394 | 4.804495  |
| C | -2.340638 | 0.114205  | 2.723977  |
| N | -1.089964 | -0.070096 | 2.321476  |
| H | -0.713096 | 0.519214  | 1.559693  |
| C | -3.285790 | 0.885318  | -1.155498 |

|   |           |           |           |   |           |           |           |
|---|-----------|-----------|-----------|---|-----------|-----------|-----------|
| C | -2.825118 | 2.096433  | -0.482939 | C | -3.644652 | -2.376007 | 0.285188  |
| H | -2.758639 | -0.034375 | -0.895747 | C | -4.092532 | -2.503065 | -2.060086 |
| H | -1.772802 | 2.114947  | -0.209021 | C | -4.583766 | -2.370152 | -0.758734 |
| C | 0.643302  | -2.166988 | -0.960214 | H | -3.985396 | -2.266219 | 1.312575  |
| C | 1.991765  | -2.407658 | -1.120058 | H | -4.770368 | -2.486451 | -2.906637 |
| C | 2.395753  | -3.483052 | -1.977370 | O | 1.904678  | 0.341343  | -1.466906 |
| C | 1.394155  | -4.302808 | -2.572053 | O | 0.244245  | -1.079067 | -0.215930 |
| C | 0.023791  | -4.037583 | -2.317453 | P | 0.365372  | 0.394516  | -0.926082 |
| C | -0.372122 | -2.983677 | -1.529520 | O | 0.165517  | 1.364610  | 0.197472  |
| H | 4.529425  | -3.105408 | -1.877552 | C | 3.089887  | 6.560621  | -0.688920 |
| C | 3.757039  | -3.744299 | -2.292612 | C | 4.158515  | 7.093894  | -1.657046 |
| C | 1.782737  | -5.374297 | -3.419861 | H | 4.022530  | 8.170713  | -1.811233 |
| H | -0.725205 | -4.692537 | -2.756419 | H | 4.098880  | 6.605839  | -2.635132 |
| C | 3.105635  | -5.613308 | -3.689516 | H | 5.164931  | 6.930133  | -1.256188 |
| C | 4.100681  | -4.780271 | -3.125337 | C | 1.695056  | 6.807491  | -1.287232 |
| H | 1.005469  | -5.995938 | -3.856887 | H | 0.912751  | 6.429396  | -0.619482 |
| H | 3.392924  | -6.432727 | -4.341027 | H | 1.578714  | 6.312986  | -2.257129 |
| H | 5.146034  | -4.959850 | -3.357519 | H | 1.531752  | 7.881579  | -1.434545 |
| C | 2.966466  | -1.513543 | -0.433160 | C | -6.078913 | -2.273539 | -0.440365 |
| C | 3.938000  | -2.015057 | 0.493075  | C | -6.492613 | -3.535548 | 0.336111  |
| C | 2.879696  | -0.148852 | -0.624345 | H | -7.563988 | -3.504454 | 0.566208  |
| C | 3.996503  | -3.382307 | 0.878935  | H | -5.945694 | -3.619495 | 1.281420  |
| C | 4.837101  | -1.099594 | 1.109834  | H | -6.293397 | -4.438074 | -0.252026 |
| C | 3.754102  | 0.786048  | 0.000559  | C | -6.368489 | -1.038683 | 0.426506  |
| C | 4.914958  | -3.814271 | 1.803367  | H | -7.434544 | -1.003029 | 0.679308  |
| H | 3.288567  | -4.084777 | 0.452462  | H | -6.117845 | -0.113415 | -0.104554 |
| C | 5.793116  | -1.581333 | 2.045151  | H | -5.803708 | -1.049063 | 1.363467  |
| C | 4.727467  | 0.285978  | 0.834271  | O | -0.470269 | 0.457957  | -2.173119 |
| C | 5.833727  | -2.908724 | 2.386757  | S | -3.371675 | 1.261116  | 2.042392  |
| H | 4.934061  | -4.860238 | 2.094108  | O | -2.718882 | 1.566449  | -2.284168 |
| H | 6.479873  | -0.869341 | 2.495580  | C | -3.572374 | 3.342287  | -0.396987 |
| H | 5.425255  | 0.969496  | 1.311990  | C | -4.950032 | 3.411087  | -0.647119 |
| H | 6.559733  | -3.267677 | 3.109684  | C | -2.869992 | 4.501148  | -0.036267 |
| C | 3.589497  | 2.248809  | -0.191714 | C | -5.610262 | 4.628371  | -0.543487 |
| C | 3.392481  | 2.821746  | -1.455550 | H | -5.504007 | 2.518214  | -0.920263 |
| C | 3.637783  | 3.099903  | 0.913900  | C | -3.534046 | 5.716258  | 0.065724  |
| C | 3.247601  | 4.195084  | -1.591957 | H | -1.803738 | 4.433537  | 0.163829  |
| C | 3.490106  | 4.478222  | 0.769518  | C | -4.903739 | 5.778817  | -0.189066 |
| C | 3.287125  | 5.056804  | -0.485323 | H | -6.676647 | 4.683104  | -0.736817 |
| H | 3.096570  | 4.605134  | -2.587104 | H | -2.987488 | 6.611743  | 0.342840  |
| H | 3.522078  | 5.095743  | 1.660639  | H | -5.425085 | 6.727932  | -0.108544 |
| C | -1.807320 | -2.709546 | -1.262696 | H | -4.356291 | 0.735692  | -1.277932 |
| C | -2.285569 | -2.536789 | 0.045236  | H | 3.766173  | 2.677100  | 1.907027  |
| C | -2.729433 | -2.670509 | -2.308814 | H | 3.356103  | 2.187613  | -2.335185 |



|   |           |           |           |
|---|-----------|-----------|-----------|
| H | -1.585021 | -2.552218 | 0.876935  |
| H | -2.377320 | -2.768995 | -3.332192 |
| C | 3.197936  | 7.339874  | 0.625010  |
| H | 2.431274  | 7.030193  | 1.343817  |
| H | 4.180568  | 7.211240  | 1.092375  |
| H | 3.058326  | 8.408531  | 0.429265  |
| C | -6.933690 | -2.180066 | -1.707645 |
| H | -6.668087 | -1.304238 | -2.310661 |
| H | -6.833488 | -3.072892 | -2.334196 |
| H | -7.988946 | -2.087362 | -1.429277 |

**M-(R)-4-TS1-S E= -3374.79823285**

|   |           |           |           |
|---|-----------|-----------|-----------|
| H | 0.195388  | 2.399553  | -1.730924 |
| C | 0.767581  | -1.982202 | 2.642015  |
| C | 2.022675  | -1.410710 | 2.855688  |
| C | 2.890876  | -1.900729 | 3.838281  |
| C | 2.486180  | -2.999224 | 4.591321  |
| C | 1.239710  | -3.588889 | 4.383033  |
| C | 0.380085  | -3.073728 | 3.414443  |
| H | 0.110384  | -1.570759 | 1.879478  |
| H | 3.156970  | -3.390919 | 5.351850  |
| H | 0.940287  | -4.447048 | 4.976576  |
| H | -0.592474 | -3.528339 | 3.245655  |
| C | 4.193955  | -1.175420 | 4.049551  |
| H | 4.041464  | -0.349416 | 4.757125  |
| H | 4.940284  | -1.843052 | 4.489139  |
| C | 4.708013  | -0.614932 | 2.723828  |
| H | 5.595600  | 0.003477  | 2.860668  |
| H | 4.980023  | -1.442169 | 2.049643  |
| C | 3.649187  | 0.178726  | 1.996786  |
| N | 2.412350  | -0.291439 | 2.082786  |
| H | 1.678231  | 0.124708  | 1.489155  |
| C | 2.174705  | 2.042405  | -1.562128 |
| C | 2.123481  | 2.841888  | -0.342190 |
| H | 3.012874  | 2.182219  | -2.241486 |
| C | -3.091465 | -0.751631 | -0.358183 |
| C | -2.899331 | -2.067957 | -0.724398 |
| C | -3.944842 | -2.744922 | -1.435687 |
| C | -5.172848 | -2.062549 | -1.663878 |
| C | -5.325841 | -0.726718 | -1.216694 |
| C | -4.310410 | -0.049268 | -0.583100 |
| H | -2.855177 | -4.580349 | -1.829223 |
| C | -3.798404 | -4.060113 | -1.955833 |
| C | -6.224390 | -2.725642 | -2.351977 |

|   |           |           |           |
|---|-----------|-----------|-----------|
| H | -6.277867 | -0.228630 | -1.383135 |
| C | -6.060933 | -4.003358 | -2.821013 |
| C | -4.827794 | -4.670197 | -2.628745 |
| H | -7.158547 | -2.191964 | -2.506643 |
| H | -6.867893 | -4.501404 | -3.349372 |
| H | -4.692694 | -5.672480 | -3.023733 |
| C | -1.593907 | -2.727024 | -0.437996 |
| C | -1.496564 | -3.937811 | 0.323522  |
| C | -0.431265 | -2.137435 | -0.892065 |
| C | -2.614024 | -4.526108 | 0.976759  |
| C | -0.222057 | -4.552568 | 0.476460  |
| C | 0.854256  | -2.735266 | -0.748537 |
| C | -2.469924 | -5.670837 | 1.721676  |
| H | -3.586508 | -4.051743 | 0.894879  |
| C | -0.108472 | -5.747248 | 1.236804  |
| C | 0.922869  | -3.941312 | -0.090462 |
| C | -1.206255 | -6.297367 | 1.847108  |
| H | -3.333233 | -6.099600 | 2.221518  |
| H | 0.872702  | -6.203542 | 1.339820  |
| H | 1.884421  | -4.435923 | 0.022951  |
| H | -1.110995 | -7.205519 | 2.434440  |
| C | 2.084394  | -2.083838 | -1.264309 |
| C | 2.144613  | -1.501675 | -2.538229 |
| C | 3.249779  | -2.091583 | -0.492965 |
| C | 3.332946  | -0.959697 | -3.013078 |
| C | 4.435952  | -1.541719 | -0.973952 |
| C | 4.507530  | -0.967337 | -2.245639 |
| H | 3.341791  | -0.525014 | -4.009893 |
| H | 5.313254  | -1.563491 | -0.335552 |
| C | -4.488359 | 1.363031  | -0.160555 |
| C | -4.112354 | 1.809621  | 1.113656  |
| C | -5.089820 | 2.279005  | -1.025010 |
| C | -4.341763 | 3.123270  | 1.497294  |
| C | -5.314805 | 3.597812  | -0.633860 |
| C | -4.947450 | 4.049974  | 0.635442  |
| H | -4.042491 | 3.432728  | 2.495369  |
| H | -5.776951 | 4.273841  | -1.345177 |
| O | -0.516406 | -0.910065 | -1.515512 |
| O | -2.072307 | -0.087836 | 0.291249  |
| P | -0.748194 | 0.387398  | -0.537877 |
| O | 0.343304  | 0.513770  | 0.474008  |
| C | 5.795382  | -0.362671 | -2.810477 |
| C | 6.155411  | -1.066199 | -4.129150 |
| H | 7.080580  | -0.645297 | -4.539685 |

|   |           |           |           |
|---|-----------|-----------|-----------|
| H | 5.370005  | -0.945858 | -4.881886 |
| H | 6.309800  | -2.139005 | -3.969123 |
| C | 5.579237  | 1.135749  | -3.076915 |
| H | 5.332548  | 1.659504  | -2.145642 |
| H | 4.769311  | 1.304555  | -3.795307 |
| H | 6.491813  | 1.582925  | -3.488273 |
| C | -5.166813 | 5.489911  | 1.104572  |
| C | -6.037057 | 5.488982  | 2.372092  |
| H | -6.201986 | 6.516649  | 2.716506  |
| H | -5.562428 | 4.935076  | 3.188431  |
| H | -7.013773 | 5.033124  | 2.175812  |
| C | -3.806079 | 6.129605  | 1.425884  |
| H | -3.945255 | 7.163967  | 1.761974  |
| H | -3.161424 | 6.140215  | 0.540327  |
| H | -3.282810 | 5.586111  | 2.219349  |
| O | -1.032662 | 1.537124  | -1.461722 |
| S | 4.051100  | 1.543429  | 1.096351  |
| O | 1.076341  | 2.902181  | -1.905732 |
| H | 1.907715  | 0.992713  | -1.439956 |
| H | 1.397379  | 2.505742  | 0.391703  |
| C | 2.755946  | 4.141499  | -0.170142 |
| C | 3.718086  | 4.625710  | -1.068009 |
| C | 2.395274  | 4.910855  | 0.944926  |
| C | 4.305274  | 5.865171  | -0.849843 |
| H | 4.004730  | 4.039904  | -1.936127 |
| C | 2.986696  | 6.148530  | 1.160848  |
| H | 1.656008  | 4.522828  | 1.640154  |
| C | 3.941282  | 6.625094  | 0.262681  |
| H | 5.047980  | 6.241183  | -1.545813 |
| H | 2.706673  | 6.740552  | 2.025901  |
| H | 4.405153  | 7.592585  | 0.429316  |
| H | 3.224931  | -2.527206 | 0.504029  |
| H | 1.258325  | -1.485344 | -3.164338 |
| H | -3.647492 | 1.119458  | 1.810228  |
| H | -5.370230 | 1.962966  | -2.026221 |
| C | 6.975309  | -0.513381 | -1.845885 |
| H | 6.792314  | 0.004344  | -0.897872 |
| H | 7.188969  | -1.566243 | -1.630541 |
| H | 7.872815  | -0.076224 | -2.296611 |
| C | -5.863798 | 6.344180  | 0.041997  |
| H | -5.270919 | 6.412042  | -0.876655 |
| H | -6.851735 | 5.945102  | -0.213778 |
| H | -6.003105 | 7.360813  | 0.425082  |

**M-(R)-5-TS1-R E= -3994.07167563**

|   |           |           |           |
|---|-----------|-----------|-----------|
| H | -1.382197 | 1.596749  | -1.874469 |
| C | 0.606478  | -1.478137 | 3.006308  |
| C | -0.217081 | -0.519025 | 3.595816  |
| C | -0.794248 | -0.729857 | 4.853765  |
| C | -0.511476 | -1.915071 | 5.525690  |
| C | 0.322665  | -2.875943 | 4.957038  |
| C | 0.877435  | -2.656548 | 3.697884  |
| H | 1.018829  | -1.299256 | 2.016581  |
| H | -0.954381 | -2.082620 | 6.504224  |
| H | 0.538790  | -3.794220 | 5.493908  |
| H | 1.527294  | -3.402748 | 3.251923  |
| C | -1.722995 | 0.327719  | 5.384888  |
| H | -2.735355 | 0.156998  | 4.991833  |
| H | -1.786019 | 0.275705  | 6.475331  |
| C | -1.235642 | 1.707850  | 4.949929  |
| H | -1.929470 | 2.496824  | 5.240520  |
| H | -0.266327 | 1.925363  | 5.422034  |
| C | -1.003649 | 1.773335  | 3.458691  |
| N | -0.503118 | 0.679336  | 2.895626  |
| H | -0.197653 | 0.723808  | 1.906774  |
| C | -2.438090 | 2.178118  | -0.297248 |
| C | -1.354423 | 3.134589  | -0.095357 |
| H | -2.269377 | 1.165670  | 0.078403  |
| H | -0.354299 | 2.710710  | -0.053568 |
| C | -0.820712 | -2.462365 | -0.792936 |
| C | 0.209915  | -3.371241 | -0.920426 |
| C | -0.026704 | -4.560865 | -1.686148 |
| C | -1.339102 | -4.813562 | -2.176512 |
| C | -2.370992 | -3.863678 | -1.952819 |
| C | -2.128358 | -2.677170 | -1.307444 |
| H | 2.015749  | -5.292262 | -1.670549 |
| C | 1.001474  | -5.490489 | -2.001144 |
| C | -1.592774 | -6.000530 | -2.913459 |
| H | -3.368221 | -4.080156 | -2.327057 |
| C | -0.584431 | -6.890222 | -3.182010 |
| C | 0.729013  | -6.622324 | -2.728935 |
| H | -2.603096 | -6.179964 | -3.272165 |
| H | -0.786916 | -7.792147 | -3.751265 |
| H | 1.530597  | -7.315795 | -2.964453 |
| C | 1.520751  | -3.066048 | -0.283184 |
| C | 2.148405  | -3.956988 | 0.649576  |
| C | 2.125708  | -1.849287 | -0.530848 |
| C | 1.537099  | -5.160827 | 1.096393  |

|   |           |           |           |   |           |           |           |
|---|-----------|-----------|-----------|---|-----------|-----------|-----------|
| C | 3.411212  | -3.595866 | 1.200674  | H | 5.442688  | -0.458137 | 2.781857  |
| C | 3.376721  | -1.460380 | 0.022434  | H | 4.470929  | 0.162952  | 4.130330  |
| C | 2.162327  | -5.970847 | 2.011987  | H | 5.443108  | 1.273112  | 3.146602  |
| H | 0.554947  | -5.427778 | 0.722021  | C | 2.731652  | 1.725207  | 2.705700  |
| C | 4.039051  | -4.461978 | 2.135969  | H | 1.918548  | 1.940040  | 2.006498  |
| C | 4.006475  | -2.356222 | 0.851125  | H | 3.305333  | 2.644820  | 2.869017  |
| C | 3.432680  | -5.626187 | 2.532753  | H | 2.298360  | 1.435386  | 3.670956  |
| H | 1.673663  | -6.880945 | 2.346577  | C | -2.972947 | -1.033646 | -3.631455 |
| H | 5.005154  | -4.170994 | 2.540483  | H | -2.022634 | -1.565298 | -3.523084 |
| H | 4.972744  | -2.103157 | 1.280730  | C | -2.683898 | 0.269196  | -4.381865 |
| H | 3.916050  | -6.278868 | 3.253182  | H | -2.165861 | 0.040015  | -5.319266 |
| C | 3.958370  | -0.116154 | -0.278902 | H | -2.046288 | 0.935114  | -3.798311 |
| C | 4.386410  | 0.191638  | -1.586371 | H | -3.603371 | 0.804419  | -4.642465 |
| C | 4.083351  | 0.843239  | 0.749186  | C | -3.924247 | -1.899347 | -4.470227 |
| C | 4.954018  | 1.440387  | -1.838046 | H | -4.887320 | -1.390307 | -4.597688 |
| C | 4.662732  | 2.077090  | 0.451981  | H | -4.120096 | -2.869025 | -4.003391 |
| C | 5.104255  | 2.396860  | -0.832387 | H | -3.501548 | -2.078549 | -5.465016 |
| H | 5.267989  | 1.684563  | -2.850220 | C | -3.378890 | -2.282289 | 1.319846  |
| H | 4.788459  | 2.807692  | 1.247187  | H | -2.347438 | -2.622053 | 1.183527  |
| C | -3.172336 | -1.619174 | -1.139181 | C | -3.427339 | -1.532700 | 2.653237  |
| C | -3.752575 | -1.410585 | 0.129941  | H | -4.456273 | -1.318943 | 2.964574  |
| C | -3.552908 | -0.823409 | -2.238882 | H | -2.882540 | -0.583101 | 2.591431  |
| C | -4.728278 | -0.425041 | 0.273025  | H | -2.964059 | -2.140669 | 3.438059  |
| C | -4.525220 | 0.162183  | -2.045678 | C | -4.279374 | -3.523073 | 1.365888  |
| C | -5.125978 | 0.372208  | -0.803661 | H | -4.200340 | -4.105612 | 0.441883  |
| H | -5.204223 | -0.277591 | 1.238498  | H | -5.327864 | -3.228911 | 1.493578  |
| H | -4.805700 | 0.802894  | -2.877131 | H | -4.000810 | -4.170363 | 2.204685  |
| O | 1.509510  | -0.961719 | -1.389150 | O | -0.459143 | 0.429841  | -2.001294 |
| O | -0.609173 | -1.302656 | -0.076473 | S | -1.311365 | 3.192959  | 2.604764  |
| P | 0.255807  | -0.107214 | -0.792080 | O | -2.035148 | 2.365397  | -1.659800 |
| O | 0.649553  | 0.796666  | 0.334386  | C | -1.498319 | 4.581199  | -0.200346 |
| C | 4.279764  | -0.794715 | -2.740478 | C | -2.752533 | 5.206568  | -0.246872 |
| H | 3.766995  | -1.693660 | -2.387408 | C | -0.331251 | 5.357030  | -0.237903 |
| C | 5.673440  | -1.223431 | -3.215214 | C | -2.830634 | 6.589688  | -0.341329 |
| H | 6.251240  | -1.665591 | -2.396433 | H | -3.665391 | 4.619559  | -0.214917 |
| H | 6.237699  | -0.367617 | -3.603623 | C | -0.414730 | 6.740638  | -0.327342 |
| H | 5.592968  | -1.965341 | -4.017321 | H | 0.635746  | 4.862975  | -0.189547 |
| C | 3.458883  | -0.221772 | -3.900111 | C | -1.664668 | 7.355761  | -0.381316 |
| H | 2.470028  | 0.100651  | -3.561134 | H | -3.801138 | 7.073457  | -0.383185 |
| H | 3.324591  | -0.981494 | -4.677953 | H | 0.490503  | 7.338190  | -0.355380 |
| H | 3.963000  | 0.636446  | -4.359145 | H | -1.732489 | 8.437112  | -0.453509 |
| C | 3.618487  | 0.592333  | 2.176461  | H | -3.460053 | 2.512365  | -0.132429 |
| H | 3.015668  | -0.319093 | 2.182691  | C | -6.138425 | 1.443855  | -0.623359 |
| C | 4.814161  | 0.375574  | 3.111553  | C | -7.084831 | 1.709959  | -1.621037 |

|                                        |           |           |           |   |           |           |           |
|----------------------------------------|-----------|-----------|-----------|---|-----------|-----------|-----------|
| C                                      | -6.161379 | 2.220045  | 0.544084  | H | -0.050807 | -4.657366 | -0.975856 |
| C                                      | -8.026822 | 2.721186  | -1.457503 | C | 0.579204  | 2.334464  | -0.932687 |
| H                                      | -7.093723 | 1.104049  | -2.522746 | C | -0.481337 | 3.213491  | -1.000822 |
| C                                      | -7.101270 | 3.235137  | 0.706077  | C | -0.322037 | 4.412395  | -1.770046 |
| H                                      | -5.425208 | 2.038352  | 1.323821  | C | 0.953523  | 4.707435  | -2.329513 |
| C                                      | -8.038050 | 3.488385  | -0.293831 | C | 2.037175  | 3.812700  | -2.119611 |
| H                                      | -8.758858 | 2.905132  | -2.238235 | C | 1.870713  | 2.628902  | -1.445272 |
| H                                      | -7.098492 | 3.830879  | 1.614055  | H | -2.378892 | 5.082902  | -1.620393 |
| H                                      | -8.773314 | 4.277007  | -0.166641 | C | -1.394357 | 5.312201  | -2.015985 |
| C                                      | 5.709301  | 3.722097  | -1.121095 | C | 1.125646  | 5.899854  | -3.080671 |
| C                                      | 6.781621  | 3.842867  | -2.014167 | H | 3.020208  | 4.083461  | -2.497869 |
| C                                      | 5.219319  | 4.881360  | -0.505717 | C | 0.075285  | 6.756742  | -3.288989 |
| C                                      | 7.348149  | 5.085321  | -2.283545 | C | -1.199662 | 6.451690  | -2.756427 |
| H                                      | 7.189110  | 2.951459  | -2.483424 | H | 2.107956  | 6.113117  | -3.494462 |
| C                                      | 5.785915  | 6.123855  | -0.774015 | H | 0.215112  | 7.664509  | -3.867883 |
| H                                      | 4.372481  | 4.808787  | 0.171550  | H | -2.032531 | 7.123519  | -2.940593 |
| C                                      | 6.852765  | 6.230968  | -1.664114 | C | -1.727756 | 2.888680  | -0.256172 |
| H                                      | 8.183823  | 5.156970  | -2.973512 | C | -2.255524 | 3.755104  | 0.756689  |
| H                                      | 5.387244  | 7.012160  | -0.292751 | C | -2.340943 | 1.671040  | -0.461689 |
| H                                      | 7.295250  | 7.200442  | -1.872591 | C | -1.605804 | 4.955529  | 1.155023  |
|                                        |           |           |           | C | -3.444175 | 3.368570  | 1.439161  |
|                                        |           |           |           | C | -3.522109 | 1.257809  | 0.214134  |
|                                        |           |           |           | C | -2.129624 | 5.741472  | 2.151592  |
|                                        |           |           |           | H | -0.674177 | 5.239864  | 0.677904  |
|                                        |           |           |           | C | -3.968981 | 4.211052  | 2.455967  |
|                                        |           |           |           | C | -4.063676 | 2.129465  | 1.127754  |
|                                        |           |           |           | C | -3.330282 | 5.374098  | 2.804444  |
|                                        |           |           |           | H | -1.612984 | 6.649569  | 2.447180  |
|                                        |           |           |           | H | -4.880698 | 3.905140  | 2.962739  |
|                                        |           |           |           | H | -4.977550 | 1.859081  | 1.650961  |
|                                        |           |           |           | H | -3.734976 | 6.008324  | 3.587131  |
|                                        |           |           |           | C | -4.139819 | -0.073055 | -0.074869 |
|                                        |           |           |           | C | -4.712013 | -0.317734 | -1.340471 |
|                                        |           |           |           | C | -4.171551 | -1.074433 | 0.919430  |
|                                        |           |           |           | C | -5.329499 | -1.545018 | -1.580333 |
|                                        |           |           |           | C | -4.804212 | -2.285333 | 0.635096  |
|                                        |           |           |           | C | -5.390983 | -2.541273 | -0.604982 |
|                                        |           |           |           | H | -5.760267 | -1.737939 | -2.560098 |
|                                        |           |           |           | H | -4.862118 | -3.046008 | 1.409872  |
|                                        |           |           |           | C | 3.014214  | 1.708940  | -1.157026 |
|                                        |           |           |           | C | 3.599726  | 1.735368  | 0.126061  |
|                                        |           |           |           | C | 3.498897  | 0.833044  | -2.145086 |
|                                        |           |           |           | C | 4.712216  | 0.933552  | 0.373619  |
|                                        |           |           |           | C | 4.616436  | 0.046636  | -1.854347 |
| <b>M-(R)-5-TS1-S E= -3994.06874784</b> |           |           |           |   |           |           |           |
| H                                      | 0.375201  | -2.113383 | -2.261597 |   |           |           |           |
| C                                      | -0.506999 | 1.191691  | 2.945472  |   |           |           |           |
| C                                      | 0.289989  | 0.170404  | 3.464903  |   |           |           |           |
| C                                      | 0.888357  | 0.283825  | 4.725323  |   |           |           |           |
| C                                      | 0.652901  | 1.434478  | 5.471663  |   |           |           |           |
| C                                      | -0.149800 | 2.458701  | 4.971311  |   |           |           |           |
| C                                      | -0.723770 | 2.337227  | 3.706811  |   |           |           |           |
| H                                      | -0.943130 | 1.086213  | 1.955745  |   |           |           |           |
| H                                      | 1.110873  | 1.528441  | 6.453142  |   |           |           |           |
| H                                      | -0.326451 | 3.350108  | 5.565164  |   |           |           |           |
| H                                      | -1.346975 | 3.133844  | 3.310641  |   |           |           |           |
| C                                      | 1.800099  | -0.829299 | 5.167000  |   |           |           |           |
| H                                      | 2.810836  | -0.648480 | 4.774334  |   |           |           |           |
| H                                      | 1.877656  | -0.858193 | 6.257433  |   |           |           |           |
| C                                      | 1.285619  | -2.168125 | 4.640238  |   |           |           |           |
| H                                      | 1.973375  | -2.984333 | 4.861949  |   |           |           |           |
| H                                      | 0.321260  | -2.406949 | 5.112530  |   |           |           |           |
| C                                      | 1.026323  | -2.123981 | 3.152345  |   |           |           |           |
| N                                      | 0.537808  | -0.982832 | 2.680789  |   |           |           |           |
| H                                      | 0.188115  | -0.959783 | 1.705277  |   |           |           |           |
| C                                      | 0.157176  | -3.591480 | -0.927073 |   |           |           |           |
| C                                      | 1.500588  | -3.174851 | -0.533841 |   |           |           |           |



|   |           |           |           |   |           |           |           |
|---|-----------|-----------|-----------|---|-----------|-----------|-----------|
| C | -0.218047 | -1.215464 | 3.007764  | C | -1.050332 | -5.931752 | 2.250091  |
| C | -0.403360 | 0.059531  | 3.543669  | H | -2.208385 | -4.762040 | 0.897316  |
| C | -0.958004 | 0.241027  | 4.815813  | C | 1.319749  | -5.498587 | 2.338363  |
| C | -1.299405 | -0.884710 | 5.559465  | C | 2.296785  | -3.716625 | 0.938539  |
| C | -1.104848 | -2.165635 | 5.044899  | C | 0.232079  | -6.206569 | 2.781978  |
| C | -0.569538 | -2.327945 | 3.768354  | H | -1.913729 | -6.477084 | 2.619161  |
| H | 0.190602  | -1.324708 | 2.006392  | H | 2.308541  | -5.682482 | 2.750716  |
| H | -1.728403 | -0.750943 | 6.549285  | H | 3.268537  | -3.936257 | 1.373775  |
| H | -1.373932 | -3.035034 | 5.636403  | H | 0.348854  | -6.967947 | 3.546912  |
| H | -0.420591 | -3.323410 | 3.361499  | C | 3.326617  | -1.809473 | -0.335182 |
| C | -1.201272 | 1.652510  | 5.275089  | C | 3.833501  | -1.844081 | -1.645997 |
| H | -2.171280 | 1.997545  | 4.889373  | C | 3.913587  | -0.947065 | 0.618096  |
| H | -1.250336 | 1.703421  | 6.366358  | C | 4.927192  | -1.038101 | -1.980154 |
| C | -0.095806 | 2.567576  | 4.753362  | C | 5.005409  | -0.168378 | 0.236518  |
| H | -0.290252 | 3.614831  | 4.985776  | C | 5.534565  | -0.190315 | -1.057370 |
| H | 0.863679  | 2.297366  | 5.218564  | H | 5.305756  | -1.088795 | -2.996186 |
| C | 0.102920  | 2.418947  | 3.262901  | H | 5.456598  | 0.485867  | 0.979038  |
| N | -0.056076 | 1.195346  | 2.771051  | C | -3.663822 | 0.296021  | -1.076561 |
| H | 0.201253  | 1.018914  | 1.783588  | C | -4.057114 | 0.761361  | 0.196097  |
| C | -0.483491 | 3.588214  | -0.779687 | C | -3.621409 | 1.181236  | -2.166731 |
| C | 0.917487  | 3.494456  | -0.376251 | C | -4.441095 | 2.092231  | 0.337398  |
| H | -1.150066 | 2.817294  | -0.386781 | C | -4.008443 | 2.514381  | -1.972031 |
| H | 1.275885  | 2.487484  | -0.178434 | C | -4.426799 | 2.994059  | -0.732531 |
| C | -1.988422 | -1.560049 | -0.763188 | H | -4.758531 | 2.442024  | 1.315643  |
| C | -1.537272 | -2.862358 | -0.841145 | H | -3.970385 | 3.187171  | -2.821814 |
| C | -2.347535 | -3.817150 | -1.539662 | O | 0.757824  | -1.437673 | -1.437224 |
| C | -3.632561 | -3.418864 | -2.006234 | O | -1.218764 | -0.616391 | -0.117644 |
| C | -4.067536 | -2.079532 | -1.820377 | P | 0.124612  | -0.050700 | -0.860684 |
| C | -3.257513 | -1.134374 | -1.242696 | O | 0.950414  | 0.527264  | 0.247696  |
| H | -0.920371 | -5.448768 | -1.492795 | C | 3.263701  | -2.756215 | -2.722753 |
| C | -1.913084 | -5.143572 | -1.807421 | H | 2.379093  | -3.259975 | -2.323963 |
| C | -4.455187 | -4.363651 | -2.674754 | C | 4.274480  | -3.846850 | -3.097319 |
| H | -5.062230 | -1.802376 | -2.159644 | H | 4.558343  | -4.438342 | -2.220197 |
| C | -4.017147 | -5.643404 | -2.899104 | H | 5.187132  | -3.411095 | -3.520080 |
| C | -2.725598 | -6.030557 | -2.469437 | H | 3.848405  | -4.525625 | -3.844431 |
| H | -5.436257 | -4.043676 | -3.016246 | C | 2.823372  | -1.967069 | -3.959808 |
| H | -4.650916 | -6.357158 | -3.416312 | H | 2.113736  | -1.179408 | -3.689310 |
| H | -2.371842 | -7.037206 | -2.670764 | H | 2.338325  | -2.634378 | -4.680823 |
| C | -0.233061 | -3.211238 | -0.210760 | H | 3.679234  | -1.502535 | -4.462747 |
| C | -0.105015 | -4.237794 | 0.783274  | C | 3.412452  | -0.835805 | 2.051270  |
| C | 0.883774  | -2.460789 | -0.518733 | H | 2.429368  | -1.310616 | 2.105052  |
| C | -1.215820 | -4.974348 | 1.279411  | C | 4.351209  | -1.572461 | 3.015114  |
| C | 1.179581  | -4.493862 | 1.343543  | H | 4.461369  | -2.629027 | 2.751108  |
| C | 2.172337  | -2.682919 | 0.043129  | H | 3.970561  | -1.514500 | 4.041162  |

|   |           |           |           |                                        |           |           |           |
|---|-----------|-----------|-----------|----------------------------------------|-----------|-----------|-----------|
| H | 5.350236  | -1.119943 | 2.998283  | H                                      | -4.169368 | 4.541836  | 1.579441  |
| C | 3.239364  | 0.617819  | 2.506518  | H                                      | -2.956761 | 5.036486  | 0.389868  |
| H | 2.625736  | 1.180980  | 1.797927  | H                                      | -4.314124 | 6.112058  | 0.778945  |
| H | 4.203928  | 1.126362  | 2.616689  | H                                      | -5.313697 | 4.943956  | -2.583573 |
| H | 2.747034  | 0.640899  | 3.486707  | H                                      | -5.001150 | 6.334695  | -1.536496 |
| C | -3.184601 | 0.728196  | -3.553057 | H                                      | -3.652314 | 5.330847  | -2.092994 |
| H | -2.543608 | -0.150848 | -3.429082 | H                                      | -6.679276 | 5.491236  | 0.083275  |
| C | -2.370791 | 1.787441  | -4.302779 | H                                      | -6.972099 | 4.030407  | -0.883281 |
| H | -1.897059 | 1.335667  | -5.180598 | H                                      | -6.516090 | 3.888619  | 0.823432  |
| H | -1.585958 | 2.212013  | -3.672156 | C                                      | 6.730430  | 0.701129  | -1.404223 |
| H | -3.005345 | 2.606310  | -4.661349 | C                                      | 7.164990  | 0.544244  | -2.864190 |
| C | -4.400580 | 0.329361  | -4.400702 | C                                      | 6.352998  | 2.174034  | -1.170035 |
| H | -5.074978 | 1.185742  | -4.522005 | C                                      | 7.920020  | 0.333573  | -0.502353 |
| H | -4.971067 | -0.484029 | -3.943324 | H                                      | 7.473765  | -0.483277 | -3.086253 |
| H | -4.082931 | 0.003974  | -5.397740 | H                                      | 6.362099  | 0.820096  | -3.556645 |
| C | -4.107255 | -0.173545 | 1.396008  | H                                      | 8.019144  | 1.200079  | -3.064758 |
| H | -3.354402 | -0.954936 | 1.251172  | H                                      | 6.079091  | 2.358110  | -0.125093 |
| C | -3.770758 | 0.524693  | 2.715963  | H                                      | 7.201514  | 2.824480  | -1.414828 |
| H | -4.580809 | 1.185136  | 3.046848  | H                                      | 5.506180  | 2.462811  | -1.803035 |
| H | -2.857356 | 1.122497  | 2.618985  | H                                      | 8.784700  | 0.964213  | -0.740464 |
| H | -3.610108 | -0.221315 | 3.501963  | H                                      | 7.683218  | 0.474588  | 0.557285  |
| C | -5.478826 | -0.854450 | 1.480369  | H                                      | 8.210178  | -0.712871 | -0.648222 |
| H | -5.700074 | -1.417888 | 0.567819  |                                        |           |           |           |
| H | -6.268250 | -0.105735 | 1.616111  |                                        |           |           |           |
| H | -5.515373 | -1.547585 | 2.328187  |                                        |           |           |           |
| O | -0.218741 | 0.764296  | -2.076428 | <b>M-(R)-6-TS1-S E= -3846.45961110</b> |           |           |           |
| S | 0.578836  | 3.738046  | 2.329752  | H                                      | 0.494993  | -2.213909 | -2.259826 |
| O | 0.100135  | 3.257679  | -2.047793 | C                                      | -0.690129 | 0.905466  | 3.005089  |
| C | 1.898805  | 4.563737  | -0.470325 | C                                      | 0.105423  | -0.119889 | 3.517825  |
| C | 1.535803  | 5.911862  | -0.590944 | C                                      | 0.669270  | -0.037553 | 4.795771  |
| C | 3.254301  | 4.205483  | -0.422983 | C                                      | 0.401171  | 1.088749  | 5.568133  |
| C | 2.521731  | 6.886591  | -0.673101 | C                                      | -0.402094 | 2.116527  | 5.075569  |
| H | 0.488675  | 6.197947  | -0.613448 | C                                      | -0.942496 | 2.024638  | 3.793824  |
| C | 4.236486  | 5.183065  | -0.511849 | H                                      | -1.095499 | 0.821951  | 1.999820  |
| H | 3.523022  | 3.156562  | -0.319069 | H                                      | 0.832457  | 1.160665  | 6.563465  |
| C | 3.868678  | 6.522696  | -0.637571 | H                                      | -0.605894 | 2.988043  | 5.689864  |
| H | 2.243304  | 7.931468  | -0.764296 | H                                      | -1.566563 | 2.824208  | 3.405495  |
| H | 5.285343  | 4.903755  | -0.482809 | C                                      | 1.577449  | -1.158047 | 5.226530  |
| H | 4.635047  | 7.288981  | -0.706379 | H                                      | 2.593801  | -0.965151 | 4.854794  |
| H | -0.951151 | 4.570177  | -0.807992 | H                                      | 1.636302  | -1.213942 | 6.317012  |
| C | -4.863543 | 4.443658  | -0.501363 | C                                      | 1.075327  | -2.484804 | 4.657432  |
| C | -4.026074 | 5.064980  | 0.628737  | H                                      | 1.758667  | -3.305881 | 4.875197  |
| C | -4.694826 | 5.305994  | -1.755446 | H                                      | 0.100630  | -2.735065 | 5.101843  |
| C | -6.346166 | 4.461720  | -0.094230 | C                                      | 0.852007  | -2.403021 | 3.165443  |
|   |           |           |           | N                                      | 0.384839  | -1.248664 | 2.709685  |
|   |           |           |           | H                                      | 0.079330  | -1.190858 | 1.719190  |

|   |           |           |           |   |           |           |           |
|---|-----------|-----------|-----------|---|-----------|-----------|-----------|
| C | 0.091401  | -3.718683 | -1.000334 | C | 4.848453  | 1.025666  | 0.454579  |
| C | 1.423103  | -3.376856 | -0.504126 | C | 4.773664  | 0.254232  | -1.802603 |
| H | -0.156481 | -4.772692 | -1.101955 | C | 5.433915  | 0.281046  | -0.574702 |
| C | 0.590982  | 2.273993  | -0.766286 | H | 5.328593  | 1.051807  | 1.429910  |
| C | -0.504165 | 3.113275  | -0.825255 | H | 5.179465  | -0.334755 | -2.618315 |
| C | -0.367035 | 4.363666  | -1.513660 | O | -1.644779 | 0.688218  | -1.456270 |
| C | 0.914554  | 4.746282  | -2.000742 | O | 0.478568  | 1.048659  | -0.145561 |
| C | 2.022669  | 3.877540  | -1.817182 | P | -0.372046 | -0.149314 | -0.873628 |
| C | 1.881937  | 2.644412  | -1.230236 | O | -0.779331 | -1.065482 | 0.237986  |
| H | -2.457471 | 4.934291  | -1.421955 | C | -4.423646 | 0.431689  | -2.776012 |
| C | -1.467845 | 5.230501  | -1.754112 | H | -3.962855 | 1.332432  | -2.361758 |
| C | 1.064416  | 5.992225  | -2.665880 | C | -5.845546 | 0.809885  | -3.208070 |
| H | 3.004428  | 4.203562  | -2.152602 | H | -6.439035 | 1.154422  | -2.354423 |
| C | -0.012926 | 6.816785  | -2.864786 | H | -6.363367 | -0.045892 | -3.656213 |
| C | -1.294324 | 6.422703  | -2.412164 | H | -5.817565 | 1.612987  | -3.952941 |
| H | 2.052290  | 6.273753  | -3.021323 | C | -3.584092 | -0.004162 | -3.981986 |
| H | 0.110510  | 7.765929  | -3.377088 | H | -2.575481 | -0.294680 | -3.673727 |
| H | -2.149125 | 7.067296  | -2.593314 | H | -3.500971 | 0.816868  | -4.702667 |
| C | -1.780938 | 2.684723  | -0.189997 | H | -4.045538 | -0.853358 | -4.499019 |
| C | -2.439106 | 3.456192  | 0.824898  | C | -3.606403 | -1.300815 | 2.005252  |
| C | -2.312921 | 1.457743  | -0.524943 | H | -3.024378 | -0.377760 | 2.071179  |
| C | -1.901850 | 4.664084  | 1.348937  | C | -4.792045 | -1.187400 | 2.972116  |
| C | -3.658553 | 2.964762  | 1.373268  | H | -5.451260 | -0.351642 | 2.717504  |
| C | -3.519614 | 0.937822  | 0.020331  | H | -4.435987 | -1.040154 | 3.998112  |
| C | -2.555109 | 5.353530  | 2.341250  | H | -5.394105 | -2.103827 | 2.951629  |
| H | -0.954197 | 5.032099  | 0.970867  | C | -2.688990 | -2.448284 | 2.444224  |
| C | -4.316199 | 3.707218  | 2.389926  | H | -1.881336 | -2.601404 | 1.723438  |
| C | -4.181980 | 1.720946  | 0.933079  | H | -3.241266 | -3.388585 | 2.555743  |
| C | -3.780792 | 4.876888  | 2.865061  | H | -2.244824 | -2.214515 | 3.419941  |
| H | -2.123619 | 6.269343  | 2.733633  | C | 2.922797  | 0.888081  | -3.396480 |
| H | -5.247808 | 3.318541  | 2.792778  | H | 1.877634  | 1.189286  | -3.271848 |
| H | -5.120456 | 1.372517  | 1.356522  | C | 2.920154  | -0.536246 | -3.961443 |
| H | -4.286927 | 5.432694  | 3.648259  | H | 2.254353  | -0.588787 | -4.829416 |
| C | -4.023799 | -0.411181 | -0.380511 | H | 2.566631  | -1.257790 | -3.219641 |
| C | -4.452868 | -0.643075 | -1.699005 | H | 3.918324  | -0.841930 | -4.295809 |
| C | -4.083572 | -1.457587 | 0.567787  | C | 3.586997  | 1.847686  | -4.391363 |
| C | -4.955815 | -1.901938 | -2.044835 | H | 4.648294  | 1.599789  | -4.514691 |
| C | -4.599790 | -2.690845 | 0.174405  | H | 3.520477  | 2.887263  | -4.055085 |
| C | -5.045237 | -2.944427 | -1.126113 | H | 3.106187  | 1.776195  | -5.373484 |
| H | -5.287242 | -2.053439 | -3.067318 | C | 3.087707  | 2.522869  | 1.446878  |
| H | -4.649160 | -3.487968 | 0.912281  | H | 2.052519  | 2.783752  | 1.206638  |
| C | 3.061968  | 1.754507  | -0.996542 | C | 3.047027  | 1.686194  | 2.729804  |
| C | 3.670072  | 1.746443  | 0.275008  | H | 4.049866  | 1.523690  | 3.141390  |
| C | 3.591860  | 0.970109  | -2.032559 | H | 2.592124  | 0.707834  | 2.541245  |



|   |           |           |           |
|---|-----------|-----------|-----------|
| H | 2.452720  | 2.197966  | 3.495320  |
| C | 3.858581  | 3.829073  | 1.666270  |
| H | 3.833725  | 4.458198  | 0.769905  |
| H | 4.908716  | 3.621129  | 1.903622  |
| H | 3.427487  | 4.398638  | 2.497127  |
| O | 0.352401  | -0.692299 | -2.072788 |
| S | 1.133441  | -3.741233 | 2.177469  |
| O | 0.670502  | -3.221055 | -2.222268 |
| H | -0.729270 | -3.112923 | -0.621101 |
| H | 1.585680  | -2.326317 | -0.281790 |
| C | 2.584589  | -4.253362 | -0.581468 |
| C | 2.450162  | -5.647612 | -0.641570 |
| C | 3.862648  | -3.676124 | -0.577264 |
| C | 3.581074  | -6.451483 | -0.702619 |
| H | 1.466006  | -6.104983 | -0.623956 |
| C | 4.990355  | -4.485150 | -0.642169 |
| H | 3.959792  | -2.593029 | -0.528738 |
| C | 4.849265  | -5.871262 | -0.704860 |
| H | 3.474859  | -7.530582 | -0.743814 |
| H | 5.980439  | -4.039515 | -0.637029 |
| H | 5.731867  | -6.502025 | -0.749301 |
| C | 6.759468  | -0.445428 | -0.328372 |
| C | 6.646830  | -1.348106 | 0.910900  |
| C | 7.169641  | -1.312251 | -1.522890 |
| C | 7.859033  | 0.601456  | -0.084026 |
| H | 6.437346  | -0.772622 | 1.817963  |
| H | 5.847150  | -2.087765 | 0.794256  |
| H | 7.588924  | -1.885868 | 1.070208  |
| H | 7.354294  | -0.708762 | -2.418227 |
| H | 8.095295  | -1.849195 | -1.287806 |
| H | 6.400470  | -2.054435 | -1.767044 |
| H | 8.822125  | 0.108409  | 0.093578  |
| H | 7.966748  | 1.262924  | -0.950794 |
| H | 7.629474  | 1.221998  | 0.788638  |
| C | -5.586362 | -4.330813 | -1.485252 |
| C | -6.043007 | -4.414199 | -2.944368 |
| C | -4.481006 | -5.376794 | -1.263279 |
| C | -6.786261 | -4.662821 | -0.583336 |
| H | -6.847049 | -3.701049 | -3.157580 |
| H | -5.217844 | -4.220835 | -3.638457 |
| H | -6.424715 | -5.419895 | -3.151515 |
| H | -4.148969 | -5.397110 | -0.220005 |
| H | -4.848839 | -6.377347 | -1.519950 |
| H | -3.609858 | -5.159848 | -1.891851 |

|   |           |           |           |
|---|-----------|-----------|-----------|
| H | -7.182606 | -5.654607 | -0.830997 |
| H | -6.507954 | -4.668489 | 0.475530  |
| H | -7.589338 | -3.929856 | -0.718330 |

**M-(R)-7-TS1-R E= -4608.54088692**

|   |           |           |           |
|---|-----------|-----------|-----------|
| H | 0.073866  | -1.625632 | -1.714403 |
| C | 0.042104  | 2.381591  | 3.016231  |
| C | 0.472873  | 1.231478  | 3.678181  |
| C | 1.115548  | 1.299122  | 4.918667  |
| C | 1.298743  | 2.548322  | 5.504117  |
| C | 0.862092  | 3.706755  | 4.862851  |
| C | 0.238745  | 3.621699  | 3.619045  |
| H | -0.431687 | 2.295891  | 2.041245  |
| H | 1.794859  | 2.610645  | 6.469434  |
| H | 1.009725  | 4.674599  | 5.331668  |
| H | -0.100192 | 4.522141  | 3.115385  |
| C | 1.617203  | 0.009969  | 5.510213  |
| H | 2.604140  | -0.223405 | 5.085214  |
| H | 1.743773  | 0.101583  | 6.592534  |
| C | 0.646821  | -1.124005 | 5.184659  |
| H | 1.025157  | -2.091587 | 5.515990  |
| H | -0.313406 | -0.952948 | 5.693057  |
| C | 0.335906  | -1.193720 | 3.707744  |
| N | 0.286845  | -0.031833 | 3.066156  |
| H | -0.028735 | -0.020895 | 2.079841  |
| C | 0.757066  | -2.777564 | -0.257515 |
| C | -0.617922 | -2.815058 | 0.232171  |
| H | 1.332057  | -1.891347 | 0.015726  |
| H | -1.080288 | -1.843798 | 0.387566  |
| C | 1.620015  | 2.646768  | -0.875965 |
| C | 0.919315  | 3.821564  | -1.060868 |
| C | 1.492148  | 4.825113  | -1.910067 |
| C | 2.803076  | 4.626013  | -2.427709 |
| C | 3.501537  | 3.424623  | -2.132100 |
| C | 2.923287  | 2.420036  | -1.397160 |
| H | -0.224479 | 6.150628  | -1.928414 |
| C | 0.790976  | 6.004478  | -2.281450 |
| C | 3.386088  | 5.624871  | -3.251829 |
| H | 4.513658  | 3.303353  | -2.509592 |
| C | 2.693188  | 6.763774  | -3.573796 |
| C | 1.376254  | 6.946744  | -3.090203 |
| H | 4.390982  | 5.460580  | -3.632177 |
| H | 3.144994  | 7.519042  | -4.209425 |
| H | 0.820764  | 7.837558  | -3.367005 |

|   |           |           |           |   |           |           |           |
|---|-----------|-----------|-----------|---|-----------|-----------|-----------|
| C | -0.411215 | 3.982178  | -0.410624 | H | -3.738183 | 1.017053  | -4.374104 |
| C | -0.728627 | 5.074972  | 0.462387  | C | -3.539344 | 1.280523  | 2.234607  |
| C | -1.362235 | 3.000873  | -0.593711 | H | -2.713669 | 1.997251  | 2.232511  |
| C | 0.221930  | 6.065439  | 0.831640  | C | -4.699772 | 1.885830  | 3.035229  |
| C | -2.034577 | 5.144100  | 1.028114  | H | -5.059869 | 2.820824  | 2.593899  |
| C | -2.667878 | 3.038372  | -0.027561 | H | -4.390870 | 2.090530  | 4.066484  |
| C | -0.117201 | 7.081858  | 1.690643  | H | -5.544725 | 1.187155  | 3.067606  |
| H | 1.231819  | 6.003243  | 0.440957  | C | -3.036979 | 0.008590  | 2.927644  |
| C | -2.357118 | 6.214511  | 1.905025  | H | -2.295431 | -0.506910 | 2.310553  |
| C | -2.985027 | 4.125808  | 0.747818  | H | -3.854973 | -0.687902 | 3.144623  |
| C | -1.423292 | 7.165353  | 2.229001  | H | -2.571163 | 0.268725  | 3.886000  |
| H | 0.625989  | 7.824154  | 1.965892  | C | 3.089664  | 0.272659  | -3.448661 |
| H | -3.359539 | 6.256022  | 2.323248  | H | 2.283277  | 1.008657  | -3.368316 |
| H | -3.975969 | 4.205767  | 1.187275  | C | 2.472949  | -1.029486 | -3.969110 |
| H | -1.678484 | 7.976641  | 2.903699  | H | 1.867069  | -0.818969 | -4.856738 |
| C | -3.591980 | 1.888263  | -0.271697 | H | 1.827799  | -1.494735 | -3.219653 |
| C | -4.019370 | 1.602863  | -1.585296 | H | 3.242578  | -1.751926 | -4.264254 |
| C | -3.958820 | 1.037126  | 0.792963  | C | 4.126012  | 0.787314  | -4.456918 |
| C | -4.786370 | 0.460972  | -1.818113 | H | 4.960190  | 0.079336  | -4.538770 |
| C | -4.730084 | -0.092804 | 0.513087  | H | 4.536675  | 1.757945  | -4.163507 |
| C | -5.127289 | -0.409704 | -0.785103 | H | 3.674901  | 0.895308  | -5.449570 |
| H | -5.104697 | 0.224639  | -2.830774 | C | 4.077186  | 2.001996  | 1.272909  |
| H | -5.007994 | -0.765817 | 1.321117  | H | 3.236135  | 2.657614  | 1.028765  |
| C | 3.628230  | 1.134884  | -1.094854 | C | 3.777671  | 1.388249  | 2.643746  |
| C | 4.192343  | 0.947464  | 0.182623  | H | 4.646044  | 0.858511  | 3.051983  |
| C | 3.715800  | 0.121716  | -2.070145 | H | 2.943467  | 0.680340  | 2.578364  |
| C | 4.895674  | -0.228304 | 0.444391  | H | 3.503055  | 2.174704  | 3.355597  |
| C | 4.413407  | -1.048431 | -1.758764 | C | 5.343833  | 2.863876  | 1.321513  |
| C | 5.017731  | -1.234175 | -0.514871 | H | 5.525497  | 3.354666  | 0.359303  |
| H | 5.355274  | -0.376256 | 1.418482  | H | 6.219376  | 2.248010  | 1.558418  |
| H | 4.491325  | -1.840295 | -2.499257 | H | 5.253800  | 3.639060  | 2.090470  |
| O | -1.045169 | 1.919473  | -1.388974 | O | 0.300269  | -0.139092 | -1.794925 |
| O | 1.083324  | 1.653101  | -0.083895 | S | -0.013617 | -2.667015 | 2.968590  |
| P | -0.152104 | 0.757007  | -0.676019 | O | 0.070600  | -2.635102 | -1.512679 |
| O | -0.831802 | 0.187689  | 0.531443  | C | -1.451998 | -3.996138 | 0.313002  |
| C | -3.693350 | 2.500300  | -2.769943 | C | -0.968559 | -5.283747 | 0.037143  |
| H | -2.986303 | 3.267520  | -2.443047 | C | -2.801484 | -3.814016 | 0.654022  |
| C | -4.957989 | 3.220177  | -3.254083 | C | -1.830796 | -6.369886 | 0.097614  |
| H | -5.405700 | 3.817089  | -2.452257 | H | 0.070860  | -5.433874 | -0.237868 |
| H | -5.708937 | 2.500292  | -3.599508 | C | -3.657763 | -4.904091 | 0.724504  |
| H | -4.722239 | 3.888809  | -4.089338 | H | -3.166062 | -2.809127 | 0.857098  |
| C | -3.036427 | 1.722592  | -3.915398 | C | -3.171148 | -6.180226 | 0.440774  |
| H | -2.164713 | 1.163084  | -3.562964 | H | -1.461910 | -7.366213 | -0.123413 |
| H | -2.707077 | 2.414404  | -4.698318 | H | -4.702299 | -4.758694 | 0.981599  |

|   |            |           |           |
|---|------------|-----------|-----------|
| H | -3.841153  | -7.034033 | 0.482059  |
| H | 1.351380   | -3.688222 | -0.220784 |
| C | 5.767723   | -2.486599 | -0.208629 |
| C | 6.958697   | -2.781803 | -0.906818 |
| C | 5.289213   | -3.372468 | 0.781166  |
| C | 7.677687   | -3.990463 | -0.609336 |
| C | 6.024883   | -4.571819 | 1.077322  |
| C | 7.197174   | -4.853366 | 0.375697  |
| H | 7.747196   | -5.764443 | 0.601278  |
| C | -5.833021  | -1.694629 | -1.056484 |
| C | -7.154505  | -1.892196 | -0.609373 |
| C | -5.142958  | -2.731781 | -1.721151 |
| C | -7.798438  | -3.158827 | -0.827894 |
| C | -5.797001  | -3.995234 | -1.930992 |
| C | -7.106170  | -4.178172 | -1.482721 |
| H | -7.594357  | -5.137502 | -1.641591 |
| C | 4.378997   | -5.201277 | 2.754835  |
| H | 4.014777   | -5.886078 | 3.514572  |
| C | 3.633403   | -4.023070 | 2.453528  |
| H | 2.704348   | -3.826143 | 2.981596  |
| C | 8.665047   | -2.216473 | -2.555938 |
| H | 9.064995   | -1.533250 | -3.299022 |
| C | 9.360709   | -3.429337 | -2.273615 |
| H | 10.274781  | -3.661090 | -2.811664 |
| C | -3.785574  | -4.885794 | -2.970157 |
| H | -3.246762  | -5.700116 | -3.445250 |
| C | -3.128732  | -3.638402 | -2.756612 |
| H | -2.090368  | -3.522662 | -3.052745 |
| C | -7.902373  | -0.862610 | 0.052751  |
| C | -9.180375  | -1.082360 | 0.477376  |
| C | -9.810182  | -2.346532 | 0.271895  |
| H | -7.436929  | 0.105419  | 0.207024  |
| H | -9.729410  | -0.288013 | 0.973891  |
| H | -10.826871 | -2.500631 | 0.620496  |
| C | -5.078617  | -5.055436 | -2.571021 |
| H | -5.589158  | -6.003283 | -2.722327 |
| C | -3.782030  | -2.599296 | -2.158683 |
| H | -3.260823  | -1.661684 | -1.987531 |
| C | 8.882254   | -4.283871 | -1.325713 |
| H | 9.406869   | -5.206418 | -1.090972 |
| C | 7.511437   | -1.902855 | -1.897500 |
| H | 7.002372   | -0.970441 | -2.116259 |
| C | 4.069940   | -3.143670 | 1.504456  |
| H | 3.486470   | -2.253729 | 1.290493  |

|   |           |           |           |
|---|-----------|-----------|-----------|
| C | 5.535682  | -5.465316 | 2.083966  |
| H | 6.111238  | -6.362655 | 2.296542  |
| C | -9.139560 | -3.348779 | -0.363498 |
| H | -9.609001 | -4.314577 | -0.532494 |

**M-(R)-7-TS1-S E= -4608.53491639**

|   |           |           |           |
|---|-----------|-----------|-----------|
| H | -0.157305 | -1.541285 | -2.198978 |
| C | -0.303902 | 1.788634  | 3.073091  |
| C | 0.371409  | 0.656948  | 3.531975  |
| C | 1.075832  | 0.665202  | 4.740147  |
| C | 1.084306  | 1.834897  | 5.494481  |
| C | 0.412846  | 2.974233  | 5.052146  |
| C | -0.277619 | 2.950129  | 3.841004  |
| H | -0.836552 | 1.749206  | 2.126441  |
| H | 1.629857  | 1.851437  | 6.434616  |
| H | 0.428503  | 3.878823  | 5.651863  |
| H | -0.803825 | 3.834619  | 3.491942  |
| C | 1.825344  | -0.585755 | 5.114072  |
| H | 2.813907  | -0.576176 | 4.631794  |
| H | 1.992423  | -0.630299 | 6.193787  |
| C | 1.045876  | -1.815892 | 4.649116  |
| H | 1.592359  | -2.741240 | 4.833901  |
| H | 0.092141  | -1.878658 | 5.193526  |
| C | 0.690351  | -1.725564 | 3.183518  |
| N | 0.378124  | -0.515267 | 2.738244  |
| H | -0.015846 | -0.422689 | 1.783469  |
| C | -0.660324 | -2.928014 | -0.863474 |
| C | 0.759865  | -2.839342 | -0.526831 |
| H | -1.110735 | -3.916859 | -0.902319 |
| C | 0.896666  | 2.839982  | -0.797342 |
| C | -0.001185 | 3.886770  | -0.868992 |
| C | 0.359067  | 5.036802  | -1.647417 |
| C | 1.666040  | 5.112636  | -2.206048 |
| C | 2.580347  | 4.045164  | -2.000557 |
| C | 2.213495  | 2.905671  | -1.329577 |
| H | -1.560626 | 6.037846  | -1.521016 |
| C | -0.549486 | 6.098086  | -1.909534 |
| C | 2.035343  | 6.253882  | -2.966418 |
| H | 3.590687  | 4.138901  | -2.391604 |
| C | 1.141906  | 7.270496  | -3.187210 |
| C | -0.167868 | 7.182884  | -2.659292 |
| H | 3.040555  | 6.298514  | -3.377636 |
| H | 1.430609  | 8.136607  | -3.774487 |
| H | -0.880314 | 7.978647  | -2.854350 |

|   |           |           |           |   |           |           |           |
|---|-----------|-----------|-----------|---|-----------|-----------|-----------|
| C | -1.303834 | 3.780275  | -0.154883 | H | -4.325793 | 0.235941  | -4.021032 |
| C | -1.737129 | 4.746107  | 0.813929  | C | -3.823081 | 0.582770  | 2.538308  |
| C | -2.098016 | 2.674301  | -0.372384 | H | -3.144964 | 1.439364  | 2.508305  |
| C | -0.929741 | 5.841094  | 1.228082  | C | -4.964304 | 0.915015  | 3.506254  |
| C | -3.012243 | 4.577327  | 1.426664  | H | -5.530349 | 1.794842  | 3.182429  |
| C | -3.356108 | 2.463701  | 0.257811  | H | -4.569200 | 1.112882  | 4.508931  |
| C | -1.379619 | 6.730383  | 2.173050  | H | -5.666612 | 0.076269  | 3.580741  |
| H | 0.059646  | 5.963489  | 0.800623  | C | -3.015517 | -0.614590 | 3.054963  |
| C | -3.455495 | 5.522956  | 2.389504  | H | -2.246080 | -0.897239 | 2.330846  |
| C | -3.803098 | 3.441900  | 1.111579  | H | -3.655811 | -1.485432 | 3.238092  |
| C | -2.660907 | 6.578873  | 2.755588  | H | -2.529847 | -0.357710 | 4.004305  |
| H | -0.744528 | 7.555779  | 2.479964  | C | 2.696045  | 0.808290  | -3.385949 |
| H | -4.434249 | 5.380974  | 2.840320  | H | 1.745000  | 1.331541  | -3.249498 |
| H | -4.769118 | 3.328400  | 1.597941  | C | 2.373090  | -0.603646 | -3.883813 |
| H | -3.006004 | 7.292873  | 3.496921  | H | 1.653064  | -0.549791 | -4.706911 |
| C | -4.110701 | 1.193562  | 0.038974  | H | 1.934760  | -1.217876 | -3.092355 |
| C | -4.570500 | 0.844391  | -1.248081 | H | 3.266389  | -1.113776 | -4.262473 |
| C | -4.346498 | 0.329618  | 1.130761  | C | 3.521286  | 1.556853  | -4.440384 |
| C | -5.243318 | -0.364952 | -1.422359 | H | 4.494570  | 1.070361  | -4.580879 |
| C | -5.067625 | -0.845576 | 0.915641  | H | 3.701573  | 2.596510  | -4.150439 |
| C | -5.505329 | -1.221986 | -0.352745 | H | 3.000615  | 1.558038  | -5.404525 |
| H | -5.583295 | -0.648287 | -2.415939 | C | 3.577898  | 2.777423  | 1.254757  |
| H | -5.272796 | -1.504960 | 1.755684  | H | 2.584490  | 3.203942  | 1.080477  |
| C | 3.179541  | 1.791823  | -1.072278 | C | 3.555018  | 2.154698  | 2.653211  |
| C | 3.850620  | 1.750737  | 0.165869  | H | 4.557087  | 1.864988  | 2.989446  |
| C | 3.419141  | 0.807420  | -2.049001 | H | 2.915107  | 1.266178  | 2.672973  |
| C | 4.808352  | 0.758499  | 0.382874  | H | 3.158492  | 2.874660  | 3.376941  |
| C | 4.371567  | -0.179166 | -1.782841 | C | 4.598146  | 3.919146  | 1.181766  |
| C | 5.082764  | -0.211330 | -0.581342 | H | 4.565839  | 4.418196  | 0.207307  |
| H | 5.354041  | 0.731014  | 1.322702  | H | 5.613763  | 3.534659  | 1.332867  |
| H | 4.573519  | -0.945462 | -2.527826 | H | 4.397984  | 4.667539  | 1.956468  |
| O | -1.667267 | 1.723778  | -1.272842 | O | -0.020469 | -0.015900 | -1.969987 |
| O | 0.562007  | 1.697581  | -0.102347 | S | 0.645426  | -3.102783 | 2.211289  |
| P | -0.545339 | 0.668930  | -0.740181 | O | -0.157310 | -2.560390 | -2.161257 |
| O | -1.040751 | -0.136040 | 0.421650  | H | -1.300691 | -2.173316 | -0.410372 |
| C | -4.419366 | 1.756222  | -2.457035 | H | 1.143283  | -1.834913 | -0.365063 |
| H | -3.813136 | 2.620530  | -2.173615 | C | 1.721295  | -3.915709 | -0.684591 |
| C | -5.792733 | 2.285804  | -2.890236 | C | 1.334962  | -5.265176 | -0.660213 |
| H | -6.290495 | 2.812789  | -2.069036 | C | 3.072733  | -3.580060 | -0.845908 |
| H | -6.446098 | 1.465889  | -3.211792 | C | 2.293895  | -6.258499 | -0.799244 |
| H | -5.688220 | 2.981639  | -3.730054 | H | 0.293077  | -5.535417 | -0.515141 |
| C | -3.716459 | 1.055715  | -3.624237 | C | 4.028137  | -4.577602 | -0.994422 |
| H | -2.748432 | 0.649715  | -3.317057 | H | 3.363628  | -2.532286 | -0.859353 |
| H | -3.547330 | 1.766119  | -4.440849 | C | 3.637156  | -5.915107 | -0.969036 |

|   |            |           |           |
|---|------------|-----------|-----------|
| H | 1.998632   | -7.302332 | -0.773061 |
| H | 5.073557   | -4.312941 | -1.121828 |
| H | 4.382881   | -6.696734 | -1.078188 |
| C | 6.111924   | -1.264394 | -0.346993 |
| C | 5.949012   | -2.206237 | 0.693046  |
| C | 6.935848   | -3.236705 | 0.876514  |
| C | 8.040603   | -3.296271 | 0.026665  |
| H | 8.778831   | -4.083133 | 0.166663  |
| C | -6.210881  | -2.517347 | -0.566015 |
| C | -7.519755  | -2.531928 | -1.096994 |
| C | -5.563596  | -3.733200 | -0.247289 |
| C | -8.177284  | -3.787298 | -1.338330 |
| C | -6.244754  | -4.979903 | -0.470693 |
| C | -7.526868  | -4.978780 | -1.019112 |
| H | -8.031404  | -5.926350 | -1.196263 |
| C | 4.806057   | -2.216843 | 1.562969  |
| C | 4.668312   | -3.161536 | 2.538352  |
| H | 3.782035   | -3.160874 | 3.166022  |
| C | 5.658027   | -4.171455 | 2.723619  |
| H | 5.525986   | -4.914947 | 3.503554  |
| C | 6.753888   | -4.206692 | 1.914364  |
| H | 7.513025   | -4.975180 | 2.035846  |
| H | 4.028771   | -1.471127 | 1.425663  |
| C | 7.246690   | -1.325777 | -1.187343 |
| C | 8.219191   | -2.366547 | -0.998253 |
| C | 9.360012   | -2.427618 | -1.861583 |
| C | 9.544243   | -1.503897 | -2.846791 |
| H | 10.413465  | -1.556558 | -3.495134 |
| C | 8.598800   | -0.450377 | -3.020049 |
| C | 7.495446   | -0.362523 | -2.221833 |
| H | 10.078758  | -3.228072 | -1.706032 |
| H | 8.765829   | 0.294313  | -3.792288 |
| H | 6.796395   | 0.454631  | -2.360306 |
| C | -5.592766  | -6.208992 | -0.131383 |
| C | -4.336548  | -6.215873 | 0.396486  |
| H | -3.853531  | -7.152687 | 0.657126  |
| C | -3.645228  | -4.984778 | 0.599293  |
| H | -2.640421  | -4.997786 | 1.013454  |
| C | -4.229447  | -3.792248 | 0.281022  |
| C | -9.497264  | -3.794501 | -1.893066 |
| C | -10.145366 | -2.629694 | -2.176862 |
| C | -9.513001  | -1.379935 | -1.907214 |
| C | -8.252772  | -1.331882 | -1.385309 |
| H | -7.795874  | -0.371798 | -1.171668 |

|   |            |           |           |
|---|------------|-----------|-----------|
| H | -3.680280  | -2.869398 | 0.432657  |
| H | -6.130146  | -7.137846 | -0.304964 |
| H | -9.969902  | -4.756186 | -2.075962 |
| H | -11.146832 | -2.645323 | -2.596042 |
| H | -10.046916 | -0.457221 | -2.113702 |

**M-TS1-R E= -3767.85472783**

|   |           |           |           |
|---|-----------|-----------|-----------|
| H | -1.923137 | 1.286489  | -1.999175 |
| C | 0.907491  | -0.748665 | 2.988794  |
| C | -0.183154 | -0.082980 | 3.547713  |
| C | -0.650442 | -0.396637 | 4.829158  |
| C | 0.012474  | -1.382319 | 5.554868  |
| C | 1.113803  | -2.045455 | 5.016549  |
| C | 1.557551  | -1.728896 | 3.734391  |
| H | 1.231671  | -0.498869 | 1.982002  |
| H | -0.342214 | -1.629838 | 6.552212  |
| H | 1.624295  | -2.809178 | 5.594809  |
| H | 2.414924  | -2.243127 | 3.312107  |
| C | -1.868769 | 0.333194  | 5.326449  |
| H | -2.773859 | -0.177696 | 4.968634  |
| H | -1.904527 | 0.327367  | 6.419367  |
| C | -1.858927 | 1.769906  | 4.807653  |
| H | -2.772058 | 2.304730  | 5.069722  |
| H | -1.014137 | 2.319150  | 5.248676  |
| C | -1.662445 | 1.826521  | 3.310909  |
| N | -0.845261 | 0.917200  | 2.793092  |
| H | -0.571336 | 1.001799  | 1.797717  |
| C | -3.136536 | 1.625369  | -0.459737 |
| C | -2.350388 | 2.844618  | -0.300179 |
| H | -2.712190 | 0.711539  | -0.035273 |
| H | -1.275129 | 2.701785  | -0.229836 |
| C | -0.159205 | -2.366741 | -0.690161 |
| C | 1.101990  | -2.919650 | -0.784131 |
| C | 1.242583  | -4.174343 | -1.465616 |
| C | 0.070560  | -4.856213 | -1.899657 |
| C | -1.203913 | -4.257761 | -1.712192 |
| C | -1.338518 | -3.009807 | -1.157243 |
| H | 3.411171  | -4.231689 | -1.466191 |
| C | 2.506744  | -4.759622 | -1.749460 |
| C | 0.193434  | -6.115172 | -2.545519 |
| H | -2.087226 | -4.800183 | -2.039252 |
| C | 1.426346  | -6.666295 | -2.782285 |
| C | 2.594431  | -5.970776 | -2.389831 |
| H | -0.713437 | -6.625434 | -2.859913 |

|   |           |           |           |   |           |           |           |
|---|-----------|-----------|-----------|---|-----------|-----------|-----------|
| H | 1.511938  | -7.626782 | -3.280981 | H | 2.114486  | 0.913303  | -3.644249 |
| H | 3.570157  | -6.397393 | -2.601993 | H | 3.249147  | 0.132356  | -4.763686 |
| C | 2.259809  | -2.184205 | -0.203920 | H | 3.321012  | 1.882108  | -4.514846 |
| C | 3.147416  | -2.777643 | 0.754753  | C | 4.153962  | 5.548795  | -1.491652 |
| C | 2.456341  | -0.858798 | -0.540739 | H | 4.087017  | 6.130109  | -0.563267 |
| C | 2.941402  | -4.076399 | 1.297576  | C | 5.521627  | 5.823432  | -2.124951 |
| C | 4.250876  | -2.014644 | 1.232409  | H | 5.645431  | 6.893784  | -2.322897 |
| C | 3.533758  | -0.069041 | -0.052406 | H | 5.626424  | 5.294570  | -3.079150 |
| C | 3.802782  | -4.594264 | 2.233352  | H | 6.335857  | 5.499746  | -1.468673 |
| H | 2.078353  | -4.652815 | 0.982780  | C | 3.027039  | 6.008716  | -2.423175 |
| C | 5.134508  | -2.585062 | 2.187843  | H | 2.044749  | 5.845119  | -1.968014 |
| C | 4.427675  | -0.677171 | 0.794262  | H | 3.055768  | 5.454300  | -3.368324 |
| C | 4.920460  | -3.847738 | 2.677551  | H | 3.126881  | 7.075105  | -2.654428 |
| H | 3.621113  | -5.583230 | 2.643082  | C | 3.168625  | 2.065478  | 2.003043  |
| H | 5.976134  | -1.989842 | 2.532377  | H | 2.898774  | 1.008964  | 2.073651  |
| H | 5.277050  | -0.112417 | 1.171226  | C | 4.372249  | 2.305837  | 2.921808  |
| H | 5.597131  | -4.272099 | 3.412773  | H | 5.238279  | 1.705667  | 2.623890  |
| C | 3.665827  | 1.371670  | -0.430325 | H | 4.120191  | 2.051759  | 3.957574  |
| C | 3.954486  | 1.733308  | -1.763275 | H | 4.673330  | 3.359995  | 2.896999  |
| C | 3.516534  | 2.371696  | 0.552908  | C | 1.961623  | 2.876515  | 2.489863  |
| C | 4.109824  | 3.082218  | -2.081065 | H | 1.118997  | 2.769014  | 1.801125  |
| C | 3.691652  | 3.708630  | 0.184794  | H | 2.203295  | 3.941711  | 2.581583  |
| C | 3.988870  | 4.087232  | -1.120778 | H | 1.652334  | 2.524243  | 3.481811  |
| H | 4.337305  | 3.355949  | -3.109740 | C | -2.624474 | -1.820473 | -3.553901 |
| H | 3.583953  | 4.483167  | 0.941919  | H | -1.553039 | -2.003727 | -3.424886 |
| C | -2.657696 | -2.313623 | -1.034819 | C | -2.772287 | -0.546377 | -4.390008 |
| C | -3.283147 | -2.222770 | 0.224059  | H | -2.190992 | -0.647230 | -5.312886 |
| C | -3.251447 | -1.721375 | -2.169421 | H | -2.406494 | 0.331395  | -3.854444 |
| C | -4.511565 | -1.564617 | 0.326688  | H | -3.813537 | -0.367486 | -4.680876 |
| C | -4.470739 | -1.059204 | -2.011738 | C | -3.233595 | -2.999834 | -4.325724 |
| C | -5.119281 | -0.972174 | -0.779656 | H | -4.308490 | -2.839841 | -4.474124 |
| H | -4.992121 | -1.497488 | 1.298004  | H | -3.108694 | -3.949103 | -3.797422 |
| H | -4.932989 | -0.585176 | -2.875329 | H | -2.766210 | -3.095335 | -5.312147 |
| O | 1.585938  | -0.261188 | -1.429234 | C | -6.455886 | -0.254621 | -0.692327 |
| O | -0.314541 | -1.154852 | -0.049968 | H | -6.409197 | 0.591182  | -1.392681 |
| P | 0.136666  | 0.202633  | -0.847605 | C | -7.584319 | -1.183631 | -1.159759 |
| O | 0.243691  | 1.247279  | 0.219813  | H | -8.548827 | -0.664082 | -1.142741 |
| C | 4.140636  | 0.705519  | -2.870335 | H | -7.653708 | -2.055901 | -0.499354 |
| H | 3.959237  | -0.290877 | -2.457987 | H | -7.406278 | -1.545105 | -2.177592 |
| C | 5.582670  | 0.722439  | -3.392023 | C | -6.769791 | 0.299042  | 0.697858  |
| H | 6.298124  | 0.539631  | -2.583169 | H | -7.667950 | 0.923845  | 0.659209  |
| H | 5.827804  | 1.689135  | -3.846875 | H | -5.947673 | 0.906444  | 1.094154  |
| H | 5.722662  | -0.051671 | -4.154496 | H | -6.964828 | -0.507581 | 1.413489  |
| C | 3.144121  | 0.923692  | -4.013217 | C | -2.661845 | -2.867913 | 1.454753  |

|                                  |           |           |           |   |           |           |           |
|----------------------------------|-----------|-----------|-----------|---|-----------|-----------|-----------|
| H                                | -1.574345 | -2.863616 | 1.328313  | N | 0.700697  | -1.324964 | 2.605103  |
| C                                | -2.960397 | -2.111907 | 2.751778  | H | 0.370939  | -1.298513 | 1.622288  |
| H                                | -4.004083 | -2.232102 | 3.064520  | C | 0.859711  | -3.696823 | -1.178288 |
| H                                | -2.757816 | -1.040438 | 2.639372  | C | 2.094801  | -3.092756 | -0.684245 |
| H                                | -2.326675 | -2.496024 | 3.558752  | H | 0.836581  | -4.776664 | -1.301574 |
| C                                | -3.115103 | -4.328696 | 1.570572  | C | 0.244069  | 2.198273  | -0.801430 |
| H                                | -2.841563 | -4.902686 | 0.679097  | C | -0.957311 | 2.875540  | -0.844384 |
| H                                | -4.204104 | -4.381920 | 1.687333  | C | -1.002823 | 4.135373  | -1.526791 |
| H                                | -2.653936 | -4.808309 | 2.441110  | C | 0.208281  | 4.693984  | -2.024266 |
| O                                | -0.715021 | 0.429600  | -2.066795 | C | 1.431304  | 3.994523  | -1.842453 |
| S                                | -2.397823 | 3.035079  | 2.394878  | C | 1.469693  | 2.753326  | -1.257814 |
| O                                | -2.770175 | 1.853978  | -1.826248 | H | -3.149856 | 4.414121  | -1.400039 |
| C                                | -2.858458 | 4.198704  | -0.484231 | C | -2.215369 | 4.843051  | -1.747596 |
| C                                | -4.229065 | 4.490706  | -0.516500 | C | 0.175961  | 5.947261  | -2.690610 |
| C                                | -1.922016 | 5.233180  | -0.615735 | H | 2.355826  | 4.461736  | -2.173555 |
| C                                | -4.650760 | 5.802768  | -0.688088 | C | -1.008046 | 6.614030  | -2.876698 |
| H                                | -4.963940 | 3.698792  | -0.406997 | C | -2.216490 | 6.048413  | -2.405182 |
| C                                | -2.348239 | 6.544004  | -0.786574 | H | 1.111239  | 6.361469  | -3.058353 |
| H                                | -0.861851 | 4.995913  | -0.579178 | H | -1.024339 | 7.568916  | -3.392946 |
| C                                | -3.712864 | 6.827526  | -0.823810 | H | -3.154438 | 6.569543  | -2.571358 |
| H                                | -5.711560 | 6.030149  | -0.713693 | C | -2.143402 | 2.279114  | -0.171163 |
| H                                | -1.620219 | 7.341882  | -0.890605 | C | -2.849054 | 2.960060  | 0.875200  |
| H                                | -4.049292 | 7.851432  | -0.956181 | C | -2.520041 | 0.989870  | -0.482046 |
| H                                | -4.213917 | 1.679756  | -0.319125 | C | -2.438291 | 4.223043  | 1.383351  |
|                                  |           |           |           | C | -3.969080 | 2.318709  | 1.477334  |
|                                  |           |           |           | C | -3.628776 | 0.323839  | 0.110866  |
|                                  |           |           |           | C | -3.122960 | 4.825076  | 2.410034  |
|                                  |           |           |           | H | -1.559198 | 4.703380  | 0.967566  |
|                                  |           |           |           | C | -4.665359 | 2.974649  | 2.528115  |
|                                  |           |           |           | C | -4.347445 | 1.017184  | 1.054351  |
|                                  |           |           |           | C | -4.255975 | 4.201640  | 2.985094  |
|                                  |           |           |           | H | -2.786203 | 5.784615  | 2.790406  |
|                                  |           |           |           | H | -5.521304 | 2.473966  | 2.973388  |
|                                  |           |           |           | H | -5.213267 | 0.550561  | 1.517505  |
|                                  |           |           |           | H | -4.789005 | 4.691218  | 3.794225  |
|                                  |           |           |           | C | -3.971346 | -1.078174 | -0.280087 |
|                                  |           |           |           | C | -4.416709 | -1.355929 | -1.589920 |
|                                  |           |           |           | C | -3.852563 | -2.123579 | 0.659082  |
|                                  |           |           |           | C | -4.756579 | -2.666002 | -1.926689 |
|                                  |           |           |           | C | -4.214076 | -3.417773 | 0.273691  |
|                                  |           |           |           | C | -4.666940 | -3.712521 | -1.008625 |
|                                  |           |           |           | H | -5.105452 | -2.874830 | -2.936522 |
|                                  |           |           |           | H | -4.130696 | -4.226749 | 0.996929  |
|                                  |           |           |           | C | 2.759491  | 2.036357  | -1.013495 |
| <b>M-TS1-S E= -3767.85161187</b> |           |           |           |   |           |           |           |
| H                                | 0.889129  | -2.120209 | -2.404908 |   |           |           |           |
| C                                | -0.706337 | 0.617770  | 2.971289  |   |           |           |           |
| C                                | 0.247262  | -0.282321 | 3.449097  |   |           |           |           |
| C                                | 0.799399  | -0.147972 | 4.727877  |   |           |           |           |
| C                                | 0.359573  | 0.896642  | 5.535356  |   |           |           |           |
| C                                | -0.601411 | 1.797341  | 5.077523  |   |           |           |           |
| C                                | -1.128253 | 1.658997  | 3.794239  |   |           |           |           |
| H                                | -1.101722 | 0.502833  | 1.965524  |   |           |           |           |
| H                                | 0.782554  | 1.006433  | 6.530768  |   |           |           |           |
| H                                | -0.934790 | 2.607312  | 5.718704  |   |           |           |           |
| H                                | -1.872286 | 2.360856  | 3.428869  |   |           |           |           |
| C                                | 1.882812  | -1.114843 | 5.124050  |   |           |           |           |
| H                                | 2.851756  | -0.740918 | 4.764185  |   |           |           |           |
| H                                | 1.951577  | -1.196641 | 6.212388  |   |           |           |           |
| C                                | 1.610394  | -2.486880 | 4.509081  |   |           |           |           |
| H                                | 2.424562  | -3.186689 | 4.698194  |   |           |           |           |
| H                                | 0.695341  | -2.914858 | 4.944430  |   |           |           |           |
| C                                | 1.366212  | -2.394784 | 3.020977  |   |           |           |           |

|   |           |           |           |   |           |           |           |
|---|-----------|-----------|-----------|---|-----------|-----------|-----------|
| C | 3.327419  | 2.078605  | 0.275408  | H | 2.317613  | -0.324250 | -4.889095 |
| C | 3.407690  | 1.347357  | -2.053770 | H | 2.716127  | -0.970222 | -3.288256 |
| C | 4.578060  | 1.494394  | 0.482079  | H | 3.999651  | -0.357673 | -4.351053 |
| C | 4.657226  | 0.774947  | -1.799203 | C | 3.328532  | 2.261095  | -4.398522 |
| C | 5.265736  | 0.849313  | -0.546866 | H | 4.413175  | 2.145869  | -4.513879 |
| H | 5.022958  | 1.541531  | 1.472443  | H | 3.133865  | 3.278097  | -4.044034 |
| H | 5.172700  | 0.242747  | -2.596738 | H | 2.869069  | 2.151498  | -5.387208 |
| O | -1.793892 | 0.307660  | -1.437351 | C | 6.649953  | 0.261240  | -0.341298 |
| O | 0.306104  | 0.962775  | -0.195396 | H | 6.793147  | -0.497054 | -1.123048 |
| P | -0.378690 | -0.330268 | -0.935055 | C | 7.718114  | 1.344885  | -0.539968 |
| O | -0.571777 | -1.330795 | 0.161151  | H | 8.724263  | 0.924144  | -0.434720 |
| C | -4.580600 | -0.275146 | -2.649518 | H | 7.599422  | 2.136360  | 0.209260  |
| H | -4.213738 | 0.672886  | -2.247069 | H | 7.637142  | 1.803320  | -1.530731 |
| C | -6.061876 | -0.079596 | -2.994835 | C | 6.826598  | -0.415875 | 1.019846  |
| H | -6.643414 | 0.181902  | -2.104360 | H | 7.789487  | -0.936876 | 1.061168  |
| H | -6.490332 | -0.994091 | -3.420932 | H | 6.034172  | -1.145416 | 1.219202  |
| H | -6.182321 | 0.722986  | -3.730840 | H | 6.820914  | 0.318916  | 1.832659  |
| C | -3.762227 | -0.587248 | -3.906551 | C | 2.618840  | 2.768930  | 1.432591  |
| H | -2.706043 | -0.732797 | -3.660943 | H | 1.544783  | 2.775073  | 1.221101  |
| H | -3.837963 | 0.239349  | -4.621659 | C | 2.800181  | 2.032281  | 2.762807  |
| H | -4.128383 | -1.491600 | -4.405653 | H | 3.812290  | 2.156481  | 3.164726  |
| C | -5.024487 | -5.132615 | -1.404356 | H | 2.607076  | 0.960567  | 2.645233  |
| H | -4.936846 | -5.754531 | -0.504438 | H | 2.097716  | 2.425265  | 3.506241  |
| C | -6.465301 | -5.236584 | -1.914214 | C | 3.079222  | 4.226570  | 1.551645  |
| H | -6.718757 | -6.278373 | -2.138816 | H | 2.881137  | 4.782325  | 0.628858  |
| H | -6.598800 | -4.656043 | -2.834194 | H | 4.156595  | 4.272950  | 1.750593  |
| H | -7.177734 | -4.861709 | -1.172514 | H | 2.558476  | 4.730517  | 2.373453  |
| C | -4.041977 | -5.670808 | -2.450710 | O | 0.363680  | -0.704452 | -2.187356 |
| H | -3.010175 | -5.617482 | -2.088200 | S | 1.871271  | -3.627027 | 1.986631  |
| H | -4.103194 | -5.086932 | -3.376408 | O | 1.298576  | -3.059743 | -2.392319 |
| H | -4.268742 | -6.714523 | -2.694904 | H | -0.062670 | -3.286526 | -0.772236 |
| C | -3.344749 | -1.910029 | 2.077881  | H | 2.034582  | -2.039397 | -0.423793 |
| H | -2.909456 | -0.909008 | 2.137632  | C | 3.414927  | -3.697156 | -0.793184 |
| C | -4.494546 | -1.991572 | 3.089624  | C | 3.580022  | -5.074983 | -0.996538 |
| H | -5.280204 | -1.259572 | 2.876555  | C | 4.541974  | -2.870360 | -0.676646 |
| H | -4.124927 | -1.809840 | 4.105226  | C | 4.856454  | -5.612845 | -1.092915 |
| H | -4.953475 | -2.987508 | 3.069720  | H | 2.716320  | -5.728228 | -1.068344 |
| C | -2.243815 | -2.906572 | 2.459138  | C | 5.816714  | -3.414184 | -0.773715 |
| H | -1.448236 | -2.914117 | 1.709027  | H | 4.406337  | -1.803270 | -0.511787 |
| H | -2.638145 | -3.923808 | 2.563623  | C | 5.973166  | -4.783830 | -0.984717 |
| H | -1.809934 | -2.624899 | 3.426698  | H | 4.983172  | -6.679190 | -1.249090 |
| C | 2.777628  | 1.206876  | -3.430525 | H | 6.689133  | -2.774342 | -0.682835 |
| H | 1.700779  | 1.367916  | -3.317262 | H | 6.969584  | -5.208404 | -1.061149 |
| C | 2.968209  | -0.195175 | -4.017652 |   |           |           |           |



**M-TS5-R E= -3060.35421690**

|   |           |           |           |
|---|-----------|-----------|-----------|
| H | -2.515986 | -0.197905 | -2.529866 |
| C | 0.865763  | 0.514301  | 2.636492  |
| C | -0.119971 | -0.433490 | 2.911920  |
| C | 0.095252  | -1.462364 | 3.835313  |
| C | 1.321463  | -1.522554 | 4.491717  |
| C | 2.313114  | -0.579231 | 4.234530  |
| C | 2.082330  | 0.437078  | 3.308544  |
| H | 0.671727  | 1.296154  | 1.905812  |
| H | 1.493351  | -2.317309 | 5.213069  |
| H | 3.265016  | -0.634526 | 4.753631  |
| H | 2.853071  | 1.176066  | 3.112810  |
| C | -1.016386 | -2.454201 | 4.049770  |
| H | -0.949177 | -3.253792 | 3.298983  |
| H | -0.923896 | -2.928641 | 5.030677  |
| C | -2.367097 | -1.749777 | 3.934054  |
| H | -3.200039 | -2.451517 | 3.989402  |
| H | -2.483779 | -1.032986 | 4.759568  |
| C | -2.479461 | -0.949465 | 2.656583  |
| N | -1.366210 | -0.359796 | 2.239059  |
| H | -1.399223 | 0.249137  | 1.404862  |
| C | -3.576563 | -1.262364 | -1.268750 |
| C | -3.959454 | 0.031293  | -0.712107 |
| H | -2.607064 | -1.648776 | -0.950346 |
| H | -3.139564 | 0.703470  | -0.466930 |
| C | 1.391586  | -1.317734 | -0.877809 |
| C | 2.618942  | -0.714113 | -1.053889 |
| C | 3.626674  | -1.418138 | -1.790726 |
| C | 3.352273  | -2.741102 | -2.240799 |
| C | 2.090442  | -3.330219 | -1.969278 |
| C | 1.104099  | -2.644262 | -1.302541 |
| H | 5.089136  | 0.183533  | -1.821126 |
| C | 4.880711  | -0.837562 | -2.123076 |
| C | 4.348289  | -3.453177 | -2.961122 |
| H | 1.908579  | -4.351934 | -2.294512 |
| C | 5.557280  | -2.873607 | -3.248257 |
| C | 5.818335  | -1.546518 | -2.832144 |
| H | 4.125975  | -4.466580 | -3.285468 |
| H | 6.311796  | -3.423651 | -3.802044 |
| H | 6.768128  | -1.082677 | -3.080668 |
| C | 2.832768  | 0.649962  | -0.494758 |
| C | 3.870135  | 0.923699  | 0.455964  |
| C | 1.957725  | 1.664110  | -0.827607 |
| C | 4.715246  | -0.090462 | 0.983661  |

|   |           |           |           |
|---|-----------|-----------|-----------|
| C | 4.016491  | 2.250167  | 0.951817  |
| C | 2.080743  | 2.994435  | -0.334446 |
| C | 5.668705  | 0.207056  | 1.925545  |
| H | 4.585676  | -1.115229 | 0.652855  |
| C | 5.028846  | 2.531824  | 1.909042  |
| C | 3.117373  | 3.260678  | 0.529595  |
| C | 5.839035  | 1.534149  | 2.387491  |
| H | 6.295761  | -0.584448 | 2.324618  |
| H | 5.133351  | 3.552881  | 2.266842  |
| H | 3.250706  | 4.269910  | 0.911680  |
| H | 6.603323  | 1.754309  | 3.126462  |
| C | 1.114846  | 4.056083  | -0.717190 |
| C | 0.753034  | 4.268620  | -2.053410 |
| C | 0.575939  | 4.889211  | 0.269428  |
| C | -0.119177 | 5.298185  | -2.391481 |
| C | -0.299087 | 5.917459  | -0.070011 |
| C | -0.647955 | 6.125714  | -1.402025 |
| H | -0.384993 | 5.455701  | -3.432554 |
| H | -0.713312 | 6.551467  | 0.708296  |
| C | -0.214848 | -3.262619 | -1.010834 |
| C | -0.927488 | -3.916874 | -2.020959 |
| C | -0.749607 | -3.233594 | 0.285508  |
| C | -2.141508 | -4.542329 | -1.741794 |
| C | -1.962216 | -3.858463 | 0.562548  |
| C | -2.660493 | -4.518422 | -0.449440 |
| H | -2.681830 | -5.045523 | -2.538083 |
| H | -2.367771 | -3.828028 | 1.570562  |
| O | 0.916366  | 1.386157  | -1.687280 |
| O | 0.389800  | -0.614068 | -0.248001 |
| P | -0.368726 | 0.563374  | -1.102941 |
| O | -1.142838 | 1.324632  | -0.070930 |
| O | -1.039358 | -0.002930 | -2.322417 |
| S | -3.966364 | -0.775542 | 1.881973  |
| O | -3.504993 | -0.469109 | -2.463431 |
| C | -5.310123 | 0.574968  | -0.705374 |
| C | -6.440366 | -0.215922 | -0.955283 |
| C | -5.463058 | 1.939157  | -0.420212 |
| C | -7.704526 | 0.357905  | -0.926633 |
| H | -6.334261 | -1.274678 | -1.170607 |
| C | -6.729253 | 2.508373  | -0.390813 |
| H | -4.580796 | 2.540199  | -0.216645 |
| C | -7.848928 | 1.717238  | -0.645364 |
| H | -8.579961 | -0.252715 | -1.122709 |
| H | -6.845091 | 3.564451  | -0.170077 |

|   |           |           |           |
|---|-----------|-----------|-----------|
| H | -8.840171 | 2.160074  | -0.622007 |
| H | -4.333066 | -2.040031 | -1.346336 |
| H | -1.330574 | 6.927050  | -1.668745 |
| H | 1.164264  | 3.629566  | -2.828016 |
| H | 0.832452  | 4.715325  | 1.311115  |
| H | -0.199753 | -2.729120 | 1.076110  |
| H | -3.606399 | -5.005256 | -0.230981 |
| H | -0.530488 | -3.923379 | -3.032352 |

**M-TS5-S E= -3060.35267755**

|   |           |           |           |
|---|-----------|-----------|-----------|
| H | -1.833657 | 2.505673  | 1.557622  |
| C | -0.025508 | -2.311879 | -1.874788 |
| C | -1.389485 | -2.592674 | -1.955639 |
| C | -1.873996 | -3.656474 | -2.725403 |
| C | -0.955579 | -4.457694 | -3.397195 |
| C | 0.411895  | -4.196000 | -3.320808 |
| C | 0.872898  | -3.118597 | -2.567063 |
| H | 0.315108  | -1.467704 | -1.279357 |
| H | -1.319999 | -5.290976 | -3.992853 |
| H | 1.115578  | -4.830017 | -3.851379 |
| H | 1.936667  | -2.905595 | -2.507080 |
| C | -3.366755 | -3.836661 | -2.815723 |
| H | -3.759512 | -3.219937 | -3.635308 |
| H | -3.617059 | -4.876064 | -3.045727 |
| C | -4.031528 | -3.415750 | -1.505281 |
| H | -5.119081 | -3.434413 | -1.578266 |
| H | -3.740031 | -4.109228 | -0.701952 |
| C | -3.582654 | -2.044313 | -1.059259 |
| N | -2.305572 | -1.756044 | -1.273126 |
| H | -1.911605 | -0.893308 | -0.870183 |
| C | -3.248878 | 1.078943  | 1.825561  |
| C | -3.711874 | 1.453849  | 0.493572  |
| H | -3.989463 | 0.905060  | 2.603414  |
| C | 2.620092  | 1.545393  | -0.153726 |
| C | 3.275231  | 0.467280  | 0.413572  |
| C | 4.643291  | 0.627531  | 0.818890  |
| C | 5.323080  | 1.833966  | 0.495418  |
| C | 4.626475  | 2.863172  | -0.184192 |
| C | 3.291163  | 2.758481  | -0.493713 |
| H | 4.835318  | -1.270638 | 1.855047  |
| C | 5.347263  | -0.361224 | 1.559996  |
| C | 6.681190  | 1.999586  | 0.877104  |
| H | 5.159891  | 3.777731  | -0.431384 |
| C | 7.339389  | 1.018354  | 1.572046  |

|   |           |           |           |
|---|-----------|-----------|-----------|
| C | 6.656690  | -0.169886 | 1.925025  |
| H | 7.182876  | 2.927300  | 0.614210  |
| H | 8.376126  | 1.153652  | 1.864323  |
| H | 7.171684  | -0.935715 | 2.497005  |
| C | 2.564438  | -0.825849 | 0.621626  |
| C | 3.054695  | -2.069829 | 0.097375  |
| C | 1.374573  | -0.835187 | 1.316123  |
| C | 4.182398  | -2.151884 | -0.764471 |
| C | 2.357007  | -3.270454 | 0.411753  |
| C | 0.648002  | -2.020477 | 1.621233  |
| C | 4.607045  | -3.362730 | -1.255516 |
| H | 4.702604  | -1.242961 | -1.046786 |
| C | 2.831158  | -4.508951 | -0.096898 |
| C | 1.168209  | -3.214243 | 1.182854  |
| C | 3.933992  | -4.558834 | -0.910269 |
| H | 5.466338  | -3.401264 | -1.918115 |
| H | 2.286902  | -5.414197 | 0.159351  |
| H | 0.651020  | -4.142958 | 1.411970  |
| H | 4.285904  | -5.508642 | -1.300770 |
| C | -0.635520 | -1.961746 | 2.365826  |
| C | -0.762958 | -1.208489 | 3.540782  |
| C | -1.737780 | -2.694089 | 1.909960  |
| C | -1.961922 | -1.200610 | 4.247323  |
| C | -2.940184 | -2.679434 | 2.614533  |
| C | -3.054382 | -1.934897 | 3.786535  |
| H | -2.040579 | -0.620870 | 5.162375  |
| H | -3.788224 | -3.249991 | 2.247689  |
| C | 2.604551  | 3.874237  | -1.197963 |
| C | 3.201508  | 4.449697  | -2.326132 |
| C | 1.396870  | 4.403098  | -0.727320 |
| C | 2.605648  | 5.530488  | -2.971372 |
| C | 0.805182  | 5.484843  | -1.372704 |
| C | 1.404592  | 6.051784  | -2.495885 |
| H | 3.078758  | 5.961570  | -3.848742 |
| H | -0.128459 | 5.887854  | -0.991322 |
| O | 0.845213  | 0.373387  | 1.719520  |
| O | 1.298179  | 1.429040  | -0.528188 |
| P | 0.081278  | 1.209530  | 0.540993  |
| O | -0.942606 | 0.374239  | -0.155323 |
| O | -0.350639 | 2.499250  | 1.184760  |
| S | -4.645025 | -0.987208 | -0.291811 |
| O | -2.829389 | 2.454283  | 1.806676  |
| H | -2.429903 | 0.359445  | 1.848204  |
| H | -2.956762 | 1.392942  | -0.284368 |

|   |           |          |           |   |           |           |           |
|---|-----------|----------|-----------|---|-----------|-----------|-----------|
| C | -4.970125 | 2.125961 | 0.197421  | H | -6.426590 | 3.798532  | -2.383275 |
| C | -6.012368 | 2.203548 | 1.131240  | H | -8.262781 | 3.942113  | -0.721259 |
| C | -5.126929 | 2.701487 | -1.071020 | H | -3.989878 | -1.925866 | 4.338000  |
| C | -7.191583 | 2.856914 | 0.797740  | H | 0.084951  | -0.637135 | 3.904674  |
| H | -5.901980 | 1.756145 | 2.113978  | H | -1.648445 | -3.269529 | 0.991246  |
| C | -6.308092 | 3.353035 | -1.400962 | H | 0.925617  | 3.976597  | 0.152447  |
| H | -4.316835 | 2.627481 | -1.791513 | H | 0.937863  | 6.894009  | -2.997975 |
| C | -7.339104 | 3.431784 | -0.465512 | H | 4.131946  | 4.036849  | -2.706829 |
| H | -7.998082 | 2.919689 | 1.521132  |   |           |           |           |

## 12. Complete Reference for Gaussian 09

Gaussian 09, Revision D.01, Frisch, M. J.; Trucks, G. W.; Schlegel, H. B.; Scuseria, G. E.; Robb, M. A.; Cheeseman, J. R.; Scalmani, G.; Barone, V.; Mennucci, B.; Petersson, G. A.; Nakatsuji, H.; Caricato, M.; Li, X.; Hratchian, H. P.; Izmaylov, A. F.; Bloino, J.; Zheng, G.; Sonnenberg, J. L.; Hada, M.; Ehara, M.; Toyota, K.; Fukuda, R.; Hasegawa, J.; Ishida, M.; Nakajima, T.; Honda, Y.; Kitao, O.; Nakai, H.; Vreven, T.; Montgomery, Jr., J. A.; Peralta, J. E.; Ogliaro, F.; Bearpark, M.; Heyd, J. J.; Brothers, E.; Kudin, K. N.; Staroverov, V. N.; Kobayashi, R.; Normand, J.; Raghavachari, K.; Rendell, A.; Burant, J. C.; Iyengar, S. S.; Tomasi, J.; Cossi, M.; Rega, N.; Millam, N. J.; Klene, M.; Knox, J. E.; Cross, J. B.; Bakken, V.; Adamo, C.; Jaramillo, J.; Gomperts, R.; Stratmann, R. E.; Yazyev, O.; Austin, A. J.; Cammi, R.; Pomelli, C.; Ochterski, J. W.; Martin, R. L.; Morokuma, K.; Zakrzewski, V. G.; Voth, G. A.; Salvador, P.; Dannenberg, J. J.; Dapprich, S.; Daniels, A. D.; Farkas, Ö.; Foresman, J. B.; Ortiz, J. V.; Cioslowski, J.; Fox, D. J. Gaussian, Inc., Wallingford CT, **2013**.

# 13.Copies of NMR Spectra

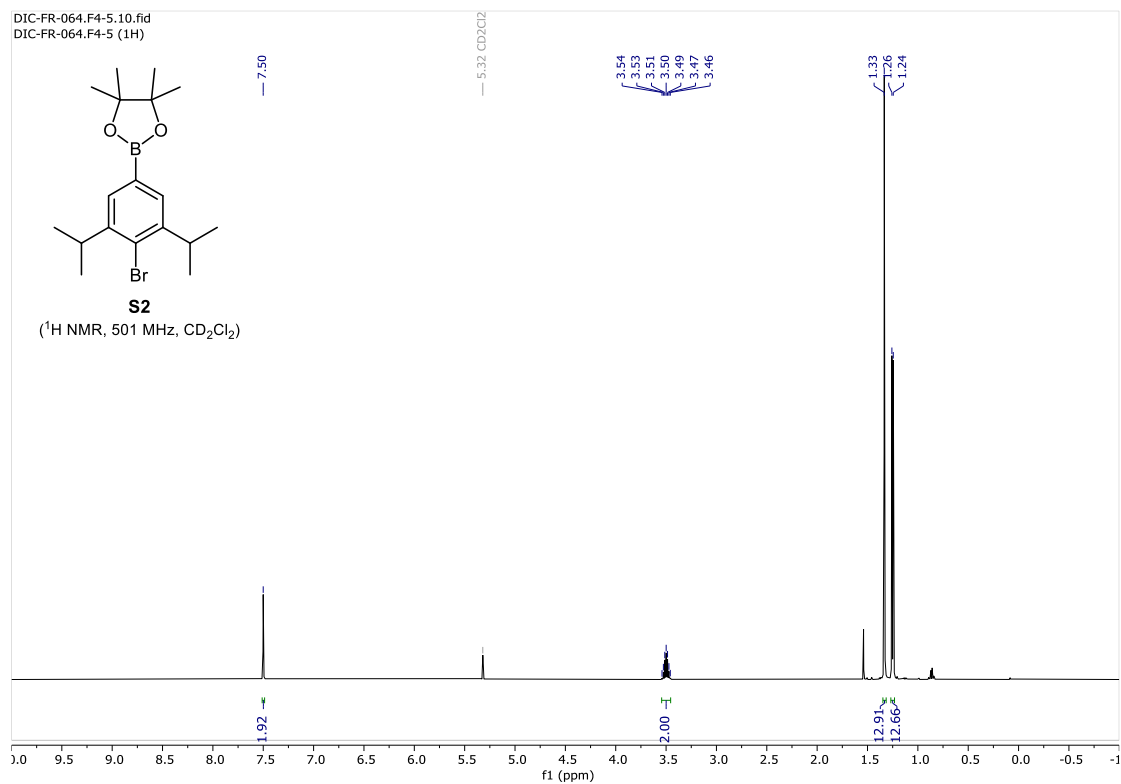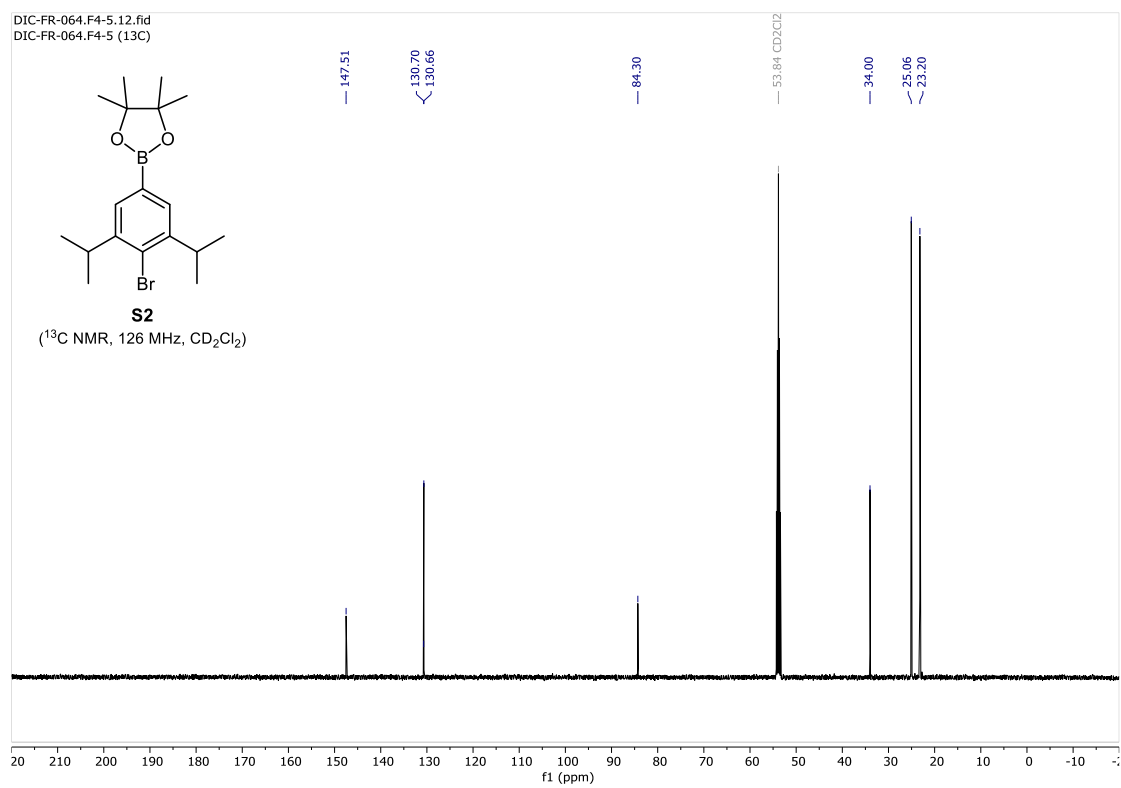

DIC-FR-064.F4-5.11.fid  
DIC-FR-064.F4-5 (11B)

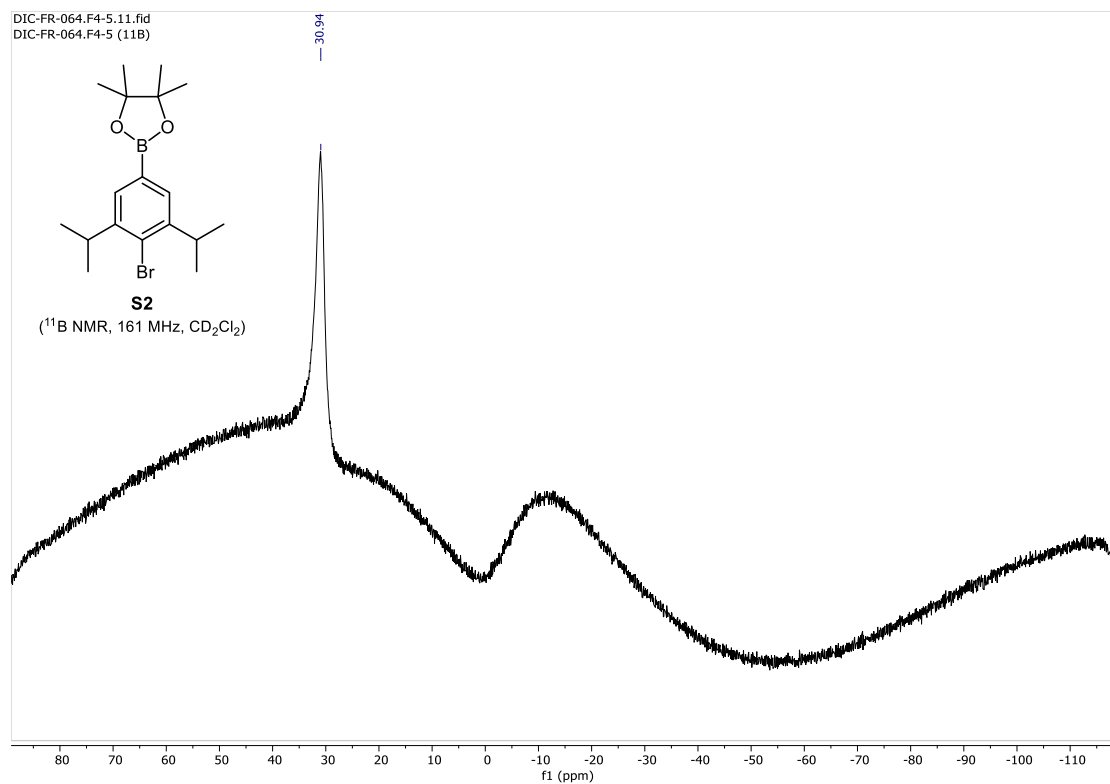

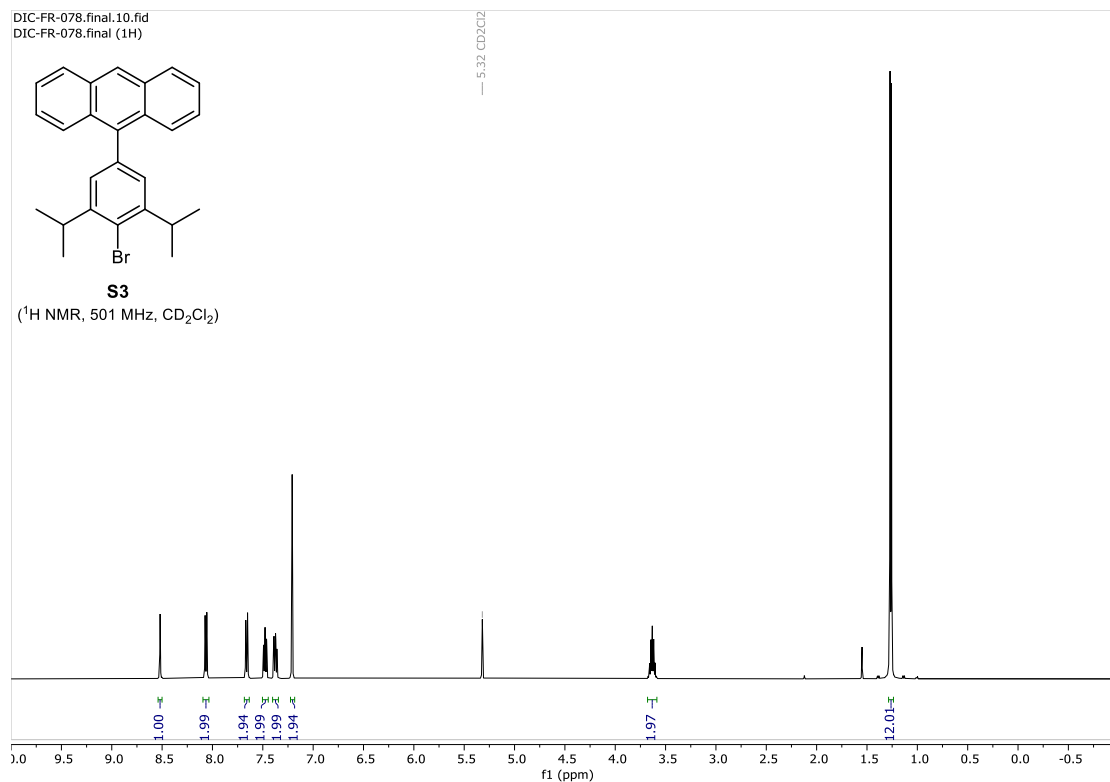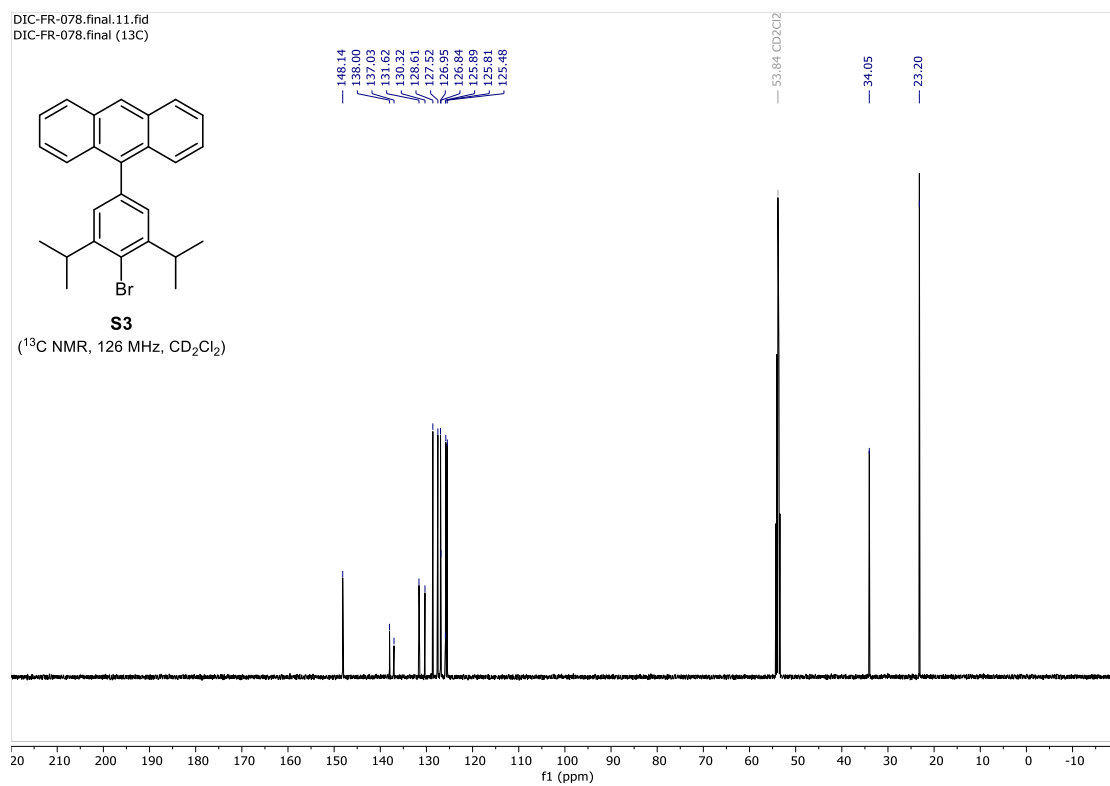

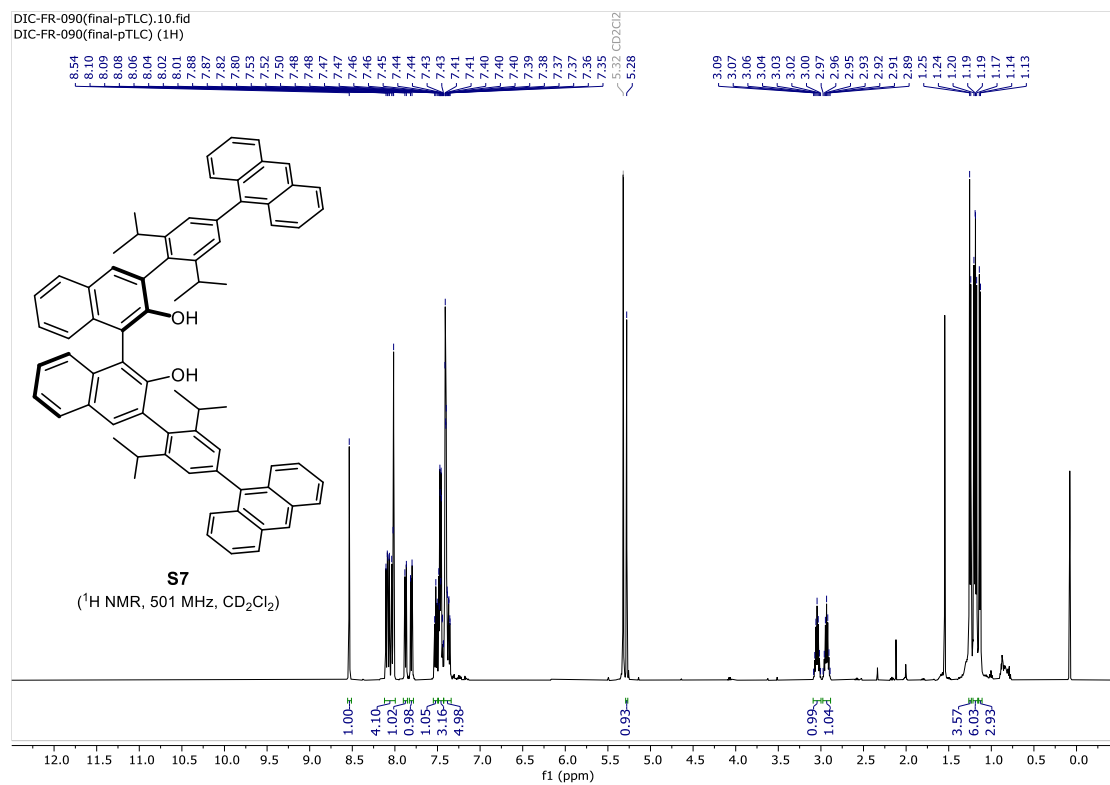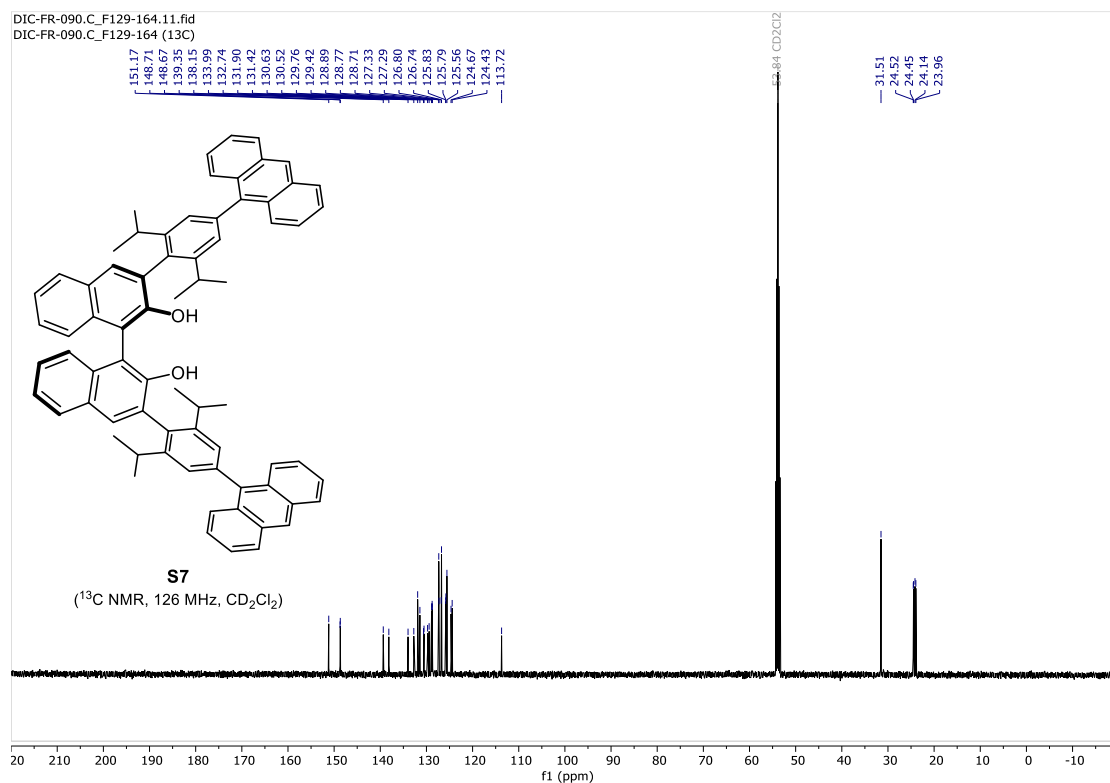



## 14.GC Traces

Thiirane (*R*)-2, obtained with catalyst (*R*)-C5

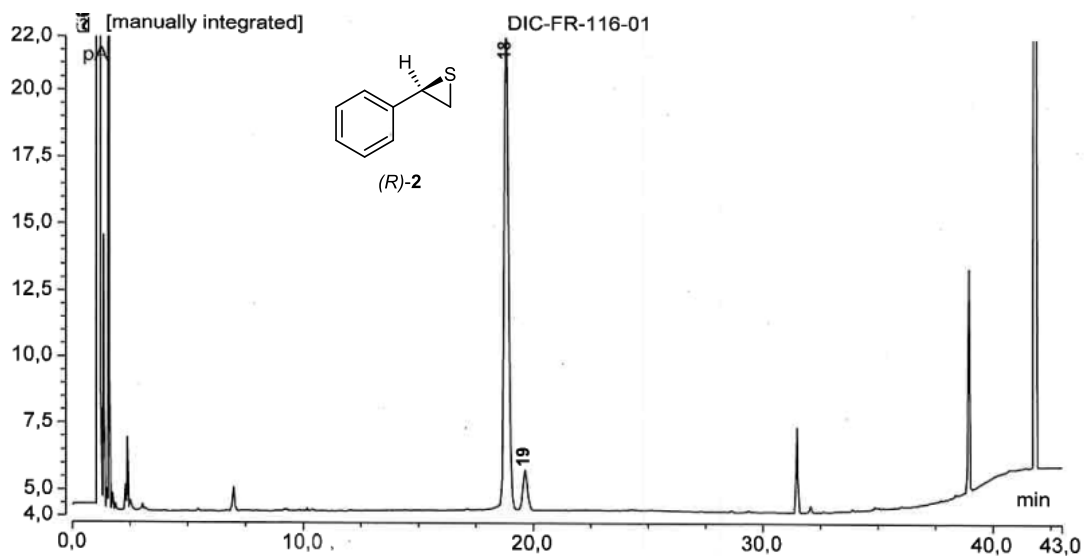

Sample: **DIC-FR-116-01**  
 Sequenz: **8306 DIC-FR Kes**  
 Sequenz date: **09.07.21**

Instrument: **GC\_521**  
 Measured: **09.07.21 11:48**  
 Processing M.: **ee DIC-FR**  
 Report-File: **ee 114-01**

chirale Messung, Verhältnis der Enantiomere

Zuordnung nach achiraler GCMS des Racemates 27223 DIC-FR-081-02 20/7633

ee unter Vorbehalt, Racemat nicht stabil (siehe Messungen auf BGB-176/BGB-15 G/618)

| No. | Ret.Time<br>min | Rel.Area<br>% | Peak Name |
|-----|-----------------|---------------|-----------|
| 18  | 18,80           | 92,22 .       |           |
| 19  | 19,63           | 7,78 .        |           |

Instrument parameters:

Column: 25,0 m Hydrodex-beta-TBDac-CD, 0.25/?df;G/625  
 Temperature: 220/ 100, 25 min iso, 8/min 220, 3 min iso/350  
 Gas: 0,60 bar Hydrogen  
 Sample size: 1,0 µL

M. Masch

Epoxide (R)-1, obtained with catalyst (R)-C5

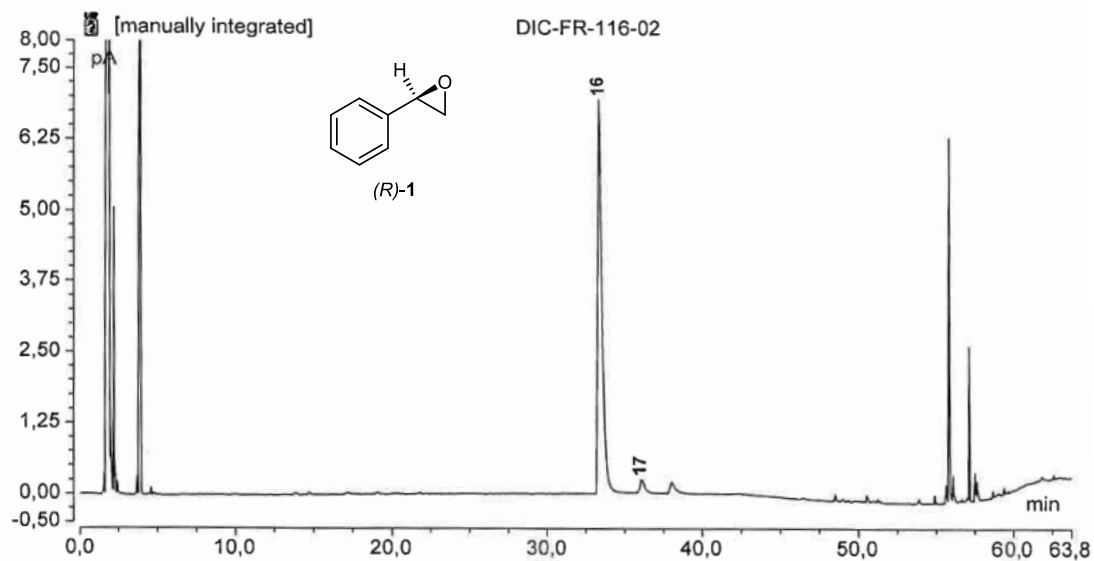

Sample: **DIC-FR-116-02** Instrument: **GC\_313**  
 Sequenz: **8306 DIC-FR Kes** Measured: **09.07.21 11:42**  
 Sequenz date: **09.07.21** Processing M.: ee DIC-FR  
 Report-File: ee 114-02

chirale Messung, Verhältnis der Enantiomere  
 Zuordnung siehe achirale GCMS des Racemates 27222 DIC-FR-081-01 20/7633

| No. | Ret.Time<br>min | Rel.Area<br>% | Peak Name |
|-----|-----------------|---------------|-----------|
| 16  | 33,32           | 95,89 .       |           |
| 17  | 36,08           | 4,11 .        |           |

Instrument parameters:  
 Column: 30,0 m BGB-176/BGB-15 0.25/0.25df;G/618  
 Temperature: 220/ 70, 42 min iso 8/min 220, 3 min iso/ 350  
 Gas: 0,60 bar H2  
 Sample size: 1,0 µL

M. Masandh

Thiirane (*R*)-2, obtained with catalyst (*R*)-C6

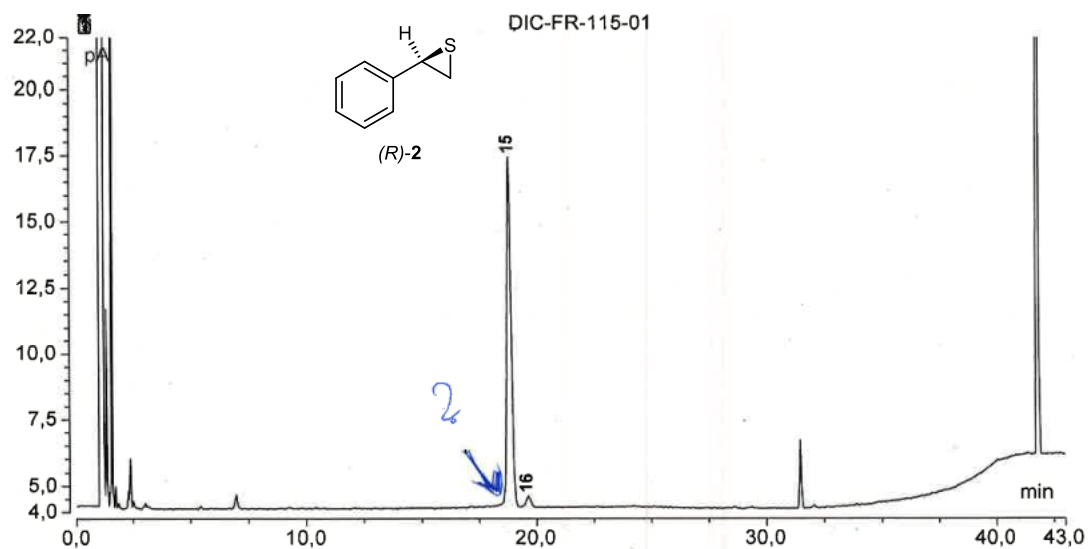

Sample: **DIC-FR-115-01**  
 Sequenz: **8305 DIC-FR Ru**  
 Sequenz date: **09.07.21**

Instrument: **GC\_521**  
 Measured: **09.07.21 08:49**  
 Processing M.: **ee DIC-FR**  
 Report-File: **ee- Verhältnis 115-01**

chirale Messung, Verhältnis der Enantiomere  
 Zuordnung nach achiraler GCMS des Racemates 27223 DIC-FR-081-02 20/7633  
 ee unter Vorbehalt, Racemat nicht stabil (siehe Messungen auf BGB-176/BGB-15 G/618)  
 siehe Ausschnitt Plot

| No. | Ret.Time<br>min | Rel.Area<br>% | Peak Name |
|-----|-----------------|---------------|-----------|
| 15  | 18,80           | 96,77 .       |           |
| 16  | 19,62           | 3,23 .        |           |

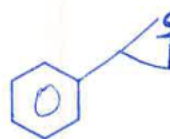

Instrument parameters:  
 Column: 25,0 m Hydrodex-beta-TBDAC-CD, 0.25/7df,G/625  
 Temperature: 220/ 100, 25 min iso, 8/min 220, 3 min iso/350  
 Gas: 0,60 bar Hydrogen  
 Sample size: 1,0 µL

9.07.2021  
 J. Rutke

Epoxide (R)-1, with catalyst (R)-C6

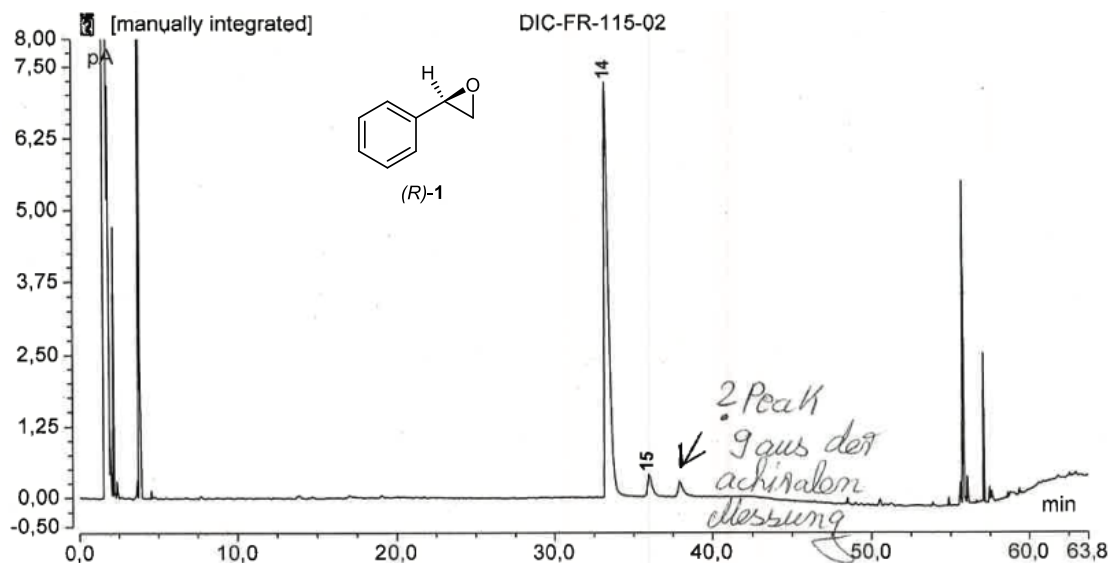

Sample: **DIC-FR-115-02**  
 Sequenz: **8305 DIC-FR Ru**  
 Sequenz date: **09.07.21**

Instrument: **GC\_313**  
 Measured: **09.07.21 09:14**  
 Processing M.: 115-02  
 Report-File: ee-Verhältnis 115-02

chirale Messung, Verhältnis der Enantiomere  
 Zuordnung siehe achirale GCMS des Racemates 27222 DIC-FR-081-01 20/7633  
 \* in der achiralen Messung Umlagerung/Zersetzung

Zuordnung der Komponent Peak 9+10 aus der achiralen Messung und Klärung der Umlagerung für die chirale Messung wäre sinnvoll, bitte um Rückmeldung

| No. | Ret.Time<br>min | Rel.Area<br>% | Peak Name      |
|-----|-----------------|---------------|----------------|
| 14  | 33,28           | 94,92         | * ? Umlagerung |
| 15  | 35,98           | 5,08          | *              |

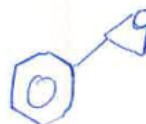

Instrument parameters:  
 Column: 30,0 m BGB-176/BGB-15 0.25/0.25df;G/618  
 Temperature: 220/ 70, 42 min iso 8/min 220, 3 min iso/ 350  
 Gas: 0,60 bar H2  
 Sample size: 0,2 µL

9.07.2021  
 J. Ruthe

Thiirane (*R*)-2, obtained with catalyst (*R*)-C7

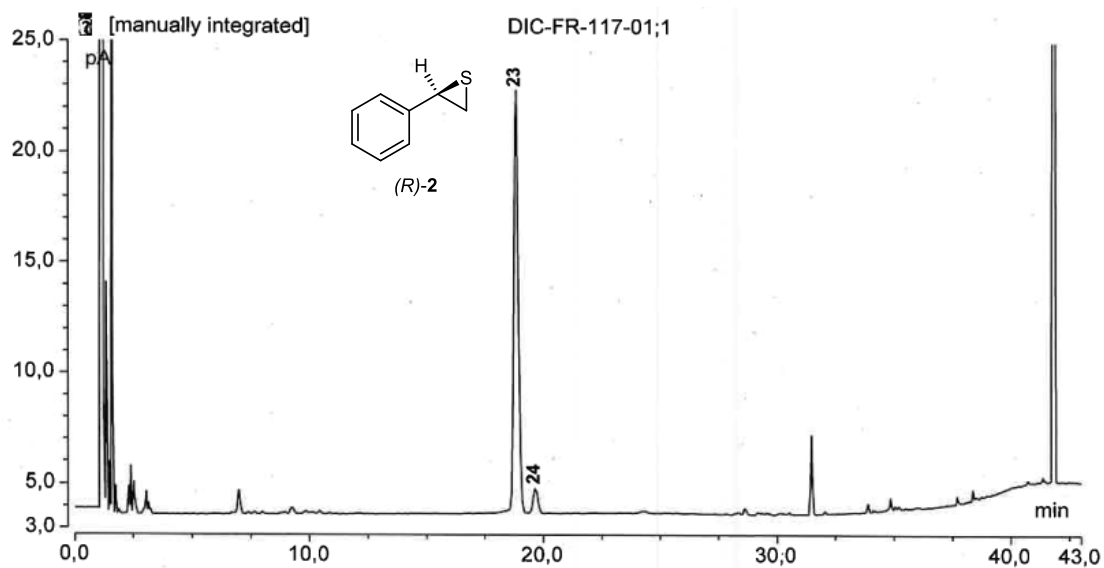

Sample: **DIC-FR-117-01;1**  
 Sequenz: **8307 DIC-FR Ru**  
 Sequenz date: **09.07.21**

Instrument: **GC\_521**  
 Measured: **13.07.21 08:12**  
 Processing M.: **ee DIC-FR**  
 Report-File: **ee 117-01**

chirale Messung, Verhältnis der Enantiomere

Zuordnung nach achiraler GCMS des Racemates 27223 DIC-FR-081-02 20/7633

ee unter Vorbehalt, Racemat nicht stabil (siehe Messungen auf BGB-176/BGB-15 G/618)

| No. | Ret.Time<br>min | Rel.Area<br>% | Peak Name |
|-----|-----------------|---------------|-----------|
| 23  | 18,81           | 94,02 .       |           |
| 24  | 19,64           | 5,98 .        |           |

Instrument parameters:

Column: 25,0 m Hydrodex-beta-TBDAC-CD 0.25/?df;G/625  
 Temperature: 220/ 100, 25 min iso, 8/min 220, 3 min iso/350  
 Gas: 0,60 bar Hydrogen  
 Sample size: 1,0 µL

M. Mascher

Epoxide (R)-1, obtained with catalyst (R)-C7

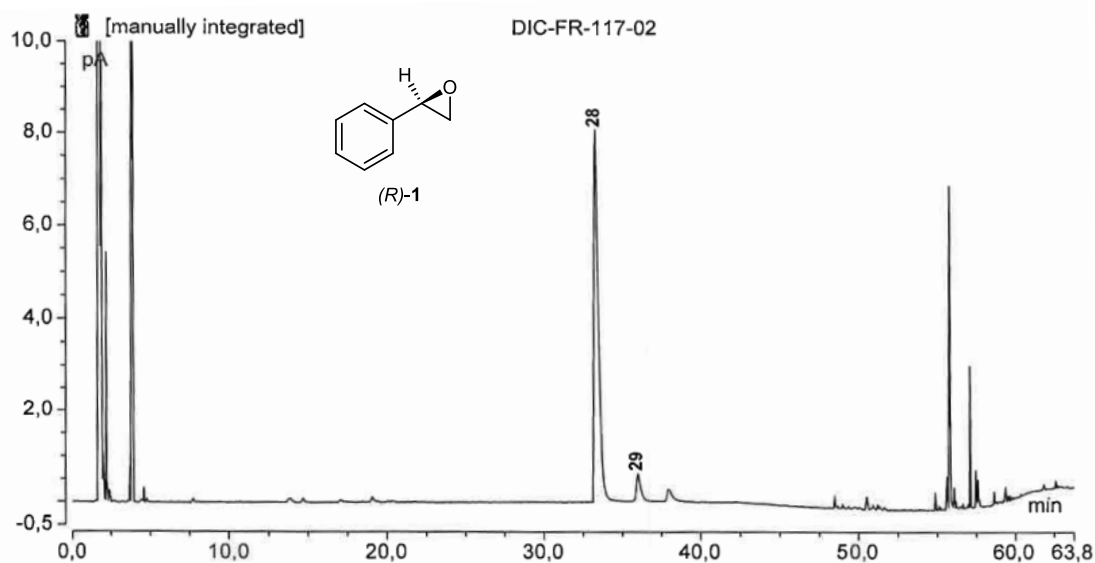

Sample: **DIC-FR-117-02**  
 Sequenz: **8307 DIC-FR Ru**  
 Sequenz date: **09.07.21**

Instrument: **GC\_313**  
 Measured: **13.07.21 08:19**  
 Processing M.: ee DIC-FR  
 Report-File: ee 117-02

chirale Messung, Verhältnis der Enantiomere

Zuordnung siehe achirale GCMS des Racemates 27222 DIC-FR-081-01 20/7633

| No. | Ret.Time<br>min | Rel.Area<br>% | Peak Name |
|-----|-----------------|---------------|-----------|
| 28  | 33,28           | 92,69         | .         |
| 29  | 36,00           | 7,31          | .         |

Instrument parameters:

Column: 30,0 m BGB-176/BGB-15 0.25/0.25df;G/618  
 Temperature: 220/ 70, 42 min iso 8/min 220, 3 min iso/ 350  
 Gas: 0,60 bar H2  
 Sample size: 1,0 µL

M. Masak

# Racemic Samples

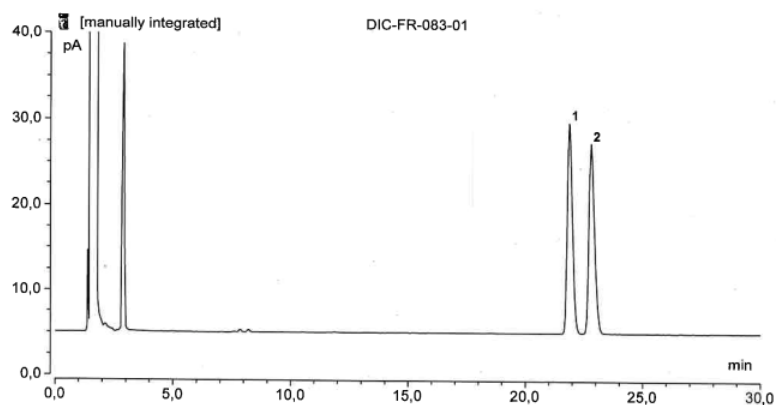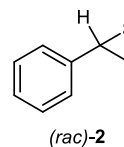

Sample: **DIC-FR-083-01** Instrument: **GC\_413**  
 Sequenz: **7822 DIC-FR VD** Measured: **23.11.20 14:30**  
 Sequenz date: **23.11.20** Processing M.: ee DIC-FR  
 Report-File: ee 083-01

chirale Messung des Racemates  
 Zuordnung nach achiraler GCMS 27223 DIC-FR-081-02 20/7633

| No. | Ret.Time<br>min | Rel.Area<br>% | Peak Name |
|-----|-----------------|---------------|-----------|
| 1   | 21,85           | 49,94         | .         |
| 2   | 22,79           | 50,06         | .         |

Instrument parameters:  
 Column: 25,0 m Hydrodex-beta-TBDAC-CD 0,25/2df G/681  
 Temperature: 220/ 100 iso/ 350  
 Gas: 0,60 bar Hydrogen  
 Sample size: 1,0 µL

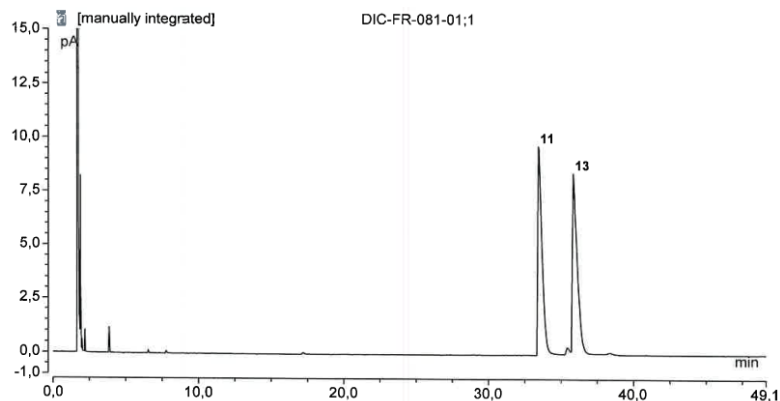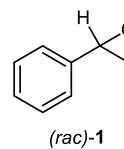

Sample: **DIC-FR-081-01;1** Instrument: **GC\_313**  
 Sequenz: **7633 DIC-FR SE** Measured: **09.09.20 11:29**  
 Sequenz date: **09.09.20** Processing M.: ee DIC  
 Report-File: Verhältnis 081-01

Racemat  
 Verhältnis der Enantiomere  
 Zuordnung achiral nach GCMS 27222 DIC-FR-081-01 20/7633  
 Verunreinigungen im Bereich der Enantiomere!

| No. | Ret.Time<br>min | Rel.Area<br>% | Peak Name |
|-----|-----------------|---------------|-----------|
| 11  | 33,44           | 50,00         | .         |
| 13  | 35,84           | 50,00         | .         |

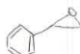

Instrument parameters:  
 Column: 30,0 m BGB-176/BGB-15 0,25/0,25df G/618  
 Temperature: 220/70 iso/350  
 Gas: 0,60 bar H2  
 Sample size: 0,2 µL

*E. dlv*

## 15. References

- [1] Eckhardt, M.; Frattini, S.; Hamprecht, D.; Himmelsbach, F.; Langkopf, E.; Lingard, I.; Peters, S.; Wagner, H. New indanyloxydihydrobenzofuranylacetic acids. U.S. Patent US 2013/0252937 A1, September 26, 2013.
- [2] Sasaki, S.; Murakami, F.; Murakami, M.; Watanabe, M.; Kato, K.; Sutoh, K.; Yoshifuji, M. Synthesis of Crowded Triarylphosphines Carrying Functional Sites. *J. Organomet. Chem.* **2005**, *690*, 2664–2672.
- [3] Cheng, X.; Goddard, R.; Buth, G.; List, B. Direct Catalytic Asymmetric Three-Component Kabachnik-Fields Reaction. *Angew. Chem. Int. Ed.* **2008**, *47*, 5079–5081.
- [4] Osakabe, H.; Saito, S.; Miyagawa, M.; Suga, T.; Uchikura, T.; Akiyama, T. Enantioselective Dehydroxyhydrogenation of 3-Indolylmethanols by the Combined Use of Benzothiazoline and Chiral Phosphoric Acid: Construction of a Tertiary Carbon Center. *Org. Lett.* **2020**, *22*, 2225–2229.
- [5] Cheon, C. H.; Yamamoto, H. A Brønsted Acid Catalyst for the Enantioselective Protonation Reaction. *J. Am. Chem. Soc.* **2008**, *130*, 9246–9247.
- [6] Romanov-Michailidis, F.; Guénée, L.; Alexakis, A. Enantioselective Organocatalytic Fluorination-Induced Wagner-Meerwein Rearrangement. *Angew. Chem. Int. Ed.* **2013**, *52*, 9266–9270.
- [7] Li, J.; Grosslight, S.; Miller, S. J.; Sigman, M. S.; Toste, F. D. Site-Selective Acylation of Natural Products with BINOL-Derived Phosphoric Acids. *ACS Catal.* **2019**, *9*, 9794–9799.
- [8] Terada, M.; Toda, Y. Double Bond Isomerization/Enantioselective Aza-Petasis-Ferrier Rearrangement Sequence as an Efficient Entry to Anti- and Enantioenriched Beta-Amino Aldehydes. *J. Am. Chem. Soc.* **2009**, *131*, 6354–6355.
- [9] Liao, S.; Leutzsch, M.; Monaco, M. R.; List, B. Catalytic Enantioselective Conversion of Epoxides to Thiiranes. *J. Am. Chem. Soc.* **2016**, *138*, 5230–5233.
- [10] Shaw, M. H.; Croft, R. A.; Whittingham, W. G.; Bower, J. F. Modular Access to Substituted Azocanes via a Rhodium-Catalyzed Cycloaddition-Fragmentation Strategy. *J. Am. Chem. Soc.* **2015**, *137* (25), 8054–8057.
